# Supplementary material for: Illuminating the Druggable Proteome with an AI Protein Profiling Platform
Source: Research Square preprint supplement (doi:10.21203/rs.3.rs-7667948/v1), 2025-10-03
Supplement: Supplementary file 1 [file 50c40ea2db50a83207206af4.xlsx]

## Sheet: TFs
	Table 1											DM_Archive		DM_webserver				LigCysABPP		FuzDrop (LLPS) [0.6 thr]	[2.2 thr]		ANCHOR2 (MoRF) binary dec
				pos votes	LigCys-S	LigCys-A	neg votes	LigCys-S	LigCys-A	relative score	top1	Label	Grade	pos votes (max=3x415)	KB02	KB03	KB05	Label	Grade	pDP	sBIND	pLLPS	>=.5
1	Q9Y261	FOXA2	CYS216	0	0	0	400	200	200	0	0	Negative	3R	14	0	11	3	-	-	0.53	2.3	0.9998	FALSE
	Q9Y261		CYS247	319	200	119	81	0	81	0.7975	1	-	-	20	5	9	6	Positive	1S-1R	0.37	1.86	0.9998	FALSE
	Q9Y261		CYS257	81	0	81	319	200	119	0.2025	0	-	-	-				-	-	0.37	1.57	0.9998	TRUE
	Q9Y261		CYS311	0	0	0	400	200	200	0	0	-	-	-				-	-	0.97	2.1	0.9998	TRUE
1b	P55317	FOXA1	CYS137	80	3	77	320	197	123	0.2	0	-	-	-				-	-	0.87	2.22	0.9998	FALSE
	P55317		CYS227	0	0	0	400	200	200	0	0	-	-	18	0	13	5	Negative*mv	1S-1R	0.31	2.25	0.9998	FALSE
	P55317		CYS258	315	197	118	85	3	82	0.7875	1	-	-	18	2	12	4	Positive	1S-5R	0.47	1.8	0.9998	TRUE
	P55317		CYS268	5	0	5	395	200	195	0.0125	0	-	-	-				Negative	1S-2R	0.83	2.7	0.9998	TRUE
2	P56693	SOX10	CYS22	7	7	0	393	193	200	0.03	0	Negative	2R	0				-	-	0.97	0.6	0.9994	TRUE
	P56693		CYS71	321	146	175	89	54	25	0.7775	1	Negative	5R	7+143	0+29	4+60	3+54	-	-	0.59	2.3	0.9994	TRUE
	P56693		CYS190	72	47	25	328	153	175	0.1925	0	Negative	2R	0				-	-	0.91	1.7	0.9994	TRUE
3	P15172	MYOD1	CYS21	50	24	26	350	176	174	0.125	0	-	-	'-				-	-	0.4	2.6	0.9931	FALSE
	P15172		CYS34	0	0	0	400	200	200	0	0	-	-	-				-	-	0.28	1.4	0.9931	FALSE
	P15172		CYS93	3	0	3	397	200	197	0.0075	0	-	-	-				-	-	0.61	2.1	0.9931	TRUE
	P15172		CYS98	2	0	2	398	200	198	0.005	0	-	-	-				-	-	0.5	2.2	0.9931	TRUE
	P15172		CYS101	48	39	9	352	161	191	0.12	0	-	-	-				-	-	0.37	2.7	0.9931	FALSE
	P15172		CYS135	0	0	0	400	200	200	0	0	-	-	2	0	2	0	-	-	0.67	1.9	0.9931	FALSE
	P15172		CYS206	0	0	0	400	200	200	0	0	-	-	0				-	-	0.96	0.5	0.9931	TRUE
	P15172		CYS225	2	2	0	398	198	200	0.005	0	-	-	1	0	1	0	-	-	0.91	2.4	0.9931	FALSE (.48)
	P15172		CYS251	295	135	160	105	65	40	0.7375	1	-	-	-				-	-	0.61	2.6	0.9931	TRUE
	P15172		CYS307	0	0	0	400	200	200	0	0	-	-	-				-	-	0.95	0.1	0.9931	TRUE
4	In training	NFkB1
5	Q06710	PAX8	CYS45	313	176	137	87	24	63	0.7825	1	-	-	38	6	23	9	-	-	0.3	2.4	0.9968	FALSE
	Q06710		CYS57	27	24	3	373	176	197	0.0675	0	-	-	216	33	111	72	-	-	0.27	2.7	0.9968	FALSE
	Q06710		CYS117	0	0	0	400	200	200	0	0	-	-	0+0				-	-	0.24	1.1	0.9968	FALSE
	Q06710		CYS147	0	0	0	400	200	200	0	0	-	-	5	0	5	0	-	-	0.51	2	0.9968	FALSE (.48)
	Q06710		CYS206	1	0	1	399	200	199	0.0025	0	-	-	-				-	-	0.89	2.3	0.9968	TRUE
	Q06710		CYS238	59	0	59	341	200	141	0.1475	0	-	-	0				-	-	0.65	2.6	0.9968	TRUE
6	P10242	MYB	CYS22	0	0	0	400	200	200	0	0			-						0.31	2.4	0.4896	FALSE (.49)
	P10242		CYS78	0	0	0	400	200	200	0	0	Negative	4R	0	0	0	0	-	-	0.15	1.2	0.4896	FALSE
	P10242		CYS130	0	0	0	400	200	200	0	0	-	-	-				-	-	0.31	1.7	0.4896	FALSE
	P10242		CYS322	348	167	181	52	33	19	0.87	1	-	-	-				-	-	0.44	1.6	0.4896	TRUE
	P10242		CYS347	0	0	0	400	200	200	0	0	-	-	-				-	-	0.92	1.8	0.4896	TRUE
	P10242		CYS374	50	31	19	350	169	181	0.125	0	-	-	3	0	3	0	-	-	0.44	2.5	0.4896	TRUE
	P10242		CYS542	1	1	0	399	199	200	0.0025	0	-	-	-				-	-	0.28	1.4	0.4896	TRUE
	P10242		CYS604	0	0	0	400	200	200	0	0	-	-	-				-	-	0.47	2	0.4896	FALSE
	P10242		CYS613	1	1	0	399	199	200	0.0025	0	-	-	-				-	-	0.28	2	0.4896	FALSE
7	Q13422	IKZF1	CYS71	1	1	0	399	199	200	0.0025	0	-	-	-				Negative	2S-2R	0.89	2	0.9037	FALSE/TRUE
	Q13422		CYS78	0	0	0	400	200	200	0	0	-	-	-				Negative* amb	1S-1R	0.81	2.4	0.9037	TRUE
	Q13422		CYS119	0	0	0	400	200	200	0	0	-	-	-				-	-	0.59	2.5	0.9037	FALSE
	Q13422		CYS122	0	0	0	400	200	200	0	0	-	-	-				-	-	0.55	2.4	0.9037	FALSE
	Q13422		CYS126	267	182	85	133	18	115	0.6675	1	-	-	-				-	-	0.45	2.2	0.9037	FALSE
	Q13422		CYS147	0	0	0	400	200	200	0	0	-	-	-				-	-	0.31	1.9	0.9037	FALSE
	Q13422		CYS150	0	0	0	400	200	200	0	0	-	-	-				-	-	0.32	2.1	0.9037	FALSE
	Q13422		CYS175	0	0	0	400	200	200	0	0	-	-	-				-	-	0.19	1.7	0.9037	FALSE
	Q13422		CYS178	0	0	0	400	200	200	0	0	-	-	-				-	-	0.19	1.8	0.9037	FALSE
	Q13422		CYS182	2	2	0	398	198	200	0.005	0	-	-	-				Negative	2S-3R	0.18	1.7	0.9037	FALSE
	Q13422		CYS203	0	0	0	400	200	200	0	0	-	-	-				-	-	0.28	1.4	0.9037	FALSE
	Q13422		CYS206	0	0	0	400	200	200	0	0	-	-	-				-	-	0.32	1.7	0.9037	FALSE
	Q13422		CYS223	4	4	0	396	196	200	0.01	0	-	-	-				-	-	0.29	2.5	0.9037	FALSE
	Q13422		CYS254	120	5	115	280	195	85	0.3	0	Negative	10R	5	0	1	4	Positive	1S-1R	0.33	2.2	0.9037	FALSE
	Q13422		CYS394	4	4	0	396	196	200	0.01	0	-	-	-				Negative	5S-8R	0.98	0.9	0.9037	FALSE/TRUE
	Q13422		CYS464	0	0	0	400	200	200	0	0	-	-	-				-	-	0.15	1.7	0.9037	FALSE
	Q13422		CYS467	0	0	0	400	200	200	0	0	-	-	-				-	-	0.18	1.8	0.9037	FALSE
	Q13422		CYS483	2	2	0	398	198	200	0.005	0	-	-	0				-	-	0.33	2	0.9037	FALSE
	Q13422		CYS492	0	0	0	400	200	200	0	0	-	-	-				-	-	0.16	2.1	0.9037	FALSE
	Q13422		CYS495	0	0	0	400	200	200	0	0	-	-	-				-	-	0.21	2.7	0.9037	FALSE
8	Q15306	IRF4	CYS19	11	0	11	389	200	189	0.0275	0	Negative	4R	3	0	1	2	Positive	1S-1R	0.73	2.9	0.6164	FALSE
	Q15306		CYS99	354	185	169	56	15	31	0.885	1			-				Positive	1S-1R	0.28	1.6	0.6164	FALSE
	Q15306		CYS194	1	1	0	399	199	200	0.0025	0	Negative	4R	9	2	7	0	Positive	2S-2R	0.58	1.9	0.6164	FALSE
	Q15306		CYS210	0	0	0	400	200	200	0	0			-				-	-	0.53	2.2	0.6164	FALSE
	Q15306		CYS214	24	4	20	376	196	180	0.06	0			-				-	-	0.45	2.2	0.6164	FALSE
	Q15306		CYS223	10	10	0	390	190	200	0.025	0			-				Negative	2S-2R	0.37	2.3	0.6164	FALSE
	Q15306		CYS250	0	0	0	400	200	200	0	0	Negative	4R	4	0	3	1	Negative	3S-7R	0.22	2.4	0.6164	FALSE
	Q15306		CYS255	0	0	0	400	200	200	0	0	Negative	2R	3	0	2	1	Negative	1S-1R	0.18	2.3	0.6164	FALSE
	Q15306		CYS274	0	0	0	400	200	200	0	0	Negative	4R	2	0	2	0	Negative	2S-6R	0.41	2.1	0.6164	FALSE
	Q15306		CYS330	0	0	0	400	200	200	0	0			0				-	-	0.18	1.5	0.6164	FALSE
	Q15306		CYS343	0	0	0	400	200	200	0	0	Negative	4R	0				Negative	4S-7R	0.23	1.5	0.6164	FALSE
	Q15306		CYS356	0	0	0	400	200	200	0	0			-				-	-	0.2	2.1	0.6164	FALSE
	Q15306		CYS386	0	0	0	400	200	200	0	0	Negative	2R	-				Negative	1S-1R	0.19	2.4	0.6164	FALSE
9	Q92754	TFAP2C	CYS15	0	0	0	400	200	200	0	0	-	-	0				Negative	1S-2R	0.64	2.9	0.8072	TRUE
	Q92754		CYS209	97	13	84	303	187	116	0.2425	0	Positive	2R	151	26	78	47	Positive	1S-9R	0.34	2.6	0.8072	FALSE
	Q92754		CYS225	102	100	2	298	100	198	0.255	1	-	-	0				Positive	1S-1R	0.21	2.1	0.8072	FALSE
	Q92754		CYS256	56	48	8	344	152	192	0.14	0	-	-	46	2	39	5	Negative*mv	1S-1R	0.24	1.7	0.8072	FALSE
	Q92754		CYS321	8	8	0	392	192	200	0.02	0	-	-	-				-		0.2	1.9	0.8072	FALSE
	Q92754		CYS359	0	0	0	400	200	200	0	0	-	-	53	0	29	24	Negative	1S-1R	0.3	2	0.8072	FALSE
	Q92754		CYS389	76	30	46	324	170	154	0.19	0	-	-	-				-	-	0.31	2.8	0.8072	FALSE
	Q92754		CYS406	61	1	60	339	199	140	0.1525	0	-	-	-				-	-	0.18	2	0.8072	FALSE

## Sheet: het
	Table 1											DM_Archive		DM_webserver				LigCysABPP		FuzDrop (LLPS) [0.6 thr]	[2.2 thr]		ANCHOR2 (MoRF) binary dec
				pos votes	LigCys-S	LigCys-A	neg votes	LigCys-S	LigCys-A	relative score	top1	Label	Grade	pos votes (max=3x415)	KB02	KB03	KB05	Label	Grade	pDP	sBIND	pLLPS	>=.5
P05141	SLC25A5	CYS57		168	87	81	232	113	119	0.42	0			386	0	256	130
P05141		CYS129		1	0	1	399	200	199	0.0025	0			37	0	17	20
P05141		CYS160		185	67	118	215	133	82	0.4625	1			291	10	186	95
P05141		CYS257		46	46	0	354	154	200	0.115	0			50	4	19	27
Q9P2J5	LARS1	CYS70		0	0	0	400	200	200	0	0				0	65	6
Q9P2J5		CYS83		5	5	0	395	195	200	0.0125	0
Q9P2J5		CYS84		24	0	24	376	200	176	0.06	0
Q9P2J5		CYS92		8	8	0	392	192	200	0.02	0
Q9P2J5		CYS100		50	40	10	350	160	190	0.125	0
Q9P2J5		CYS113		0	0	0	400	200	200	0	0				0	0	0
Q9P2J5		CYS248		19	15	4	381	185	196	0.0475	0				0	0	0
Q9P2J5		CYS305		0	0	0	400	200	200	0	0				0	6	8
Q9P2J5		CYS326		0	0	0	400	200	200	0	0				0	0	3
Q9P2J5		CYS446		0	0	0	400	200	200	0	0				0	4	2
Q9P2J5		CYS522		0	0	0	400	200	200	0	0
Q9P2J5		CYS527		23	0	23	877	200	177	0.0575	0
Q9P2J5		CYS546		0	0	0	400	200	200	0	0				3	142	198
Q9P2J5		CYS554		205	66	139	195	134	61	0.5125	1				268	350	125
Q9P2J5		CYS573		0	0	0	400	200	200	0	0				0	110	40
Q9P2J5		CYS863		0	0	0	400	200	200	0	0
Q9P2J5		CYS867		0	0	0	400	200	200	0	0
Q9P2J5		CYS936		0	0	0	400	200	200	0	0
Q9P2J5		CYS1052		0	0	0	400	200	200	0	0				0	0	0
Q9P2J5		CYS1053		66	66	0	334	134	200	0.165	0
Q9P2J5		CYS1093		0	0	0	400	200	200	0	0				0	17	8
P61247	RPS3A	CYS96		0	0	0	400	200	200	0	0				3	294	285
P61247		CYS111		400	200	200	0	0	0	1	1				164	230	243
P61247		CYS139		0	0	0	400	200	200	0	0				0	11	21
P61247		CYS201		0	0	0	400	200	200	0	0				0	59	41

## Sheet: always
	Table 1											DM_Archive		DM_webserver				LigCysABPP		FuzDrop (LLPS) [0.6 thr]	[2.2 thr]		ANCHOR2 (MoRF) binary dec
				pos votes	LigCys-S	LigCys-A	neg votes	LigCys-S	LigCys-A	relative score	top1	Label	Grade	pos votes (max=3x415)	KB02	KB03	KB05	Label	Grade	pDP	sBIND	pLLPS	>=.5
P0DPH7	TUBA3C	CYS4		0	0	0	400	200	200	0	0
P0DPH7		CYS20		0	0	0	400	200	200	0	0
P0DPH7		CYS25		0	0	0	400	200	200	0	0
P0DPH7		CYS129		0	0	0	400	200	200	0	0
P0DPH7		CYS200		0	0	0	400	200	200	0	0
P0DPH7		CYS213		0	0	0	400	200	200	0	0
P0DPH7		CYS295		0	0	0	400	200	200	0	0				2	171	106
P0DPH7		CYS305		0	0	0	400	200	200	0	0				0	0	3
P0DPH7		CYS315		0	0	0	400	200	200	0	0
P0DPH7		CYS316		0	0	0	400	200	200	0	0
P0DPH7		CYS347		400	200	200	0	0	0	1	1				0	401	78
P0DPH7		CYS376		0	0	0	400	200	200	0	0				0	349	108
P24752	ACAT1	CYS119		2	0	2	398	200	198	0.005	0				102	290	0
P24752		CYS126		389	200	189	11	0	11	0.9725	1				307	299	0
P24752		CYS142		0	0	0	400	200	200	0	0				0	5	0
P24752		CYS196		4	0	4	396	200	196	0.01	0				339	311	5
P24752		CYS413		5	0	5	395	200	195	0.0125	0				335	387	0
Q15365	PCBP1	CYS54		1	1	0	399	199	200	0.0025	0				0	150	1
Q15365		CYS109		1	1	0	399	199	200	0.0025	0				0	402	362
Q15365		CYS118		0	0	0	400	200	200	0	0
Q15365		CYS158		0	0	0	400	200	200	0	0				0	232	107
Q15365		CYS163		0	0	0	400	200	200	0	0				0	0	1
Q15365		CYS194		393	198	195	7	2	5	0.9825	1				0	12	0
Q15365		CYS201		0	0	0	400	200	200	0	0				0	3	1
Q15365		CYS293		0	0	0	400	200	200	0	0				1	14	0
Q15365		CYS355		5	0	5	395	200	195	0.0125	0

## Sheet: PTPNs
	Table 1											DM_Archive		DM_webserver				LigCysABPP		FuzDrop (LLPS) [0.6 thr]	[2.2 thr]		ANCHOR2 (MoRF) binary dec
				pos votes	LigCys-S	LigCys-A	neg votes	LigCys-S	LigCys-A	relative score	top1	Label	Grade	pos votes (max=3x415)	KB02	KB03	KB05	Label	Grade	pDP	sBIND	pLLPS	>=.5
P18031	PTPN1	CYS32		0	0	0	400	200	200	0	0				4	128	38
P18031		CYS92		0	0	0	400	200	200	0	0				5	34	1
P18031		CYS121		95	62	33	305	138	167	0.2375	0				17	269	53
P18031		CYS215		214	135	79	186	65	121	0.535	1				0	8	6
P18031		CYS226		0	0	0	400	200	200	0	0				1	4	1
P18031		CYS231		0	0	0	400	200	200	0	0
P18031		CYS324		0	0	0	400	200	200	0	0
P18031		CYS344		0	0	0	400	200	200	0	0				0	0	0
P18031		CYS414		16	0	16	384	200	184	0.04	0
P18031		CYS426		75	3	72	325	197	128	0.1875	0
P29350	PTPN6	CYS102		0	0	0	400	200	200	0	0				0	1	0
P29350		CYS171		2	0	2	398	200	198	0.005	0				1	2	0
P29350		CYS327		0	0	0	400	200	200	0	0				0	0	1
P29350		CYS361		3	3	0	397	197	200	0.0075	0				0	2	0
P29350		CYS382		0	0	0	400	200	200	0	0				0	0	0
P29350		CYS453		394	197	197	6	3	3	0.985	1
P29350		CYS480		1	0	1	399	200	199	0.0025	0
Q06124	PTPN11	CYS104		0	0	0	400	200	200	0	0				0	1	0
Q06124		CYS174		0	0	0	400	200	200	0	0
Q06124		CYS259		11	3	8	389	197	192	0.0275	0				0	29	33
Q06124		CYS318		181	13	168	219	187	32	0.4525	1				2	5	9
Q06124		CYS333		0	0	0	400	200	200	0	0				0	0	0
Q06124		CYS367		3	3	0	397	197	200	0.0075	0
Q06124		CYS459		177	153	24	223	47	176	0.4425	0
Q06124		CYS486		0	0	0	400	200	200	0	0				0	10	3
Q06124		CYS563		28	28	0	372	172	200	0.07	0
Q06124		CYS569		0	0	0	400	200	200	0	0
		PTPN6 is ABPP protein, none of the cys is ABPP positive
