# Supplementary material for: Illuminating the Druggable Proteome with an AI Protein Profiling Platform
Source: Research Square preprint supplement (doi:10.21203/rs.3.rs-7667948/v1), 2025-10-03
Supplement: Supplementary file 2 [file d11dede936718d86a7d90949.xlsx]

## Sheet: Table of Contents
		Illuminating the Druggable Proteome with an AI Protein Profiling Platform - Dayhoff II, Kortzak, Liu, Shen & Shen - 2025
		Supplemental Data #	Name	Description	Models are ensembles of 200
		SD1	Sources	Nomenclature and citations for ABPP + LC3D sources (publications)	n/a
		SD2	Representation	ESMC representation study: an empirical sweep of ESM C representation selection effects on LigCys performance	TRUE
		SD3	Consensus	Concensus labeling study: an empirical sweep of labeling criteria (nS-mR) effects on model performance	TRUE
		SD4	Source Ablation	Source ablation study: for each source remove all associated records from the database before consolidation (see Fig 1a for 'consolidation step')	TRUE
		SD5	Priority	Source prioritization study: for each source treat it's POS records as ground-truth (a single POS from the priority source overrides the 4S-4R rule for that cluster)	TRUE
		SD6	ABPP Extraction Log	Log of the ABPP-only data extraction and the production run initial extracted record statistics (see Fig 1a for 'extraction step')	n/a
		SD7	ABPP Splitting Log	Detailed log of multi-value and ambiguous record splitting during ABPP-only data extraction (see Fig1a for 'extraction step')	n/a
		SD8	ABPP Statistical Report	Statistical report cover the ABPP-only data post extraction (see Fig1a for 'extraction step')	n/a
		SD9	ABPP Orphaned	Report of orphaned multi-value/ambiguous--derived records dropped due to lack of unambiguous support	n/a
		SD10	UID Sequences	FASTA formatted UIDs and their respective validated sequences, fasta headers contain ROIs and mappings to sequence position	n/a
		SD11	Deduplication Log	Log of the UID deduplication in the production run	n/a
		SD12	Precluster Records	The complete set of records taking part in production run clustering	n/a
		SD13	Cys Groups Report	The cysteine groups report post-clustering for the production run	n/a
		SD14	4S4R Prod. Distillation	Complete distillation log for the production run (using 4S-4R labeling criteria)	n/a
		SD15	UID support report	UID level support report based on the Cys Groups Report	n/a
		SD16	ROI support report	ROI level support report based on the Cys Groups Report	n/a
		SD17	REP support report	Representative (1 per cluster) level support report based on the Cys Groups Report	n/a
		SD18	ABPP hold-out (S10) UIDs	UID details pulled from UID support report for the S10 test set (UIDs quantified by at least 10 sources with at least one quantified ligandable cysteine per protein)
		SD19	ABPP hold-out (S10) ROIs	ROI details pulled from ROI support report for the S10 test set	n/a
		SD20	Option Ablation Study	Impact of training using REPRESENTATIVE ONLY (PRO), allowing UNSEEN (unquantifed cys) to vote for label assignment, and restricting set w.r.t. #cys per prot	TRUE
		SD21	Split-level Noise Study	Quantifiying the degree of split-level noise in model performance evaluations	TRUE
				*note for "production runs" ABPP and LC3D are combined in a single distillation run (distillation is defined as the entire process shown in Fig1a)

## Sheet: SD1-Sources
	ABPP?	Shorthand	Year Published	Citation (MLA)
	TRUE	BC2016	2016	Backus, Keriann M., et al. "Proteome-wide covalent ligand discovery in native biological systems." Nature 534.7608 (2016): 570-574.
	TRUE	PC2017	2017	Bar-Peled, Liron, et al. "Chemical proteomics identifies druggable vulnerabilities in a genetically defined cancer." Cell 171.3 (2017): 696-709.
	TRUE	VC2020	2020	An Activity-Guided Map of Electrophile-Cysteine Interactions in Primary Human T Cells
	TRUE	CB2021	2021	Cao, Jian, et al. "Multiplexed CuAAC Suzuki–miyaura labeling for tandem activity-based chemoproteomic profiling." Analytical chemistry 93.4 (2021): 2610-2618.
	TRUE	KG2021	2021	Kuljanin, Miljan, et al. "Reimagining high-throughput profiling of reactive cysteines for cell-based screening of large electrophile libraries." Nature biotechnology 39.5 (2021): 630-641.
	TRUE	YB2021	2021	Yan, Tianyang, et al. "SP3‐faims chemoproteomics for high‐coverage profiling of the human cysteinome." ChemBioChem 22.10 (2021): 1841-1851.
	TRUE	YW2022	2022	Yang, Fan, et al. "Quantitative chemoproteomic profiling with data-independent acquisition-based mass spectrometry." Journal of the American Chemical Society 144.2 (2022): 901-911.
	TRUE	TC2022	2022	Tao, Yongfeng, et al. "Targeted protein degradation by electrophilic PROTACs that stereoselectively and site-specifically engage DCAF1." Journal of the American Chemical Society 144.40 (2022): 18688-18699.
	TRUE	YB2023	2023	Yan, Tianyang, et al. "Defining the cell surface cysteinome using two-step enrichment proteomics." JACS Au 3.12 (2023): 3506-3523.
	TRUE	KC2023	2023	Koo, Tin-Yan, et al. "N-Acryloylindole-alkyne (NAIA) enables imaging and profiling new ligandable cysteines and oxidized thiols by chemoproteomics." Nature communications 14.1 (2023): 3564.
	TRUE	BB2023	2023	Burton, Nikolas R., et al. "Solid-phase compatible silane-based cleavable linker enables custom isobaric quantitative chemoproteomics." Journal of the American Chemical Society 145.39 (2023): 21303-21318.
	TRUE	BB2024	2024	Burton, Nikolas R., and Keriann M. Backus. "Functionalizing tandem mass tags for streamlining click-based quantitative chemoproteomics." Communications Chemistry 7.1 (2024): 80.
	FALSE	LS2024	2024	Liu, Ruibin, et al. "Machine learning models to interrogate proteome-wide covalent ligandabilities directed at cysteines." JACS Au 4.4 (2024): 1374-1384.
	TRUE	NC2024	2024	Njomen, Evert, et al. "Multi-tiered chemical proteomic maps of tryptoline acrylamide–protein interactions in cancer cells." Nature chemistry 16.10 (2024): 1592-1604.
	TRUE	BB2025	2025	Biggs, George S., et al. "Robust proteome profiling of cysteine-reactive fragments using label-free chemoproteomics." Nature Communications 16.1 (2025): 73.
	TRUE	TY2025	2025	Tian, Caiping, et al. "Proteome-wide ligandability maps of drugs with diverse cysteine-reactive chemotypes." Nature Communications 16.1 (2025): 4863.

## Sheet: SD2-Representation
repr	LC3Dnr-auroc	LC3Dnr-auprc	LC3Dnr-precision	LC3Dnr-recall	LC3Dnr-f1	LC3Dnr-recov_topk1	LC3Dsp-recov_topk1
1	0.6756	0.5899	0.406	0.3953	0.3989	0.4188	0.4421
2	0.6958	0.6169	0.4359	0.4252	0.4288	0.453	0.4721
3	0.7035	0.6233	0.4658	0.4551	0.4587	0.4744	0.4936
4	0.6861	0.6033	0.4274	0.4188	0.4217	0.4359	0.4549
5	0.69	0.6099	0.4188	0.4103	0.4131	0.4444	0.4678
6	0.679	0.6027	0.4316	0.4209	0.4245	0.4402	0.4635
7	0.6772	0.6031	0.4231	0.4145	0.4174	0.4402	0.4635
8	0.6682	0.5991	0.4274	0.4209	0.4231	0.4444	0.4678
9	0.6781	0.6086	0.4274	0.4209	0.4231	0.453	0.4678
10	0.6724	0.5869	0.4359	0.4274	0.4302	0.4359	0.4549
11	0.6634	0.5853	0.4145	0.406	0.4088	0.4274	0.4464
12	0.6477	0.576	0.3974	0.3889	0.3917	0.4103	0.4421
13	0.6491	0.5657	0.3932	0.3868	0.3889	0.4017	0.4292
14	0.6585	0.5767	0.3675	0.3611	0.3632	0.3974	0.4163
15	0.6707	0.5991	0.4103	0.3996	0.4031	0.4402	0.4592
16	0.6734	0.5782	0.3889	0.3782	0.3818	0.3932	0.4163
17	0.6624	0.5799	0.4038	0.3953	0.3974	0.406	0.4206
18	0.6577	0.5762	0.391	0.3846	0.386	0.406	0.4206
19	0.6498	0.5837	0.3974	0.3889	0.3917	0.4145	0.4292
20	0.6637	0.5857	0.4017	0.391	0.3946	0.4231	0.4378
21	0.6526	0.5787	0.406	0.3953	0.3989	0.4188	0.4335
22	0.6458	0.5636	0.3632	0.3568	0.359	0.3846	0.4077
23	0.6482	0.5612	0.3632	0.3568	0.359	0.3889	0.412
24	0.6542	0.5575	0.3718	0.3632	0.3661	0.3803	0.412
25	0.6428	0.5468	0.3632	0.3568	0.359	0.3761	0.4077
26	0.6446	0.5556	0.3889	0.3825	0.3846	0.3974	0.4292
27	0.6194	0.5304	0.3547	0.3483	0.3504	0.3632	0.3863
28	0.6081	0.5162	0.359	0.3526	0.3547	0.359	0.382
29	0.6058	0.5234	0.3675	0.3611	0.3632	0.3718	0.3948
30	0.6038	0.511	0.3504	0.3462	0.3476	0.359	0.3863
31	0.5941	0.5148	0.3547	0.3483	0.3504	0.3632	0.3863
32	0.596	0.5063	0.3483	0.344	0.3454	0.3504	0.3777
33	0.577	0.4979	0.344	0.3419	0.3419	0.3462	0.3691
34	0.5791	0.4909	0.3333	0.3291	0.3305	0.3376	0.3605
35	0.575	0.49	0.3376	0.3312	0.3333	0.3376	0.3605
36	0.5665	0.4826	0.3376	0.3312	0.3333	0.3376	0.3605
37	0.5666	0.4833	0.3291	0.3248	0.3262	0.3333	0.3562
38	0.5704	0.4891	0.3291	0.3226	0.3248	0.3333	0.3605
39	0.5734	0.4858	0.3333	0.3269	0.3291	0.3376	0.3648
40	0.5786	0.4916	0.3376	0.3312	0.3333	0.3419	0.3777
41	0.5809	0.4963	0.3376	0.3312	0.3333	0.3419	0.3691
42	0.5789	0.4983	0.3462	0.3376	0.3405	0.3462	0.382
43	0.5825	0.5045	0.3568	0.3526	0.3533	0.3632	0.3991
44	0.6068	0.5169	0.3547	0.3483	0.3504	0.3718	0.3991
45	0.5825	0.498	0.3419	0.3355	0.3376	0.3462	0.3734
46	0.5968	0.5092	0.3611	0.3547	0.3561	0.3675	0.4077
47	0.6122	0.5387	0.359	0.3504	0.3533	0.3803	0.412
48	0.6151	0.528	0.3504	0.3462	0.3476	0.3504	0.382
49	0.6993	0.5962	0.4573	0.4509	0.453	0.4658	0.5021
50	0.7091	0.6213	0.4915	0.4829	0.4858	0.5	0.5408
51	0.6929	0.6138	0.4829	0.4765	0.4786	0.4829	0.5279
52	0.7665	0.674	0.5427	0.5321	0.5356	0.5556	0.6009
53	0.7582	0.677	0.5513	0.5406	0.5442	0.5641	0.6009
54	0.7491	0.6735	0.5427	0.5321	0.5356	0.5513	0.5966
55	0.7549	0.6745	0.5342	0.5235	0.5271	0.5385	0.5794
56	0.766	0.6831	0.5256	0.515	0.5185	0.547	0.588
57	0.7789	0.6926	0.5299	0.5192	0.5228	0.5641	0.6052
58	0.7882	0.6988	0.5385	0.5278	0.5313	0.5684	0.6094
59	0.7998	0.7076	0.5598	0.5491	0.5527	0.5769	0.6223
60	0.8017	0.7194	0.547	0.5385	0.5413	0.594	0.6524
61	0.8066	0.7171	0.5684	0.5598	0.5627	0.5897	0.6352
62	0.797	0.7088	0.5598	0.5513	0.5541	0.5855	0.6266
63	0.8095	0.7331	0.5726	0.562	0.5655	0.6154	0.6609
64	0.8061	0.7292	0.5684	0.5577	0.5613	0.6154	0.6567
65	0.8041	0.7335	0.5556	0.547	0.5499	0.6111	0.6567
66	0.7979	0.7299	0.5983	0.5876	0.5912	0.6197	0.6695
67	0.8105	0.7392	0.5983	0.5876	0.5912	0.6197	0.6695
68	0.8152	0.7501	0.6239	0.6132	0.6168	0.6496	0.6996
69	0.8078	0.725	0.5897	0.5791	0.5826	0.5983	0.6481
70	0.8186	0.7345	0.5855	0.5769	0.5798	0.6154	0.6695
71	0.8293	0.7496	0.6239	0.6154	0.6182	0.641	0.6996
72	0.8331	0.7553	0.641	0.6325	0.6353	0.6538	0.7124
73	0.8286	0.7522	0.6453	0.6368	0.6396	0.6538	0.6996
74	0.8529	0.7802	0.688	0.6795	0.6823	0.7009	0.7425
75	0.8608	0.7934	0.7094	0.7009	0.7037	0.7137	0.7554
76	0.86	0.7937	0.7158	0.7073	0.7101	0.7222	0.7639
77	0.8536	0.7749	0.7009	0.6859	0.6909	0.7009	0.7382
78	0.8474	0.764	0.6688	0.6624	0.6638	0.6709	0.7253
79	0.832	0.7424	0.6453	0.6368	0.6396	0.6453	0.6953
80	0.8316	0.7409	0.6368	0.6261	0.6296	0.6368	0.691

## Sheet: SD3-Consensus
model	LC3Dnr-auroc	LC3Dnr-auprc	LC3Dnr-precision	LC3Dnr-recall	LC3Dnr-f1	LC3Dnr-recov_topk1	LC3Dsp-recov_topk1
sep02_s1r2-s1r2_PRO	0.8096	0.7017	0.5598	0.5513	0.5541	0.5684	0.5966
sep02_s1r3-s1r3_PRO	0.8589	0.7667	0.6239	0.6197	0.6211	0.6538	0.6824
sep02_s1r4-s1r4_PRO	0.8633	0.7819	0.6538	0.6496	0.651	0.6838	0.7296
sep02_s1r5-s1r5_PRO	0.8747	0.8017	0.7009	0.6966	0.698	0.7179	0.7597
sep02_s2r2-s2r2_PRO	0.8429	0.7707	0.6538	0.6474	0.6496	0.6624	0.7039
sep02_s2r3-s2r3_PRO	0.8555	0.7737	0.6453	0.641	0.6425	0.6667	0.7039
sep02_s2r4-s2r4_PRO	0.8642	0.7887	0.6966	0.688	0.6909	0.7094	0.7511
sep02_s2r5-s2r5_PRO	0.8666	0.7956	0.7179	0.7094	0.7123	0.7222	0.7682
sep02_s3r3-s3r3_PRO	0.8668	0.7888	0.688	0.6816	0.6838	0.7009	0.7425
sep02_s3r4-s3r4_PRO	0.8833	0.8026	0.6838	0.6752	0.6781	0.7137	0.7554
sep02_s3r5-s3r5_PRO	0.877	0.8082	0.7265	0.7179	0.7208	0.735	0.7768
sep02_s4r4-s4r4_PRO	0.8734	0.8126	0.7436	0.7329	0.7365	0.7521	0.794
sep02_s4r5-s4r5_PRO	0.8615	0.8031	0.7436	0.7329	0.7365	0.7436	0.7897
sep02_s5r5-s5r5_PRO	0.8564	0.7984	0.7137	0.703	0.7066	0.7265	0.7682

## Sheet: SD4-Source-Ablation
model	LC3Dnr-auroc	LC3Dnr-auprc	LC3Dnr-precision	LC3Dnr-recall	LC3Dnr-f1	LC3Dnr-recov_topk1	LC3Dsp-recov_topk1
aug29_s4r4-s4r4_NPR_noKC2023	0.8766	0.8254	0.7692	0.7564	0.7607	0.7692	0.8155
aug29_s4r4-s4r4_NPR_noNC2024	0.8804	0.8254	0.7521	0.7415	0.745	0.7564	0.8026
aug29_s4r4-s4r4_NPR_noTY2025	0.8758	0.8137	0.7521	0.7393	0.7436	0.7521	0.8069
aug29_s4r4-s4r4_NPR_noVC2020	0.8699	0.8025	0.7179	0.7073	0.7108	0.7308	0.7682
aug29_s4r4-s4r4_NPR_noBB2024	0.8705	0.8214	0.7521	0.7393	0.7436	0.7564	0.8069
aug29_s4r4-s4r4_NPR_noCB2021	0.8823	0.8288	0.7692	0.7564	0.7607	0.7692	0.8155
aug29_s4r4-s4r4_NPR_noBB2025	0.8811	0.8277	0.765	0.7521	0.7564	0.7692	0.8069
aug29_s4r4-s4r4_NPR_noBC2016	0.8862	0.8292	0.7607	0.7479	0.7521	0.765	0.8069
aug29_s4r4-s4r4_NPR_noTC2022	0.8859	0.8297	0.7521	0.7393	0.7436	0.7607	0.8026
aug29_s4r4-s4r4_NPR_noYB2023	0.8877	0.8346	0.765	0.7521	0.7564	0.7735	0.8112
aug29_s4r4-s4r4_NPR_noKG2021	0.878	0.8253	0.7692	0.7564	0.7607	0.7692	0.8155
aug29_s4r4-s4r4_NPR_noYW2022	0.8818	0.8273	0.7521	0.7393	0.7436	0.765	0.8197
aug29_s4r4-s4r4_NPR_noBB2023	0.8491	0.7941	0.7094	0.6987	0.7023	0.7222	0.7639
aug29_s4r4-s4r4_NPR_noPC2017	0.877	0.814	0.7137	0.703	0.7066	0.7393	0.7811
aug29_s4r4-s4r4_NPR_noYB2021	0.8823	0.8292	0.7543	0.7436	0.7464	0.765	0.8069

## Sheet: SD5-Priority
model	LC3Dnr-auroc	LC3Dnr-auprc	LC3Dnr-precision	LC3Dnr-recall	LC3Dnr-f1	LC3Dnr-recov_topk1	LC3Dsp-recov_topk1
sep01_s4r4-s4r4_NPR_prioPC2017	0.882	0.8227	0.7479	0.735	0.7393	0.7479	0.7854
sep01_s4r4-s4r4_NPR_prioBB2024	0.8816	0.8212	0.7479	0.735	0.7393	0.7521	0.7897
sep01_s4r4-s4r4_NPR_prioTC2022	0.8878	0.8269	0.7564	0.7436	0.7479	0.7564	0.794
sep01_s4r4-s4r4_NPR_prioKG2021	0.8438	0.7831	0.6453	0.6346	0.6382	0.6966	0.7468
sep01_s4r4-s4r4_NPR_prioYB2023	0.8717	0.8089	0.7308	0.7179	0.7222	0.735	0.7768
sep01_s4r4-s4r4_NPR_prioTY2025	0.7115	0.5946	0.3846	0.3761	0.3789	0.4274	0.4592
sep01_s4r4-s4r4_NPR_prioCB2021	0.8615	0.7991	0.6709	0.6624	0.6652	0.7051	0.7468
sep01_s4r4-s4r4_NPR_prioYW2022	0.8688	0.8071	0.7179	0.7073	0.7108	0.7179	0.7639
sep01_s4r4-s4r4_NPR_prioBB2025	0.8843	0.8239	0.7393	0.7265	0.7308	0.7479	0.7854
sep01_s4r4-s4r4_NPR_prioNC2024	0.8824	0.8255	0.7543	0.7436	0.7464	0.7607	0.8026
sep01_s4r4-s4r4_NPR_prioBC2016	0.8844	0.8342	0.7692	0.7564	0.7607	0.7735	0.8197
sep01_s4r4-s4r4_NPR_prioYB2021	0.8586	0.8021	0.7094	0.7009	0.7037	0.7222	0.7682
sep01_s4r4-s4r4_NPR_prioBB2023	0.8465	0.7579	0.641	0.6303	0.6339	0.6496	0.6867
sep01_s4r4-s4r4_NPR_prioKC2023	0.8779	0.8034	0.688	0.6795	0.6823	0.7137	0.7597
sep01_s4r4-s4r4_NPR_prioVC2020	0.8452	0.7582	0.6282	0.6197	0.6225	0.6453	0.6781

## Sheet: SD6-ABPP-Extraction-Summary
	ORIGINAL RAW-LINE COUNTS
	------------------------											Records					ROIs (cysteines)				UIDs (proteins)
	Single-value lines : 663886											total	single-value	multi-value	ambiguous		total	duplicate	new		total	duplicate	new
	Ambiguous lines : 5764										BB2023:	41432	39294	0	2138		15146	0	15146		4933	0	4933
	Multi-value lines : 1998										BB2024:	25640	25640	0	0		6465	5256	1209		3122	2884	238
											BB2025:	839	833	6	0		441	200	241		416	323	93
	POST-SPLITTING COUNTS										BC2016:	6440	6440	0	0		6157	4404	1753		2885	2429	456
	---------------------										CB2021:	3594	3458	131	5		2685	2531	154		1481	1454	27
	Total records after splitting : 683192										KC2023:	14322	7830	6492	0		11352	4785	6567		6676	3064	3612
	Split from ambiguous originals : 12160										KG2021:	63879	63879	0	0		29603	9413	20190		6902	4349	2553
	Split from multi-value originals : 7146										LS2024:	307	307	0	0		307	0	307		305	0	305
											NC2024:	862	522	0	340		306	225	81		218	201	17
	RECORDS PER SOURCE (AFTER SPLITTING)										PC2017:	4192	3328	0	864		1254	1030	224		904	839	65
	------------------------------------										TC2022:	40156	40156	0	0		10039	7774	2265		3999	3700	299
	TY2025 423220										TY2025:	423220	423220	0	0		18918	13176	5742		7170	5779	1391
	KG2021 63879										VC2020:	40333	32624	0	7709		23404	19541	3863		6551	6087	464
	BB2023 41432										YB2021:	7493	6873	272	348		7214	6700	514		3186	3057	129
	VC2020 40333										YB2023:	2199	2183	0	16		2187	1985	202		1374	1324	50
	TC2022 40156										YW2022:	8591	7606	245	740		8511	7958	553		3799	3709	90
	BB2024 25640										TOTALS:	683499	664193	7146	12160		143989	84978	59011		53921	39199	14722
	KC2023 14322									ABPP-ONLY-TOTALS:		683192	663886	7146	12160		143682	84978	58704		53616	39199	14417
	YW2022 8591									LS2024 is not ABPP, it is LC3D and was included in the production distillation
	YB2021 7493
	BC2016 6440
	PC2017 4192
	CB2021 3594
	YB2023 2199
	NC2024 862
	BB2025 839
	PROTEIN-LEVEL METRICS
	---------------------
	Total unique proteins (all sources) : 14417
	Unique proteins per source:
	BB2023 4933
	BB2024 3122
	BB2025 416
	BC2016 2885
	CB2021 1481
	KC2023 6676
	KG2021 6902
	NC2024 218
	PC2017 904
	TC2022 3999
	TY2025 7170
	VC2020 6551
	YB2021 3186
	YB2023 1374
	YW2022 3799
	UNIQUE (UID	ROI) CONTRIBUTIONS PER SOURCE
	-----------------------------------------
	BB2023 2385
	BB2024 251
	BB2025 83
	BC2016 316
	CB2021 28
	KC2023 5124
	KG2021 13314
	NC2024 37
	PC2017 147
	TC2022 449
	TY2025 4393
	VC2020 3576
	YB2021 490
	YB2023 193
	YW2022 553
	OVERALL UID+ROI STATISTICS
	--------------------------
	Total distinct (UID	ROI) pairs : 58704
	Pairs shared across multiple sources : 27365
	Pairs unique to exactly one source : 31339

## Sheet: SD7-Splitting
	ROI Field : 201;211
	Splits
	- UID: Q9BUF5	ROI: 201
	- UID: Q9BUF5	ROI: 211
	File : lcr_VC2020.dat
	Orig Line : Q9BVA1 201;211 1.12 4 FALSE VC2022 elab
	Type : AMBIGUOUS
	UID Field : Q9BVA1
	ROI Field : 201;211
	Splits
	- UID: Q9BVA1	ROI: 201
	- UID: Q9BVA1	ROI: 211
	File : lcr_VC2020.dat
	Orig Line : P35249 177;180 1.12 4 FALSE VC2022 elab
	Type : AMBIGUOUS
	UID Field : P35249
	ROI Field : 177;180
	Splits
	- UID: P35249	ROI: 177
	- UID: P35249	ROI: 180
	File : lcr_VC2020.dat
	Orig Line : Q9UK59 8;9 1.12 4 FALSE VC2022 elab
	Type : AMBIGUOUS
	UID Field : Q9UK59
	ROI Field : 8;9
	Splits
	- UID: Q9UK59	ROI: 8
	- UID: Q9UK59	ROI: 9
	File : lcr_VC2020.dat
	Orig Line : Q99549 689;693 1.12 4 FALSE VC2022 elab
	Type : AMBIGUOUS
	UID Field : Q99549
	ROI Field : 689;693
	Splits
	- UID: Q99549	ROI: 689
	- UID: Q99549	ROI: 693
	File : lcr_VC2020.dat
	Orig Line : P78527 457;458 1.12 4 FALSE VC2022 elab
	Type : AMBIGUOUS
	UID Field : P78527
	ROI Field : 457;458
	Splits
	- UID: P78527	ROI: 457
	- UID: P78527	ROI: 458
	File : lcr_VC2020.dat
	Orig Line : Q9H4E7 279;282 1.12 4 FALSE VC2022 elab
	Type : AMBIGUOUS
	UID Field : Q9H4E7
	ROI Field : 279;282
	Splits
	- UID: Q9H4E7	ROI: 279
	- UID: Q9H4E7	ROI: 282
	File : lcr_VC2020.dat
	Orig Line : P26010 543;545 1.12 4 FALSE VC2022 elab
	Type : AMBIGUOUS
	UID Field : P26010
	ROI Field : 543;545
	Splits
	- UID: P26010	ROI: 543
	- UID: P26010	ROI: 545
	File : lcr_VC2020.dat
	Orig Line : Q9UPN6 514;518 1.12 4 FALSE VC2022 elab
	Type : AMBIGUOUS
	UID Field : Q9UPN6
	ROI Field : 514;518
	Splits
	- UID: Q9UPN6	ROI: 514
	- UID: Q9UPN6	ROI: 518
	File : lcr_VC2020.dat
	Orig Line : Q14202 480;484 1.12 4 FALSE VC2022 elab
	Type : AMBIGUOUS
	UID Field : Q14202
	ROI Field : 480;484
	Splits
	- UID: Q14202	ROI: 480
	- UID: Q14202	ROI: 484
	File : lcr_VC2020.dat
	Orig Line : P60900 136;137 1.12 4 FALSE VC2022 elab
	Type : AMBIGUOUS
	UID Field : P60900
	ROI Field : 136;137
	Splits
	- UID: P60900	ROI: 136
	- UID: P60900	ROI: 137
	File : lcr_VC2020.dat
	Orig Line : Q96EE3 165;167 1.12 4 FALSE VC2022 elab
	Type : AMBIGUOUS
	UID Field : Q96EE3
	ROI Field : 165;167
	Splits
	- UID: Q96EE3	ROI: 165
	- UID: Q96EE3	ROI: 167
	File : lcr_VC2020.dat
	Orig Line : P78332 556;559 1.12 4 FALSE VC2022 elab
	Type : AMBIGUOUS
	UID Field : P78332
	ROI Field : 556;559
	Splits
	- UID: P78332	ROI: 556
	- UID: P78332	ROI: 559
	File : lcr_VC2020.dat
	Orig Line : P55210 114;116 1.12 4 FALSE VC2022 elab
	Type : AMBIGUOUS
	UID Field : P55210
	ROI Field : 114;116
	Splits
	- UID: P55210	ROI: 114
	- UID: P55210	ROI: 116
	File : lcr_VC2020.dat
	Orig Line : P49711 268;271;275 1.12 4 FALSE VC2022 elab
	Type : AMBIGUOUS
	UID Field : P49711
	ROI Field : 268;271;275
	Splits
	- UID: P49711	ROI: 268
	- UID: P49711	ROI: 271
	- UID: P49711	ROI: 275
	File : lcr_VC2020.dat
	Orig Line : Q9UHB6 390;393 1.12 4 FALSE VC2022 elab
	Type : AMBIGUOUS
	UID Field : Q9UHB6
	ROI Field : 390;393
	Splits
	- UID: Q9UHB6	ROI: 390
	- UID: Q9UHB6	ROI: 393
	File : lcr_VC2020.dat
	Orig Line : P07814 1448;1453 1.12 4 FALSE VC2022 elab
	Type : AMBIGUOUS
	UID Field : P07814
	ROI Field : 1448;1453
	Splits
	- UID: P07814	ROI: 1448
	- UID: P07814	ROI: 1453
	File : lcr_VC2020.dat
	Orig Line : Q9ULU4 103;106 1.12 4 FALSE VC2022 elab
	Type : AMBIGUOUS
	UID Field : Q9ULU4
	ROI Field : 103;106
	Splits
	- UID: Q9ULU4	ROI: 103
	- UID: Q9ULU4	ROI: 106
	File : lcr_VC2020.dat
	Orig Line : Q96MF7 210;215 1.12 4 FALSE VC2022 elab
	Type : AMBIGUOUS
	UID Field : Q96MF7
	ROI Field : 210;215
	Splits
	- UID: Q96MF7	ROI: 210
	- UID: Q96MF7	ROI: 215
	File : lcr_VC2020.dat
	Orig Line : Q14202 311;314 1.12 4 FALSE VC2022 elab
	Type : AMBIGUOUS
	UID Field : Q14202
	ROI Field : 311;314
	Splits
	- UID: Q14202	ROI: 311
	- UID: Q14202	ROI: 314
	File : lcr_VC2020.dat
	Orig Line : Q15527 29;38 1.12 4 FALSE VC2022 elab
	Type : AMBIGUOUS
	UID Field : Q15527
	ROI Field : 29;38
	Splits
	- UID: Q15527	ROI: 29
	- UID: Q15527	ROI: 38
	File : lcr_VC2020.dat
	Orig Line : P21291 10;13 1.12 4 FALSE VC2022 elab
	Type : AMBIGUOUS
	UID Field : P21291
	ROI Field : 10;13
	Splits
	- UID: P21291	ROI: 10
	- UID: P21291	ROI: 13
	File : lcr_VC2020.dat
	Orig Line : Q5HYJ3 103;106 1.12 4 FALSE VC2022 elab
	Type : AMBIGUOUS
	UID Field : Q5HYJ3
	ROI Field : 103;106
	Splits
	- UID: Q5HYJ3	ROI: 103
	- UID: Q5HYJ3	ROI: 106
	File : lcr_VC2020.dat
	Orig Line : Q9BYW2 1678;1685 1.12 4 FALSE VC2022 elab
	Type : AMBIGUOUS
	UID Field : Q9BYW2
	ROI Field : 1678;1685
	Splits
	- UID: Q9BYW2	ROI: 1678
	- UID: Q9BYW2	ROI: 1685
	File : lcr_VC2020.dat
	Orig Line : Q9C0K0 457;460;464 1.12 4 FALSE VC2022 elab
	Type : AMBIGUOUS
	UID Field : Q9C0K0
	ROI Field : 457;460;464
	Splits
	- UID: Q9C0K0	ROI: 457
	- UID: Q9C0K0	ROI: 460
	- UID: Q9C0K0	ROI: 464
	File : lcr_VC2020.dat
	Orig Line : Q9H2C2 34;37 1.12 4 FALSE VC2022 elab
	Type : AMBIGUOUS
	UID Field : Q9H2C2
	ROI Field : 34;37
	Splits
	- UID: Q9H2C2	ROI: 34
	- UID: Q9H2C2	ROI: 37
	File : lcr_VC2020.dat
	Orig Line : Q9H4L4 568;570 1.12 4 FALSE VC2022 elab
	Type : AMBIGUOUS
	UID Field : Q9H4L4
	ROI Field : 568;570
	Splits
	- UID: Q9H4L4	ROI: 568
	- UID: Q9H4L4	ROI: 570
	File : lcr_VC2020.dat
	Orig Line : Q9NUP1 210;211 1.12 4 FALSE VC2022 elab
	Type : AMBIGUOUS
	UID Field : Q9NUP1
	ROI Field : 210;211
	Splits
	- UID: Q9NUP1	ROI: 210
	- UID: Q9NUP1	ROI: 211
	File : lcr_VC2020.dat
	Orig Line : Q9Y4A5 1874;1879 1.12 4 FALSE VC2022 elab
	Type : AMBIGUOUS
	UID Field : Q9Y4A5
	ROI Field : 1874;1879
	Splits
	- UID: Q9Y4A5	ROI: 1874
	- UID: Q9Y4A5	ROI: 1879
	File : lcr_VC2020.dat
	Orig Line : Q08AF3 601;610;611 1.11 4 FALSE VC2022 elab
	Type : AMBIGUOUS
	UID Field : Q08AF3
	ROI Field : 601;610;611
	Splits
	- UID: Q08AF3	ROI: 601
	- UID: Q08AF3	ROI: 610
	- UID: Q08AF3	ROI: 611
	File : lcr_VC2020.dat
	Orig Line : Q08AF3 489;495;496 1.11 4 FALSE VC2022 elab
	Type : AMBIGUOUS
	UID Field : Q08AF3
	ROI Field : 489;495;496
	Splits
	- UID: Q08AF3	ROI: 489
	- UID: Q08AF3	ROI: 495
	- UID: Q08AF3	ROI: 496
	File : lcr_VC2020.dat
	Orig Line : O43847 1109;1126 1.11 4 FALSE VC2022 elab
	Type : AMBIGUOUS
	UID Field : O43847
	ROI Field : 1109;1126
	Splits
	- UID: O43847	ROI: 1109
	- UID: O43847	ROI: 1126
	File : lcr_VC2020.dat
	Orig Line : Q9NTI5 571;573 1.11 4 FALSE VC2022 elab
	Type : AMBIGUOUS
	UID Field : Q9NTI5
	ROI Field : 571;573
	Splits
	- UID: Q9NTI5	ROI: 571
	- UID: Q9NTI5	ROI: 573
	File : lcr_VC2020.dat
	Orig Line : Q8IY67 222;224 1.11 4 FALSE VC2022 elab
	Type : AMBIGUOUS
	UID Field : Q8IY67
	ROI Field : 222;224
	Splits
	- UID: Q8IY67	ROI: 222
	- UID: Q8IY67	ROI: 224
	File : lcr_VC2020.dat
	Orig Line : Q9H0A0 486;489 1.11 4 FALSE VC2022 elab
	Type : AMBIGUOUS
	UID Field : Q9H0A0
	ROI Field : 486;489
	Splits
	- UID: Q9H0A0	ROI: 486
	- UID: Q9H0A0	ROI: 489
	File : lcr_VC2020.dat
	Orig Line : P05107 43;46 1.11 4 FALSE VC2022 elab
	Type : AMBIGUOUS
	UID Field : P05107
	ROI Field : 43;46
	Splits
	- UID: P05107	ROI: 43
	- UID: P05107	ROI: 46
	File : lcr_VC2020.dat
	Orig Line : Q14697 41;47 1.11 4 FALSE VC2022 elab
	Type : AMBIGUOUS
	UID Field : Q14697
	ROI Field : 41;47
	Splits
	- UID: Q14697	ROI: 41
	- UID: Q14697	ROI: 47
	File : lcr_VC2020.dat
	Orig Line : Q9H061 85;98;101 1.11 4 FALSE VC2022 elab
	Type : AMBIGUOUS
	UID Field : Q9H061
	ROI Field : 85;98;101
	Splits
	- UID: Q9H061	ROI: 85
	- UID: Q9H061	ROI: 98
	- UID: Q9H061	ROI: 101
	File : lcr_VC2020.dat
	Orig Line : P49591 395;398 1.11 4 FALSE VC2022 elab
	Type : AMBIGUOUS
	UID Field : P49591
	ROI Field : 395;398
	Splits
	- UID: P49591	ROI: 395
	- UID: P49591	ROI: 398
	File : lcr_VC2020.dat
	Orig Line : P78527 2244;2248 1.11 4 FALSE VC2022 elab
	Type : AMBIGUOUS
	UID Field : P78527
	ROI Field : 2244;2248
	Splits
	- UID: P78527	ROI: 2244
	- UID: P78527	ROI: 2248
	File : lcr_VC2020.dat
	Orig Line : O75170 450;451 1.11 4 FALSE VC2022 elab
	Type : AMBIGUOUS
	UID Field : O75170
	ROI Field : 450;451
	Splits
	- UID: O75170	ROI: 450
	- UID: O75170	ROI: 451
	File : lcr_VC2020.dat
	Orig Line : P55769 93;102 1.11 4 FALSE VC2022 elab
	Type : AMBIGUOUS
	UID Field : P55769
	ROI Field : 93;102
	Splits
	- UID: P55769	ROI: 93
	- UID: P55769	ROI: 102
	File : lcr_VC2020.dat
	Orig Line : O14787 132;143 1.11 4 FALSE VC2022 elab
	Type : AMBIGUOUS
	UID Field : O14787
	ROI Field : 132;143
	Splits
	- UID: O14787	ROI: 132
	- UID: O14787	ROI: 143
	File : lcr_VC2020.dat
	Orig Line : Q13895 295;300 1.11 4 FALSE VC2022 elab
	Type : AMBIGUOUS
	UID Field : Q13895
	ROI Field : 295;300
	Splits
	- UID: Q13895	ROI: 295
	- UID: Q13895	ROI: 300
	File : lcr_VC2020.dat
	Orig Line : P63272 16;19 1.11 4 FALSE VC2022 elab
	Type : AMBIGUOUS
	UID Field : P63272
	ROI Field : 16;19
	Splits
	- UID: P63272	ROI: 16
	- UID: P63272	ROI: 19
	File : lcr_VC2020.dat
	Orig Line : Q8TDB6 561;564 1.11 4 FALSE VC2022 elab
	Type : AMBIGUOUS
	UID Field : Q8TDB6
	ROI Field : 561;564
	Splits
	- UID: Q8TDB6	ROI: 561
	- UID: Q8TDB6	ROI: 564
	File : lcr_VC2020.dat
	Orig Line : P28331 176;179 1.11 4 FALSE VC2022 elab
	Type : AMBIGUOUS
	UID Field : P28331
	ROI Field : 176;179
	Splits
	- UID: P28331	ROI: 176
	- UID: P28331	ROI: 179
	File : lcr_VC2020.dat
	Orig Line : Q86VP6 940;942 1.11 4 FALSE VC2022 elab
	Type : AMBIGUOUS
	UID Field : Q86VP6
	ROI Field : 940;942
	Splits
	- UID: Q86VP6	ROI: 940
	- UID: Q86VP6	ROI: 942
	File : lcr_VC2020.dat
	Orig Line : Q3LXA3 13;24 1.11 4 FALSE VC2022 elab
	Type : AMBIGUOUS
	UID Field : Q3LXA3
	ROI Field : 13;24
	Splits
	- UID: Q3LXA3	ROI: 13
	- UID: Q3LXA3	ROI: 24
	File : lcr_VC2020.dat
	Orig Line : O75643 1702;1706 1.11 4 FALSE VC2022 elab
	Type : AMBIGUOUS
	UID Field : O75643
	ROI Field : 1702;1706
	Splits
	- UID: O75643	ROI: 1702
	- UID: O75643	ROI: 1706
	File : lcr_VC2020.dat
	Orig Line : Q9HCS7 86;98 1.11 4 FALSE VC2022 elab
	Type : AMBIGUOUS
	UID Field : Q9HCS7
	ROI Field : 86;98
	Splits
	- UID: Q9HCS7	ROI: 86
	- UID: Q9HCS7	ROI: 98
	File : lcr_VC2020.dat
	Orig Line : Q15637 282;292 1.11 4 FALSE VC2022 elab
	Type : AMBIGUOUS
	UID Field : Q15637
	ROI Field : 282;292
	Splits
	- UID: Q15637	ROI: 282
	- UID: Q15637	ROI: 292
	File : lcr_VC2020.dat
	Orig Line : Q13263 221;224;229 1.11 4 FALSE VC2022 elab
	Type : AMBIGUOUS
	UID Field : Q13263
	ROI Field : 221;224;229
	Splits
	- UID: Q13263	ROI: 221
	- UID: Q13263	ROI: 224
	- UID: Q13263	ROI: 229
	File : lcr_VC2020.dat
	Orig Line : Q96KM6 752;756;757 1.11 4 FALSE VC2022 elab
	Type : AMBIGUOUS
	UID Field : Q96KM6
	ROI Field : 752;756;757
	Splits
	- UID: Q96KM6	ROI: 752
	- UID: Q96KM6	ROI: 756
	- UID: Q96KM6	ROI: 757
	File : lcr_VC2020.dat
	Orig Line : O43719 186;187 1.11 4 FALSE VC2022 elab
	Type : AMBIGUOUS
	UID Field : O43719
	ROI Field : 186;187
	Splits
	- UID: O43719	ROI: 186
	- UID: O43719	ROI: 187
	File : lcr_VC2020.dat
	Orig Line : Q7Z392 162;165 1.11 4 FALSE VC2022 elab
	Type : AMBIGUOUS
	UID Field : Q7Z392
	ROI Field : 162;165
	Splits
	- UID: Q7Z392	ROI: 162
	- UID: Q7Z392	ROI: 165
	File : lcr_VC2020.dat
	Orig Line : Q8TAT6 399;403 1.11 4 FALSE VC2022 elab
	Type : AMBIGUOUS
	UID Field : Q8TAT6
	ROI Field : 399;403
	Splits
	- UID: Q8TAT6	ROI: 399
	- UID: Q8TAT6	ROI: 403
	File : lcr_VC2020.dat
	Orig Line : O15117 519;520 1.11 4 FALSE VC2022 elab
	Type : AMBIGUOUS
	UID Field : O15117
	ROI Field : 519;520
	Splits
	- UID: O15117	ROI: 519
	- UID: O15117	ROI: 520
	File : lcr_VC2020.dat
	Orig Line : Q9NR45 46;50 1.11 4 FALSE VC2022 elab
	Type : AMBIGUOUS
	UID Field : Q9NR45
	ROI Field : 46;50
	Splits
	- UID: Q9NR45	ROI: 46
	- UID: Q9NR45	ROI: 50
	File : lcr_VC2020.dat
	Orig Line : Q14142 42;44;47 1.11 4 FALSE VC2022 elab
	Type : AMBIGUOUS
	UID Field : Q14142
	ROI Field : 42;44;47
	Splits
	- UID: Q14142	ROI: 42
	- UID: Q14142	ROI: 44
	- UID: Q14142	ROI: 47
	File : lcr_VC2020.dat
	Orig Line : Q96AX9 969;972 1.11 4 FALSE VC2022 elab
	Type : AMBIGUOUS
	UID Field : Q96AX9
	ROI Field : 969;972
	Splits
	- UID: Q96AX9	ROI: 969
	- UID: Q96AX9	ROI: 972
	File : lcr_VC2020.dat
	Orig Line : Q9BVS5 376;382 1.11 4 FALSE VC2022 elab
	Type : AMBIGUOUS
	UID Field : Q9BVS5
	ROI Field : 376;382
	Splits
	- UID: Q9BVS5	ROI: 376
	- UID: Q9BVS5	ROI: 382
	File : lcr_VC2020.dat
	Orig Line : Q9NPF5 381;384 1.11 4 FALSE VC2022 elab
	Type : AMBIGUOUS
	UID Field : Q9NPF5
	ROI Field : 381;384
	Splits
	- UID: Q9NPF5	ROI: 381
	- UID: Q9NPF5	ROI: 384
	File : lcr_VC2020.dat
	Orig Line : Q9ULM3 420;434 1.11 4 FALSE VC2022 elab
	Type : AMBIGUOUS
	UID Field : Q9ULM3
	ROI Field : 420;434
	Splits
	- UID: Q9ULM3	ROI: 420
	- UID: Q9ULM3	ROI: 434
	File : lcr_VC2020.dat
	Orig Line : Q9UBQ7 216;226 1.10 4 FALSE VC2022 elab
	Type : AMBIGUOUS
	UID Field : Q9UBQ7
	ROI Field : 216;226
	Splits
	- UID: Q9UBQ7	ROI: 216
	- UID: Q9UBQ7	ROI: 226
	File : lcr_VC2020.dat
	Orig Line : O76094 179;184 1.10 4 FALSE VC2022 elab
	Type : AMBIGUOUS
	UID Field : O76094
	ROI Field : 179;184
	Splits
	- UID: O76094	ROI: 179
	- UID: O76094	ROI: 184
	File : lcr_VC2020.dat
	Orig Line : Q7Z3K3 986;987 1.10 4 FALSE VC2022 elab
	Type : AMBIGUOUS
	UID Field : Q7Z3K3
	ROI Field : 986;987
	Splits
	- UID: Q7Z3K3	ROI: 986
	- UID: Q7Z3K3	ROI: 987
	File : lcr_VC2020.dat
	Orig Line : Q9Y5Q8 71;75 1.10 4 FALSE VC2022 elab
	Type : AMBIGUOUS
	UID Field : Q9Y5Q8
	ROI Field : 71;75
	Splits
	- UID: Q9Y5Q8	ROI: 71
	- UID: Q9Y5Q8	ROI: 75
	File : lcr_VC2020.dat
	Orig Line : Q9P0U4 564;566 1.10 4 FALSE VC2022 elab
	Type : AMBIGUOUS
	UID Field : Q9P0U4
	ROI Field : 564;566
	Splits
	- UID: Q9P0U4	ROI: 564
	- UID: Q9P0U4	ROI: 566
	File : lcr_VC2020.dat
	Orig Line : Q15628 135;138 1.10 4 FALSE VC2022 elab
	Type : AMBIGUOUS
	UID Field : Q15628
	ROI Field : 135;138
	Splits
	- UID: Q15628	ROI: 135
	- UID: Q15628	ROI: 138
	File : lcr_VC2020.dat
	Orig Line : P24928 1402;1407 1.10 4 FALSE VC2022 elab
	Type : AMBIGUOUS
	UID Field : P24928
	ROI Field : 1402;1407
	Splits
	- UID: P24928	ROI: 1402
	- UID: P24928	ROI: 1407
	File : lcr_VC2020.dat
	Orig Line : Q96CB9 196;197 1.10 4 FALSE VC2022 elab
	Type : AMBIGUOUS
	UID Field : Q96CB9
	ROI Field : 196;197
	Splits
	- UID: Q96CB9	ROI: 196
	- UID: Q96CB9	ROI: 197
	File : lcr_VC2020.dat
	Orig Line : P13489 273;277 1.10 4 FALSE VC2022 elab
	Type : AMBIGUOUS
	UID Field : P13489
	ROI Field : 273;277
	Splits
	- UID: P13489	ROI: 273
	- UID: P13489	ROI: 277
	File : lcr_VC2020.dat
	Orig Line : Q9UJX6 221;224 1.10 4 FALSE VC2022 elab
	Type : AMBIGUOUS
	UID Field : Q9UJX6
	ROI Field : 221;224
	Splits
	- UID: Q9UJX6	ROI: 221
	- UID: Q9UJX6	ROI: 224
	File : lcr_VC2020.dat
	Orig Line : P11274 608;609 1.10 4 FALSE VC2022 elab
	Type : AMBIGUOUS
	UID Field : P11274
	ROI Field : 608;609
	Splits
	- UID: P11274	ROI: 608
	- UID: P11274	ROI: 609
	File : lcr_VC2020.dat
	Orig Line : O60488 552;564 1.10 4 FALSE VC2022 elab
	Type : AMBIGUOUS
	UID Field : O60488
	ROI Field : 552;564
	Splits
	- UID: O60488	ROI: 552
	- UID: O60488	ROI: 564
	File : lcr_VC2020.dat
	Orig Line : Q9UJK0 283;284 1.10 4 FALSE VC2022 elab
	Type : AMBIGUOUS
	UID Field : Q9UJK0
	ROI Field : 283;284
	Splits
	- UID: Q9UJK0	ROI: 283
	- UID: Q9UJK0	ROI: 284
	File : lcr_VC2020.dat
	Orig Line : Q9BRZ2 181;184;189 1.10 4 FALSE VC2022 elab
	Type : AMBIGUOUS
	UID Field : Q9BRZ2
	ROI Field : 181;184;189
	Splits
	- UID: Q9BRZ2	ROI: 181
	- UID: Q9BRZ2	ROI: 184
	- UID: Q9BRZ2	ROI: 189
	File : lcr_VC2020.dat
	Orig Line : Q99543 384;394 1.10 4 FALSE VC2022 elab
	Type : AMBIGUOUS
	UID Field : Q99543
	ROI Field : 384;394
	Splits
	- UID: Q99543	ROI: 384
	- UID: Q99543	ROI: 394
	File : lcr_VC2020.dat
	Orig Line : P13489 152;159 1.10 4 FALSE VC2022 elab
	Type : AMBIGUOUS
	UID Field : P13489
	ROI Field : 152;159
	Splits
	- UID: P13489	ROI: 152
	- UID: P13489	ROI: 159
	File : lcr_VC2020.dat
	Orig Line : P61011 133;136 1.10 4 FALSE VC2022 elab
	Type : AMBIGUOUS
	UID Field : P61011
	ROI Field : 133;136
	Splits
	- UID: P61011	ROI: 133
	- UID: P61011	ROI: 136
	File : lcr_VC2020.dat
	Orig Line : P19367 368;375 1.10 4 FALSE VC2022 elab
	Type : AMBIGUOUS
	UID Field : P19367
	ROI Field : 368;375
	Splits
	- UID: P19367	ROI: 368
	- UID: P19367	ROI: 375
	File : lcr_VC2020.dat
	Orig Line : Q9Y4X5 276;281 1.10 4 FALSE VC2022 elab
	Type : AMBIGUOUS
	UID Field : Q9Y4X5
	ROI Field : 276;281
	Splits
	- UID: Q9Y4X5	ROI: 276
	- UID: Q9Y4X5	ROI: 281
	File : lcr_VC2020.dat
	Orig Line : Q5T4S7 3700;3703;3706 1.10 4 FALSE VC2022 elab
	Type : AMBIGUOUS
	UID Field : Q5T4S7
	ROI Field : 3700;3703;3706
	Splits
	- UID: Q5T4S7	ROI: 3700
	- UID: Q5T4S7	ROI: 3703
	- UID: Q5T4S7	ROI: 3706
	File : lcr_VC2020.dat
	Orig Line : P09234 6;9 1.10 4 FALSE VC2022 elab
	Type : AMBIGUOUS
	UID Field : P09234
	ROI Field : 6;9
	Splits
	- UID: P09234	ROI: 6
	- UID: P09234	ROI: 9
	File : lcr_VC2020.dat
	Orig Line : O75116 761;766 1.10 4 FALSE VC2022 elab
	Type : AMBIGUOUS
	UID Field : O75116
	ROI Field : 761;766
	Splits
	- UID: O75116	ROI: 761
	- UID: O75116	ROI: 766
	File : lcr_VC2020.dat
	Orig Line : Q8TCD5 165;166 1.10 4 FALSE VC2022 elab
	Type : AMBIGUOUS
	UID Field : Q8TCD5
	ROI Field : 165;166
	Splits
	- UID: Q8TCD5	ROI: 165
	- UID: Q8TCD5	ROI: 166
	File : lcr_VC2020.dat
	Orig Line : O43566 304;305 1.10 4 FALSE VC2022 elab
	Type : AMBIGUOUS
	UID Field : O43566
	ROI Field : 304;305
	Splits
	- UID: O43566	ROI: 304
	- UID: O43566	ROI: 305
	File : lcr_VC2020.dat
	Orig Line : Q63HN8 2229;2235 1.10 4 FALSE VC2022 elab
	Type : AMBIGUOUS
	UID Field : Q63HN8
	ROI Field : 2229;2235
	Splits
	- UID: Q63HN8	ROI: 2229
	- UID: Q63HN8	ROI: 2235
	File : lcr_VC2020.dat
	Orig Line : Q63HN8 3997;4000 1.10 4 FALSE VC2022 elab
	Type : AMBIGUOUS
	UID Field : Q63HN8
	ROI Field : 3997;4000
	Splits
	- UID: Q63HN8	ROI: 3997
	- UID: Q63HN8	ROI: 4000
	File : lcr_VC2020.dat
	Orig Line : Q9UKN8 814;817 1.10 4 FALSE VC2022 elab
	Type : AMBIGUOUS
	UID Field : Q9UKN8
	ROI Field : 814;817
	Splits
	- UID: Q9UKN8	ROI: 814
	- UID: Q9UKN8	ROI: 817
	File : lcr_VC2020.dat
	Orig Line : Q9Y2I7 191;192 1.10 4 FALSE VC2022 elab
	Type : AMBIGUOUS
	UID Field : Q9Y2I7
	ROI Field : 191;192
	Splits
	- UID: Q9Y2I7	ROI: 191
	- UID: Q9Y2I7	ROI: 192
	File : lcr_VC2020.dat
	Orig Line : Q06830 71;83 1.09 4 FALSE VC2022 elab
	Type : AMBIGUOUS
	UID Field : Q06830
	ROI Field : 71;83
	Splits
	- UID: Q06830	ROI: 71
	- UID: Q06830	ROI: 83
	File : lcr_VC2020.dat
	Orig Line : P68104 363;370;371 1.09 4 FALSE VC2022 elab
	Type : AMBIGUOUS
	UID Field : P68104
	ROI Field : 363;370;371
	Splits
	- UID: P68104	ROI: 363
	- UID: P68104	ROI: 370
	- UID: P68104	ROI: 371
	File : lcr_VC2020.dat
	Orig Line : P29597 965;966 1.09 4 FALSE VC2022 elab
	Type : AMBIGUOUS
	UID Field : P29597
	ROI Field : 965;966
	Splits
	- UID: P29597	ROI: 965
	- UID: P29597	ROI: 966
	File : lcr_VC2020.dat
	Orig Line : P19440 192;196 1.09 4 FALSE VC2022 elab
	Type : AMBIGUOUS
	UID Field : P19440
	ROI Field : 192;196
	Splits
	- UID: P19440	ROI: 192
	- UID: P19440	ROI: 196
	File : lcr_VC2020.dat
	Orig Line : O75170 769;777 1.09 4 FALSE VC2022 elab
	Type : AMBIGUOUS
	UID Field : O75170
	ROI Field : 769;777
	Splits
	- UID: O75170	ROI: 769
	- UID: O75170	ROI: 777
	File : lcr_VC2020.dat
	Orig Line : Q9Y3Z3 198;205 1.09 4 FALSE VC2022 elab
	Type : AMBIGUOUS
	UID Field : Q9Y3Z3
	ROI Field : 198;205
	Splits
	- UID: Q9Y3Z3	ROI: 198
	- UID: Q9Y3Z3	ROI: 205
	File : lcr_VC2020.dat
	Orig Line : O95671 456;461 1.09 4 FALSE VC2022 elab
	Type : AMBIGUOUS
	UID Field : O95671
	ROI Field : 456;461
	Splits
	- UID: O95671	ROI: 456
	- UID: O95671	ROI: 461
	File : lcr_VC2020.dat
	Orig Line : Q29RF7 581;583 1.09 4 FALSE VC2022 elab
	Type : AMBIGUOUS
	UID Field : Q29RF7
	ROI Field : 581;583
	Splits
	- UID: Q29RF7	ROI: 581
	- UID: Q29RF7	ROI: 583
	File : lcr_VC2020.dat
	Orig Line : Q9Y490 1661;1671 1.09 4 FALSE VC2022 elab
	Type : AMBIGUOUS
	UID Field : Q9Y490
	ROI Field : 1661;1671
	Splits
	- UID: Q9Y490	ROI: 1661
	- UID: Q9Y490	ROI: 1671
	File : lcr_VC2020.dat
	Orig Line : P19623 204;205;209 1.09 4 FALSE VC2022 elab
	Type : AMBIGUOUS
	UID Field : P19623
	ROI Field : 204;205;209
	Splits
	- UID: P19623	ROI: 204
	- UID: P19623	ROI: 205
	- UID: P19623	ROI: 209
	File : lcr_VC2020.dat
	Orig Line : P49327 2010;2024 1.09 4 FALSE VC2022 elab
	Type : AMBIGUOUS
	UID Field : P49327
	ROI Field : 2010;2024
	Splits
	- UID: P49327	ROI: 2010
	- UID: P49327	ROI: 2024
	File : lcr_VC2020.dat
	Orig Line : Q9HCS7 691;695 1.09 4 FALSE VC2022 elab
	Type : AMBIGUOUS
	UID Field : Q9HCS7
	ROI Field : 691;695
	Splits
	- UID: Q9HCS7	ROI: 691
	- UID: Q9HCS7	ROI: 695
	File : lcr_VC2020.dat
	Orig Line : O43592 674;676;683;693 1.09 4 FALSE VC2022 elab
	Type : AMBIGUOUS
	UID Field : O43592
	ROI Field : 674;676;683;693
	Splits
	- UID: O43592	ROI: 674
	- UID: O43592	ROI: 676
	- UID: O43592	ROI: 683
	- UID: O43592	ROI: 693
	File : lcr_VC2020.dat
	Orig Line : P17980 387;396 1.09 4 FALSE VC2022 elab
	Type : AMBIGUOUS
	UID Field : P17980
	ROI Field : 387;396
	Splits
	- UID: P17980	ROI: 387
	- UID: P17980	ROI: 396
	File : lcr_VC2020.dat
	Orig Line : Q08J23 673;678 1.09 4 FALSE VC2022 elab
	Type : AMBIGUOUS
	UID Field : Q08J23
	ROI Field : 673;678
	Splits
	- UID: Q08J23	ROI: 673
	- UID: Q08J23	ROI: 678
	File : lcr_VC2020.dat
	Orig Line : Q9NW64 81;84 1.09 4 FALSE VC2022 elab
	Type : AMBIGUOUS
	UID Field : Q9NW64
	ROI Field : 81;84
	Splits
	- UID: Q9NW64	ROI: 81
	- UID: Q9NW64	ROI: 84
	File : lcr_VC2020.dat
	Orig Line : P49023 582;585 1.09 4 FALSE VC2022 elab
	Type : AMBIGUOUS
	UID Field : P49023
	ROI Field : 582;585
	Splits
	- UID: P49023	ROI: 582
	- UID: P49023	ROI: 585
	File : lcr_VC2020.dat
	Orig Line : Q7Z2W4 162;168 1.09 4 FALSE VC2022 elab
	Type : AMBIGUOUS
	UID Field : Q7Z2W4
	ROI Field : 162;168
	Splits
	- UID: Q7Z2W4	ROI: 162
	- UID: Q7Z2W4	ROI: 168
	File : lcr_VC2020.dat
	Orig Line : P29590 57;60;61 1.09 4 FALSE VC2022 elab
	Type : AMBIGUOUS
	UID Field : P29590
	ROI Field : 57;60;61
	Splits
	- UID: P29590	ROI: 57
	- UID: P29590	ROI: 60
	- UID: P29590	ROI: 61
	File : lcr_VC2020.dat
	Orig Line : Q9H939 213;221 1.09 4 FALSE VC2022 elab
	Type : AMBIGUOUS
	UID Field : Q9H939
	ROI Field : 213;221
	Splits
	- UID: Q9H939	ROI: 213
	- UID: Q9H939	ROI: 221
	File : lcr_VC2020.dat
	Orig Line : Q9ULK4 225;238 1.09 4 FALSE VC2022 elab
	Type : AMBIGUOUS
	UID Field : Q9ULK4
	ROI Field : 225;238
	Splits
	- UID: Q9ULK4	ROI: 225
	- UID: Q9ULK4	ROI: 238
	File : lcr_VC2020.dat
	Orig Line : Q7RTV0 30;33;40;41 1.09 4 FALSE VC2022 elab
	Type : AMBIGUOUS
	UID Field : Q7RTV0
	ROI Field : 30;33;40;41
	Splits
	- UID: Q7RTV0	ROI: 30
	- UID: Q7RTV0	ROI: 33
	- UID: Q7RTV0	ROI: 40
	- UID: Q7RTV0	ROI: 41
	File : lcr_VC2020.dat
	Orig Line : Q7L5N1 264;266 1.09 4 FALSE VC2022 elab
	Type : AMBIGUOUS
	UID Field : Q7L5N1
	ROI Field : 264;266
	Splits
	- UID: Q7L5N1	ROI: 264
	- UID: Q7L5N1	ROI: 266
	File : lcr_VC2020.dat
	Orig Line : O43252 207;212 1.09 4 FALSE VC2022 elab
	Type : AMBIGUOUS
	UID Field : O43252
	ROI Field : 207;212
	Splits
	- UID: O43252	ROI: 207
	- UID: O43252	ROI: 212
	File : lcr_VC2020.dat
	Orig Line : Q6XZF7 73;75 1.09 4 FALSE VC2022 elab
	Type : AMBIGUOUS
	UID Field : Q6XZF7
	ROI Field : 73;75
	Splits
	- UID: Q6XZF7	ROI: 73
	- UID: Q6XZF7	ROI: 75
	File : lcr_VC2020.dat
	Orig Line : O95825 177;184 1.09 4 FALSE VC2022 elab
	Type : AMBIGUOUS
	UID Field : O95825
	ROI Field : 177;184
	Splits
	- UID: O95825	ROI: 177
	- UID: O95825	ROI: 184
	File : lcr_VC2020.dat
	Orig Line : P49792 2737;2740 1.09 4 FALSE VC2022 elab
	Type : AMBIGUOUS
	UID Field : P49792
	ROI Field : 2737;2740
	Splits
	- UID: P49792	ROI: 2737
	- UID: P49792	ROI: 2740
	File : lcr_VC2020.dat
	Orig Line : Q14119 76;79 1.09 4 FALSE VC2022 elab
	Type : AMBIGUOUS
	UID Field : Q14119
	ROI Field : 76;79
	Splits
	- UID: Q14119	ROI: 76
	- UID: Q14119	ROI: 79
	File : lcr_VC2020.dat
	Orig Line : Q8IXB1 728;735 1.09 4 FALSE VC2022 elab
	Type : AMBIGUOUS
	UID Field : Q8IXB1
	ROI Field : 728;735
	Splits
	- UID: Q8IXB1	ROI: 728
	- UID: Q8IXB1	ROI: 735
	File : lcr_VC2020.dat
	Orig Line : Q9HB58 149;152 1.09 4 FALSE VC2022 elab
	Type : AMBIGUOUS
	UID Field : Q9HB58
	ROI Field : 149;152
	Splits
	- UID: Q9HB58	ROI: 149
	- UID: Q9HB58	ROI: 152
	File : lcr_VC2020.dat
	Orig Line : Q86U86 1244;1257 1.08 4 FALSE VC2022 elab
	Type : AMBIGUOUS
	UID Field : Q86U86
	ROI Field : 1244;1257
	Splits
	- UID: Q86U86	ROI: 1244
	- UID: Q86U86	ROI: 1257
	File : lcr_VC2020.dat
	Orig Line : Q9Y263 664;666 1.08 4 FALSE VC2022 elab
	Type : AMBIGUOUS
	UID Field : Q9Y263
	ROI Field : 664;666
	Splits
	- UID: Q9Y263	ROI: 664
	- UID: Q9Y263	ROI: 666
	File : lcr_VC2020.dat
	Orig Line : Q96S99 178;183;186 1.08 4 FALSE VC2022 elab
	Type : AMBIGUOUS
	UID Field : Q96S99
	ROI Field : 178;183;186
	Splits
	- UID: Q96S99	ROI: 178
	- UID: Q96S99	ROI: 183
	- UID: Q96S99	ROI: 186
	File : lcr_VC2020.dat
	Orig Line : Q15020 812;821 1.08 4 FALSE VC2022 elab
	Type : AMBIGUOUS
	UID Field : Q15020
	ROI Field : 812;821
	Splits
	- UID: Q15020	ROI: 812
	- UID: Q15020	ROI: 821
	File : lcr_VC2020.dat
	Orig Line : Q15029 144;148 1.08 4 FALSE VC2022 elab
	Type : AMBIGUOUS
	UID Field : Q15029
	ROI Field : 144;148
	Splits
	- UID: Q15029	ROI: 144
	- UID: Q15029	ROI: 148
	File : lcr_VC2020.dat
	Orig Line : Q9H5N1 422;423 1.08 4 FALSE VC2022 elab
	Type : AMBIGUOUS
	UID Field : Q9H5N1
	ROI Field : 422;423
	Splits
	- UID: Q9H5N1	ROI: 422
	- UID: Q9H5N1	ROI: 423
	File : lcr_VC2020.dat
	Orig Line : Q9UBT2 432;441;444 1.08 4 FALSE VC2022 elab
	Type : AMBIGUOUS
	UID Field : Q9UBT2
	ROI Field : 432;441;444
	Splits
	- UID: Q9UBT2	ROI: 432
	- UID: Q9UBT2	ROI: 441
	- UID: Q9UBT2	ROI: 444
	File : lcr_VC2020.dat
	Orig Line : P15498 7;14 1.08 4 FALSE VC2022 elab
	Type : AMBIGUOUS
	UID Field : P15498
	ROI Field : 7;14
	Splits
	- UID: P15498	ROI: 7
	- UID: P15498	ROI: 14
	File : lcr_VC2020.dat
	Orig Line : P52209 170;171 1.08 4 FALSE VC2022 elab
	Type : AMBIGUOUS
	UID Field : P52209
	ROI Field : 170;171
	Splits
	- UID: P52209	ROI: 170
	- UID: P52209	ROI: 171
	File : lcr_VC2020.dat
	Orig Line : Q15286 110;114 1.08 4 FALSE VC2022 elab
	Type : AMBIGUOUS
	UID Field : Q15286
	ROI Field : 110;114
	Splits
	- UID: Q15286	ROI: 110
	- UID: Q15286	ROI: 114
	File : lcr_VC2020.dat
	Orig Line : Q9Y6K1 554;555 1.08 4 FALSE VC2022 elab
	Type : AMBIGUOUS
	UID Field : Q9Y6K1
	ROI Field : 554;555
	Splits
	- UID: Q9Y6K1	ROI: 554
	- UID: Q9Y6K1	ROI: 555
	File : lcr_VC2020.dat
	Orig Line : Q9Y5Z7 345;346 1.08 4 FALSE VC2022 elab
	Type : AMBIGUOUS
	UID Field : Q9Y5Z7
	ROI Field : 345;346
	Splits
	- UID: Q9Y5Z7	ROI: 345
	- UID: Q9Y5Z7	ROI: 346
	File : lcr_VC2020.dat
	Orig Line : P40938 164;165 1.08 4 FALSE VC2022 elab
	Type : AMBIGUOUS
	UID Field : P40938
	ROI Field : 164;165
	Splits
	- UID: P40938	ROI: 164
	- UID: P40938	ROI: 165
	File : lcr_VC2020.dat
	Orig Line : P49792 1372;1375 1.08 4 FALSE VC2022 elab
	Type : AMBIGUOUS
	UID Field : P49792
	ROI Field : 1372;1375
	Splits
	- UID: P49792	ROI: 1372
	- UID: P49792	ROI: 1375
	File : lcr_VC2020.dat
	Orig Line : Q09472 364;369 1.08 4 FALSE VC2022 elab
	Type : AMBIGUOUS
	UID Field : Q09472
	ROI Field : 364;369
	Splits
	- UID: Q09472	ROI: 364
	- UID: Q09472	ROI: 369
	File : lcr_VC2020.dat
	Orig Line : Q7Z478 643;648 1.08 4 FALSE VC2022 elab
	Type : AMBIGUOUS
	UID Field : Q7Z478
	ROI Field : 643;648
	Splits
	- UID: Q7Z478	ROI: 643
	- UID: Q7Z478	ROI: 648
	File : lcr_VC2020.dat
	Orig Line : Q9NWT1 232;237;239 1.08 4 FALSE VC2022 elab
	Type : AMBIGUOUS
	UID Field : Q9NWT1
	ROI Field : 232;237;239
	Splits
	- UID: Q9NWT1	ROI: 232
	- UID: Q9NWT1	ROI: 237
	- UID: Q9NWT1	ROI: 239
	File : lcr_VC2020.dat
	Orig Line : O00217 117;121 1.08 4 FALSE VC2022 elab
	Type : AMBIGUOUS
	UID Field : O00217
	ROI Field : 117;121
	Splits
	- UID: O00217	ROI: 117
	- UID: O00217	ROI: 121
	File : lcr_VC2020.dat
	Orig Line : Q658Y4 479;490 1.08 4 FALSE VC2022 elab
	Type : AMBIGUOUS
	UID Field : Q658Y4
	ROI Field : 479;490
	Splits
	- UID: Q658Y4	ROI: 479
	- UID: Q658Y4	ROI: 490
	File : lcr_VC2020.dat
	Orig Line : A2RTX5 333;340 1.08 4 FALSE VC2022 elab
	Type : AMBIGUOUS
	UID Field : A2RTX5
	ROI Field : 333;340
	Splits
	- UID: A2RTX5	ROI: 333
	- UID: A2RTX5	ROI: 340
	File : lcr_VC2020.dat
	Orig Line : A9YTQ3 648;650 1.08 4 FALSE VC2022 elab
	Type : AMBIGUOUS
	UID Field : A9YTQ3
	ROI Field : 648;650
	Splits
	- UID: A9YTQ3	ROI: 648
	- UID: A9YTQ3	ROI: 650
	File : lcr_VC2020.dat
	Orig Line : Q14202 570;574 1.08 4 FALSE VC2022 elab
	Type : AMBIGUOUS
	UID Field : Q14202
	ROI Field : 570;574
	Splits
	- UID: Q14202	ROI: 570
	- UID: Q14202	ROI: 574
	File : lcr_VC2020.dat
	Orig Line : Q6J9G0 121;125 1.08 4 FALSE VC2022 elab
	Type : AMBIGUOUS
	UID Field : Q6J9G0
	ROI Field : 121;125
	Splits
	- UID: Q6J9G0	ROI: 121
	- UID: Q6J9G0	ROI: 125
	File : lcr_VC2020.dat
	Orig Line : Q75N03 130;133 1.08 4 FALSE VC2022 elab
	Type : AMBIGUOUS
	UID Field : Q75N03
	ROI Field : 130;133
	Splits
	- UID: Q75N03	ROI: 130
	- UID: Q75N03	ROI: 133
	File : lcr_VC2020.dat
	Orig Line : Q8IXH7 397;398 1.08 4 FALSE VC2022 elab
	Type : AMBIGUOUS
	UID Field : Q8IXH7
	ROI Field : 397;398
	Splits
	- UID: Q8IXH7	ROI: 397
	- UID: Q8IXH7	ROI: 398
	File : lcr_VC2020.dat
	Orig Line : Q8NEZ2 373;375 1.08 4 FALSE VC2022 elab
	Type : AMBIGUOUS
	UID Field : Q8NEZ2
	ROI Field : 373;375
	Splits
	- UID: Q8NEZ2	ROI: 373
	- UID: Q8NEZ2	ROI: 375
	File : lcr_VC2020.dat
	Orig Line : Q93008 2238;2239 1.08 4 FALSE VC2022 elab
	Type : AMBIGUOUS
	UID Field : Q93008
	ROI Field : 2238;2239
	Splits
	- UID: Q93008	ROI: 2238
	- UID: Q93008	ROI: 2239
	File : lcr_VC2020.dat
	Orig Line : Q15084 190;193 1.07 4 FALSE VC2022 elab
	Type : AMBIGUOUS
	UID Field : Q15084
	ROI Field : 190;193
	Splits
	- UID: Q15084	ROI: 190
	- UID: Q15084	ROI: 193
	File : lcr_VC2020.dat
	Orig Line : P50851 1455;1458 1.07 4 FALSE VC2022 elab
	Type : AMBIGUOUS
	UID Field : P50851
	ROI Field : 1455;1458
	Splits
	- UID: P50851	ROI: 1455
	- UID: P50851	ROI: 1458
	File : lcr_VC2020.dat
	Orig Line : Q14C86 70;71 1.07 4 FALSE VC2022 elab
	Type : AMBIGUOUS
	UID Field : Q14C86
	ROI Field : 70;71
	Splits
	- UID: Q14C86	ROI: 70
	- UID: Q14C86	ROI: 71
	File : lcr_VC2020.dat
	Orig Line : Q9UHD2 423;426 1.07 4 FALSE VC2022 elab
	Type : AMBIGUOUS
	UID Field : Q9UHD2
	ROI Field : 423;426
	Splits
	- UID: Q9UHD2	ROI: 423
	- UID: Q9UHD2	ROI: 426
	File : lcr_VC2020.dat
	Orig Line : Q86XP3 339;346 1.07 4 FALSE VC2022 elab
	Type : AMBIGUOUS
	UID Field : Q86XP3
	ROI Field : 339;346
	Splits
	- UID: Q86XP3	ROI: 339
	- UID: Q86XP3	ROI: 346
	File : lcr_VC2020.dat
	Orig Line : P49792 1626;1629;1685;1688 1.07 4 FALSE VC2022 elab
	Type : AMBIGUOUS
	UID Field : P49792
	ROI Field : 1626;1629;1685;1688
	Splits
	- UID: P49792	ROI: 1626
	- UID: P49792	ROI: 1629
	- UID: P49792	ROI: 1685
	- UID: P49792	ROI: 1688
	File : lcr_VC2020.dat
	Orig Line : Q15149 4245;4254 1.07 4 FALSE VC2022 elab
	Type : AMBIGUOUS
	UID Field : Q15149
	ROI Field : 4245;4254
	Splits
	- UID: Q15149	ROI: 4245
	- UID: Q15149	ROI: 4254
	File : lcr_VC2020.dat
	Orig Line : Q96ME7 408;413 1.07 4 FALSE VC2022 elab
	Type : AMBIGUOUS
	UID Field : Q96ME7
	ROI Field : 408;413
	Splits
	- UID: Q96ME7	ROI: 408
	- UID: Q96ME7	ROI: 413
	File : lcr_VC2020.dat
	Orig Line : P49590 173;175 1.07 4 FALSE VC2022 elab
	Type : AMBIGUOUS
	UID Field : P49590
	ROI Field : 173;175
	Splits
	- UID: P49590	ROI: 173
	- UID: P49590	ROI: 175
	File : lcr_VC2020.dat
	Orig Line : Q8IWB1 255;257 1.07 4 FALSE VC2022 elab
	Type : AMBIGUOUS
	UID Field : Q8IWB1
	ROI Field : 255;257
	Splits
	- UID: Q8IWB1	ROI: 255
	- UID: Q8IWB1	ROI: 257
	File : lcr_VC2020.dat
	Orig Line : Q969S3 305;308 1.07 4 FALSE VC2022 elab
	Type : AMBIGUOUS
	UID Field : Q969S3
	ROI Field : 305;308
	Splits
	- UID: Q969S3	ROI: 305
	- UID: Q969S3	ROI: 308
	File : lcr_VC2020.dat
	Orig Line : Q14683 613;619 1.07 4 FALSE VC2022 elab
	Type : AMBIGUOUS
	UID Field : Q14683
	ROI Field : 613;619
	Splits
	- UID: Q14683	ROI: 613
	- UID: Q14683	ROI: 619
	File : lcr_VC2020.dat
	Orig Line : Q9UKF7 136;142 1.07 4 FALSE VC2022 elab
	Type : AMBIGUOUS
	UID Field : Q9UKF7
	ROI Field : 136;142
	Splits
	- UID: Q9UKF7	ROI: 136
	- UID: Q9UKF7	ROI: 142
	File : lcr_VC2020.dat
	Orig Line : Q9BV20 127;128 1.07 4 FALSE VC2022 elab
	Type : AMBIGUOUS
	UID Field : Q9BV20
	ROI Field : 127;128
	Splits
	- UID: Q9BV20	ROI: 127
	- UID: Q9BV20	ROI: 128
	File : lcr_VC2020.dat
	Orig Line : Q16181 160;161 1.07 4 FALSE VC2022 elab
	Type : AMBIGUOUS
	UID Field : Q16181
	ROI Field : 160;161
	Splits
	- UID: Q16181	ROI: 160
	- UID: Q16181	ROI: 161
	File : lcr_VC2020.dat
	Orig Line : Q684P5 443;444 1.07 4 FALSE VC2022 elab
	Type : AMBIGUOUS
	UID Field : Q684P5
	ROI Field : 443;444
	Splits
	- UID: Q684P5	ROI: 443
	- UID: Q684P5	ROI: 444
	File : lcr_VC2020.dat
	Orig Line : P43250 420;425 1.07 4 FALSE VC2022 elab
	Type : AMBIGUOUS
	UID Field : P43250
	ROI Field : 420;425
	Splits
	- UID: P43250	ROI: 420
	- UID: P43250	ROI: 425
	File : lcr_VC2020.dat
	Orig Line : Q7Z333 133;138 1.07 4 FALSE VC2022 elab
	Type : AMBIGUOUS
	UID Field : Q7Z333
	ROI Field : 133;138
	Splits
	- UID: Q7Z333	ROI: 133
	- UID: Q7Z333	ROI: 138
	File : lcr_VC2020.dat
	Orig Line : Q9H0P0 106;113 1.07 4 FALSE VC2022 elab
	Type : AMBIGUOUS
	UID Field : Q9H0P0
	ROI Field : 106;113
	Splits
	- UID: Q9H0P0	ROI: 106
	- UID: Q9H0P0	ROI: 113
	File : lcr_VC2020.dat
	Orig Line : Q9Y6D6 1524;1526 1.07 4 FALSE VC2022 elab
	Type : AMBIGUOUS
	UID Field : Q9Y6D6
	ROI Field : 1524;1526
	Splits
	- UID: Q9Y6D6	ROI: 1524
	- UID: Q9Y6D6	ROI: 1526
	File : lcr_VC2020.dat
	Orig Line : P78316 750;755 1.06 4 FALSE VC2022 elab
	Type : AMBIGUOUS
	UID Field : P78316
	ROI Field : 750;755
	Splits
	- UID: P78316	ROI: 750
	- UID: P78316	ROI: 755
	File : lcr_VC2020.dat
	Orig Line : Q9NRY4 559;562 1.06 4 FALSE VC2022 elab
	Type : AMBIGUOUS
	UID Field : Q9NRY4
	ROI Field : 559;562
	Splits
	- UID: Q9NRY4	ROI: 559
	- UID: Q9NRY4	ROI: 562
	File : lcr_VC2020.dat
	Orig Line : Q15650 171;173 1.06 4 FALSE VC2022 elab
	Type : AMBIGUOUS
	UID Field : Q15650
	ROI Field : 171;173
	Splits
	- UID: Q15650	ROI: 171
	- UID: Q15650	ROI: 173
	File : lcr_VC2020.dat
	Orig Line : Q9Y2B0 28;31 1.06 4 FALSE VC2022 elab
	Type : AMBIGUOUS
	UID Field : Q9Y2B0
	ROI Field : 28;31
	Splits
	- UID: Q9Y2B0	ROI: 28
	- UID: Q9Y2B0	ROI: 31
	File : lcr_VC2020.dat
	Orig Line : O75691 616;618 1.06 4 FALSE VC2022 elab
	Type : AMBIGUOUS
	UID Field : O75691
	ROI Field : 616;618
	Splits
	- UID: O75691	ROI: 616
	- UID: O75691	ROI: 618
	File : lcr_VC2020.dat
	Orig Line : Q9Y2H0 822;823 1.06 4 FALSE VC2022 elab
	Type : AMBIGUOUS
	UID Field : Q9Y2H0
	ROI Field : 822;823
	Splits
	- UID: Q9Y2H0	ROI: 822
	- UID: Q9Y2H0	ROI: 823
	File : lcr_VC2020.dat
	Orig Line : Q9UFC0 449;454 1.06 4 FALSE VC2022 elab
	Type : AMBIGUOUS
	UID Field : Q9UFC0
	ROI Field : 449;454
	Splits
	- UID: Q9UFC0	ROI: 449
	- UID: Q9UFC0	ROI: 454
	File : lcr_VC2020.dat
	Orig Line : Q09161 477;483 1.06 4 FALSE VC2022 elab
	Type : AMBIGUOUS
	UID Field : Q09161
	ROI Field : 477;483
	Splits
	- UID: Q09161	ROI: 477
	- UID: Q09161	ROI: 483
	File : lcr_VC2020.dat
	Orig Line : Q08211 773;777 1.06 4 FALSE VC2022 elab
	Type : AMBIGUOUS
	UID Field : Q08211
	ROI Field : 773;777
	Splits
	- UID: Q08211	ROI: 773
	- UID: Q08211	ROI: 777
	File : lcr_VC2020.dat
	Orig Line : Q9P2I0 577;578 1.06 4 FALSE VC2022 elab
	Type : AMBIGUOUS
	UID Field : Q9P2I0
	ROI Field : 577;578
	Splits
	- UID: Q9P2I0	ROI: 577
	- UID: Q9P2I0	ROI: 578
	File : lcr_VC2020.dat
	Orig Line : Q9UFC0 76;88 1.06 4 FALSE VC2022 elab
	Type : AMBIGUOUS
	UID Field : Q9UFC0
	ROI Field : 76;88
	Splits
	- UID: Q9UFC0	ROI: 76
	- UID: Q9UFC0	ROI: 88
	File : lcr_VC2020.dat
	Orig Line : P62873 148;149 1.06 4 FALSE VC2022 elab
	Type : AMBIGUOUS
	UID Field : P62873
	ROI Field : 148;149
	Splits
	- UID: P62873	ROI: 148
	- UID: P62873	ROI: 149
	File : lcr_VC2020.dat
	Orig Line : Q06265 115;122 1.06 4 FALSE VC2022 elab
	Type : AMBIGUOUS
	UID Field : Q06265
	ROI Field : 115;122
	Splits
	- UID: Q06265	ROI: 115
	- UID: Q06265	ROI: 122
	File : lcr_VC2020.dat
	Orig Line : Q12933 107;112 1.06 4 FALSE VC2022 elab
	Type : AMBIGUOUS
	UID Field : Q12933
	ROI Field : 107;112
	Splits
	- UID: Q12933	ROI: 107
	- UID: Q12933	ROI: 112
	File : lcr_VC2020.dat
	Orig Line : Q9BRQ0 346;350 1.06 4 FALSE VC2022 elab
	Type : AMBIGUOUS
	UID Field : Q9BRQ0
	ROI Field : 346;350
	Splits
	- UID: Q9BRQ0	ROI: 346
	- UID: Q9BRQ0	ROI: 350
	File : lcr_VC2020.dat
	Orig Line : P42345 1497;1498 1.06 4 FALSE VC2022 elab
	Type : AMBIGUOUS
	UID Field : P42345
	ROI Field : 1497;1498
	Splits
	- UID: P42345	ROI: 1497
	- UID: P42345	ROI: 1498
	File : lcr_VC2020.dat
	Orig Line : P29590 132;140;143 1.06 4 FALSE VC2022 elab
	Type : AMBIGUOUS
	UID Field : P29590
	ROI Field : 132;140;143
	Splits
	- UID: P29590	ROI: 132
	- UID: P29590	ROI: 140
	- UID: P29590	ROI: 143
	File : lcr_VC2020.dat
	Orig Line : Q86UK7 32;33 1.06 4 FALSE VC2022 elab
	Type : AMBIGUOUS
	UID Field : Q86UK7
	ROI Field : 32;33
	Splits
	- UID: Q86UK7	ROI: 32
	- UID: Q86UK7	ROI: 33
	File : lcr_VC2020.dat
	Orig Line : Q9H0F6 275;277 1.06 4 FALSE VC2022 elab
	Type : AMBIGUOUS
	UID Field : Q9H0F6
	ROI Field : 275;277
	Splits
	- UID: Q9H0F6	ROI: 275
	- UID: Q9H0F6	ROI: 277
	File : lcr_VC2020.dat
	Orig Line : P49792 1499;1502 1.06 4 FALSE VC2022 elab
	Type : AMBIGUOUS
	UID Field : P49792
	ROI Field : 1499;1502
	Splits
	- UID: P49792	ROI: 1499
	- UID: P49792	ROI: 1502
	File : lcr_VC2020.dat
	Orig Line : Q9NX24 92;98 1.06 4 FALSE VC2022 elab
	Type : AMBIGUOUS
	UID Field : Q9NX24
	ROI Field : 92;98
	Splits
	- UID: Q9NX24	ROI: 92
	- UID: Q9NX24	ROI: 98
	File : lcr_VC2020.dat
	Orig Line : Q9GZN8 124;131 1.05 4 FALSE VC2022 elab
	Type : AMBIGUOUS
	UID Field : Q9GZN8
	ROI Field : 124;131
	Splits
	- UID: Q9GZN8	ROI: 124
	- UID: Q9GZN8	ROI: 131
	File : lcr_VC2020.dat
	Orig Line : P14868 257;259 1.05 4 FALSE VC2022 elab
	Type : AMBIGUOUS
	UID Field : P14868
	ROI Field : 257;259
	Splits
	- UID: P14868	ROI: 257
	- UID: P14868	ROI: 259
	File : lcr_VC2020.dat
	Orig Line : O43719 462;471 1.05 4 FALSE VC2022 elab
	Type : AMBIGUOUS
	UID Field : O43719
	ROI Field : 462;471
	Splits
	- UID: O43719	ROI: 462
	- UID: O43719	ROI: 471
	File : lcr_VC2020.dat
	Orig Line : Q96HE7 99;104;105 1.05 4 FALSE VC2022 elab
	Type : AMBIGUOUS
	UID Field : Q96HE7
	ROI Field : 99;104;105
	Splits
	- UID: Q96HE7	ROI: 99
	- UID: Q96HE7	ROI: 104
	- UID: Q96HE7	ROI: 105
	File : lcr_VC2020.dat
	Orig Line : Q8WVV9 234;235 1.05 4 FALSE VC2022 elab
	Type : AMBIGUOUS
	UID Field : Q8WVV9
	ROI Field : 234;235
	Splits
	- UID: Q8WVV9	ROI: 234
	- UID: Q8WVV9	ROI: 235
	File : lcr_VC2020.dat
	Orig Line : Q9Y4A5 1699;1704 1.05 4 FALSE VC2022 elab
	Type : AMBIGUOUS
	UID Field : Q9Y4A5
	ROI Field : 1699;1704
	Splits
	- UID: Q9Y4A5	ROI: 1699
	- UID: Q9Y4A5	ROI: 1704
	File : lcr_VC2020.dat
	Orig Line : P11177 161;169 1.05 4 FALSE VC2022 elab
	Type : AMBIGUOUS
	UID Field : P11177
	ROI Field : 161;169
	Splits
	- UID: P11177	ROI: 161
	- UID: P11177	ROI: 169
	File : lcr_VC2020.dat
	Orig Line : Q9UBD5 440;442 1.05 4 FALSE VC2022 elab
	Type : AMBIGUOUS
	UID Field : Q9UBD5
	ROI Field : 440;442
	Splits
	- UID: Q9UBD5	ROI: 440
	- UID: Q9UBD5	ROI: 442
	File : lcr_VC2020.dat
	Orig Line : O60341 618;623 1.05 4 FALSE VC2022 elab
	Type : AMBIGUOUS
	UID Field : O60341
	ROI Field : 618;623
	Splits
	- UID: O60341	ROI: 618
	- UID: O60341	ROI: 623
	File : lcr_VC2020.dat
	Orig Line : P22234 288;295 1.05 4 FALSE VC2022 elab
	Type : AMBIGUOUS
	UID Field : P22234
	ROI Field : 288;295
	Splits
	- UID: P22234	ROI: 288
	- UID: P22234	ROI: 295
	File : lcr_VC2020.dat
	Orig Line : Q15149 3008;3017 1.05 4 FALSE VC2022 elab
	Type : AMBIGUOUS
	UID Field : Q15149
	ROI Field : 3008;3017
	Splits
	- UID: Q15149	ROI: 3008
	- UID: Q15149	ROI: 3017
	File : lcr_VC2020.dat
	Orig Line : Q8IWB7 317;322 1.05 4 FALSE VC2022 elab
	Type : AMBIGUOUS
	UID Field : Q8IWB7
	ROI Field : 317;322
	Splits
	- UID: Q8IWB7	ROI: 317
	- UID: Q8IWB7	ROI: 322
	File : lcr_VC2020.dat
	Orig Line : P23381 305;309 1.05 4 FALSE VC2022 elab
	Type : AMBIGUOUS
	UID Field : P23381
	ROI Field : 305;309
	Splits
	- UID: P23381	ROI: 305
	- UID: P23381	ROI: 309
	File : lcr_VC2020.dat
	Orig Line : Q6GPH4 172;173 1.05 4 FALSE VC2022 elab
	Type : AMBIGUOUS
	UID Field : Q6GPH4
	ROI Field : 172;173
	Splits
	- UID: Q6GPH4	ROI: 172
	- UID: Q6GPH4	ROI: 173
	File : lcr_VC2020.dat
	Orig Line : P62879 114;121 1.05 4 FALSE VC2022 elab
	Type : AMBIGUOUS
	UID Field : P62879
	ROI Field : 114;121
	Splits
	- UID: P62879	ROI: 114
	- UID: P62879	ROI: 121
	File : lcr_VC2020.dat
	Orig Line : Q9UK59 339;347 1.05 4 FALSE VC2022 elab
	Type : AMBIGUOUS
	UID Field : Q9UK59
	ROI Field : 339;347
	Splits
	- UID: Q9UK59	ROI: 339
	- UID: Q9UK59	ROI: 347
	File : lcr_VC2020.dat
	Orig Line : P22314 1039;1040 1.05 4 FALSE VC2022 elab
	Type : AMBIGUOUS
	UID Field : P22314
	ROI Field : 1039;1040
	Splits
	- UID: P22314	ROI: 1039
	- UID: P22314	ROI: 1040
	File : lcr_VC2020.dat
	Orig Line : O94762 261;266 1.05 4 FALSE VC2022 elab
	Type : AMBIGUOUS
	UID Field : O94762
	ROI Field : 261;266
	Splits
	- UID: O94762	ROI: 261
	- UID: O94762	ROI: 266
	File : lcr_VC2020.dat
	Orig Line : P46939 3094;3097 1.05 4 FALSE VC2022 elab
	Type : AMBIGUOUS
	UID Field : P46939
	ROI Field : 3094;3097
	Splits
	- UID: P46939	ROI: 3094
	- UID: P46939	ROI: 3097
	File : lcr_VC2020.dat
	Orig Line : Q96AX9 151;152 1.05 4 FALSE VC2022 elab
	Type : AMBIGUOUS
	UID Field : Q96AX9
	ROI Field : 151;152
	Splits
	- UID: Q96AX9	ROI: 151
	- UID: Q96AX9	ROI: 152
	File : lcr_VC2020.dat
	Orig Line : Q96HC4 467;470 1.05 4 FALSE VC2022 elab
	Type : AMBIGUOUS
	UID Field : Q96HC4
	ROI Field : 467;470
	Splits
	- UID: Q96HC4	ROI: 467
	- UID: Q96HC4	ROI: 470
	File : lcr_VC2020.dat
	Orig Line : Q9ULV3 595;598 1.05 4 FALSE VC2022 elab
	Type : AMBIGUOUS
	UID Field : Q9ULV3
	ROI Field : 595;598
	Splits
	- UID: Q9ULV3	ROI: 595
	- UID: Q9ULV3	ROI: 598
	File : lcr_VC2020.dat
	Orig Line : A0AVT1 449;455 1.04 4 FALSE VC2022 elab
	Type : AMBIGUOUS
	UID Field : A0AVT1
	ROI Field : 449;455
	Splits
	- UID: A0AVT1	ROI: 449
	- UID: A0AVT1	ROI: 455
	File : lcr_VC2020.dat
	Orig Line : O00139 525;537 1.04 4 FALSE VC2022 elab
	Type : AMBIGUOUS
	UID Field : O00139
	ROI Field : 525;537
	Splits
	- UID: O00139	ROI: 525
	- UID: O00139	ROI: 537
	File : lcr_VC2020.dat
	Orig Line : P11388 997;1008 1.04 4 FALSE VC2022 elab
	Type : AMBIGUOUS
	UID Field : P11388
	ROI Field : 997;1008
	Splits
	- UID: P11388	ROI: 997
	- UID: P11388	ROI: 1008
	File : lcr_VC2020.dat
	Orig Line : O43396 135;137;149 1.04 4 FALSE VC2022 elab
	Type : AMBIGUOUS
	UID Field : O43396
	ROI Field : 135;137;149
	Splits
	- UID: O43396	ROI: 135
	- UID: O43396	ROI: 137
	- UID: O43396	ROI: 149
	File : lcr_VC2020.dat
	Orig Line : Q9BTE1 149;160 1.04 4 FALSE VC2022 elab
	Type : AMBIGUOUS
	UID Field : Q9BTE1
	ROI Field : 149;160
	Splits
	- UID: Q9BTE1	ROI: 149
	- UID: Q9BTE1	ROI: 160
	File : lcr_VC2020.dat
	Orig Line : Q9Y2Q9 122;124 1.04 4 FALSE VC2022 elab
	Type : AMBIGUOUS
	UID Field : Q9Y2Q9
	ROI Field : 122;124
	Splits
	- UID: Q9Y2Q9	ROI: 122
	- UID: Q9Y2Q9	ROI: 124
	File : lcr_VC2020.dat
	Orig Line : Q8IU81 12;15 1.04 4 FALSE VC2022 elab
	Type : AMBIGUOUS
	UID Field : Q8IU81
	ROI Field : 12;15
	Splits
	- UID: Q8IU81	ROI: 12
	- UID: Q8IU81	ROI: 15
	File : lcr_VC2020.dat
	Orig Line : Q13315 786;790 1.04 4 FALSE VC2022 elab
	Type : AMBIGUOUS
	UID Field : Q13315
	ROI Field : 786;790
	Splits
	- UID: Q13315	ROI: 786
	- UID: Q13315	ROI: 790
	File : lcr_VC2020.dat
	Orig Line : P55010 99;102 1.04 4 FALSE VC2022 elab
	Type : AMBIGUOUS
	UID Field : P55010
	ROI Field : 99;102
	Splits
	- UID: P55010	ROI: 99
	- UID: P55010	ROI: 102
	File : lcr_VC2020.dat
	Orig Line : Q15057 407;414;415;417 1.04 4 FALSE VC2022 elab
	Type : AMBIGUOUS
	UID Field : Q15057
	ROI Field : 407;414;415;417
	Splits
	- UID: Q15057	ROI: 407
	- UID: Q15057	ROI: 414
	- UID: Q15057	ROI: 415
	- UID: Q15057	ROI: 417
	File : lcr_VC2020.dat
	Orig Line : O14976 524;526 1.04 4 FALSE VC2022 elab
	Type : AMBIGUOUS
	UID Field : O14976
	ROI Field : 524;526
	Splits
	- UID: O14976	ROI: 524
	- UID: O14976	ROI: 526
	File : lcr_VC2020.dat
	Orig Line : O43426 383;386 1.04 4 FALSE VC2022 elab
	Type : AMBIGUOUS
	UID Field : O43426
	ROI Field : 383;386
	Splits
	- UID: O43426	ROI: 383
	- UID: O43426	ROI: 386
	File : lcr_VC2020.dat
	Orig Line : Q13574 59;63 1.04 4 FALSE VC2022 elab
	Type : AMBIGUOUS
	UID Field : Q13574
	ROI Field : 59;63
	Splits
	- UID: Q13574	ROI: 59
	- UID: Q13574	ROI: 63
	File : lcr_VC2020.dat
	Orig Line : Q16254 136;146 1.04 4 FALSE VC2022 elab
	Type : AMBIGUOUS
	UID Field : Q16254
	ROI Field : 136;146
	Splits
	- UID: Q16254	ROI: 136
	- UID: Q16254	ROI: 146
	File : lcr_VC2020.dat
	Orig Line : Q6R327 893;906 1.04 4 FALSE VC2022 elab
	Type : AMBIGUOUS
	UID Field : Q6R327
	ROI Field : 893;906
	Splits
	- UID: Q6R327	ROI: 893
	- UID: Q6R327	ROI: 906
	File : lcr_VC2020.dat
	Orig Line : Q13049 509;511 1.03 4 FALSE VC2022 elab
	Type : AMBIGUOUS
	UID Field : Q13049
	ROI Field : 509;511
	Splits
	- UID: Q13049	ROI: 509
	- UID: Q13049	ROI: 511
	File : lcr_VC2020.dat
	Orig Line : P49821 238;255 1.03 4 FALSE VC2022 elab
	Type : AMBIGUOUS
	UID Field : P49821
	ROI Field : 238;255
	Splits
	- UID: P49821	ROI: 238
	- UID: P49821	ROI: 255
	File : lcr_VC2020.dat
	Orig Line : P13489 305;313 1.03 4 FALSE VC2022 elab
	Type : AMBIGUOUS
	UID Field : P13489
	ROI Field : 305;313
	Splits
	- UID: P13489	ROI: 305
	- UID: P13489	ROI: 313
	File : lcr_VC2020.dat
	Orig Line : Q9NR56 27;34;35 1.03 4 FALSE VC2022 elab
	Type : AMBIGUOUS
	UID Field : Q9NR56
	ROI Field : 27;34;35
	Splits
	- UID: Q9NR56	ROI: 27
	- UID: Q9NR56	ROI: 34
	- UID: Q9NR56	ROI: 35
	File : lcr_VC2020.dat
	Orig Line : O14975 149;150 1.03 4 FALSE VC2022 elab
	Type : AMBIGUOUS
	UID Field : O14975
	ROI Field : 149;150
	Splits
	- UID: O14975	ROI: 149
	- UID: O14975	ROI: 150
	File : lcr_VC2020.dat
	Orig Line : Q9H6S0 1051;1052;1064 1.03 4 FALSE VC2022 elab
	Type : AMBIGUOUS
	UID Field : Q9H6S0
	ROI Field : 1051;1052;1064
	Splits
	- UID: Q9H6S0	ROI: 1051
	- UID: Q9H6S0	ROI: 1052
	- UID: Q9H6S0	ROI: 1064
	File : lcr_VC2020.dat
	Orig Line : O00478 383;387 1.03 4 FALSE VC2022 elab
	Type : AMBIGUOUS
	UID Field : O00478
	ROI Field : 383;387
	Splits
	- UID: O00478	ROI: 383
	- UID: O00478	ROI: 387
	File : lcr_VC2020.dat
	Orig Line : Q9NTJ5 389;392 1.03 4 FALSE VC2022 elab
	Type : AMBIGUOUS
	UID Field : Q9NTJ5
	ROI Field : 389;392
	Splits
	- UID: Q9NTJ5	ROI: 389
	- UID: Q9NTJ5	ROI: 392
	File : lcr_VC2020.dat
	Orig Line : P30260 66;71 1.03 4 FALSE VC2022 elab
	Type : AMBIGUOUS
	UID Field : P30260
	ROI Field : 66;71
	Splits
	- UID: P30260	ROI: 66
	- UID: P30260	ROI: 71
	File : lcr_VC2020.dat
	Orig Line : Q8NF50 521;522 1.03 4 FALSE VC2022 elab
	Type : AMBIGUOUS
	UID Field : Q8NF50
	ROI Field : 521;522
	Splits
	- UID: Q8NF50	ROI: 521
	- UID: Q8NF50	ROI: 522
	File : lcr_VC2020.dat
	Orig Line : Q96KR1 587;589 1.03 4 FALSE VC2022 elab
	Type : AMBIGUOUS
	UID Field : Q96KR1
	ROI Field : 587;589
	Splits
	- UID: Q96KR1	ROI: 587
	- UID: Q96KR1	ROI: 589
	File : lcr_VC2020.dat
	Orig Line : P49790 871;874 1.03 4 FALSE VC2022 elab
	Type : AMBIGUOUS
	UID Field : P49790
	ROI Field : 871;874
	Splits
	- UID: P49790	ROI: 871
	- UID: P49790	ROI: 874
	File : lcr_VC2020.dat
	Orig Line : Q9UBS8 262;265 1.03 4 FALSE VC2022 elab
	Type : AMBIGUOUS
	UID Field : Q9UBS8
	ROI Field : 262;265
	Splits
	- UID: Q9UBS8	ROI: 262
	- UID: Q9UBS8	ROI: 265
	File : lcr_VC2020.dat
	Orig Line : P24386 564;580 1.03 4 FALSE VC2022 elab
	Type : AMBIGUOUS
	UID Field : P24386
	ROI Field : 564;580
	Splits
	- UID: P24386	ROI: 564
	- UID: P24386	ROI: 580
	File : lcr_VC2020.dat
	Orig Line : Q9Y4X5 304;307 1.03 4 FALSE VC2022 elab
	Type : AMBIGUOUS
	UID Field : Q9Y4X5
	ROI Field : 304;307
	Splits
	- UID: Q9Y4X5	ROI: 304
	- UID: Q9Y4X5	ROI: 307
	File : lcr_VC2020.dat
	Orig Line : Q8TB24 906;909 1.03 4 FALSE VC2022 elab
	Type : AMBIGUOUS
	UID Field : Q8TB24
	ROI Field : 906;909
	Splits
	- UID: Q8TB24	ROI: 906
	- UID: Q8TB24	ROI: 909
	File : lcr_VC2020.dat
	Orig Line : Q69YN4 1559;1560 1.02 4 FALSE VC2022 elab
	Type : AMBIGUOUS
	UID Field : Q69YN4
	ROI Field : 1559;1560
	Splits
	- UID: Q69YN4	ROI: 1559
	- UID: Q69YN4	ROI: 1560
	File : lcr_VC2020.dat
	Orig Line : Q9UK41 60;70 1.02 4 FALSE VC2022 elab
	Type : AMBIGUOUS
	UID Field : Q9UK41
	ROI Field : 60;70
	Splits
	- UID: Q9UK41	ROI: 60
	- UID: Q9UK41	ROI: 70
	File : lcr_VC2020.dat
	Orig Line : Q9Y6A5 224;236 1.02 4 FALSE VC2022 elab
	Type : AMBIGUOUS
	UID Field : Q9Y6A5
	ROI Field : 224;236
	Splits
	- UID: Q9Y6A5	ROI: 224
	- UID: Q9Y6A5	ROI: 236
	File : lcr_VC2020.dat
	Orig Line : Q9UKG1 549;551 1.02 4 FALSE VC2022 elab
	Type : AMBIGUOUS
	UID Field : Q9UKG1
	ROI Field : 549;551
	Splits
	- UID: Q9UKG1	ROI: 549
[truncated: 7,013 more rows]

## Sheet: SD8-ABPP-Statistics
		STATISTICAL REPORT
		==================
		Total records: 683192
		Ambiguous/multi-value count: 0
		exp_bin breakdown:
		TRUE: 44661 (6.54%)
		FALSE: 638531 (93.46%)
		R-value stats:
		ALL:
		Min: -4.32
		Max: 2450.00
		Range: 2454.32
		Mean: 1.67
		Stdev: 4.72
		TRUE only:
		Min: 1.00
		Max: 2450.00
		Range: 2449.00
		Mean: 10.78
		Stdev: 15.49
		FALSE only:
		Min: -4.32
		Max: 20.00
		Range: 24.32
		Mean: 1.03
		Stdev: 0.89
		Per-source (ALL):
		Source Count %Total R_Min R_Max R_Rng R_Mean R_Std
		BB2023 41432 6.06% -4.32 4.85 9.17 0.95 1.00
		BB2024 25640 3.75% -2.76 3.69 6.45 0.30 0.37
		BB2025 839 0.12% 2.70 84.10 81.40 5.59 8.41
		BC2016 6440 0.94% 0.02 20.00 19.98 5.33 6.56
		CB2021 3594 0.53% 0.01 20.00 19.99 6.15 5.10
		KC2023 14322 2.10% 0.00 50.00 50.00 3.14 7.52
		KG2021 63879 9.35% 0.89 2450.00 2449.11 2.63 10.95
		NC2024 862 0.13% 2.00 100.00 98.00 6.05 8.17
		PC2017 4192 0.61% 0.69 20.00 19.31 10.57 6.96
		TC2022 40156 5.88% 0.06 600.00 599.94 1.08 4.09
		TY2025 423220 61.95% 0.05 20.00 19.95 1.35 2.83
		VC2020 40333 5.90% 0.12 20.00 19.88 2.89 3.96
		YB2021 7493 1.10% 0.01 20.00 19.99 1.62 1.78
		YB2023 2199 0.32% 0.00 414.45 414.45 3.37 13.94
		YW2022 8591 1.26% 0.18 20.00 19.82 2.15 2.08
		Per-source (TRUE):
		Source Count %TRUE R_Min R_Max R_Rng R_Mean R_Std
		BB2023 4561 10.21% 2.00 4.85 2.85 2.96 0.82
		BB2024 1197 2.68% 1.00 3.69 2.69 1.36 0.38
		BB2025 839 1.88% 2.70 84.10 81.40 5.59 8.41
		BC2016 1041 2.33% 3.11 20.00 16.89 16.33 5.79
		CB2021 908 2.03% 3.08 20.00 16.92 8.94 5.05
		KC2023 1474 3.30% 4.01 50.00 45.99 22.64 10.96
		KG2021 4970 11.13% 4.00 2450.00 2446.00 8.95 38.64
		NC2024 862 1.93% 2.00 100.00 98.00 6.05 8.17
		PC2017 2943 6.59% 5.00 20.00 15.00 13.65 5.92
		TC2022 198 0.44% 4.04 600.00 595.96 17.84 55.76
		TY2025 19884 44.52% 4.00 20.00 16.00 12.21 6.62
		VC2020 4310 9.65% 4.01 20.00 15.99 12.61 5.95
		YB2021 334 0.75% 4.00 20.00 16.00 7.82 4.63
		YB2023 536 1.20% 2.72 414.45 411.73 9.76 27.25
		YW2022 604 1.35% 4.01 20.00 15.99 7.97 4.39
		Per-source (FALSE):
		Source Count %FALSE R_Min R_Max R_Rng R_Mean R_Std
		BB2023 36871 5.77% -4.32 2.00 6.32 0.70 0.70
		BB2024 24443 3.83% -2.76 1.00 3.76 0.25 0.28
		BB2025 0 0.00% 0.00 0.00 0.00 0.00 0.00
		BC2016 5399 0.85% 0.02 20.00 19.98 3.20 4.12
		CB2021 2686 0.42% 0.01 20.00 19.99 5.20 4.76
		KC2023 12848 2.01% 0.00 4.91 4.91 0.90 0.73
		KG2021 58909 9.23% 0.89 3.99 3.10 2.09 0.61
		NC2024 0 0.00% 0.00 0.00 0.00 0.00 0.00
		PC2017 1249 0.20% 0.69 19.04 18.35 3.33 2.30
		TC2022 39958 6.26% 0.06 4.00 3.94 1.00 0.29
		TY2025 403336 63.17% 0.05 4.00 3.95 0.81 0.39
		VC2020 36023 5.64% 0.12 5.00 4.88 1.73 0.82
		YB2021 7159 1.12% 0.01 4.00 3.99 1.34 0.68
		YB2023 1663 0.26% 0.00 2.72 2.72 1.31 0.67
		YW2022 7987 1.25% 0.18 4.00 3.82 1.71 0.68

## Sheet: SD9-Orphaned
	[cleanup] Dropped 1607 orphaned multi‑value records; details written to sep04_s4r4-s4r4_PRO/dropped_mv.txt
	{"uid": "Q8TE12", "roi": 221, "R": 2.8, "exp_thr": 2.7, "exp_bin": true, "source": "BB2025", "note": "HEK293T	PP106 (mv)", "mw": null, "orig_ambiguous": false, "orig_multi_value": true, "og_uid": "O60663;Q8TE12", "sequence": "MLDGLKMEENFQSAIDTSASFSSLLGRAVSPKSVCEGCQRVILDRFLLRLNDSFWHEQCVQCASCKEPLETTCFYRDKKLYCKYDYEKLFAVKCGGCFEAIAPNEFVMRAQKSVYHLSCFCCCVCERQLQKGDEFVLKEGQLLCKGDYEKERELLSLVSPAASDSGKSDDEESLCKSAHGAGKGTAEEGKDHKRPKRPRTILTTQQRRAFKASFEVSSKPCRKVRETLAAETGLSVRVVQVWFQNQRAKMKKLARRQQQQQQDQQNTQRLSSAQTNGGGSAGM…
	{"uid": "O60663", "roi": 245, "R": 2.8, "exp_thr": 2.7, "exp_bin": true, "source": "BB2025", "note": "HEK293T	PP106 (mv)", "mw": null, "orig_ambiguous": false, "orig_multi_value": true, "og_uid": "O60663;Q8TE12", "sequence": "MDIATGPESLERCFPRGQTDCAKMLDGIKMEEHALRPGPATLGVLLGSDCPHPAVCEGCQRPISDRFLMRVNESSWHEECLQCAACQQALTTSCYFRDRKLYCKQDYQQLFAAKCSGCMEKIAPTEFVMRALECVYHLGCFCCCVCERQLRKGDEFVLKEGQLLCKGDYEKEKDLLSSVSPDESDSVKSEDEDGDMKPAKGQGSQSKGSGDDGKDPRRPKRPRTILTTQQRRAFKASFEVSSKPCRKVRETLAAETGLSVRVVQVWFQNQRAKMKKLARRHQQ…
	{"uid": "E7EX90", "roi": 871, "R": 50.0, "exp_thr": 5.0, "exp_bin": true, "source": "KC2023", "note": "CL1	(mv)", "mw": null, "orig_ambiguous": false, "orig_multi_value": true, "og_uid": "E7EX90;A0A7P0Z4C3;Q14203", "sequence": "MSAEASARPLRVGSRVEVIGKGHRGTVAYVGATLFATGKWVGVILDEAKGKNDGTVQGRKYFTCDEGHGIFVRQSQIQVFEDGADTTSPETPDSSASKVLKREGTDTTAKTSKLRGLKPKKAPTARKTTTRRPKPTRPASTGVAGASSSLGPSGSASAGELSSSEPSTPAQTPLAAPIIPTPVLTSPGAVPPLPSPSKEEEGLRAQVRDLEEKLETLRLKRAEDKAKLKELEKHKIQLEQVQEWKSKMQEQQADLQRRLKEARKEAKEALEAKERYME…
	{"uid": "E7EX90", "roi": 1230, "R": 0.0, "exp_thr": 5.0, "exp_bin": false, "source": "KC2023", "note": "CL1- (mv)", "mw": null, "orig_ambiguous": false, "orig_multi_value": true, "og_uid": "E7EX90;A0A7P0Z4C3;Q14203;E7EWF7", "sequence": "MSAEASARPLRVGSRVEVIGKGHRGTVAYVGATLFATGKWVGVILDEAKGKNDGTVQGRKYFTCDEGHGIFVRQSQIQVFEDGADTTSPETPDSSASKVLKREGTDTTAKTSKLRGLKPKKAPTARKTTTRRPKPTRPASTGVAGASSSLGPSGSASAGELS…
	{"uid": "A0A0G2JQT1", "roi": 98, "R": 50.0, "exp_thr": 5.0, "exp_bin": true, "source": "KC2023", "note": "CL1	(mv)", "mw": null, "orig_ambiguous": false, "orig_multi_value": true, "og_uid": "E7EVJ5;Q96F07;H7C229;A0A087WWZ1;A0A087WVE1;A0A087WTQ3;Q7L576;A0A0G2JR96;A0A0G2JQT1;A0A0G2JRX2;A0A087WU52;A0A0G2JRV9;A0A087WWL1", "sequence": "MAAQVTLEDALSNVDLLEELPLPDQQPCIEPPPSSLLYQPNFNTNFEDRNAFVTGIARYIEQATVHSSMNEMLEEGQEYAVMLYTWRSCSRAIPQVKCNEQPNRVEIYEKTVEVLEPEVTKLMNFMYFQRNAIERFCGEVRRLCHAERRKDFVSEAYLITLGKFINMFAVLDELKN…
	{"uid": "A0A0G2JQT1", "roi": 98, "R": 0.705068123, "exp_thr": 5.0, "exp_bin": false, "source": "KC2023", "note": "CL1- (mv)", "mw": null, "orig_ambiguous": false, "orig_multi_value": true, "og_uid": "E7EVJ5;Q96F07;H7C229;A0A087WWZ1;A0A087WVE1;A0A087WTQ3;Q7L576;A0A0G2JR96;A0A0G2JQT1;A0A0G2JRX2;A0A087WU52;A0A0G2JRV9;A0A087WWL1", "sequence": "MAAQVTLEDALSNVDLLEELPLPDQQPCIEPPPSSLLYQPNFNTNFEDRNAFVTGIA…
	{"uid": "E9PPQ5", "roi": 86, "R": 50.0, "exp_thr": 5.0, "exp_bin": true, "source": "KC2023", "note": "CL1	(mv)", "mw": null, "orig_ambiguous": false, "orig_multi_value": true, "og_uid": "Q9UHD1;E9PPQ5;E9PIZ4;E9PSD5", "sequence": "MALLCYNRGCGQRFDPETNSDDACTYHPGVPVFHDALKGWSCCKRRTTDFSDFLSIVGCTKGRHNSEKPPEPVKPEVKTTEKKELCELKPKFQEHIIQAPKPVEAIKRPSPDEPMTNLELKISASLKQALDKLKLSSGNEENKKEEDNDEIKIGTSCKNGGCSKSLHLQQQWGPDLPDKPWIYI", "mapped_roi": 86, "window_seq": "EVKTTEKKELCELKPKFQEHI"}
	{"uid": "E7EPN9", "roi": 225, "R": 50.0, "exp_thr": 5.0, "exp_bin": true, "source": "KC2023", "note": "CL1	(mv)", "mw": null, "orig_ambiguous": false, "orig_multi_value": true, "og_uid": "E7EPN9;Q9Y520", "sequence": "MSEKSGQSTKAKDGKKYATLSLFNTYKGKSLETQKTTVAARHGLQSLGKVGISRRMPPPANLPSLKAENKGNDPNVNIVPKDGTGWASKQEQHEEEKTPEVPPAQPKPGVAAPPEVAPAPKSWASNKQGGQGDGIQVNSQFQQEFPSLQAAGDQEKKEKETNDDNYGPGPSLRPPNVACWRDGGKAAGSPSSSDQDEKLPGQDESTAGTSEQNDILKVVEKRIACGPPQAKLNGQQAALASQYRAMMPPYMFQQYPRMTYPPLHGPMRFPPSLSETNKGLRGRGPPPSW…
	{"uid": "E5RI14", "roi": 63, "R": 50.0, "exp_thr": 5.0, "exp_bin": true, "source": "KC2023", "note": "CL1	(mv)", "mw": null, "orig_ambiguous": false, "orig_multi_value": true, "og_uid": "Q9Y620;E5RI14;E5RHN9", "sequence": "MRRSAAPSQLQGNSFKKPKFIPPGRSNPGLNEEITKLNPDIKLFEGVAINNTFLPSQNDLRICSLNLPSEESTREINNRDNCSGKYCFEAPTLATLDPPHTVQTWMRRHRLVPVHYSSFGS", "mapped_roi": 63, "window_seq": "FLPSQNDLRICSLNLPSEEST"}
	{"uid": "J3QSY4", "roi": 18, "R": 50.0, "exp_thr": 5.0, "exp_bin": true, "source": "KC2023", "note": "CL1	(mv)", "mw": null, "orig_ambiguous": false, "orig_multi_value": true, "og_uid": "J3QSY4;D6RC52;D6RCB9;Q9NX24", "sequence": "MTKIKADPDGPEAQAEACSGERTYQELLVNQNPIAQPLASRRLTRKLYKCIKKAVKQKQIRRGVKEVQKFVNKGEKGTWVQPQAPSAPPV", "mapped_roi": 18, "window_seq": "PDGPEAQAEACSGERTYQELL"}
	{"uid": "J3QSY4", "roi": 18, "R": 0.370780334, "exp_thr": 5.0, "exp_bin": false, "source": "KC2023", "note": "CL1- (mv)", "mw": null, "orig_ambiguous": false, "orig_multi_value": true, "og_uid": "J3QSY4;D6RC52;D6RCB9;Q9NX24", "sequence": "MTKIKADPDGPEAQAEACSGERTYQELLVNQNPIAQPLASRRLTRKLYKCIKKAVKQKQIRRGVKEVQKFVNKGEKGTWVQPQAPSAPPV", "mapped_roi": 18, "window_seq": "PDGPEAQAEACSGERTYQELL"}
	{"uid": "A0A494C1B8", "roi": 28, "R": 50.0, "exp_thr": 5.0, "exp_bin": true, "source": "KC2023", "note": "CL1	(mv)", "mw": null, "orig_ambiguous": false, "orig_multi_value": true, "og_uid": "Q5VZU9;P29144;A0A494C1B8;A0A494C0U1;A0A494C1S4", "sequence": "MATAATEEPFPFHGLLPKKETGAASFLCRYPEYDGRGVLIAVLDTGVDPGAPGMQVTTDGKPKIVDIIDTTGSGDVNTATEVEPKDGEIVGLSGRVLKIPASWTNPSGKYHIGIKNGYDFYPKALKERIQKERKEKIWDPVHRVALAEACRKQEEFDVANNGSSQANKLIKEELQSQVELLNSFEKKYSDPGPVYDCLVWHDGEVWRACIDSNEDGDLSKSTVLRNYKEAQEYGSFGTAEMLNYSVNIYDDGNLLS…
	{"uid": "H7C229", "roi": 98, "R": 50.0, "exp_thr": 5.0, "exp_bin": true, "source": "KC2023", "note": "CL1	(mv)", "mw": null, "orig_ambiguous": false, "orig_multi_value": true, "og_uid": "E7EVJ5;Q96F07;H7C229;A0A087WWZ1;A0A087WVE1;A0A087WTQ3;Q7L576;A0A0G2JR96;A0A0G2JQT1;A0A0G2JRX2;A0A087WU52;A0A0G2JRV9;A0A087WWL1", "sequence": "MTTHVTLEDALSNVDLLEELPLPDQQPCIEPPPSSIMYQANFDTNFEDRNAFVTGIARYIEQATVHSSMNEMLEEGHEYAVMLYTWRSCSRAIPQVKCNEQPNRVEIYEKTVEVLEPEVTKLMKFMYFQVMGFGLYLMDGNVSNIYKLDAKKRINLSKIDKFFKQLQVVPLFGDMQ…
	{"uid": "H7C229", "roi": 98, "R": 0.705068123, "exp_thr": 5.0, "exp_bin": false, "source": "KC2023", "note": "CL1- (mv)", "mw": null, "orig_ambiguous": false, "orig_multi_value": true, "og_uid": "E7EVJ5;Q96F07;H7C229;A0A087WWZ1;A0A087WVE1;A0A087WTQ3;Q7L576;A0A0G2JR96;A0A0G2JQT1;A0A0G2JRX2;A0A087WU52;A0A0G2JRV9;A0A087WWL1", "sequence": "MTTHVTLEDALSNVDLLEELPLPDQQPCIEPPPSSIMYQANFDTNFEDRNAFVTGIARYIE…
	{"uid": "A0A087WWZ1", "roi": 98, "R": 50.0, "exp_thr": 5.0, "exp_bin": true, "source": "KC2023", "note": "CL1	(mv)", "mw": null, "orig_ambiguous": false, "orig_multi_value": true, "og_uid": "E7EVJ5;Q96F07;H7C229;A0A087WWZ1;A0A087WVE1;A0A087WTQ3;Q7L576;A0A0G2JR96;A0A0G2JQT1;A0A0G2JRX2;A0A087WU52;A0A0G2JRV9;A0A087WWL1", "sequence": "MTTHVTLEDALSNVDLLEELPLPDQQPCIEPPPSSIMYQANFDTNFEDRNAFVTGIARYIEQATVHSSMNEMLEEGHEYAVMLYTWRSCSRAIPQVKCNEQPNRVEIYEKTVEVLEPEVTKLMKFMYFQRKAIERFCSEVKRLCHAERRKDFVSEAYLLTLGKFINMFAVLDELKN…
	{"uid": "A0A087WWZ1", "roi": 98, "R": 0.705068123, "exp_thr": 5.0, "exp_bin": false, "source": "KC2023", "note": "CL1- (mv)", "mw": null, "orig_ambiguous": false, "orig_multi_value": true, "og_uid": "E7EVJ5;Q96F07;H7C229;A0A087WWZ1;A0A087WVE1;A0A087WTQ3;Q7L576;A0A0G2JR96;A0A0G2JQT1;A0A0G2JRX2;A0A087WU52;A0A0G2JRV9;A0A087WWL1", "sequence": "MTTHVTLEDALSNVDLLEELPLPDQQPCIEPPPSSIMYQANFDTNFEDRNAFVTGIA…
	{"uid": "A0A0G2JQT1", "roi": 98, "R": 50.0, "exp_thr": 5.0, "exp_bin": true, "source": "KC2023", "note": "CL1	(mv)", "mw": null, "orig_ambiguous": false, "orig_multi_value": true, "og_uid": "E7EVJ5;Q96F07;H7C229;A0A087WWZ1;A0A087WVE1;A0A087WTQ3;Q7L576;A0A0G2JR96;A0A0G2JQT1;A0A0G2JRX2;A0A087WU52;A0A0G2JRV9;A0A087WWL1", "sequence": "MAAQVTLEDALSNVDLLEELPLPDQQPCIEPPPSSLLYQPNFNTNFEDRNAFVTGIARYIEQATVHSSMNEMLEEGQEYAVMLYTWRSCSRAIPQVKCNEQPNRVEIYEKTVEVLEPEVTKLMNFMYFQRNAIERFCGEVRRLCHAERRKDFVSEAYLITLGKFINMFAVLDELKN…
	{"uid": "A0A0G2JQT1", "roi": 98, "R": 0.705068123, "exp_thr": 5.0, "exp_bin": false, "source": "KC2023", "note": "CL1- (mv)", "mw": null, "orig_ambiguous": false, "orig_multi_value": true, "og_uid": "E7EVJ5;Q96F07;H7C229;A0A087WWZ1;A0A087WVE1;A0A087WTQ3;Q7L576;A0A0G2JR96;A0A0G2JQT1;A0A0G2JRX2;A0A087WU52;A0A0G2JRV9;A0A087WWL1", "sequence": "MAAQVTLEDALSNVDLLEELPLPDQQPCIEPPPSSLLYQPNFNTNFEDRNAFVTGIA…
	{"uid": "F8W9S7", "roi": 720, "R": 50.0, "exp_thr": 5.0, "exp_bin": true, "source": "KC2023", "note": "CL1	(mv)", "mw": null, "orig_ambiguous": false, "orig_multi_value": true, "og_uid": "F8W9S7;Q14C86;C9IZ08;H0Y4E7;H0Y7I9;B4DGD8", "sequence": "MVKLDIHTLAHHLKQERLYVNSEKQLIQRLNADVLKTAEKLYRTAWIAKQQRINLDRLIITSAEASPAECCQHAKILEDTQFVDGYKQLGFQETAYGEFLSRLRENPRLIASSLVAGEKLNQENTQSVIYTVFTSLYGNCIMQEDESYLLQVLRYLIEFELKESDNPRRLLRRGTCAFSILFKLFSEGLFSAKLFLTATLHEPIMQLLVEDEDHLETDPNKLIERFSPSQQEKLFGEKGSDRFRQKVQEMVESNEAKLVAL…
	{"uid": "F8W9S7", "roi": 275, "R": 0.810547624, "exp_thr": 5.0, "exp_bin": false, "source": "KC2023", "note": "CL1- (mv)", "mw": null, "orig_ambiguous": false, "orig_multi_value": true, "og_uid": "F8W9S7;Q14C86;C9IZ08;H0Y4E7;H0Y7I9;B4DGD8;B0QZ65;A0A0A0MQV8", "sequence": "MVKLDIHTLAHHLKQERLYVNSEKQLIQRLNADVLKTAEKLYRTAWIAKQQRINLDRLIITSAEASPAECCQHAKILEDTQFVDGYKQLGFQETAYGEFLSRLRENPRLIASSLVAGEKLNQENTQS…
	{"uid": "A0A075B6F9", "roi": 8, "R": 50.0, "exp_thr": 5.0, "exp_bin": true, "source": "KC2023", "note": "CL1	(mv)", "mw": null, "orig_ambiguous": false, "orig_multi_value": true, "og_uid": "M0R3B2;Q9Y314;A0A075B6F9;M0R1T7;M0QX85;M0R1K2", "sequence": "MTRHGKNCTAGAVYTYHEKKKDTAASGYGTQNIRLSRDAVKDFDCCCLSLQPCHDPVVTPDGYLYEREAILEYILHQKKEIARQMKAYEKQRGTRREEQKELQRAASQDHVRGFLEKESAIVSRPLNPFTAKALSGTSPGDSDDVQPGPSVGPPSKDKDKVLPSFWIPSLTPEAKATKLEKPSRTVTCPMSGKPLRMSDLTPVHFTPLDSSVDRVGLITRSERYVCAVTRDSLSNATPCAVLRPSGAVVTLECVEKL…
	{"uid": "E9PSD5", "roi": 86, "R": 50.0, "exp_thr": 5.0, "exp_bin": true, "source": "KC2023", "note": "CL1	(mv)", "mw": null, "orig_ambiguous": false, "orig_multi_value": true, "og_uid": "Q9UHD1;E9PPQ5;E9PIZ4;E9PSD5", "sequence": "MALLCYNRGCGQRFDPETNSDDACTYHPGVPVFHDALKGWSCCKRRTTDFSDFLSIVGCTKGRHNSEKPPEPVKPEVKTTEKKELCELKPKFQEHIIQAPKPVEAIKRPRFQNSPAQMNQ", "mapped_roi": 86, "window_seq": "EVKTTEKKELCELKPKFQEHI"}
	{"uid": "E9PIZ4", "roi": 86, "R": 50.0, "exp_thr": 5.0, "exp_bin": true, "source": "KC2023", "note": "CL1	(mv)", "mw": null, "orig_ambiguous": false, "orig_multi_value": true, "og_uid": "Q9UHD1;E9PPQ5;E9PIZ4;E9PSD5", "sequence": "MALLCYNRGCGQRFDPETNSDDACTYHPGVPVFHDALKGWSCCKRRTTDFSDFLSIVGCTKGRHNSEKPPEPVKPEVKTTEKKELCELKPKFQEHIIQAPKPVEAIKRPRSSSCYT", "mapped_roi": 86, "window_seq": "EVKTTEKKELCELKPKFQEHI"}
	{"uid": "M0R1K2", "roi": 8, "R": 50.0, "exp_thr": 5.0, "exp_bin": true, "source": "KC2023", "note": "CL1	(mv)", "mw": null, "orig_ambiguous": false, "orig_multi_value": true, "og_uid": "M0R3B2;Q9Y314;A0A075B6F9;M0R1T7;M0QX85;M0R1K2", "sequence": "MTRHGKNCTAGAVYTYHEKKKDTAASGYGTQNIRLSRDAVKDFDCCCLSLQPCHDPVVTPDGYLYEREAILEYILHQKKEIARQMKAYEKQRGTRREEQKELQRAASQDHVRGFLEKESAIVSRPLNPFTAKALSGTSPDDVQPGPSVGPPNSSVDRVGLITRSERYVCAVTRDSL", "mapped_roi": 8, "window_seq": "MTRHGKNCTAGAVYTYHE"}
	{"uid": "A0A6I8PIQ6", "roi": 568, "R": 50.0, "exp_thr": 5.0, "exp_bin": true, "source": "KC2023", "note": "CL1	(mv)", "mw": null, "orig_ambiguous": false, "orig_multi_value": true, "og_uid": "A0A6I8PIQ6;A0A0A0MS45;J3KNI1;Q9H9E3", "sequence": "MADLDSPPKLSGVQQPSEGVGGGRCSEISAELIRSLTELQELEAVYERLCGEEKVVERELDALLEQQNTIESKMVTLHRMGPNLQLIEGDAKQLAGMITFTCNLAENVSSKVRQLDLAKNRLYQAIQRADDILDLKFCMDGVQTALRSEDYEQAAAHTHRYLCLDKSVIELSRQGKEGSMIDANLKLLQEAEQRLKAIVAEKFAIATKEGDLPQVERFFKIFPLLGLHEEGLRKFSEYLCKQVASKAEENLLMVLGTDMSDRRAAVI…
	{"uid": "D6RC52", "roi": 18, "R": 50.0, "exp_thr": 5.0, "exp_bin": true, "source": "KC2023", "note": "CL1	(mv)", "mw": null, "orig_ambiguous": false, "orig_multi_value": true, "og_uid": "J3QSY4;D6RC52;D6RCB9;Q9NX24", "sequence": "MTKIKADPDGPEAQAEACSGERTYQELLVNQNPIAQPLASRRLTRKLYKCIKKAVKQKQIRRGVKEVQKFVNKGEKGIMVLAGDTLPIEVYCHLPVMCEDRNLPYVYIPSKTVRSTWPPDLAQHWGVWDSLP", "mapped_roi": 18, "window_seq": "PDGPEAQAEACSGERTYQELL"}
	{"uid": "D6RC52", "roi": 18, "R": 0.370780334, "exp_thr": 5.0, "exp_bin": false, "source": "KC2023", "note": "CL1- (mv)", "mw": null, "orig_ambiguous": false, "orig_multi_value": true, "og_uid": "J3QSY4;D6RC52;D6RCB9;Q9NX24", "sequence": "MTKIKADPDGPEAQAEACSGERTYQELLVNQNPIAQPLASRRLTRKLYKCIKKAVKQKQIRRGVKEVQKFVNKGEKGIMVLAGDTLPIEVYCHLPVMCEDRNLPYVYIPSKTVRSTWPPDLAQHWGVWDSLP", "mapped_roi": 18, "window…
	{"uid": "A0A3B3ISQ4", "roi": 543, "R": 50.0, "exp_thr": 5.0, "exp_bin": true, "source": "KC2023", "note": "CL1	(mv)", "mw": null, "orig_ambiguous": false, "orig_multi_value": true, "og_uid": "Q9H6S3;A0A3B3ISQ4", "sequence": "MSQSGAVSCCPGATNGSLGRSDGVAKMSPKDLFEQRKKYSNSNVIMHETSQYHVQHLATFIMDKSEAITSVDDAIRKLVQLSSKEKIWTQEMLLQVNDQSLRLLDIESQEELEDFPLPTVQRSQTVLNQLRYPSVLLLVCQDSEQSKPDVHFFHCDEVEAELVHEDIESALADCRLGKKMRPQTLKGHQEKIRQRQSILPPPQGPAPIPFQHRGGDSPEAKNRVGPQVPLSEPGFRRRESQEEPRAVLAQKIEKETQILNCALDDIEWFVARLQKAAEAFKQLNQ…
	{"uid": "A0A3B3ISQ4", "roi": 369, "R": 0.683169955, "exp_thr": 5.0, "exp_bin": false, "source": "KC2023", "note": "CL1- (mv)", "mw": null, "orig_ambiguous": false, "orig_multi_value": true, "og_uid": "Q9H6S3;A0A3B3ISQ4", "sequence": "MSQSGAVSCCPGATNGSLGRSDGVAKMSPKDLFEQRKKYSNSNVIMHETSQYHVQHLATFIMDKSEAITSVDDAIRKLVQLSSKEKIWTQEMLLQVNDQSLRLLDIESQEELEDFPLPTVQRSQTVLNQLRYPSVLLLVCQDSEQSKPDVHFFHCDEVEAELVHE…
	{"uid": "D6RCB9", "roi": 18, "R": 50.0, "exp_thr": 5.0, "exp_bin": true, "source": "KC2023", "note": "CL1	(mv)", "mw": null, "orig_ambiguous": false, "orig_multi_value": true, "og_uid": "J3QSY4;D6RC52;D6RCB9;Q9NX24", "sequence": "MTKIKADPDGPEAQAEACSGERTYQELLVNQNPIAQPLASRRLTRKLYKCIKKAVKQKQIRRGVKEVQKFVNKGEKGIMVLAGDTLPIEVYCHLPVMCEDRNLPYVYIPSKTFPSCKVGIPAQALWLTPVILVLW", "mapped_roi": 18, "window_seq": "PDGPEAQAEACSGERTYQELL"}
	{"uid": "D6RCB9", "roi": 18, "R": 0.370780334, "exp_thr": 5.0, "exp_bin": false, "source": "KC2023", "note": "CL1- (mv)", "mw": null, "orig_ambiguous": false, "orig_multi_value": true, "og_uid": "J3QSY4;D6RC52;D6RCB9;Q9NX24", "sequence": "MTKIKADPDGPEAQAEACSGERTYQELLVNQNPIAQPLASRRLTRKLYKCIKKAVKQKQIRRGVKEVQKFVNKGEKGIMVLAGDTLPIEVYCHLPVMCEDRNLPYVYIPSKTFPSCKVGIPAQALWLTPVILVLW", "mapped_roi": 18, "win…
	{"uid": "A0A7I2V2S0", "roi": 200, "R": 50.0, "exp_thr": 5.0, "exp_bin": true, "source": "KC2023", "note": "CL1	(mv)", "mw": null, "orig_ambiguous": false, "orig_multi_value": true, "og_uid": "A0A1X7SBZ2;A0A5H1ZRQ2;Q92841;J3KTA4;P17844;A0A0G2JLI4;A0A7I2V507;A0A7I2V2S0;A0A7I2V5F5;J3KRZ1;J3QRQ7", "sequence": "MSGYSSDRDRGRDRGFGAPRFGGSRAGPLSGKKFGNPGEKLVKKKWNLDELPKFEKNFYQEHPDLARRTAQEVETYRRSKEITVRGHNCPKPVLNFYEANFPANVMDVIARQNFTEPTAIQAQGWPVALSGLDMVGVAQTGSGKTLSYLLPAIVHINHQPFLERGDGPICLVLAPTRELAQQVQQVAAEYCRACRLKSTCIY…
	{"uid": "A0A7I2V2S0", "roi": 191, "R": 0.964351005, "exp_thr": 5.0, "exp_bin": false, "source": "KC2023", "note": "CL1- (mv)", "mw": null, "orig_ambiguous": false, "orig_multi_value": true, "og_uid": "J3KTA4;P17844;A0A0G2JLI4;A0A7I2V507;A0A7I2V2S0;A0A7I2V5F5;J3KRZ1;J3QRQ7", "sequence": "MSGYSSDRDRGRDRGFGAPRFGGSRAGPLSGKKFGNPGEKLVKKKWNLDELPKFEKNFYQEHPDLARRTAQEVETYRRSKEITVRGHNCPKPVLNFYEANFPANVMDVIAR…
	{"uid": "A0A7I2V2S0", "roi": 234, "R": 0.294367449, "exp_thr": 5.0, "exp_bin": false, "source": "KC2023", "note": "CL1- (mv)", "mw": null, "orig_ambiguous": false, "orig_multi_value": true, "og_uid": "J3KTA4;P17844;A0A0G2JLI4;A0A7I2V507;A0A7I2V2S0;A0A7I2V5F5;J3QSF1;J3KRZ1", "sequence": "MSGYSSDRDRGRDRGFGAPRFGGSRAGPLSGKKFGNPGEKLVKKKWNLDELPKFEKNFYQEHPDLARRTAQEVETYRRSKEITVRGHNCPKPVLNFYEANFPANVMDVIAR…
	{"uid": "V9GYU2", "roi": 72, "R": 50.0, "exp_thr": 5.0, "exp_bin": true, "source": "KC2023", "note": "CL1	(mv)", "mw": null, "orig_ambiguous": false, "orig_multi_value": true, "og_uid": "V9GYU2;F8WB76;B5MCX7;H7C3L3;D3YTC9;Q6NXT1", "sequence": "MPMMWKQCSCSWTMVLILTSEMGWGTRHCTWRPAPTTFLSSPHCYEEIIHMLREYLERLGQHEQRERLDDLCTRLQMTSTKEQVDEVTDLLASFTSLSLQMQSMEKR", "mapped_roi": 72, "window_seq": "HEQRERLDDLCTRLQMTSTKE"}
	{"uid": "H0YL85", "roi": 87, "R": 50.0, "exp_thr": 5.0, "exp_bin": true, "source": "KC2023", "note": "CL1	(mv)", "mw": null, "orig_ambiguous": false, "orig_multi_value": true, "og_uid": "H0YMP5;H0YL03;H0YMK0;H0YL85;A0A0A6YYH1;Q7Z6K5", "sequence": "MSSYKVEAKGDTDRLTPEALKGLVNKPELLALTESLTPDHTVAFWMPESEMEVMELELGAGVRLKTRGDGPFLDSLAKLEAGTVTKCNFTGDGKTGASWTDNIMAQKCSKGAAAEIREQGDGAEDEEWVFVETLDKCFENVCELDLIFHMDKVHYILQEVVMGGMVLETNMNEIVAQIEAQNRLE", "mapped_roi": 87, "window_seq": "AKLEAGTVTKCNFTGDGKTGA"}
	{"uid": "E7EMW7", "roi": 2088, "R": 50.0, "exp_thr": 5.0, "exp_bin": true, "source": "KC2023", "note": "CL1	(mv)", "mw": null, "orig_ambiguous": false, "orig_multi_value": true, "og_uid": "E7EMW7;O95071", "sequence": "MTSIHFVVHPLPGTEDQLNDRLREVSEKLNKYNLNSHPPLNVLEQATIKQCVVGPNHAAFLLEDGRVCRIGFSVQPDRLELGKPDNNDGSKLNSNSGAGRTSRPGRTSDSPWFLSGSETLGRLAGNTLGSRWSSGVGGSGGGSSGRSSAGARDSRRQTRVIRTGRDRGSGLLGSQPQPVIPASVIPEELISQAQVVLQGKSRSVIIRELQRTNLDVNLAVNNLLSRDDEDGDDGDDTASESYLPGEDLMSLLDADIHSAHPSVIIDADAMFSEDISYFGYPSFRRSSLS…
	{"uid": "E7EMW7", "roi": 724, "R": 1.491041448, "exp_thr": 5.0, "exp_bin": false, "source": "KC2023", "note": "CL1- (mv)", "mw": null, "orig_ambiguous": false, "orig_multi_value": true, "og_uid": "E7EMW7;O95071", "sequence": "MTSIHFVVHPLPGTEDQLNDRLREVSEKLNKYNLNSHPPLNVLEQATIKQCVVGPNHAAFLLEDGRVCRIGFSVQPDRLELGKPDNNDGSKLNSNSGAGRTSRPGRTSDSPWFLSGSETLGRLAGNTLGSRWSSGVGGSGGGSSGRSSAGARDSRRQTRVIRTGRDRGSGLLG…
	{"uid": "E7EMW7", "roi": 2308, "R": 0.87870145, "exp_thr": 5.0, "exp_bin": false, "source": "KC2023", "note": "CL1- (mv)", "mw": null, "orig_ambiguous": false, "orig_multi_value": true, "og_uid": "E7EMW7;O95071;E7ET84;E5RFK7", "sequence": "MTSIHFVVHPLPGTEDQLNDRLREVSEKLNKYNLNSHPPLNVLEQATIKQCVVGPNHAAFLLEDGRVCRIGFSVQPDRLELGKPDNNDGSKLNSNSGAGRTSRPGRTSDSPWFLSGSETLGRLAGNTLGSRWSSGVGGSGGGSSGRSSAGARDSRRQTR…
	{"uid": "E7EMW7", "roi": 2261, "R": 0.773656446, "exp_thr": 5.0, "exp_bin": false, "source": "KC2023", "note": "CL1- (mv)", "mw": null, "orig_ambiguous": false, "orig_multi_value": true, "og_uid": "E7EMW7;O95071;E5RFK7", "sequence": "MTSIHFVVHPLPGTEDQLNDRLREVSEKLNKYNLNSHPPLNVLEQATIKQCVVGPNHAAFLLEDGRVCRIGFSVQPDRLELGKPDNNDGSKLNSNSGAGRTSRPGRTSDSPWFLSGSETLGRLAGNTLGSRWSSGVGGSGGGSSGRSSAGARDSRRQTRVIRTGR…
	{"uid": "M0R1T7", "roi": 8, "R": 50.0, "exp_thr": 5.0, "exp_bin": true, "source": "KC2023", "note": "CL1	(mv)", "mw": null, "orig_ambiguous": false, "orig_multi_value": true, "og_uid": "M0R3B2;Q9Y314;A0A075B6F9;M0R1T7;M0QX85;M0R1K2", "sequence": "MTRHGKNCTAGAVYTYHEKKKDTAASGYGTQNIRLSRDAVKDFDCCCLSLQPCHDPVVTWLPV", "mapped_roi": 8, "window_seq": "MTRHGKNCTAGAVYTYHE"}
	{"uid": "A0A7I2YBM0", "roi": 1553, "R": 50.0, "exp_thr": 5.0, "exp_bin": true, "source": "KC2023", "note": "CL1	(mv)", "mw": null, "orig_ambiguous": false, "orig_multi_value": true, "og_uid": "Q9UPY3;A0A7I2YBM0;H0YJZ6", "sequence": "MKSPALQPLSMAGLQLMTPASSPMGPFFGLPWQQEAIHDNIYTPRKYQVELLEAALDHNTIVCLNTGSGKTFIAVLLTKELSYQIRGDFSRNGKRTVFLVNSANQVAQQVSAVRTHSDLKVGEYSNLEVNASWTKERWNQEFTKHQVLIMTCYVALNVLKNGYLSLSDINLLVFDECHLAILDHPYREIMKLCENCPSCPRILGLTASILNGKCDPEELEEKIQKLEKILKSNAETATDLVVLDRYTSQPCEIVVDCGPFTDRSGLYERLLMELEEAL…
	{"uid": "A0A7I2YBM0", "roi": 1535, "R": 2.993338778, "exp_thr": 5.0, "exp_bin": false, "source": "KC2023", "note": "CL1- (mv)", "mw": null, "orig_ambiguous": false, "orig_multi_value": true, "og_uid": "Q9UPY3;A0A7I2YBM0;H0YJZ6", "sequence": "MKSPALQPLSMAGLQLMTPASSPMGPFFGLPWQQEAIHDNIYTPRKYQVELLEAALDHNTIVCLNTGSGKTFIAVLLTKELSYQIRGDFSRNGKRTVFLVNSANQVAQQVSAVRTHSDLKVGEYSNLEVNASWTKERWNQEFTKHQVLIMTCYVALN…
	{"uid": "A0A7I2YBM0", "roi": 1648, "R": 0.680596341, "exp_thr": 5.0, "exp_bin": false, "source": "KC2023", "note": "CL1- (mv)", "mw": null, "orig_ambiguous": false, "orig_multi_value": true, "og_uid": "Q9UPY3;A0A7I2YBM0;H0YJZ6", "sequence": "MKSPALQPLSMAGLQLMTPASSPMGPFFGLPWQQEAIHDNIYTPRKYQVELLEAALDHNTIVCLNTGSGKTFIAVLLTKELSYQIRGDFSRNGKRTVFLVNSANQVAQQVSAVRTHSDLKVGEYSNLEVNASWTKERWNQEFTKHQVLIMTCYVALN…
	{"uid": "A0A7I2YBM0", "roi": 1122, "R": 0.50391034, "exp_thr": 5.0, "exp_bin": false, "source": "KC2023", "note": "CL1- (mv)", "mw": null, "orig_ambiguous": false, "orig_multi_value": true, "og_uid": "Q9UPY3;A0A7I2YBM0;H0YJZ6", "sequence": "MKSPALQPLSMAGLQLMTPASSPMGPFFGLPWQQEAIHDNIYTPRKYQVELLEAALDHNTIVCLNTGSGKTFIAVLLTKELSYQIRGDFSRNGKRTVFLVNSANQVAQQVSAVRTHSDLKVGEYSNLEVNASWTKERWNQEFTKHQVLIMTCYVALNV…
	{"uid": "A0A7I2YBM0", "roi": 1621, "R": 0.465791408, "exp_thr": 5.0, "exp_bin": false, "source": "KC2023", "note": "CL1- (mv)", "mw": null, "orig_ambiguous": false, "orig_multi_value": true, "og_uid": "Q9UPY3;A0A7I2YBM0;H0YJZ6", "sequence": "MKSPALQPLSMAGLQLMTPASSPMGPFFGLPWQQEAIHDNIYTPRKYQVELLEAALDHNTIVCLNTGSGKTFIAVLLTKELSYQIRGDFSRNGKRTVFLVNSANQVAQQVSAVRTHSDLKVGEYSNLEVNASWTKERWNQEFTKHQVLIMTCYVALN…
	{"uid": "A0A7I2YBM0", "roi": 1153, "R": 0.0, "exp_thr": 5.0, "exp_bin": false, "source": "KC2023", "note": "CL1- (mv)", "mw": null, "orig_ambiguous": false, "orig_multi_value": true, "og_uid": "Q9UPY3;A0A7I2YBM0;H0YJZ6", "sequence": "MKSPALQPLSMAGLQLMTPASSPMGPFFGLPWQQEAIHDNIYTPRKYQVELLEAALDHNTIVCLNTGSGKTFIAVLLTKELSYQIRGDFSRNGKRTVFLVNSANQVAQQVSAVRTHSDLKVGEYSNLEVNASWTKERWNQEFTKHQVLIMTCYVALNVLKNGYLS…
	{"uid": "H0YJZ6", "roi": 1553, "R": 50.0, "exp_thr": 5.0, "exp_bin": true, "source": "KC2023", "note": "CL1	(mv)", "mw": null, "orig_ambiguous": false, "orig_multi_value": true, "og_uid": "Q9UPY3;A0A7I2YBM0;H0YJZ6", "sequence": "MKSPALQPLSMAGLQLMTPASSPMGPFFGLPWQQEAIHDNIYTPRKYQVELLEAALDHNTIVCLNTGSGKTFIAVLLTKELSYQIRGDFSRNGKRTVFLVNSANQVAQQVSAVRTHSDLKVGEYSNLEVNASWTKERWNQEFTKHQVLIMTCYVALNVLKNGYLSLSDINLLVFDECHLAILDHPYREIMKLCENCPSCPRILGLTASILNGKCDPEELEEKIQKLEKILKSNAETATDLVVLDRYTSQPCEIVVDCGPFTDRSGLYERLLMELEEAL…
	{"uid": "H0YJZ6", "roi": 1535, "R": 2.993338778, "exp_thr": 5.0, "exp_bin": false, "source": "KC2023", "note": "CL1- (mv)", "mw": null, "orig_ambiguous": false, "orig_multi_value": true, "og_uid": "Q9UPY3;A0A7I2YBM0;H0YJZ6", "sequence": "MKSPALQPLSMAGLQLMTPASSPMGPFFGLPWQQEAIHDNIYTPRKYQVELLEAALDHNTIVCLNTGSGKTFIAVLLTKELSYQIRGDFSRNGKRTVFLVNSANQVAQQVSAVRTHSDLKVGEYSNLEVNASWTKERWNQEFTKHQVLIMTCYVALNVLKN…
	{"uid": "H0YJZ6", "roi": 1648, "R": 0.680596341, "exp_thr": 5.0, "exp_bin": false, "source": "KC2023", "note": "CL1- (mv)", "mw": null, "orig_ambiguous": false, "orig_multi_value": true, "og_uid": "Q9UPY3;A0A7I2YBM0;H0YJZ6", "sequence": "MKSPALQPLSMAGLQLMTPASSPMGPFFGLPWQQEAIHDNIYTPRKYQVELLEAALDHNTIVCLNTGSGKTFIAVLLTKELSYQIRGDFSRNGKRTVFLVNSANQVAQQVSAVRTHSDLKVGEYSNLEVNASWTKERWNQEFTKHQVLIMTCYVALNVLKN…
	{"uid": "H0YJZ6", "roi": 1122, "R": 0.50391034, "exp_thr": 5.0, "exp_bin": false, "source": "KC2023", "note": "CL1- (mv)", "mw": null, "orig_ambiguous": false, "orig_multi_value": true, "og_uid": "Q9UPY3;A0A7I2YBM0;H0YJZ6", "sequence": "MKSPALQPLSMAGLQLMTPASSPMGPFFGLPWQQEAIHDNIYTPRKYQVELLEAALDHNTIVCLNTGSGKTFIAVLLTKELSYQIRGDFSRNGKRTVFLVNSANQVAQQVSAVRTHSDLKVGEYSNLEVNASWTKERWNQEFTKHQVLIMTCYVALNVLKNG…
	{"uid": "H0YJZ6", "roi": 1621, "R": 0.465791408, "exp_thr": 5.0, "exp_bin": false, "source": "KC2023", "note": "CL1- (mv)", "mw": null, "orig_ambiguous": false, "orig_multi_value": true, "og_uid": "Q9UPY3;A0A7I2YBM0;H0YJZ6", "sequence": "MKSPALQPLSMAGLQLMTPASSPMGPFFGLPWQQEAIHDNIYTPRKYQVELLEAALDHNTIVCLNTGSGKTFIAVLLTKELSYQIRGDFSRNGKRTVFLVNSANQVAQQVSAVRTHSDLKVGEYSNLEVNASWTKERWNQEFTKHQVLIMTCYVALNVLKN…
	{"uid": "H0YJZ6", "roi": 1153, "R": 0.0, "exp_thr": 5.0, "exp_bin": false, "source": "KC2023", "note": "CL1- (mv)", "mw": null, "orig_ambiguous": false, "orig_multi_value": true, "og_uid": "Q9UPY3;A0A7I2YBM0;H0YJZ6", "sequence": "MKSPALQPLSMAGLQLMTPASSPMGPFFGLPWQQEAIHDNIYTPRKYQVELLEAALDHNTIVCLNTGSGKTFIAVLLTKELSYQIRGDFSRNGKRTVFLVNSANQVAQQVSAVRTHSDLKVGEYSNLEVNASWTKERWNQEFTKHQVLIMTCYVALNVLKNGYLSLSDI…
	{"uid": "C9JW69", "roi": 40, "R": 50.0, "exp_thr": 5.0, "exp_bin": true, "source": "KC2023", "note": "CL1	(mv)", "mw": null, "orig_ambiguous": false, "orig_multi_value": true, "og_uid": "C9JW69;M0R1Q8", "sequence": "MSPKRIAKRRSPPADAIPKSKKVKDTRAAASRRVPGARSCQVSHRSHSTEPGLVLTLGQGDVGQLGLGENVMERKKPALVSIPEDVVQAEAGGMHTVCLSKSGQVYSFGCNDEGALGRDTSVEGSEMVPGKVELQEKVVQVSAGDSHTAALTDDGRVFLWGSFRDNNGVIGLLEPMKKSMVPVQVQLDVPVVKVASGNDHLVMLTADGDLYTLGCGEQGQLGRVPELFANRGGRQGLERLLVPKCVMLKSRGSRGHVRFQDAFCGAYFTFAISHEGHVYGFGLSNYHQL…
	{"uid": "B4DEE2", "roi": 11, "R": 50.0, "exp_thr": 5.0, "exp_bin": true, "source": "KC2023", "note": "CL1	(mv)", "mw": null, "orig_ambiguous": false, "orig_multi_value": true, "og_uid": "H0YNL7;B4DEE2;H0YKZ3;H0YMT4;H0YLY9;Q14442", "sequence": "MEDERSFSDICGGRLALQRRYYSPSCREFCLSCPRLSLRSLTAVTCTVWLAAYGLFTLCENSMILSAAIFITLLGLLGYLHFVKIDQETLLIIDSLGIQMTSSYASGKESTTFIEMGKVKDIVINEAIYMVSI", "mapped_roi": 11, "window_seq": "MEDERSFSDICGGRLALQRRY"}
	{"uid": "H0YNL7", "roi": 11, "R": 50.0, "exp_thr": 5.0, "exp_bin": true, "source": "KC2023", "note": "CL1	(mv)", "mw": null, "orig_ambiguous": false, "orig_multi_value": true, "og_uid": "H0YNL7;B4DEE2;H0YKZ3;H0YMT4;H0YLY9;Q14442", "sequence": "MEDERSFSDICGGRLALQRRYYSPSCREFCLSCPRLSLRSLTAVTCTVWLAAYGLFTLCEHDPLCCHLHHPLRSAWLSPFCED", "mapped_roi": 11, "window_seq": "MEDERSFSDICGGRLALQRRY"}
	{"uid": "H0YMT4", "roi": 11, "R": 50.0, "exp_thr": 5.0, "exp_bin": true, "source": "KC2023", "note": "CL1	(mv)", "mw": null, "orig_ambiguous": false, "orig_multi_value": true, "og_uid": "H0YNL7;B4DEE2;H0YKZ3;H0YMT4;H0YLY9;Q14442", "sequence": "MEDERSFSDICGGRLALQRRYYSPSCREFCLSCPRLSLRSLTAVTCTVWLAAYGLFTLCEMTSSYASGKESTTFIEMGKVKDIVINEAIYMQKVIYYLCILLKDPVEPHGISQVVPVFQRQSLTLSPRLECSDNHHSLQPPPPRLKKSSCLSLLRTWDYRCAPSRLANFFFLFLVEMRSCHVA", "mapped_roi": 11, "window_seq": "MEDERSFSDICGGRLALQRRY"}
	{"uid": "H0YKZ3", "roi": 11, "R": 50.0, "exp_thr": 5.0, "exp_bin": true, "source": "KC2023", "note": "CL1	(mv)", "mw": null, "orig_ambiguous": false, "orig_multi_value": true, "og_uid": "H0YNL7;B4DEE2;H0YKZ3;H0YMT4;H0YLY9;Q14442", "sequence": "MEDERSFSDICGGRLALQRRYYSPSCREFCLSCPRLSLRSLTAVTCTVWLAAYGLFTLCENSMILSAAIFITLLGKESTTFIEMGKVKDIVINEAIYMQKVIYYLCILLKDPVEPHGISQVVPVFQRQSLTLSPRLE", "mapped_roi": 11, "window_seq": "MEDERSFSDICGGRLALQRRY"}
	{"uid": "H0YLY9", "roi": 11, "R": 50.0, "exp_thr": 5.0, "exp_bin": true, "source": "KC2023", "note": "CL1	(mv)", "mw": null, "orig_ambiguous": false, "orig_multi_value": true, "og_uid": "H0YNL7;B4DEE2;H0YKZ3;H0YMT4;H0YLY9;Q14442", "sequence": "MEDERSFSDICGGRLALQRRYYSPSCREFCLSCPRLSLRSLTAVTCTVWLAAYGLFTLCENSMILSAAIFITLLGLLGYLHFVKIDQETLLIIDSLGIQMTSSYASGKESTTFIEMGKVKDIVINEAIYMKVIYYLCILLKDPVEPHGISQVVPVFQSAKPRLDCLIEVYRSCQEILAHQKATSTSP", "mapped_roi": 11, "window_seq": "MEDERSFSDICGGRLALQRRY"}
	{"uid": "A0A494BZT8", "roi": 426, "R": 50.0, "exp_thr": 5.0, "exp_bin": true, "source": "KC2023", "note": "CL1	(mv)", "mw": null, "orig_ambiguous": false, "orig_multi_value": true, "og_uid": "A0A494BZT8;Q9Y6A5;A0A494C117;H0Y8F2", "sequence": "MSLQVLNDKNVSNEKNTENCDFLFSPPEVTGRSSVLRVSQKENVPPKNLAKAMKVTFQTPLRDPQTHRILSPSMASKLEAPFTQDDTLGLENSHPVWTQKENQQLIKEVDAKTTHGILQKPVEADTDLLGDASPAFGSGSSSESGPGALADLDCSSSSQSPGSSENQMVSPGKVSGSPEQAVEENLSSYSLDRRVTPASETLEDPCRTESQHKAETPHGAEEECKAETPHGAEEECRHGGVCAPAAVATSPPGAIPKEACGGAPLQG…
	{"uid": "A0A494BZT8", "roi": 206, "R": 3.306991165, "exp_thr": 5.0, "exp_bin": false, "source": "KC2023", "note": "CL1- (mv)", "mw": null, "orig_ambiguous": false, "orig_multi_value": true, "og_uid": "A0A494BZT8;Q9Y6A5;E7EMT0;C9JA91", "sequence": "MSLQVLNDKNVSNEKNTENCDFLFSPPEVTGRSSVLRVSQKENVPPKNLAKAMKVTFQTPLRDPQTHRILSPSMASKLEAPFTQDDTLGLENSHPVWTQKENQQLIKEVDAKTTHGILQKPVEADTDLLGDASPAFGSGSSSESGPGALAD…
	{"uid": "A0A494BZT8", "roi": 236, "R": 0.774234917, "exp_thr": 5.0, "exp_bin": false, "source": "KC2023", "note": "CL1- (mv)", "mw": null, "orig_ambiguous": false, "orig_multi_value": true, "og_uid": "A0A494BZT8;Q9Y6A5;E7EMT0", "sequence": "MSLQVLNDKNVSNEKNTENCDFLFSPPEVTGRSSVLRVSQKENVPPKNLAKAMKVTFQTPLRDPQTHRILSPSMASKLEAPFTQDDTLGLENSHPVWTQKENQQLIKEVDAKTTHGILQKPVEADTDLLGDASPAFGSGSSSESGPGALADLDCSSSS…
	{"uid": "A0A494BZT8", "roi": 502, "R": 0.0, "exp_thr": 5.0, "exp_bin": false, "source": "KC2023", "note": "CL1- (mv)", "mw": null, "orig_ambiguous": false, "orig_multi_value": true, "og_uid": "A0A494BZT8;Q9Y6A5;A0A087WUE2;A0A494C117", "sequence": "MSLQVLNDKNVSNEKNTENCDFLFSPPEVTGRSSVLRVSQKENVPPKNLAKAMKVTFQTPLRDPQTHRILSPSMASKLEAPFTQDDTLGLENSHPVWTQKENQQLIKEVDAKTTHGILQKPVEADTDLLGDASPAFGSGSSSESGPGALAD…
	{"uid": "Q5VZU9", "roi": 28, "R": 50.0, "exp_thr": 5.0, "exp_bin": true, "source": "KC2023", "note": "CL1	(mv)", "mw": null, "orig_ambiguous": false, "orig_multi_value": true, "og_uid": "Q5VZU9;P29144;A0A494C1B8;A0A494C0U1;A0A494C1S4", "sequence": "MATAATEEPFPFHGLLPKKETGAASFLCRYPEYDGRGVLIAVLDTGVDPGAPGMQVTTDGKPKIVDIIDTTGSGDVNTATEVEPKDGEIVGLSGRVLKIPASWTNPSGKYHIGIKNGYDFYPKALKERIQKERKEKIWDPVHRVALAEACRKQEEFDVANNGSSQANKLIKEELQSQVELLNSFEKKYSDPGPVYDCLVWHDGEVWRACIDSNEDGDLSKSTVLRNYKEAQEYGSFGTAEMLNYSVNIYDDGNLLS…
	{"uid": "J3KTA4", "roi": 200, "R": 50.0, "exp_thr": 5.0, "exp_bin": true, "source": "KC2023", "note": "CL1	(mv)", "mw": null, "orig_ambiguous": false, "orig_multi_value": true, "og_uid": "A0A1X7SBZ2;A0A5H1ZRQ2;Q92841;J3KTA4;P17844;A0A0G2JLI4;A0A7I2V507;A0A7I2V2S0;A0A7I2V5F5;J3KRZ1;J3QRQ7", "sequence": "MKAGRFEADEGTSVRFGAPRFGGSRAGPLSGKKFGNPGEKLVKKKWNLDELPKFEKNFYQEHPDLARRTAQEVETYRRSKEITVRGHNCPKPVLNFYEANFPANVMDVIARQNFTEPTAIQAQGWPVALSGLDMVGVAQTGSGKTLSYLLPAIVHINHQPFLERGDGPICLVLAPTRELAQQVQQVAAEYCRACRLKSTCIY…
	{"uid": "J3KTA4", "roi": 191, "R": 0.964351005, "exp_thr": 5.0, "exp_bin": false, "source": "KC2023", "note": "CL1- (mv)", "mw": null, "orig_ambiguous": false, "orig_multi_value": true, "og_uid": "J3KTA4;P17844;A0A0G2JLI4;A0A7I2V507;A0A7I2V2S0;A0A7I2V5F5;J3KRZ1;J3QRQ7", "sequence": "MKAGRFEADEGTSVRFGAPRFGGSRAGPLSGKKFGNPGEKLVKKKWNLDELPKFEKNFYQEHPDLARRTAQEVETYRRSKEITVRGHNCPKPVLNFYEANFPANVMDVIARQNFT…
	{"uid": "J3KTA4", "roi": 234, "R": 0.294367449, "exp_thr": 5.0, "exp_bin": false, "source": "KC2023", "note": "CL1- (mv)", "mw": null, "orig_ambiguous": false, "orig_multi_value": true, "og_uid": "J3KTA4;P17844;A0A0G2JLI4;A0A7I2V507;A0A7I2V2S0;A0A7I2V5F5;J3QSF1;J3KRZ1", "sequence": "MKAGRFEADEGTSVRFGAPRFGGSRAGPLSGKKFGNPGEKLVKKKWNLDELPKFEKNFYQEHPDLARRTAQEVETYRRSKEITVRGHNCPKPVLNFYEANFPANVMDVIARQNFT…
	{"uid": "C9J2I1", "roi": 3, "R": 5.694995482, "exp_thr": 5.0, "exp_bin": true, "source": "KC2023", "note": "CL1	(mv)", "mw": null, "orig_ambiguous": false, "orig_multi_value": true, "og_uid": "C9J2I1;G5E9V6;Q8IUR7;C9JAA7;C9JBY2", "sequence": "MACLLETPIRMSVLSRHEKCCNWKQQAESQSHCFRSCSKDATVIPHLMALLSRSRYTQEYICQIFSHCCKGPDHQTILFNHGAVQNIAHLLTSLSYKVRMQALKCFSVLAFENPQVSMTLVNVLVDGELLPQIFVKMLQRDKPIEMQLTSAKCLTYMCRAGAIRTDDNCIVLKTLPCLVRMCSKERLLEERVEGAETLAYLIEPDVELQRIASITDHLIAMLADYFKYPSSVSAITDIKRLDHDLKHAHELRQAAFKLYASLGANDED…
	{"uid": "A0A494C1S4", "roi": 28, "R": 50.0, "exp_thr": 5.0, "exp_bin": true, "source": "KC2023", "note": "CL1	(mv)", "mw": null, "orig_ambiguous": false, "orig_multi_value": true, "og_uid": "Q5VZU9;P29144;A0A494C1B8;A0A494C0U1;A0A494C1S4", "sequence": "MATAATEEPFPFHGLLPKKETGAASFLCRYPEYDGRGVLIAVLDTGVDPGAPGMQVTTDGKPKIVDIIDTTGSGDVNTATEVEPKDGEIVGLSGRVLKIPASWTNPSGKYHIGIKNGYDFYPKALKERIQKERKEKIWDPVHRVALAEACRKQEEFDVANNGSSQAGVQWCDLGSLQPLPSGFKLFSPQPPE", "mapped_roi": 28, "window_seq": "KKETGAASFLCRYPEYDGRGV"}
	{"uid": "C9JBY2", "roi": 3, "R": 5.694995482, "exp_thr": 5.0, "exp_bin": true, "source": "KC2023", "note": "CL1	(mv)", "mw": null, "orig_ambiguous": false, "orig_multi_value": true, "og_uid": "C9J2I1;G5E9V6;Q8IUR7;C9JAA7;C9JBY2", "sequence": "MACLLETPIRMSVLSEVTASSRHYVDRLFDPDPQKVLQGVIDMKNAVIGNNKQKANLIVLGAVPRLLYLLQQETSSTELKTECAVVLGSLAMGTENNVKSLLDCHIIPALLQGLLSPDLKFIEACLRCLRTIFTSPVTPEELLYTGPDHQTILFNHGAVQNIAHLLTSLSYKVRMQALKCFSVLAFENPQVSMTLVNVLVDGELLPQIFVKMLQRDKPIEMQLTSAK", "mapped_roi": 3, "window_seq": "MACLLE…
	{"uid": "E9PH82", "roi": 292, "R": 50.0, "exp_thr": 5.0, "exp_bin": true, "source": "KC2023", "note": "CL1	(mv)", "mw": null, "orig_ambiguous": false, "orig_multi_value": true, "og_uid": "Q52LJ0;Q8NCA5;E9PH82", "sequence": "MECDLMETDILESLEDLGYKGPLLEDGALSQAVSAGASSPEFTKLCAWLVSELRVLCKLEENVQATNSPSEAEEFQLEVSGLLGEMNCPYLSLTSGDVTKRLLIQKNCLLLLTYLISELEAARMLCVNAPPKKAQEGGGSEVFQELKGICIALGMSKPPANITMFQFFSGIEKKLKETLAKVPPNHVGKPLLKKPMGPAHWEKIEAINQAIANEYEVRRKLLIKRLDVTVQSFGWSDRAKSQTEKLAKVYQPKRSVLSPKTTISVAHLLAARQDLSKILRTS…
	{"uid": "E9PH82", "roi": 3, "R": 1.097368607, "exp_thr": 5.0, "exp_bin": false, "source": "KC2023", "note": "CL1- (mv)", "mw": null, "orig_ambiguous": false, "orig_multi_value": true, "og_uid": "Q8NCA5;E9PH82;C9J3G8", "sequence": "MECDLMETDILESLEDLGYKGPLLEDGALSQAVSAGASSPEFTKLCAWLVSELRVLCKLEENVQATNSPSEAEEFQLEVSGLLGEMNCPYLSLTSGDVTKRLLIQKNCLLLLTYLISELEAARMLCVNAPPKKAQEGGGSEVFQELKGICIALGMSKPPANITMFQFF…
	{"uid": "K7ELG9", "roi": 20, "R": 50.0, "exp_thr": 5.0, "exp_bin": true, "source": "KC2023", "note": "CL1	(mv)", "mw": null, "orig_ambiguous": false, "orig_multi_value": true, "og_uid": "K7ELG9;Q3MHD2", "sequence": "MAAPPGEYFSVGSQVSCRTCQEQRLQGEVVAFDYQSKMLALKCPSSSGKPNHADILLINLQYVSEVEIINDRTETPPPLASLNVSKLASKARTEKEEKLSQAYAISAGVSLEGQQLFQTIHKTIKDCKWQEKNIVVMEEVVITPPYQVENCKGKEGSALSHVRKIRQSLALSPTLECSGAISAHCNLRLPGSSDSPASASRVPGTTGVCHHTRLEMGFHHVGQAGLELLT", "mapped_roi": 20, "window_seq": "SVGSQVSCRTCQEQRLQGEVV"}
	{"uid": "C9JEJ2", "roi": 346, "R": 50.0, "exp_thr": 5.0, "exp_bin": true, "source": "KC2023", "note": "CL1	(mv)", "mw": null, "orig_ambiguous": false, "orig_multi_value": true, "og_uid": "C9JEJ2;P49585", "sequence": "MDAQCSAKVNARKRRKEAPGPNGATEEDGVPSKVQRCAVGLRQPAPFSDEIEVDFSKPYVRVTMEEASRGTPCERPVRVYADGIFDLFHSGHARALMQAKNLFPNTYLIVGVCSDELTHNFKGFTVMNENERYDAVQHCRYVDEVVRNAPWTLTPEFLAEHRIDFVAHDDIPYSSAGSDDVYKHIKEAGMFAPTQRTEGISTSDIITRIVRDYDVYARRNLQRGYTAKELNVSFINEKKYHLQERVDKVKKKVKDVEEKSKEFVQKVEEKSIDLIQKWEEKSREFIGSF…
	{"uid": "C9JEJ2", "roi": 5, "R": 2.018283259, "exp_thr": 5.0, "exp_bin": false, "source": "KC2023", "note": "CL1- (mv)", "mw": null, "orig_ambiguous": false, "orig_multi_value": true, "og_uid": "C9JEJ2;P49585;C9J050;C9J2E1;C9JPY0;C9JVS0;F8WAZ5;F8WBU2", "sequence": "MDAQCSAKVNARKRRKEAPGPNGATEEDGVPSKVQRCAVGLRQPAPFSDEIEVDFSKPYVRVTMEEASRGTPCERPVRVYADGIFDLFHSGHARALMQAKNLFPNTYLIVGVCSDELTHNFKGFTVMNENERY…
	{"uid": "B7Z332", "roi": 18, "R": 4.7697143, "exp_thr": 5.0, "exp_bin": false, "source": "KC2023", "note": "CL1- (mv)", "mw": null, "orig_ambiguous": false, "orig_multi_value": true, "og_uid": "Q00765;B7Z332;B7Z510;H0Y8J8", "sequence": "MSAAMRERFDRFLHEKNCMTDLLAKLEAKTGVNRSFIALGVIGLVALYLVFGYGASLLCNLIGFGYPAYISVASCCGAWPRALLMGLNCSTSASSVLSS", "mapped_roi": 18, "window_seq": "RFDRFLHEKNCMTDLLAKLEA"}
	{"uid": "H0YDT6", "roi": 256, "R": 24.0165921, "exp_thr": 5.0, "exp_bin": true, "source": "KC2023", "note": "CL1	(mv)", "mw": null, "orig_ambiguous": false, "orig_multi_value": true, "og_uid": "H0YDT6;O00303", "sequence": "MATPAVPVSAPPATPTPVPAAAPASVPAPTPAPAAAPVPAAAPASSSDPAAAAAATAAPGQTPASAQAPAQTPAPALPGPALPGPFPGGRVVRLHPVILASIVDSYERRNEGAARVIGTLLGTVDKHSVEVTNCFSVPHNESEDEVAVDMEFAKNMYELHKKVSPNELILGWYATGHDITEHSVLIHEYYSREAPNPIHLTVDTSLQNGRMSIKAYVSTLMGVPGRTMGVMFTPLTVKYAYYDTERIGVDLIMKTCFSPNRVIGLSSDLQQVGGASARIQDALSTVLQY…
	{"uid": "B7Z510", "roi": 18, "R": 4.7697143, "exp_thr": 5.0, "exp_bin": false, "source": "KC2023", "note": "CL1- (mv)", "mw": null, "orig_ambiguous": false, "orig_multi_value": true, "og_uid": "Q00765;B7Z332;B7Z510;H0Y8J8", "sequence": "MSAAMRERFDRFLHEKNCMTDLLAKLEAKTGVNRSFIALGVIGLVALYLVFGYGASLLCNLIGFGYPAYISIKAIESPNKEDDTQWLTYWVVYGVFSIAEFFSDIFLSWFPFYYMLKRRKLP", "mapped_roi": 18, "window_seq": "RFDR…
	{"uid": "Q92901", "roi": 253, "R": 9.624488343, "exp_thr": 5.0, "exp_bin": true, "source": "KC2023", "note": "CL1	(mv)", "mw": null, "orig_ambiguous": false, "orig_multi_value": true, "og_uid": "P39023;G5E9G0;H7C422;B5MCW2;Q92901", "sequence": "MSHRKFSAPRHGHLGFLPHKRSHRHRGKVKTWPRDDPSQPVHLTAFLGYKAGMTHTLREVHRPGLKISKREEVEAVTIVETPPLVVVGVVGYVATPRGLRSFKTIFAEHLSDECRRRFYKDWHKSKKKAFTKACKRWRDTDGKKQLQKDFAAMKKYCKVIRVIVHTQMKLLPFRQKKAHIMEIQLNGGTVAEKVAWAQARLEKQVPVHSVFSQSEVIDVIAVTKGRGVKGVTSRWHTKKLPRKTHKGLRKVACIGAWHPARVGCSIAR…
	{"uid": "Q92901", "roi": 253, "R": 0.805042017, "exp_thr": 5.0, "exp_bin": false, "source": "KC2023", "note": "CL1- (mv)", "mw": null, "orig_ambiguous": false, "orig_multi_value": true, "og_uid": "P39023;G5E9G0;H7C422;B5MCW2;Q92901", "sequence": "MSHRKFSAPRHGHLGFLPHKRSHRHRGKVKTWPRDDPSQPVHLTAFLGYKAGMTHTLREVHRPGLKISKREEVEAVTIVETPPLVVVGVVGYVATPRGLRSFKTIFAEHLSDECRRRFYKDWHKSKKKAFTKACKRWRDTDGKKQLQKDFAA…
	{"uid": "Q92901", "roi": 253, "R": 1.062433594, "exp_thr": 4.0, "exp_bin": false, "source": "KC2023", "note": "CL-Sc- (mv)", "mw": null, "orig_ambiguous": false, "orig_multi_value": true, "og_uid": "P39023;Q92901", "sequence": "MSHRKFSAPRHGHLGFLPHKRSHRHRGKVKTWPRDDPSQPVHLTAFLGYKAGMTHTLREVHRPGLKISKREEVEAVTIVETPPLVVVGVVGYVATPRGLRSFKTIFAEHLSDECRRRFYKDWHKSKKKAFTKACKRWRDTDGKKQLQKDFAAMKKYCKVIRVIVHTQMKLL…
	{"uid": "Q92901", "roi": 253, "R": 0.900484299, "exp_thr": 4.0, "exp_bin": false, "source": "KC2023", "note": "CL-Sc- (mv)", "mw": null, "orig_ambiguous": false, "orig_multi_value": true, "og_uid": "P39023;Q92901", "sequence": "MSHRKFSAPRHGHLGFLPHKRSHRHRGKVKTWPRDDPSQPVHLTAFLGYKAGMTHTLREVHRPGLKISKREEVEAVTIVETPPLVVVGVVGYVATPRGLRSFKTIFAEHLSDECRRRFYKDWHKSKKKAFTKACKRWRDTDGKKQLQKDFAAMKKYCKVIRVIVHTQMKLL…
	{"uid": "J9JIH8", "roi": 338, "R": 7.187165466, "exp_thr": 5.0, "exp_bin": true, "source": "KC2023", "note": "CL1	(mv)", "mw": null, "orig_ambiguous": false, "orig_multi_value": true, "og_uid": "A0A7P0TA59;J9JIH8;A0A7P0Z413;Q7Z6J9;E7EN92", "sequence": "MEPEPEPAAVEVPAGRVLSARELFAARSRSQKLPQRSHGPKDFLPDGSAAQAERLRRCREELWQLLAEQRVERLGSLVAAEWRPEEGFVELKSPAGKFWQTMGFSEQGRQRLHPEEALYLLECGSIHLFHQDLPLSIQEAYQLLLTDHTVTFLQYQVFSHLKRLGYVVRRFQPSSVLSPYERQLNLDASVQHLEDGDGKRKRSSSSPRSINKKAKALDNSLQPKSLAASSPPPCSQPSQCPEEKPQESSPMKGPGGPFQL…
	{"uid": "J9JIH8", "roi": 277, "R": 2.366713767, "exp_thr": 5.0, "exp_bin": false, "source": "KC2023", "note": "CL1- (mv)", "mw": null, "orig_ambiguous": false, "orig_multi_value": true, "og_uid": "A0A7P0TA59;J9JIH8;A0A7P0Z413;Q7Z6J9;E7EN92", "sequence": "MEPEPEPAAVEVPAGRVLSARELFAARSRSQKLPQRSHGPKDFLPDGSAAQAERLRRCREELWQLLAEQRVERLGSLVAAEWRPEEGFVELKSPAGKFWQTMGFSEQGRQRLHPEEALYLLECGSIHLFHQDLPLSIQEAYQLL…
	{"uid": "A0A7P0Z413", "roi": 338, "R": 7.187165466, "exp_thr": 5.0, "exp_bin": true, "source": "KC2023", "note": "CL1	(mv)", "mw": null, "orig_ambiguous": false, "orig_multi_value": true, "og_uid": "A0A7P0TA59;J9JIH8;A0A7P0Z413;Q7Z6J9;E7EN92", "sequence": "MEPEPEPAAVEVPAGRVLSARELFAARSRSQKLPQRSHGPKDFLPDGSAAQAERLRRCREELWQLLAEQRVERLGSLVAAEWRPEEGFVELKSPAGKFWQTMGFSEQGRQRLHPEEALYLLECGSIHLFHQDLPLSIQEAYQLLLTDHTVTFLQYQVFSHLKRLGYVVRRFQPSSVLSPYERQLNLDASVQHLEDGDGKRKRSSSSPRSINKKAKALDNSLQPKSLAASSPPPCSQPSQCPEEKPQESSPMKGPGGPFQL…
	{"uid": "A0A7P0Z413", "roi": 277, "R": 2.366713767, "exp_thr": 5.0, "exp_bin": false, "source": "KC2023", "note": "CL1- (mv)", "mw": null, "orig_ambiguous": false, "orig_multi_value": true, "og_uid": "A0A7P0TA59;J9JIH8;A0A7P0Z413;Q7Z6J9;E7EN92", "sequence": "MEPEPEPAAVEVPAGRVLSARELFAARSRSQKLPQRSHGPKDFLPDGSAAQAERLRRCREELWQLLAEQRVERLGSLVAAEWRPEEGFVELKSPAGKFWQTMGFSEQGRQRLHPEEALYLLECGSIHLFHQDLPLSIQEA…
	{"uid": "A0A7P0TA59", "roi": 338, "R": 7.187165466, "exp_thr": 5.0, "exp_bin": true, "source": "KC2023", "note": "CL1	(mv)", "mw": null, "orig_ambiguous": false, "orig_multi_value": true, "og_uid": "A0A7P0TA59;J9JIH8;A0A7P0Z413;Q7Z6J9;E7EN92", "sequence": "MEPEPEPAAVEVPAGRVLSARELFAARSRSQKLPQRSHGPKDFLPDGSAAQAERLRRCREELWQLLAEQRVERLGSLVAAEWRPEEGFVELKSPAGKFWQTMGFSEQGRQRLHPEEALYLLECGSIHLFHQDLPLSIQEAYQLLLTDHTVTFLQYQVFSHLKRLGYVVRRFQPSSVLSPYERQLNLDASVQHLEDGDGKRKRSSSSPRSINKKAKALDNSLQPKSLAASSPPPCSQPSQCPEEKPQESSPMKGPGGPFQL…
	{"uid": "A0A7P0TA59", "roi": 277, "R": 2.366713767, "exp_thr": 5.0, "exp_bin": false, "source": "KC2023", "note": "CL1- (mv)", "mw": null, "orig_ambiguous": false, "orig_multi_value": true, "og_uid": "A0A7P0TA59;J9JIH8;A0A7P0Z413;Q7Z6J9;E7EN92", "sequence": "MEPEPEPAAVEVPAGRVLSARELFAARSRSQKLPQRSHGPKDFLPDGSAAQAERLRRCREELWQLLAEQRVERLGSLVAAEWRPEEGFVELKSPAGKFWQTMGFSEQGRQRLHPEEALYLLECGSIHLFHQDLPLSIQEA…
	{"uid": "A0A0A0MTR7", "roi": 1614, "R": 6.47960209, "exp_thr": 5.0, "exp_bin": true, "source": "KC2023", "note": "CL1	(mv)", "mw": null, "orig_ambiguous": false, "orig_multi_value": true, "og_uid": "A0A0A0MTR7;A0A0A0MTC1;Q63HN8", "sequence": "MECPSCQHVSKEETPKFCSQCGERLPPAAPIADSENNNSTMASASEGEMECGQELKEEGGPCLFPGSDSWQENPEEPCSKASWTVQESKKKKRKKKKKGNKSASSELASLPLSPASPCHLTLLSNPWPQDTALPHSQAQQSGPTGQPSQPPGTATTPLEGDGLSAPTEVGDSPLQAQALGEAGVATGSEAQSSPQFQDHTEGEDQDASIPSGGRGLSQEGTGPPTSAGEGHSRTEDAAQELLLPESKGGSSEPGTELQTTEQQAGASASMAVDA…
	{"uid": "A0A0A0MTR7", "roi": 310, "R": 1.193798683, "exp_thr": 5.0, "exp_bin": false, "source": "KC2023", "note": "CL1- (mv)", "mw": null, "orig_ambiguous": false, "orig_multi_value": true, "og_uid": "A0A0A0MTR7;A0A0A0MTC1;Q63HN8", "sequence": "MECPSCQHVSKEETPKFCSQCGERLPPAAPIADSENNNSTMASASEGEMECGQELKEEGGPCLFPGSDSWQENPEEPCSKASWTVQESKKKKRKKKKKGNKSASSELASLPLSPASPCHLTLLSNPWPQDTALPHSQAQQSGPTGQPSQPPGTA…
	{"uid": "A0A0A0MTR7", "roi": 3084, "R": 0.684323167, "exp_thr": 5.0, "exp_bin": false, "source": "KC2023", "note": "CL1- (mv)", "mw": null, "orig_ambiguous": false, "orig_multi_value": true, "og_uid": "A0A0A0MTR7;A0A0A0MTC1;Q63HN8", "sequence": "MECPSCQHVSKEETPKFCSQCGERLPPAAPIADSENNNSTMASASEGEMECGQELKEEGGPCLFPGSDSWQENPEEPCSKASWTVQESKKKKRKKKKKGNKSASSELASLPLSPASPCHLTLLSNPWPQDTALPHSQAQQSGPTGQPSQPPGT…
	{"uid": "A0A0A0MTR7", "roi": 614, "R": 0.191747302, "exp_thr": 5.0, "exp_bin": false, "source": "KC2023", "note": "CL1- (mv)", "mw": null, "orig_ambiguous": false, "orig_multi_value": true, "og_uid": "A0A0A0MTR7;A0A0A0MTC1;Q63HN8", "sequence": "MECPSCQHVSKEETPKFCSQCGERLPPAAPIADSENNNSTMASASEGEMECGQELKEEGGPCLFPGSDSWQENPEEPCSKASWTVQESKKKKRKKKKKGNKSASSELASLPLSPASPCHLTLLSNPWPQDTALPHSQAQQSGPTGQPSQPPGTA…
	{"uid": "G5E9V6", "roi": 3, "R": 5.694995482, "exp_thr": 5.0, "exp_bin": true, "source": "KC2023", "note": "CL1	(mv)", "mw": null, "orig_ambiguous": false, "orig_multi_value": true, "og_uid": "C9J2I1;G5E9V6;Q8IUR7;C9JAA7;C9JBY2", "sequence": "MACLLETPIRMSVLSEVTASSRHYVDRLFDPDPQKVLQGVIDMKNAVIGNNKQKANLIVLGAVPRLLYLLQQETSSTELKTECAVVLGSLAMGTENNVKSLLDCHIIPALLQGLLSPDLKFIEACLRCLRTIFTSPVTPEELLYTDATVIPHLMALLSRSRYTQEYICQIFSHCCKGPDHQTILFNHGAVQNIAHLLTSLSYKVRMQALKCFSVLAFENPQVSMTLVNVLVDGELLPQIFVKMLQRDKPIEMQLTSAKCLTYMCRAGA…
	{"uid": "A0A7I2V2S0", "roi": 200, "R": 50.0, "exp_thr": 5.0, "exp_bin": true, "source": "KC2023", "note": "CL1	(mv)", "mw": null, "orig_ambiguous": false, "orig_multi_value": true, "og_uid": "A0A1X7SBZ2;A0A5H1ZRQ2;Q92841;J3KTA4;P17844;A0A0G2JLI4;A0A7I2V507;A0A7I2V2S0;A0A7I2V5F5;J3KRZ1;J3QRQ7", "sequence": "MSGYSSDRDRGRDRGFGAPRFGGSRAGPLSGKKFGNPGEKLVKKKWNLDELPKFEKNFYQEHPDLARRTAQEVETYRRSKEITVRGHNCPKPVLNFYEANFPANVMDVIARQNFTEPTAIQAQGWPVALSGLDMVGVAQTGSGKTLSYLLPAIVHINHQPFLERGDGPICLVLAPTRELAQQVQQVAAEYCRACRLKSTCIY…
	{"uid": "A0A7I2V2S0", "roi": 191, "R": 0.964351005, "exp_thr": 5.0, "exp_bin": false, "source": "KC2023", "note": "CL1- (mv)", "mw": null, "orig_ambiguous": false, "orig_multi_value": true, "og_uid": "J3KTA4;P17844;A0A0G2JLI4;A0A7I2V507;A0A7I2V2S0;A0A7I2V5F5;J3KRZ1;J3QRQ7", "sequence": "MSGYSSDRDRGRDRGFGAPRFGGSRAGPLSGKKFGNPGEKLVKKKWNLDELPKFEKNFYQEHPDLARRTAQEVETYRRSKEITVRGHNCPKPVLNFYEANFPANVMDVIAR…
	{"uid": "A0A7I2V2S0", "roi": 234, "R": 0.294367449, "exp_thr": 5.0, "exp_bin": false, "source": "KC2023", "note": "CL1- (mv)", "mw": null, "orig_ambiguous": false, "orig_multi_value": true, "og_uid": "J3KTA4;P17844;A0A0G2JLI4;A0A7I2V507;A0A7I2V2S0;A0A7I2V5F5;J3QSF1;J3KRZ1", "sequence": "MSGYSSDRDRGRDRGFGAPRFGGSRAGPLSGKKFGNPGEKLVKKKWNLDELPKFEKNFYQEHPDLARRTAQEVETYRRSKEITVRGHNCPKPVLNFYEANFPANVMDVIAR…
	{"uid": "G3V3E6", "roi": 166, "R": 4.906500341, "exp_thr": 5.0, "exp_bin": false, "source": "KC2023", "note": "CL1- (mv)", "mw": null, "orig_ambiguous": false, "orig_multi_value": true, "og_uid": "Q96HE7;G3V3E6;G3V5B3", "sequence": "MGRGWGFLFGLLGAVWLLSSGHGEEQPPETAAQRCFCQVSGYLDDCTCDVETIDRFNNYRLFPRLQKLLESDYFRYYKVNLKRPCPFWNDISQCGRRDCAVKPCQSDEVPDGIKSASYKYSEEANNLIEECEQAERLGAVDESLSEETQKAVLQWTKHDDSSDNFC…
	{"uid": "Q5JR95", "roi": 80, "R": 4.623221895, "exp_thr": 5.0, "exp_bin": false, "source": "KC2023", "note": "CL1- (mv)", "mw": null, "orig_ambiguous": false, "orig_multi_value": true, "og_uid": "Q5JR95;P62241", "sequence": "MGISRDNWHKRRKTGGKRKPYHKKRKYELGRPAANTKIGPRRIHTVRVRGGCTRKTRIIDVVYNASNNELVRTKTLVKNCIVLIDSTPYRQWYESHYALPLGRKKGAKLTPEEEEILNKKRSKKIQKKYDERKKNAKISSLLEEQFQQGKLLACIASRPGQCGRADGYVLEGKE…
	{"uid": "Q5JR95", "roi": 154, "R": 0.662770212, "exp_thr": 5.0, "exp_bin": false, "source": "KC2023", "note": "CL1- (mv)", "mw": null, "orig_ambiguous": false, "orig_multi_value": true, "og_uid": "Q5JR95;P62241", "sequence": "MGISRDNWHKRRKTGGKRKPYHKKRKYELGRPAANTKIGPRRIHTVRVRGGCTRKTRIIDVVYNASNNELVRTKTLVKNCIVLIDSTPYRQWYESHYALPLGRKKGAKLTPEEEEILNKKRSKKIQKKYDERKKNAKISSLLEEQFQQGKLLACIASRPGQCGRADGYVLEGK…
	{"uid": "D6RIC3", "roi": 36, "R": 4.387389794, "exp_thr": 5.0, "exp_bin": false, "source": "KC2023", "note": "CL1- (mv)", "mw": null, "orig_ambiguous": false, "orig_multi_value": true, "og_uid": "D6RIC3;A0A0C4DGU5;A0A087X2G6;Q9Y3C1;D6RC60", "sequence": "MPKAKGKTRRQKFGYSVNRKRLNRNARRKAAPRIECSHIRHAWDHAKSVRQNLAEMGLAVDPNRAVPLRKRKVKAMEVDIEERPKELVRKPYVLNDLEAEASLPEKKGNTLSRDLIDYVRYMVENHGEDYKVSGSGPVGWLGRRP…
	{"uid": "D6RC60", "roi": 36, "R": 4.387389794, "exp_thr": 5.0, "exp_bin": false, "source": "KC2023", "note": "CL1- (mv)", "mw": null, "orig_ambiguous": false, "orig_multi_value": true, "og_uid": "D6RIC3;A0A0C4DGU5;A0A087X2G6;Q9Y3C1;D6RC60", "sequence": "MPKAKGKTRRQKFGYSVNRKRLNRNARRKAAPRIECSHIRHAWDHAKSVRQNLAEMGLAVDPNRAVPLRKRKILLVSRALFSAGEGHGGGHRGEA", "mapped_roi": 36, "window_seq": "ARRKAAPRIECSHI…
	{"uid": "A0A0C4DGU5", "roi": 36, "R": 4.387389794, "exp_thr": 5.0, "exp_bin": false, "source": "KC2023", "note": "CL1- (mv)", "mw": null, "orig_ambiguous": false, "orig_multi_value": true, "og_uid": "D6RIC3;A0A0C4DGU5;A0A087X2G6;Q9Y3C1;D6RC60", "sequence": "MPKAKGKTRRQKFGYSVNRKRLNRNARRKAAPRIECSHIRHAWDHAKSVRQNLAEMGLAVDPNRAVPLRKRKVKAMEVDIEERPKELVRKPYVLNDLEAEASLPEKKGNTLSRDLIDYVRYMVENHGEDYKSGKTSSILCR…
	{"uid": "A0A7P0TA13", "roi": 4216, "R": 4.292189236, "exp_thr": 5.0, "exp_bin": false, "source": "KC2023", "note": "CL1- (mv)", "mw": null, "orig_ambiguous": false, "orig_multi_value": true, "og_uid": "Q14204;A0A2R8Y706;A0A7P0T9C4;A0A7P0TA13;A0A2R8Y5T0;A0A7P0T9R4;A0A7P0TAW9;A0A7P0T7V5;A0A7P0T916", "sequence": "MSEPGGGGGEDGSAGLEVSAVQNVADVSVLQKHLRKLVPLLLEDGGEAPAALEAALEEKSALEQMRKFLSDPQVHTVLVERSTLKED…
	{"uid": "A0A7P0TA13", "roi": 633, "R": 1.28734136, "exp_thr": 5.0, "exp_bin": false, "source": "KC2023", "note": "CL1- (mv)", "mw": null, "orig_ambiguous": false, "orig_multi_value": true, "og_uid": "Q14204;A0A2R8Y706;A0A7P0T9C4;A0A7P0TA13;A0A2R8Y5T0;A0A7P0T9R4;A0A7P0TAW9;A0A7P0T7V5;A0A7P0T916;A0A7P0T8N2;A0A7P0TBJ7;A0A7P0TAF3;A0A7P0TB75;A0A7P0T9K2;A0A2R8Y6H2;A0A7P0T9F1;A0A7P0T8W5;A0A2R8YFZ7;A0A7P…
	{"uid": "A0A7P0TA13", "roi": 2639, "R": 0.797693757, "exp_thr": 5.0, "exp_bin": false, "source": "KC2023", "note": "CL1- (mv)", "mw": null, "orig_ambiguous": false, "orig_multi_value": true, "og_uid": "Q14204;A0A2R8Y706;A0A7P0T9C4;A0A7P0TA13;A0A2R8Y5T0;A0A7P0T9R4;A0A7P0TAW9;A0A7P0T7V5;A0A7P0T916;A0A7P0T8N2;A0A7P0TBJ7;A0A7P0TAF3;A0A7P0TB75;A0A7P0T9K2;A0A2R8Y6H2;A0A7P0T9F1;A0A7P0T8W5;A0A2R8YFZ7;A0A…
	{"uid": "A0A7P0TA13", "roi": 867, "R": 0.782937647, "exp_thr": 5.0, "exp_bin": false, "source": "KC2023", "note": "CL1- (mv)", "mw": null, "orig_ambiguous": false, "orig_multi_value": true, "og_uid": "Q14204;A0A2R8Y706;A0A7P0T9C4;A0A7P0TA13;A0A2R8Y5T0;A0A7P0T9R4;A0A7P0TAW9;A0A7P0T7V5;A0A7P0T916;A0A7P0T8N2;A0A7P0TBJ7;A0A7P0TAF3;A0A7P0TB75;A0A7P0T9K2;A0A2R8Y6H2;A0A7P0T9F1;A0A7P0T8W5;A0A2R8YFZ7;A0A7…
	{"uid": "A0A7P0TA13", "roi": 2712, "R": 0.761058513, "exp_thr": 5.0, "exp_bin": false, "source": "KC2023", "note": "CL1- (mv)", "mw": null, "orig_ambiguous": false, "orig_multi_value": true, "og_uid": "Q14204;A0A2R8Y706;A0A7P0T9C4;A0A7P0TA13;A0A2R8Y5T0;A0A7P0T9R4;A0A7P0TAW9;A0A7P0T7V5;A0A7P0T916;A0A7P0T8N2;A0A7P0TBJ7;A0A7P0TAF3;A0A7P0TB75;A0A7P0T9K2;A0A2R8Y6H2;A0A7P0T9F1;A0A7P0T8W5;A0A2R8YFZ7;A0A…
	{"uid": "A0A7P0TA13", "roi": 1999, "R": 0.669931153, "exp_thr": 5.0, "exp_bin": false, "source": "KC2023", "note": "CL1- (mv)", "mw": null, "orig_ambiguous": false, "orig_multi_value": true, "og_uid": "Q14204;A0A2R8Y706;A0A7P0T9C4;A0A7P0TA13;A0A2R8Y5T0;A0A7P0T9R4;A0A7P0TAW9;A0A7P0T7V5;A0A7P0T916;A0A7P0T8N2;A0A7P0TBJ7;A0A7P0TAF3;A0A7P0TB75;A0A7P0T9K2;A0A2R8Y6H2;A0A7P0T9F1;A0A7P0T8W5;A0A2R8YFZ7;A0A…
	{"uid": "A0A7P0T9R4", "roi": 4216, "R": 4.292189236, "exp_thr": 5.0, "exp_bin": false, "source": "KC2023", "note": "CL1- (mv)", "mw": null, "orig_ambiguous": false, "orig_multi_value": true, "og_uid": "Q14204;A0A2R8Y706;A0A7P0T9C4;A0A7P0TA13;A0A2R8Y5T0;A0A7P0T9R4;A0A7P0TAW9;A0A7P0T7V5;A0A7P0T916", "sequence": "MSEPGGGGGEDGSAGLEVSAVQNVADVSVLQKHLRKLVPLLLEDGGEAPAALEAALEEKSALEQMRKFLSDPQVHTVLVERSTLKED…
	{"uid": "A0A7P0T9R4", "roi": 633, "R": 1.28734136, "exp_thr": 5.0, "exp_bin": false, "source": "KC2023", "note": "CL1- (mv)", "mw": null, "orig_ambiguous": false, "orig_multi_value": true, "og_uid": "Q14204;A0A2R8Y706;A0A7P0T9C4;A0A7P0TA13;A0A2R8Y5T0;A0A7P0T9R4;A0A7P0TAW9;A0A7P0T7V5;A0A7P0T916;A0A7P0T8N2;A0A7P0TBJ7;A0A7P0TAF3;A0A7P0TB75;A0A7P0T9K2;A0A2R8Y6H2;A0A7P0T9F1;A0A7P0T8W5;A0A2R8YFZ7;A0A7P…
	{"uid": "A0A7P0T9R4", "roi": 2639, "R": 0.797693757, "exp_thr": 5.0, "exp_bin": false, "source": "KC2023", "note": "CL1- (mv)", "mw": null, "orig_ambiguous": false, "orig_multi_value": true, "og_uid": "Q14204;A0A2R8Y706;A0A7P0T9C4;A0A7P0TA13;A0A2R8Y5T0;A0A7P0T9R4;A0A7P0TAW9;A0A7P0T7V5;A0A7P0T916;A0A7P0T8N2;A0A7P0TBJ7;A0A7P0TAF3;A0A7P0TB75;A0A7P0T9K2;A0A2R8Y6H2;A0A7P0T9F1;A0A7P0T8W5;A0A2R8YFZ7;A0A…
	{"uid": "A0A7P0T9R4", "roi": 867, "R": 0.782937647, "exp_thr": 5.0, "exp_bin": false, "source": "KC2023", "note": "CL1- (mv)", "mw": null, "orig_ambiguous": false, "orig_multi_value": true, "og_uid": "Q14204;A0A2R8Y706;A0A7P0T9C4;A0A7P0TA13;A0A2R8Y5T0;A0A7P0T9R4;A0A7P0TAW9;A0A7P0T7V5;A0A7P0T916;A0A7P0T8N2;A0A7P0TBJ7;A0A7P0TAF3;A0A7P0TB75;A0A7P0T9K2;A0A2R8Y6H2;A0A7P0T9F1;A0A7P0T8W5;A0A2R8YFZ7;A0A7…
	{"uid": "A0A7P0T9R4", "roi": 2712, "R": 0.761058513, "exp_thr": 5.0, "exp_bin": false, "source": "KC2023", "note": "CL1- (mv)", "mw": null, "orig_ambiguous": false, "orig_multi_value": true, "og_uid": "Q14204;A0A2R8Y706;A0A7P0T9C4;A0A7P0TA13;A0A2R8Y5T0;A0A7P0T9R4;A0A7P0TAW9;A0A7P0T7V5;A0A7P0T916;A0A7P0T8N2;A0A7P0TBJ7;A0A7P0TAF3;A0A7P0TB75;A0A7P0T9K2;A0A2R8Y6H2;A0A7P0T9F1;A0A7P0T8W5;A0A2R8YFZ7;A0A…
	{"uid": "A0A7P0T9R4", "roi": 1999, "R": 0.669931153, "exp_thr": 5.0, "exp_bin": false, "source": "KC2023", "note": "CL1- (mv)", "mw": null, "orig_ambiguous": false, "orig_multi_value": true, "og_uid": "Q14204;A0A2R8Y706;A0A7P0T9C4;A0A7P0TA13;A0A2R8Y5T0;A0A7P0T9R4;A0A7P0TAW9;A0A7P0T7V5;A0A7P0T916;A0A7P0T8N2;A0A7P0TBJ7;A0A7P0TAF3;A0A7P0TB75;A0A7P0T9K2;A0A2R8Y6H2;A0A7P0T9F1;A0A7P0T8W5;A0A2R8YFZ7;A0A…
	{"uid": "A0A7P0T7V5", "roi": 4216, "R": 4.292189236, "exp_thr": 5.0, "exp_bin": false, "source": "KC2023", "note": "CL1- (mv)", "mw": null, "orig_ambiguous": false, "orig_multi_value": true, "og_uid": "Q14204;A0A2R8Y706;A0A7P0T9C4;A0A7P0TA13;A0A2R8Y5T0;A0A7P0T9R4;A0A7P0TAW9;A0A7P0T7V5;A0A7P0T916", "sequence": "MSEPGGGGGEDGSAGLEVSAVQNVADVSVLQKHLRKLVPLLLEDGGEAPAALEAALEEKSALEQMRKFLSDPQVHTVLVERSTLKED…
	{"uid": "A0A7P0T7V5", "roi": 633, "R": 1.28734136, "exp_thr": 5.0, "exp_bin": false, "source": "KC2023", "note": "CL1- (mv)", "mw": null, "orig_ambiguous": false, "orig_multi_value": true, "og_uid": "Q14204;A0A2R8Y706;A0A7P0T9C4;A0A7P0TA13;A0A2R8Y5T0;A0A7P0T9R4;A0A7P0TAW9;A0A7P0T7V5;A0A7P0T916;A0A7P0T8N2;A0A7P0TBJ7;A0A7P0TAF3;A0A7P0TB75;A0A7P0T9K2;A0A2R8Y6H2;A0A7P0T9F1;A0A7P0T8W5;A0A2R8YFZ7;A0A7P…
	{"uid": "A0A7P0T7V5", "roi": 2639, "R": 0.797693757, "exp_thr": 5.0, "exp_bin": false, "source": "KC2023", "note": "CL1- (mv)", "mw": null, "orig_ambiguous": false, "orig_multi_value": true, "og_uid": "Q14204;A0A2R8Y706;A0A7P0T9C4;A0A7P0TA13;A0A2R8Y5T0;A0A7P0T9R4;A0A7P0TAW9;A0A7P0T7V5;A0A7P0T916;A0A7P0T8N2;A0A7P0TBJ7;A0A7P0TAF3;A0A7P0TB75;A0A7P0T9K2;A0A2R8Y6H2;A0A7P0T9F1;A0A7P0T8W5;A0A2R8YFZ7;A0A…
	{"uid": "A0A7P0T7V5", "roi": 867, "R": 0.782937647, "exp_thr": 5.0, "exp_bin": false, "source": "KC2023", "note": "CL1- (mv)", "mw": null, "orig_ambiguous": false, "orig_multi_value": true, "og_uid": "Q14204;A0A2R8Y706;A0A7P0T9C4;A0A7P0TA13;A0A2R8Y5T0;A0A7P0T9R4;A0A7P0TAW9;A0A7P0T7V5;A0A7P0T916;A0A7P0T8N2;A0A7P0TBJ7;A0A7P0TAF3;A0A7P0TB75;A0A7P0T9K2;A0A2R8Y6H2;A0A7P0T9F1;A0A7P0T8W5;A0A2R8YFZ7;A0A7…
	{"uid": "A0A7P0T7V5", "roi": 2712, "R": 0.761058513, "exp_thr": 5.0, "exp_bin": false, "source": "KC2023", "note": "CL1- (mv)", "mw": null, "orig_ambiguous": false, "orig_multi_value": true, "og_uid": "Q14204;A0A2R8Y706;A0A7P0T9C4;A0A7P0TA13;A0A2R8Y5T0;A0A7P0T9R4;A0A7P0TAW9;A0A7P0T7V5;A0A7P0T916;A0A7P0T8N2;A0A7P0TBJ7;A0A7P0TAF3;A0A7P0TB75;A0A7P0T9K2;A0A2R8Y6H2;A0A7P0T9F1;A0A7P0T8W5;A0A2R8YFZ7;A0A…
	{"uid": "A0A7P0T7V5", "roi": 1999, "R": 0.669931153, "exp_thr": 5.0, "exp_bin": false, "source": "KC2023", "note": "CL1- (mv)", "mw": null, "orig_ambiguous": false, "orig_multi_value": true, "og_uid": "Q14204;A0A2R8Y706;A0A7P0T9C4;A0A7P0TA13;A0A2R8Y5T0;A0A7P0T9R4;A0A7P0TAW9;A0A7P0T7V5;A0A7P0T916;A0A7P0T8N2;A0A7P0TBJ7;A0A7P0TAF3;A0A7P0TB75;A0A7P0T9K2;A0A2R8Y6H2;A0A7P0T9F1;A0A7P0T8W5;A0A2R8YFZ7;A0A…
	{"uid": "A0A7P0TAW9", "roi": 4216, "R": 4.292189236, "exp_thr": 5.0, "exp_bin": false, "source": "KC2023", "note": "CL1- (mv)", "mw": null, "orig_ambiguous": false, "orig_multi_value": true, "og_uid": "Q14204;A0A2R8Y706;A0A7P0T9C4;A0A7P0TA13;A0A2R8Y5T0;A0A7P0T9R4;A0A7P0TAW9;A0A7P0T7V5;A0A7P0T916", "sequence": "MSEPGGGGGEDGSAGLEVSAVQNVADVSVLQKHLRKLVPLLLEDGGEAPAALEAALEEKSALEQMRKFLSDPQVHTVLVERSTLKED…
	{"uid": "A0A7P0TAW9", "roi": 633, "R": 1.28734136, "exp_thr": 5.0, "exp_bin": false, "source": "KC2023", "note": "CL1- (mv)", "mw": null, "orig_ambiguous": false, "orig_multi_value": true, "og_uid": "Q14204;A0A2R8Y706;A0A7P0T9C4;A0A7P0TA13;A0A2R8Y5T0;A0A7P0T9R4;A0A7P0TAW9;A0A7P0T7V5;A0A7P0T916;A0A7P0T8N2;A0A7P0TBJ7;A0A7P0TAF3;A0A7P0TB75;A0A7P0T9K2;A0A2R8Y6H2;A0A7P0T9F1;A0A7P0T8W5;A0A2R8YFZ7;A0A7P…
	{"uid": "A0A7P0TAW9", "roi": 2639, "R": 0.797693757, "exp_thr": 5.0, "exp_bin": false, "source": "KC2023", "note": "CL1- (mv)", "mw": null, "orig_ambiguous": false, "orig_multi_value": true, "og_uid": "Q14204;A0A2R8Y706;A0A7P0T9C4;A0A7P0TA13;A0A2R8Y5T0;A0A7P0T9R4;A0A7P0TAW9;A0A7P0T7V5;A0A7P0T916;A0A7P0T8N2;A0A7P0TBJ7;A0A7P0TAF3;A0A7P0TB75;A0A7P0T9K2;A0A2R8Y6H2;A0A7P0T9F1;A0A7P0T8W5;A0A2R8YFZ7;A0A…
	{"uid": "A0A7P0TAW9", "roi": 867, "R": 0.782937647, "exp_thr": 5.0, "exp_bin": false, "source": "KC2023", "note": "CL1- (mv)", "mw": null, "orig_ambiguous": false, "orig_multi_value": true, "og_uid": "Q14204;A0A2R8Y706;A0A7P0T9C4;A0A7P0TA13;A0A2R8Y5T0;A0A7P0T9R4;A0A7P0TAW9;A0A7P0T7V5;A0A7P0T916;A0A7P0T8N2;A0A7P0TBJ7;A0A7P0TAF3;A0A7P0TB75;A0A7P0T9K2;A0A2R8Y6H2;A0A7P0T9F1;A0A7P0T8W5;A0A2R8YFZ7;A0A7…
	{"uid": "A0A7P0TAW9", "roi": 2712, "R": 0.761058513, "exp_thr": 5.0, "exp_bin": false, "source": "KC2023", "note": "CL1- (mv)", "mw": null, "orig_ambiguous": false, "orig_multi_value": true, "og_uid": "Q14204;A0A2R8Y706;A0A7P0T9C4;A0A7P0TA13;A0A2R8Y5T0;A0A7P0T9R4;A0A7P0TAW9;A0A7P0T7V5;A0A7P0T916;A0A7P0T8N2;A0A7P0TBJ7;A0A7P0TAF3;A0A7P0TB75;A0A7P0T9K2;A0A2R8Y6H2;A0A7P0T9F1;A0A7P0T8W5;A0A2R8YFZ7;A0A…
	{"uid": "A0A7P0TAW9", "roi": 1999, "R": 0.669931153, "exp_thr": 5.0, "exp_bin": false, "source": "KC2023", "note": "CL1- (mv)", "mw": null, "orig_ambiguous": false, "orig_multi_value": true, "og_uid": "Q14204;A0A2R8Y706;A0A7P0T9C4;A0A7P0TA13;A0A2R8Y5T0;A0A7P0T9R4;A0A7P0TAW9;A0A7P0T7V5;A0A7P0T916;A0A7P0T8N2;A0A7P0TBJ7;A0A7P0TAF3;A0A7P0TB75;A0A7P0T9K2;A0A2R8Y6H2;A0A7P0T9F1;A0A7P0T8W5;A0A2R8YFZ7;A0A…
	{"uid": "A0A7P0T916", "roi": 4216, "R": 4.292189236, "exp_thr": 5.0, "exp_bin": false, "source": "KC2023", "note": "CL1- (mv)", "mw": null, "orig_ambiguous": false, "orig_multi_value": true, "og_uid": "Q14204;A0A2R8Y706;A0A7P0T9C4;A0A7P0TA13;A0A2R8Y5T0;A0A7P0T9R4;A0A7P0TAW9;A0A7P0T7V5;A0A7P0T916", "sequence": "MSEPGGGGGEDGSAGLEVSAVQNVADVSVLQKHLRKLVPLLLEDGGEAPAALEAALEEKSALEQMRKFLSDPQVHTVLVERSTLKED…
	{"uid": "A0A7P0T916", "roi": 633, "R": 1.28734136, "exp_thr": 5.0, "exp_bin": false, "source": "KC2023", "note": "CL1- (mv)", "mw": null, "orig_ambiguous": false, "orig_multi_value": true, "og_uid": "Q14204;A0A2R8Y706;A0A7P0T9C4;A0A7P0TA13;A0A2R8Y5T0;A0A7P0T9R4;A0A7P0TAW9;A0A7P0T7V5;A0A7P0T916;A0A7P0T8N2;A0A7P0TBJ7;A0A7P0TAF3;A0A7P0TB75;A0A7P0T9K2;A0A2R8Y6H2;A0A7P0T9F1;A0A7P0T8W5;A0A2R8YFZ7;A0A7P…
	{"uid": "A0A7P0T916", "roi": 2639, "R": 0.797693757, "exp_thr": 5.0, "exp_bin": false, "source": "KC2023", "note": "CL1- (mv)", "mw": null, "orig_ambiguous": false, "orig_multi_value": true, "og_uid": "Q14204;A0A2R8Y706;A0A7P0T9C4;A0A7P0TA13;A0A2R8Y5T0;A0A7P0T9R4;A0A7P0TAW9;A0A7P0T7V5;A0A7P0T916;A0A7P0T8N2;A0A7P0TBJ7;A0A7P0TAF3;A0A7P0TB75;A0A7P0T9K2;A0A2R8Y6H2;A0A7P0T9F1;A0A7P0T8W5;A0A2R8YFZ7;A0A…
	{"uid": "A0A7P0T916", "roi": 867, "R": 0.782937647, "exp_thr": 5.0, "exp_bin": false, "source": "KC2023", "note": "CL1- (mv)", "mw": null, "orig_ambiguous": false, "orig_multi_value": true, "og_uid": "Q14204;A0A2R8Y706;A0A7P0T9C4;A0A7P0TA13;A0A2R8Y5T0;A0A7P0T9R4;A0A7P0TAW9;A0A7P0T7V5;A0A7P0T916;A0A7P0T8N2;A0A7P0TBJ7;A0A7P0TAF3;A0A7P0TB75;A0A7P0T9K2;A0A2R8Y6H2;A0A7P0T9F1;A0A7P0T8W5;A0A2R8YFZ7;A0A7…
	{"uid": "A0A7P0T916", "roi": 2712, "R": 0.761058513, "exp_thr": 5.0, "exp_bin": false, "source": "KC2023", "note": "CL1- (mv)", "mw": null, "orig_ambiguous": false, "orig_multi_value": true, "og_uid": "Q14204;A0A2R8Y706;A0A7P0T9C4;A0A7P0TA13;A0A2R8Y5T0;A0A7P0T9R4;A0A7P0TAW9;A0A7P0T7V5;A0A7P0T916;A0A7P0T8N2;A0A7P0TBJ7;A0A7P0TAF3;A0A7P0TB75;A0A7P0T9K2;A0A2R8Y6H2;A0A7P0T9F1;A0A7P0T8W5;A0A2R8YFZ7;A0A…
	{"uid": "A0A7P0T916", "roi": 1999, "R": 0.669931153, "exp_thr": 5.0, "exp_bin": false, "source": "KC2023", "note": "CL1- (mv)", "mw": null, "orig_ambiguous": false, "orig_multi_value": true, "og_uid": "Q14204;A0A2R8Y706;A0A7P0T9C4;A0A7P0TA13;A0A2R8Y5T0;A0A7P0T9R4;A0A7P0TAW9;A0A7P0T7V5;A0A7P0T916;A0A7P0T8N2;A0A7P0TBJ7;A0A7P0TAF3;A0A7P0TB75;A0A7P0T9K2;A0A2R8Y6H2;A0A7P0T9F1;A0A7P0T8W5;A0A2R8YFZ7;A0A…
	{"uid": "A0A7I2V3H3", "roi": 234, "R": 3.94807318, "exp_thr": 5.0, "exp_bin": false, "source": "KC2023", "note": "CL1- (mv)", "mw": null, "orig_ambiguous": false, "orig_multi_value": true, "og_uid": "Q5VTE0;P68104;A0A7I2V659;A0A087WVQ9;A0A7I2V5N4;A0A7I2V3H3;A0A087WV01", "sequence": "MGKEKTHINIVVIGHVDSGKSTTTGHLIYKCGGIDKRTIEKFEKEAAEMGKGSFKYAWVLDKLKAERERGITIDISLWKFETSKYYVTIIDAPGHRDFIKNMITGTSQADCAVLI…
	{"uid": "A0A7I2V3H3", "roi": 234, "R": 2.914043993, "exp_thr": 5.0, "exp_bin": false, "source": "KC2023", "note": "CL1- (mv)", "mw": null, "orig_ambiguous": false, "orig_multi_value": true, "og_uid": "Q5VTE0;P68104;A0A7I2V659;A0A087WVQ9;A0A7I2V5N4;A0A7I2V3H3;A0A087WV01", "sequence": "MGKEKTHINIVVIGHVDSGKSTTTGHLIYKCGGIDKRTIEKFEKEAAEMGKGSFKYAWVLDKLKAERERGITIDISLWKFETSKYYVTIIDAPGHRDFIKNMITGTSQADCAVL…
	{"uid": "A0A7I2V3H3", "roi": 31, "R": 1.317330995, "exp_thr": 5.0, "exp_bin": false, "source": "KC2023", "note": "CL1- (mv)", "mw": null, "orig_ambiguous": false, "orig_multi_value": true, "og_uid": "A0A2U3TZH3;Q05639;A0A2R8Y488;A0A2R8Y660;A0A2R8YDN5;A0A6Q8PFK6;Q5VTE0;P68104;A0A7I2V659;A0A087WVQ9;A0A7I2V5N4;A0A7I2V3H3;A0A087WV01;A6PW80;Q5JR01", "sequence": "MGKEKTHINIVVIGHVDSGKSTTTGHLIYKCGGIDKRTI…
	{"uid": "A0A7I2V351", "roi": 223, "R": 3.438743919, "exp_thr": 5.0, "exp_bin": false, "source": "KC2023", "note": "CL1- (mv)", "mw": null, "orig_ambiguous": false, "orig_multi_value": true, "og_uid": "A0A7I2V351;A0A7I2V487;A0A7I2YQE1;P52292;A0A7I2V3Z3", "sequence": "MSTNENANTPAARLHRFKNKGKDSTEMRRRRIEVNVELRKAKKDDQMLKRRNVSSFPDDATSPLQENRNNQGTVNWSVDDIVKGINSSNVENQLQATQAARKLLSREKQPPIDNIIRAGLIPKFVSFLGRTD…
	{"uid": "A0A7I2V351", "roi": 133, "R": 0.902084363, "exp_thr": 5.0, "exp_bin": false, "source": "KC2023", "note": "CL1- (mv)", "mw": null, "orig_ambiguous": false, "orig_multi_value": true, "og_uid": "A0A7I2V351;A0A7I2V487;A0A7I2YQE1;P52292;A0A7I2V3Z3", "sequence": "MSTNENANTPAARLHRFKNKGKDSTEMRRRRIEVNVELRKAKKDDQMLKRRNVSSFPDDATSPLQENRNNQGTVNWSVDDIVKGINSSNVENQLQATQAARKLLSREKQPPIDNIIRAGLIPKFVSFLGRTD…
	{"uid": "A0A087WV01", "roi": 234, "R": 3.94807318, "exp_thr": 5.0, "exp_bin": false, "source": "KC2023", "note": "CL1- (mv)", "mw": null, "orig_ambiguous": false, "orig_multi_value": true, "og_uid": "Q5VTE0;P68104;A0A7I2V659;A0A087WVQ9;A0A7I2V5N4;A0A7I2V3H3;A0A087WV01", "sequence": "MGKEKTHINIVVIGHVDSGKSTTTGHLIYKCGGIDKRTIEKFEKEAAEMGKGSFKYAWVLDKLKAERERGITIDISLWKFETSKYYVTIIDAPGHRDFIKNMITGTSQADCAVLI…
	{"uid": "A0A087WV01", "roi": 234, "R": 2.914043993, "exp_thr": 5.0, "exp_bin": false, "source": "KC2023", "note": "CL1- (mv)", "mw": null, "orig_ambiguous": false, "orig_multi_value": true, "og_uid": "Q5VTE0;P68104;A0A7I2V659;A0A087WVQ9;A0A7I2V5N4;A0A7I2V3H3;A0A087WV01", "sequence": "MGKEKTHINIVVIGHVDSGKSTTTGHLIYKCGGIDKRTIEKFEKEAAEMGKGSFKYAWVLDKLKAERERGITIDISLWKFETSKYYVTIIDAPGHRDFIKNMITGTSQADCAVL…
	{"uid": "A0A087WV01", "roi": 31, "R": 1.317330995, "exp_thr": 5.0, "exp_bin": false, "source": "KC2023", "note": "CL1- (mv)", "mw": null, "orig_ambiguous": false, "orig_multi_value": true, "og_uid": "A0A2U3TZH3;Q05639;A0A2R8Y488;A0A2R8Y660;A0A2R8YDN5;A0A6Q8PFK6;Q5VTE0;P68104;A0A7I2V659;A0A087WVQ9;A0A7I2V5N4;A0A7I2V3H3;A0A087WV01;A6PW80;Q5JR01", "sequence": "MGKEKTHINIVVIGHVDSGKSTTTGHLIYKCGGIDKRTI…
	{"uid": "A0A7I2YQE1", "roi": 223, "R": 3.438743919, "exp_thr": 5.0, "exp_bin": false, "source": "KC2023", "note": "CL1- (mv)", "mw": null, "orig_ambiguous": false, "orig_multi_value": true, "og_uid": "A0A7I2V351;A0A7I2V487;A0A7I2YQE1;P52292;A0A7I2V3Z3", "sequence": "MSTNENANTPAARLHRFKNKGKDSTEMRRRRIEVNVELRKAKKDDQMLKRRNVSSFPDDATSPLQENRNNQGTVNWSVDDIVKGINSSNVENQLQATQAARKLLSREKQPPIDNIIRAGLIPKFVSFLGRTD…
	{"uid": "A0A7I2YQE1", "roi": 133, "R": 0.902084363, "exp_thr": 5.0, "exp_bin": false, "source": "KC2023", "note": "CL1- (mv)", "mw": null, "orig_ambiguous": false, "orig_multi_value": true, "og_uid": "A0A7I2V351;A0A7I2V487;A0A7I2YQE1;P52292;A0A7I2V3Z3", "sequence": "MSTNENANTPAARLHRFKNKGKDSTEMRRRRIEVNVELRKAKKDDQMLKRRNVSSFPDDATSPLQENRNNQGTVNWSVDDIVKGINSSNVENQLQATQAARKLLSREKQPPIDNIIRAGLIPKFVSFLGRTD…
	{"uid": "A0A7I2V487", "roi": 223, "R": 3.438743919, "exp_thr": 5.0, "exp_bin": false, "source": "KC2023", "note": "CL1- (mv)", "mw": null, "orig_ambiguous": false, "orig_multi_value": true, "og_uid": "A0A7I2V351;A0A7I2V487;A0A7I2YQE1;P52292;A0A7I2V3Z3", "sequence": "MSTNENANTPAARLHRFKNKGKDSTEMRRRRIEVNVELRKAKKDDQMLKRRNVSSFPDDATSPLQENRNNQGTVNWSVDDIVKGINSSNVENQLQATQAARKLLSREKQPPIDNIIRAGLIPKFVSFLGRTD…
	{"uid": "A0A7I2V487", "roi": 133, "R": 0.902084363, "exp_thr": 5.0, "exp_bin": false, "source": "KC2023", "note": "CL1- (mv)", "mw": null, "orig_ambiguous": false, "orig_multi_value": true, "og_uid": "A0A7I2V351;A0A7I2V487;A0A7I2YQE1;P52292;A0A7I2V3Z3", "sequence": "MSTNENANTPAARLHRFKNKGKDSTEMRRRRIEVNVELRKAKKDDQMLKRRNVSSFPDDATSPLQENRNNQGTVNWSVDDIVKGINSSNVENQLQATQAARKLLSREKQPPIDNIIRAGLIPKFVSFLGRTD…
	{"uid": "F8W1J0", "roi": 42, "R": 15.30923386, "exp_thr": 5.0, "exp_bin": true, "source": "KC2023", "note": "CL1	(mv)", "mw": null, "orig_ambiguous": false, "orig_multi_value": true, "og_uid": "O95861;A6NF51;F8W1J0;F8VZG4;F8VVW8", "sequence": "MASSNTVLMRLVASAYSIAQKAGMIVRRVIAEGDLGIVEKTCATDLQTKADRLAQMSICSSLARKFPKLTIIGEELVVWVDPLDGTKEYTEGLLDNVTVLIGIAYEGKAIAGVINQPYYNYEAGPDAVLGRTIWGVLGLGAFGFQLKEVPAGKHIITTTRSHSNKLVTDC", "mapped_roi": 42, "window_seq": "EGDLGIVEKTCATDLQTKADR"}
	{"uid": "A0A7P0T9C4", "roi": 4216, "R": 4.292189236, "exp_thr": 5.0, "exp_bin": false, "source": "KC2023", "note": "CL1- (mv)", "mw": null, "orig_ambiguous": false, "orig_multi_value": true, "og_uid": "Q14204;A0A2R8Y706;A0A7P0T9C4;A0A7P0TA13;A0A2R8Y5T0;A0A7P0T9R4;A0A7P0TAW9;A0A7P0T7V5;A0A7P0T916", "sequence": "MSEPGGGGGEDGSAGLEVSAVQNVADVSVLQKHLRKLVPLLLEDGGEAPAALEAALEEKSALEQMRKFLSDPQVHTVLVERSTLKED…
	{"uid": "A0A7P0T9C4", "roi": 633, "R": 1.28734136, "exp_thr": 5.0, "exp_bin": false, "source": "KC2023", "note": "CL1- (mv)", "mw": null, "orig_ambiguous": false, "orig_multi_value": true, "og_uid": "Q14204;A0A2R8Y706;A0A7P0T9C4;A0A7P0TA13;A0A2R8Y5T0;A0A7P0T9R4;A0A7P0TAW9;A0A7P0T7V5;A0A7P0T916;A0A7P0T8N2;A0A7P0TBJ7;A0A7P0TAF3;A0A7P0TB75;A0A7P0T9K2;A0A2R8Y6H2;A0A7P0T9F1;A0A7P0T8W5;A0A2R8YFZ7;A0A7P…
	{"uid": "A0A7P0T9C4", "roi": 2639, "R": 0.797693757, "exp_thr": 5.0, "exp_bin": false, "source": "KC2023", "note": "CL1- (mv)", "mw": null, "orig_ambiguous": false, "orig_multi_value": true, "og_uid": "Q14204;A0A2R8Y706;A0A7P0T9C4;A0A7P0TA13;A0A2R8Y5T0;A0A7P0T9R4;A0A7P0TAW9;A0A7P0T7V5;A0A7P0T916;A0A7P0T8N2;A0A7P0TBJ7;A0A7P0TAF3;A0A7P0TB75;A0A7P0T9K2;A0A2R8Y6H2;A0A7P0T9F1;A0A7P0T8W5;A0A2R8YFZ7;A0A…
	{"uid": "A0A7P0T9C4", "roi": 867, "R": 0.782937647, "exp_thr": 5.0, "exp_bin": false, "source": "KC2023", "note": "CL1- (mv)", "mw": null, "orig_ambiguous": false, "orig_multi_value": true, "og_uid": "Q14204;A0A2R8Y706;A0A7P0T9C4;A0A7P0TA13;A0A2R8Y5T0;A0A7P0T9R4;A0A7P0TAW9;A0A7P0T7V5;A0A7P0T916;A0A7P0T8N2;A0A7P0TBJ7;A0A7P0TAF3;A0A7P0TB75;A0A7P0T9K2;A0A2R8Y6H2;A0A7P0T9F1;A0A7P0T8W5;A0A2R8YFZ7;A0A7…
	{"uid": "A0A7P0T9C4", "roi": 2712, "R": 0.761058513, "exp_thr": 5.0, "exp_bin": false, "source": "KC2023", "note": "CL1- (mv)", "mw": null, "orig_ambiguous": false, "orig_multi_value": true, "og_uid": "Q14204;A0A2R8Y706;A0A7P0T9C4;A0A7P0TA13;A0A2R8Y5T0;A0A7P0T9R4;A0A7P0TAW9;A0A7P0T7V5;A0A7P0T916;A0A7P0T8N2;A0A7P0TBJ7;A0A7P0TAF3;A0A7P0TB75;A0A7P0T9K2;A0A2R8Y6H2;A0A7P0T9F1;A0A7P0T8W5;A0A2R8YFZ7;A0A…
	{"uid": "A0A7P0T9C4", "roi": 1999, "R": 0.669931153, "exp_thr": 5.0, "exp_bin": false, "source": "KC2023", "note": "CL1- (mv)", "mw": null, "orig_ambiguous": false, "orig_multi_value": true, "og_uid": "Q14204;A0A2R8Y706;A0A7P0T9C4;A0A7P0TA13;A0A2R8Y5T0;A0A7P0T9R4;A0A7P0TAW9;A0A7P0T7V5;A0A7P0T916;A0A7P0T8N2;A0A7P0TBJ7;A0A7P0TAF3;A0A7P0TB75;A0A7P0T9K2;A0A2R8Y6H2;A0A7P0T9F1;A0A7P0T8W5;A0A2R8YFZ7;A0A…
	{"uid": "E7EX29", "roi": 25, "R": 3.670809923, "exp_thr": 5.0, "exp_bin": false, "source": "KC2023", "note": "CL1- (mv)", "mw": null, "orig_ambiguous": false, "orig_multi_value": true, "og_uid": "P63104;E7EX29;E7ESK7;E9PD24;E7EVZ2;E5RIR4;E5RGE1", "sequence": "MDKNELVQKAKLAEQAERYDDMAACMKSVTEQGAELSNEERNLLSVAYKNVVGARRSSWRVVSSIEQKTEGAEKKQQMAREYREKIETELRDICNDVLSLLEKFLIPNASQAESKVFYLKMKGDYYRYLAEVAAGDDKK…
	{"uid": "F6RFD5", "roi": 23, "R": 3.712782765, "exp_thr": 5.0, "exp_bin": false, "source": "KC2023", "note": "CL1- (mv)", "mw": null, "orig_ambiguous": false, "orig_multi_value": true, "og_uid": "P60981;F6RFD5", "sequence": "MASGVQVADEVCRIFYDMKVRKCSTPEEIKKRKKAVIFCLSADKKCIIVEEGKEILVGDVGVTITDPFKHFVGMLPEKDCRYALYDASFETKESRKEELMFFLWAPELAPLKSKMIYASSKDAIKKKFQGKCTHS", "mapped_roi": 23, "window_seq": "RIF…
	{"uid": "F6RFD5", "roi": 46, "R": 1.074867253, "exp_thr": 5.0, "exp_bin": false, "source": "KC2023", "note": "CL1- (mv)", "mw": null, "orig_ambiguous": false, "orig_multi_value": true, "og_uid": "P60981;F6RFD5", "sequence": "MASGVQVADEVCRIFYDMKVRKCSTPEEIKKRKKAVIFCLSADKKCIIVEEGKEILVGDVGVTITDPFKHFVGMLPEKDCRYALYDASFETKESRKEELMFFLWAPELAPLKSKMIYASSKDAIKKKFQGKCTHS", "mapped_roi": 46, "window_seq": "VIF…
	{"uid": "F6RFD5", "roi": 23, "R": 1.033094995, "exp_thr": 5.0, "exp_bin": false, "source": "KC2023", "note": "CL1- (mv)", "mw": null, "orig_ambiguous": false, "orig_multi_value": true, "og_uid": "P60981;F6RFD5", "sequence": "MASGVQVADEVCRIFYDMKVRKCSTPEEIKKRKKAVIFCLSADKKCIIVEEGKEILVGDVGVTITDPFKHFVGMLPEKDCRYALYDASFETKESRKEELMFFLWAPELAPLKSKMIYASSKDAIKKKFQGKCTHS", "mapped_roi": 23, "window_seq": "RIF…
	{"uid": "F6RFD5", "roi": 23, "R": 0.913842826, "exp_thr": 5.0, "exp_bin": false, "source": "KC2023", "note": "CL1- (mv)", "mw": null, "orig_ambiguous": false, "orig_multi_value": true, "og_uid": "P60981;F6RFD5", "sequence": "MASGVQVADEVCRIFYDMKVRKCSTPEEIKKRKKAVIFCLSADKKCIIVEEGKEILVGDVGVTITDPFKHFVGMLPEKDCRYALYDASFETKESRKEELMFFLWAPELAPLKSKMIYASSKDAIKKKFQGKCTHS", "mapped_roi": 23, "window_seq": "RIF…
	{"uid": "F6RFD5", "roi": 12, "R": 0.740922082, "exp_thr": 5.0, "exp_bin": false, "source": "KC2023", "note": "CL1- (mv)", "mw": null, "orig_ambiguous": false, "orig_multi_value": true, "og_uid": "P60981;F6RFD5", "sequence": "MASGVQVADEVCRIFYDMKVRKCSTPEEIKKRKKAVIFCLSADKKCIIVEEGKEILVGDVGVTITDPFKHFVGMLPEKDCRYALYDASFETKESRKEELMFFLWAPELAPLKSKMIYASSKDAIKKKFQGKCTHS", "mapped_roi": 12, "window_seq": "ASG…
	{"uid": "F6RFD5", "roi": 23, "R": 0.0, "exp_thr": 5.0, "exp_bin": false, "source": "KC2023", "note": "CL1- (mv)", "mw": null, "orig_ambiguous": false, "orig_multi_value": true, "og_uid": "P60981;F6RFD5", "sequence": "MASGVQVADEVCRIFYDMKVRKCSTPEEIKKRKKAVIFCLSADKKCIIVEEGKEILVGDVGVTITDPFKHFVGMLPEKDCRYALYDASFETKESRKEELMFFLWAPELAPLKSKMIYASSKDAIKKKFQGKCTHS", "mapped_roi": 23, "window_seq": "RIFYDMKVRKC…
	{"uid": "A0A7P0T9C4", "roi": 4216, "R": 4.292189236, "exp_thr": 5.0, "exp_bin": false, "source": "KC2023", "note": "CL1- (mv)", "mw": null, "orig_ambiguous": false, "orig_multi_value": true, "og_uid": "Q14204;A0A2R8Y706;A0A7P0T9C4;A0A7P0TA13;A0A2R8Y5T0;A0A7P0T9R4;A0A7P0TAW9;A0A7P0T7V5;A0A7P0T916", "sequence": "MSEPGGGGGEDGSAGLEVSAVQNVADVSVLQKHLRKLVPLLLEDGGEAPAALEAALEEKSALEQMRKFLSDPQVHTVLVERSTLKED…
	{"uid": "A0A7P0T9C4", "roi": 633, "R": 1.28734136, "exp_thr": 5.0, "exp_bin": false, "source": "KC2023", "note": "CL1- (mv)", "mw": null, "orig_ambiguous": false, "orig_multi_value": true, "og_uid": "Q14204;A0A2R8Y706;A0A7P0T9C4;A0A7P0TA13;A0A2R8Y5T0;A0A7P0T9R4;A0A7P0TAW9;A0A7P0T7V5;A0A7P0T916;A0A7P0T8N2;A0A7P0TBJ7;A0A7P0TAF3;A0A7P0TB75;A0A7P0T9K2;A0A2R8Y6H2;A0A7P0T9F1;A0A7P0T8W5;A0A2R8YFZ7;A0A7P…
	{"uid": "A0A7P0T9C4", "roi": 2639, "R": 0.797693757, "exp_thr": 5.0, "exp_bin": false, "source": "KC2023", "note": "CL1- (mv)", "mw": null, "orig_ambiguous": false, "orig_multi_value": true, "og_uid": "Q14204;A0A2R8Y706;A0A7P0T9C4;A0A7P0TA13;A0A2R8Y5T0;A0A7P0T9R4;A0A7P0TAW9;A0A7P0T7V5;A0A7P0T916;A0A7P0T8N2;A0A7P0TBJ7;A0A7P0TAF3;A0A7P0TB75;A0A7P0T9K2;A0A2R8Y6H2;A0A7P0T9F1;A0A7P0T8W5;A0A2R8YFZ7;A0A…
	{"uid": "A0A7P0T9C4", "roi": 867, "R": 0.782937647, "exp_thr": 5.0, "exp_bin": false, "source": "KC2023", "note": "CL1- (mv)", "mw": null, "orig_ambiguous": false, "orig_multi_value": true, "og_uid": "Q14204;A0A2R8Y706;A0A7P0T9C4;A0A7P0TA13;A0A2R8Y5T0;A0A7P0T9R4;A0A7P0TAW9;A0A7P0T7V5;A0A7P0T916;A0A7P0T8N2;A0A7P0TBJ7;A0A7P0TAF3;A0A7P0TB75;A0A7P0T9K2;A0A2R8Y6H2;A0A7P0T9F1;A0A7P0T8W5;A0A2R8YFZ7;A0A7…
	{"uid": "A0A7P0T9C4", "roi": 2712, "R": 0.761058513, "exp_thr": 5.0, "exp_bin": false, "source": "KC2023", "note": "CL1- (mv)", "mw": null, "orig_ambiguous": false, "orig_multi_value": true, "og_uid": "Q14204;A0A2R8Y706;A0A7P0T9C4;A0A7P0TA13;A0A2R8Y5T0;A0A7P0T9R4;A0A7P0TAW9;A0A7P0T7V5;A0A7P0T916;A0A7P0T8N2;A0A7P0TBJ7;A0A7P0TAF3;A0A7P0TB75;A0A7P0T9K2;A0A2R8Y6H2;A0A7P0T9F1;A0A7P0T8W5;A0A2R8YFZ7;A0A…
	{"uid": "A0A7P0T9C4", "roi": 1999, "R": 0.669931153, "exp_thr": 5.0, "exp_bin": false, "source": "KC2023", "note": "CL1- (mv)", "mw": null, "orig_ambiguous": false, "orig_multi_value": true, "og_uid": "Q14204;A0A2R8Y706;A0A7P0T9C4;A0A7P0TA13;A0A2R8Y5T0;A0A7P0T9R4;A0A7P0TAW9;A0A7P0T7V5;A0A7P0T916;A0A7P0T8N2;A0A7P0TBJ7;A0A7P0TAF3;A0A7P0TB75;A0A7P0T9K2;A0A2R8Y6H2;A0A7P0T9F1;A0A7P0T8W5;A0A2R8YFZ7;A0A…
	{"uid": "E7EX29", "roi": 25, "R": 3.670809923, "exp_thr": 5.0, "exp_bin": false, "source": "KC2023", "note": "CL1- (mv)", "mw": null, "orig_ambiguous": false, "orig_multi_value": true, "og_uid": "P63104;E7EX29;E7ESK7;E9PD24;E7EVZ2;E5RIR4;E5RGE1", "sequence": "MDKNELVQKAKLAEQAERYDDMAACMKSVTEQGAELSNEERNLLSVAYKNVVGARRSSWRVVSSIEQKTEGAEKKQQMAREYREKIETELRDICNDVLSLLEKFLIPNASQAESKVFYLKMKGDYYRYLAEVAAGDDKK…
	{"uid": "E7EX29", "roi": 25, "R": 3.670809923, "exp_thr": 5.0, "exp_bin": false, "source": "KC2023", "note": "CL1- (mv)", "mw": null, "orig_ambiguous": false, "orig_multi_value": true, "og_uid": "P63104;E7EX29;E7ESK7;E9PD24;E7EVZ2;E5RIR4;E5RGE1", "sequence": "MDKNELVQKAKLAEQAERYDDMAACMKSVTEQGAELSNEERNLLSVAYKNVVGARRSSWRVVSSIEQKTEGAEKKQQMAREYREKIETELRDICNDVLSLLEKFLIPNASQAESKVFYLKMKGDYYRYLAEVAAGDDKK…
	{"uid": "E7EX29", "roi": 25, "R": 3.670809923, "exp_thr": 5.0, "exp_bin": false, "source": "KC2023", "note": "CL1- (mv)", "mw": null, "orig_ambiguous": false, "orig_multi_value": true, "og_uid": "P63104;E7EX29;E7ESK7;E9PD24;E7EVZ2;E5RIR4;E5RGE1", "sequence": "MDKNELVQKAKLAEQAERYDDMAACMKSVTEQGAELSNEERNLLSVAYKNVVGARRSSWRVVSSIEQKTEGAEKKQQMAREYREKIETELRDICNDVLSLLEKFLIPNASQAESKVFYLKMKGDYYRYLAEVAAGDDKK…
	{"uid": "E7EX29", "roi": 25, "R": 3.670809923, "exp_thr": 5.0, "exp_bin": false, "source": "KC2023", "note": "CL1- (mv)", "mw": null, "orig_ambiguous": false, "orig_multi_value": true, "og_uid": "P63104;E7EX29;E7ESK7;E9PD24;E7EVZ2;E5RIR4;E5RGE1", "sequence": "MDKNELVQKAKLAEQAERYDDMAACMKSVTEQGAELSNEERNLLSVAYKNVVGARRSSWRVVSSIEQKTEGAEKKQQMAREYREKIETELRDICNDVLSLLEKFLIPNASQAESKVFYLKMKGDYYRYLAEVAAGDDKK…
	{"uid": "E7EX29", "roi": 25, "R": 3.670809923, "exp_thr": 5.0, "exp_bin": false, "source": "KC2023", "note": "CL1- (mv)", "mw": null, "orig_ambiguous": false, "orig_multi_value": true, "og_uid": "P63104;E7EX29;E7ESK7;E9PD24;E7EVZ2;E5RIR4;E5RGE1", "sequence": "MDKNELVQKAKLAEQAERYDDMAACMKSVTEQGAELSNEERNLLSVAYKNVVGARRSSWRVVSSIEQKTEGAEKKQQMAREYREKIETELRDICNDVLSLLEKFLIPNASQAESKVFYLKMKGDYYRYLAEVAAGDDKK…
	{"uid": "B1ANR0", "roi": 132, "R": 3.353554063, "exp_thr": 5.0, "exp_bin": false, "source": "KC2023", "note": "CL1- (mv)", "mw": null, "orig_ambiguous": false, "orig_multi_value": true, "og_uid": "P11940;A0A7I2YQ88;H0YAR2;E7EQV3;A0A7I2V649;A0A7I2V4N4;A0A7I2YQE4;A0A7I2YQ90;E5RGH3;A0A7I2V4L7;A0A7I2V5W9;H0YEQ8;A0A7I2V598;H0Y5F5;Q13310;B1ANR0", "sequence": "MNAAASSYPMASLYVGDLHSDVTEAMLYEKFSPAGPVLSIRVC…
	{"uid": "B1ANR0", "roi": 339, "R": 0.918362585, "exp_thr": 5.0, "exp_bin": false, "source": "KC2023", "note": "CL1- (mv)", "mw": null, "orig_ambiguous": false, "orig_multi_value": true, "og_uid": "P11940;A0A7I2YQ88;H0YAR2;E7EQV3;A0A7I2V649;A0A7I2V4N4;A0A7I2YQE4;E7ERJ7;A0A7I2YQ90;A0A087WTT1;Q9H361;H0YB86;Q4VXU2;A0A6Q8JFT6;A0A6I8PLA1;A0A6I8PS38;A0A7I2V4L7;A0A7I2V5W9;H0YEU6;A0A7I2V4V6;A0A7I2V598;H0Y…
	{"uid": "E9PPT0", "roi": 182, "R": 3.471825515, "exp_thr": 5.0, "exp_bin": false, "source": "KC2023", "note": "CL1- (mv)", "mw": null, "orig_ambiguous": false, "orig_multi_value": true, "og_uid": "P15880;H0YEN5;E9PMM9;I3L404;E9PPT0;E9PM36", "sequence": "MADDAGAAGGPGGPGGPGMGNRGGFRGGFGSGIRGRGRGRGRGRGRGRGARGGKAEDKEWMPVTKLGRLVKDMKIKSLEEIYLFSLPIKESEIIDFFLGASLKDEVLKIMPVQKQTRAGQRTRFKAFVAIGDYNGHVGLGVKCSK…
	{"uid": "A0A7I2V5N4", "roi": 234, "R": 3.94807318, "exp_thr": 5.0, "exp_bin": false, "source": "KC2023", "note": "CL1- (mv)", "mw": null, "orig_ambiguous": false, "orig_multi_value": true, "og_uid": "Q5VTE0;P68104;A0A7I2V659;A0A087WVQ9;A0A7I2V5N4;A0A7I2V3H3;A0A087WV01", "sequence": "MGKEKTHINIVVIGHVDSGKSTTTGHLIYKCGGIDKRTIEKFEKEAAEMGKGSFKYAWVLDKLKAERERGITIDISLWKFETSKYYVTIIDAPGHRDFIKNMITGTSQADCAVLI…
	{"uid": "A0A7I2V5N4", "roi": 234, "R": 2.914043993, "exp_thr": 5.0, "exp_bin": false, "source": "KC2023", "note": "CL1- (mv)", "mw": null, "orig_ambiguous": false, "orig_multi_value": true, "og_uid": "Q5VTE0;P68104;A0A7I2V659;A0A087WVQ9;A0A7I2V5N4;A0A7I2V3H3;A0A087WV01", "sequence": "MGKEKTHINIVVIGHVDSGKSTTTGHLIYKCGGIDKRTIEKFEKEAAEMGKGSFKYAWVLDKLKAERERGITIDISLWKFETSKYYVTIIDAPGHRDFIKNMITGTSQADCAVL…
	{"uid": "A0A7I2V5N4", "roi": 31, "R": 1.317330995, "exp_thr": 5.0, "exp_bin": false, "source": "KC2023", "note": "CL1- (mv)", "mw": null, "orig_ambiguous": false, "orig_multi_value": true, "og_uid": "A0A2U3TZH3;Q05639;A0A2R8Y488;A0A2R8Y660;A0A2R8YDN5;A0A6Q8PFK6;Q5VTE0;P68104;A0A7I2V659;A0A087WVQ9;A0A7I2V5N4;A0A7I2V3H3;A0A087WV01;A6PW80;Q5JR01", "sequence": "MGKEKTHINIVVIGHVDSGKSTTTGHLIYKCGGIDKRTI…
	{"uid": "I3L2J8", "roi": 218, "R": 3.165927396, "exp_thr": 5.0, "exp_bin": false, "source": "KC2023", "note": "CL1- (mv)", "mw": null, "orig_ambiguous": false, "orig_multi_value": true, "og_uid": "I3L2J8;Q9UPN4", "sequence": "MKGTRAIGSVPERSPAGVDLSLTGLPPPVSRRPGSAATTKPIVRSVSVVTGSEQKRKVLEATGPGGSQAINNLRRSNSTTQVSQPRSGSPRPTEPTDFLMLFEGSPSGKKRPASLSTAPSEKGATWNVLDDQPRGFTLPSNARSSSALDSPAGPRRKECTVALAPNFTANNRS…
	{"uid": "F8W1J0", "roi": 42, "R": 15.30923386, "exp_thr": 5.0, "exp_bin": true, "source": "KC2023", "note": "CL1	(mv)", "mw": null, "orig_ambiguous": false, "orig_multi_value": true, "og_uid": "O95861;A6NF51;F8W1J0;F8VZG4;F8VVW8", "sequence": "MASSNTVLMRLVASAYSIAQKAGMIVRRVIAEGDLGIVEKTCATDLQTKADRLAQMSICSSLARKFPKLTIIGEELVVWVDPLDGTKEYTEGLLDNVTVLIGIAYEGKAIAGVINQPYYNYEAGPDAVLGRTIWGVLGLGAFGFQLKEVPAGKHIITTTRSHSNKLVTDC", "mapped_roi": 42, "window_seq": "EGDLGIVEKTCATDLQTKADR"}
	{"uid": "A0A7I2V3Z3", "roi": 223, "R": 3.438743919, "exp_thr": 5.0, "exp_bin": false, "source": "KC2023", "note": "CL1- (mv)", "mw": null, "orig_ambiguous": false, "orig_multi_value": true, "og_uid": "A0A7I2V351;A0A7I2V487;A0A7I2YQE1;P52292;A0A7I2V3Z3", "sequence": "MSTNENANTPAARLHRFKNKGKDSTEMRRRRIEVNVELRKAKKDDQMLKRRNVSSFPDDATSPLQENRNNQGTVNWSVDDIVKGINSSNVENQLQATQAARKLLSREKQPPIDNIIRAGLIPKFVSFLGRTD…
	{"uid": "A0A7I2V3Z3", "roi": 133, "R": 0.902084363, "exp_thr": 5.0, "exp_bin": false, "source": "KC2023", "note": "CL1- (mv)", "mw": null, "orig_ambiguous": false, "orig_multi_value": true, "og_uid": "A0A7I2V351;A0A7I2V487;A0A7I2YQE1;P52292;A0A7I2V3Z3", "sequence": "MSTNENANTPAARLHRFKNKGKDSTEMRRRRIEVNVELRKAKKDDQMLKRRNVSSFPDDATSPLQENRNNQGTVNWSVDDIVKGINSSNVENQLQATQAARKLLSREKQPPIDNIIRAGLIPKFVSFLGRTD…
	{"uid": "H0YAR2", "roi": 132, "R": 3.353554063, "exp_thr": 5.0, "exp_bin": false, "source": "KC2023", "note": "CL1- (mv)", "mw": null, "orig_ambiguous": false, "orig_multi_value": true, "og_uid": "P11940;A0A7I2YQ88;H0YAR2;E7EQV3;A0A7I2V649;A0A7I2V4N4;A0A7I2YQE4;A0A7I2YQ90;E5RGH3;A0A7I2V4L7;A0A7I2V5W9;H0YEQ8;A0A7I2V598;H0Y5F5;Q13310;B1ANR0", "sequence": "MNPSAPSYPMASLYVGDLHPDVTEAMLYEKFSPAGPILSIRVC…
	{"uid": "H0YAR2", "roi": 339, "R": 0.918362585, "exp_thr": 5.0, "exp_bin": false, "source": "KC2023", "note": "CL1- (mv)", "mw": null, "orig_ambiguous": false, "orig_multi_value": true, "og_uid": "P11940;A0A7I2YQ88;H0YAR2;E7EQV3;A0A7I2V649;A0A7I2V4N4;A0A7I2YQE4;E7ERJ7;A0A7I2YQ90;A0A087WTT1;Q9H361;H0YB86;Q4VXU2;A0A6Q8JFT6;A0A6I8PLA1;A0A6I8PS38;A0A7I2V4L7;A0A7I2V5W9;H0YEU6;A0A7I2V4V6;A0A7I2V598;H0Y…
	{"uid": "A0A087WVQ6", "roi": 740, "R": 3.058968375, "exp_thr": 5.0, "exp_bin": false, "source": "KC2023", "note": "CL1- (mv)", "mw": null, "orig_ambiguous": false, "orig_multi_value": true, "og_uid": "A0A087WVQ6;Q00610;P53675;A0A087WX41", "sequence": "MAQILPIRFQEHLQLQNLGINPANIGFSTLTMESDKFICIREKVGEQAQVVIIDMNDPSNPIRRPISADSAIMNPASKVIALKGIKESGKTLQIFNIEMKSKMKAHTMTDDVTFWKWISLNTVALVTDNAVYHWSMEGESQPVKMFD…
	{"uid": "A0A087WVQ6", "roi": 1106, "R": 1.866264748, "exp_thr": 5.0, "exp_bin": false, "source": "KC2023", "note": "CL1- (mv)", "mw": null, "orig_ambiguous": false, "orig_multi_value": true, "og_uid": "A0A087WVQ6;Q00610", "sequence": "MAQILPIRFQEHLQLQNLGINPANIGFSTLTMESDKFICIREKVGEQAQVVIIDMNDPSNPIRRPISADSAIMNPASKVIALKGIKESGKTLQIFNIEMKSKMKAHTMTDDVTFWKWISLNTVALVTDNAVYHWSMEGESQPVKMFDRHSSLAGCQIINYRTDA…
	{"uid": "A0A087WVQ6", "roi": 757, "R": 1.447459105, "exp_thr": 5.0, "exp_bin": false, "source": "KC2023", "note": "CL1- (mv)", "mw": null, "orig_ambiguous": false, "orig_multi_value": true, "og_uid": "A0A087WVQ6;Q00610", "sequence": "MAQILPIRFQEHLQLQNLGINPANIGFSTLTMESDKFICIREKVGEQAQVVIIDMNDPSNPIRRPISADSAIMNPASKVIALKGIKESGKTLQIFNIEMKSKMKAHTMTDDVTFWKWISLNTVALVTDNAVYHWSMEGESQPVKMFDRHSSLAGCQIINYRTDAK…
	{"uid": "A0A087WVQ6", "roi": 1532, "R": 0.983431261, "exp_thr": 5.0, "exp_bin": false, "source": "KC2023", "note": "CL1- (mv)", "mw": null, "orig_ambiguous": false, "orig_multi_value": true, "og_uid": "A0A087WVQ6;Q00610;J3KS13;K7EJJ5;J3KRF5", "sequence": "MAQILPIRFQEHLQLQNLGINPANIGFSTLTMESDKFICIREKVGEQAQVVIIDMNDPSNPIRRPISADSAIMNPASKVIALKGIKESGKTLQIFNIEMKSKMKAHTMTDDVTFWKWISLNTVALVTDNAVYHWSMEGESQPV…
	{"uid": "A0A087WVQ6", "roi": 874, "R": 0.884796508, "exp_thr": 5.0, "exp_bin": false, "source": "KC2023", "note": "CL1- (mv)", "mw": null, "orig_ambiguous": false, "orig_multi_value": true, "og_uid": "A0A087WVQ6;Q00610", "sequence": "MAQILPIRFQEHLQLQNLGINPANIGFSTLTMESDKFICIREKVGEQAQVVIIDMNDPSNPIRRPISADSAIMNPASKVIALKGIKESGKTLQIFNIEMKSKMKAHTMTDDVTFWKWISLNTVALVTDNAVYHWSMEGESQPVKMFDRHSSLAGCQIINYRTDAK…
	{"uid": "A0A087WVQ6", "roi": 922, "R": 0.859984107, "exp_thr": 5.0, "exp_bin": false, "source": "KC2023", "note": "CL1- (mv)", "mw": null, "orig_ambiguous": false, "orig_multi_value": true, "og_uid": "A0A087WVQ6;Q00610;P53675;A0A087WX41", "sequence": "MAQILPIRFQEHLQLQNLGINPANIGFSTLTMESDKFICIREKVGEQAQVVIIDMNDPSNPIRRPISADSAIMNPASKVIALKGIKESGKTLQIFNIEMKSKMKAHTMTDDVTFWKWISLNTVALVTDNAVYHWSMEGESQPVKMFD…
	{"uid": "A0A087WVQ6", "roi": 922, "R": 0.0, "exp_thr": 5.0, "exp_bin": false, "source": "KC2023", "note": "CL1- (mv)", "mw": null, "orig_ambiguous": false, "orig_multi_value": true, "og_uid": "A0A087WVQ6;Q00610;P53675;A0A087WX41", "sequence": "MAQILPIRFQEHLQLQNLGINPANIGFSTLTMESDKFICIREKVGEQAQVVIIDMNDPSNPIRRPISADSAIMNPASKVIALKGIKESGKTLQIFNIEMKSKMKAHTMTDDVTFWKWISLNTVALVTDNAVYHWSMEGESQPVKMFDRHSSLAGC…
	{"uid": "A0A087WVQ6", "roi": 495, "R": 0.0, "exp_thr": 5.0, "exp_bin": false, "source": "KC2023", "note": "CL1- (mv)", "mw": null, "orig_ambiguous": false, "orig_multi_value": true, "og_uid": "A0A087WVQ6;Q00610", "sequence": "MAQILPIRFQEHLQLQNLGINPANIGFSTLTMESDKFICIREKVGEQAQVVIIDMNDPSNPIRRPISADSAIMNPASKVIALKGIKESGKTLQIFNIEMKSKMKAHTMTDDVTFWKWISLNTVALVTDNAVYHWSMEGESQPVKMFDRHSSLAGCQIINYRTDAKQKWLLLTG…
	{"uid": "A0A075B6F9", "roi": 8, "R": 50.0, "exp_thr": 5.0, "exp_bin": true, "source": "KC2023", "note": "CL1	(mv)", "mw": null, "orig_ambiguous": false, "orig_multi_value": true, "og_uid": "M0R3B2;Q9Y314;A0A075B6F9;M0R1T7;M0QX85;M0R1K2", "sequence": "MTRHGKNCTAGAVYTYHEKKKDTAASGYGTQNIRLSRDAVKDFDCCCLSLQPCHDPVVTPDGYLYEREAILEYILHQKKEIARQMKAYEKQRGTRREEQKELQRAASQDHVRGFLEKESAIVSRPLNPFTAKALSGTSPGDSDDVQPGPSVGPPSKDKDKVLPSFWIPSLTPEAKATKLEKPSRTVTCPMSGKPLRMSDLTPVHFTPLDSSVDRVGLITRSERYVCAVTRDSLSNATPCAVLRPSGAVVTLECVEKL…
	{"uid": "A6QRI9", "roi": 49, "R": 2.986096388, "exp_thr": 5.0, "exp_bin": false, "source": "KC2023", "note": "CL1- (mv)", "mw": null, "orig_ambiguous": false, "orig_multi_value": true, "og_uid": "X1WI28;P27635;B8A6G2;A6QRI9", "sequence": "MGRRPARCYRYCKNKPYPKSRFCRGVPDAKIRIFDLGRKKAKVDEFPLCGHMVSDEYEQLSSEALEAARICANKYMVKSCGKDGFHIRVRLHPFHVIRINKMLSCAGADRSTSQRSGASPSSMLMNLKTWWLKSGSSQMAVGSSTSPVVALWTSGGPCTH…
	{"uid": "A6QRI9", "roi": 105, "R": 0.991264798, "exp_thr": 5.0, "exp_bin": false, "source": "KC2023", "note": "CL1- (mv)", "mw": null, "orig_ambiguous": false, "orig_multi_value": true, "og_uid": "F8W7C6;H7C123;H7C2C5;X1WI28;P27635;Q96L21;B8A6G2;A6QRI9", "sequence": "MGRRPARCYRYCKNKPYPKSRFCRGVPDAKIRIFDLGRKKAKVDEFPLCGHMVSDEYEQLSSEALEAARICANKYMVKSCGKDGFHIRVRLHPFHVIRINKMLSCAGADRSTSQRSGASPSSMLMNLKTWW…
	{"uid": "D6REE7", "roi": 428, "R": 2.848956849, "exp_thr": 5.0, "exp_bin": false, "source": "KC2023", "note": "CL1- (mv)", "mw": null, "orig_ambiguous": false, "orig_multi_value": true, "og_uid": "O75116;D6REE7;E9PF63", "sequence": "MSRPPPTGKMPGAPETAPGDGAGASRQRKLEALIRDPRSPINVESLLDGLNSLVLDLDFPALRKNKNIDNFLNRYEKIVKKIRGLQMKAEDYDVVKVIGRGAFGEVQLVRHKASQKVYAMKLLSKFEMIKRSDSAFFWEERDIMAFANSPWVVQLFYAFQDDRYLY…
	{"uid": "E7EVS6", "roi": 217, "R": 3.835235415, "exp_thr": 5.0, "exp_bin": false, "source": "KC2023", "note": "CL1- (mv)", "mw": null, "orig_ambiguous": false, "orig_multi_value": true, "og_uid": "P60709;A0A6Q8PFE4;E7EVS6;A0A2R8Y793;P63261;I3L4N8;Q6S8J3;A0A2R8YEA7", "sequence": "MDDDIAALVVDNGSGMCKAGFAGDDAPRAVFPSIVGRPRHQGVMVGMGQKDSYVGDEAQSKRGILTLKYPIEHGIVTNWDDMEKIWHHTFYNELRVAPEEHPVLLTEAPLNPKANREKM…
	{"uid": "E7EVS6", "roi": 285, "R": 1.408085153, "exp_thr": 5.0, "exp_bin": false, "source": "KC2023", "note": "CL1- (mv)", "mw": null, "orig_ambiguous": false, "orig_multi_value": true, "og_uid": "P60709;A0A6Q8PFE4;E7EVS6;A0A2R8Y793;P63261;I3L4N8;Q562R1", "sequence": "MDDDIAALVVDNGSGMCKAGFAGDDAPRAVFPSIVGRPRHQGVMVGMGQKDSYVGDEAQSKRGILTLKYPIEHGIVTNWDDMEKIWHHTFYNELRVAPEEHPVLLTEAPLNPKANREKMTQIMFETFNTP…
	{"uid": "E7EVS6", "roi": 17, "R": 0.760344329, "exp_thr": 5.0, "exp_bin": false, "source": "KC2023", "note": "CL1- (mv)", "mw": null, "orig_ambiguous": false, "orig_multi_value": true, "og_uid": "P60709;E7EVS6;A0A2R8Y793;A0A2R8YGF8;G5E9R0;A0A6Q8PH58;C9JUM1;C9JZR7;C9JTX5;A0A6Q8PGD7", "sequence": "MDDDIAALVVDNGSGMCKAGFAGDDAPRAVFPSIVGRPRHQGVMVGMGQKDSYVGDEAQSKRGILTLKYPIEHGIVTNWDDMEKIWHHTFYNELRVAPEEHP…
	{"uid": "Q9H7D3", "roi": 83, "R": 2.955801392, "exp_thr": 5.0, "exp_bin": false, "source": "KC2023", "note": "CL1- (mv)", "mw": null, "orig_ambiguous": false, "orig_multi_value": true, "og_uid": "Q9BQ70;H3BSP8;Q9H7D3;H3BTU3;H3BMJ8;H3BS87", "sequence": "MSRRALRRLRGEQRGQEPLGPGALHFDLRDDDDAEEEGPKRELGVRRPGGAGKEGVRVNNRFELINIDDLEDDPVVNGERSGCALTDAVAPGNKGRGQRGNTESKTDGDDTETVPSEQSHASGKLRKKKKKQKNKKSSTGEASENG…
	{"uid": "H3BTU3", "roi": 83, "R": 2.955801392, "exp_thr": 5.0, "exp_bin": false, "source": "KC2023", "note": "CL1- (mv)", "mw": null, "orig_ambiguous": false, "orig_multi_value": true, "og_uid": "Q9BQ70;H3BSP8;Q9H7D3;H3BTU3;H3BMJ8;H3BS87", "sequence": "MSRRALRRLRGEQRGQEPLGPGALHFDLRDDDDAEEEGPKRELGVRRPGGAGKEGVRVNNRFELINIDDLEDDPVVNGERSGCALTDAVAPGNKGRGQRGNTESKTDGDDTETVPSEQSHASGKLRKKKKKQKNKKSSTGEASENG…
	{"uid": "A0A087WUW6", "roi": 95, "R": 2.807908763, "exp_thr": 5.0, "exp_bin": false, "source": "KC2023", "note": "CL1- (mv)", "mw": null, "orig_ambiguous": false, "orig_multi_value": true, "og_uid": "A0A087WUW6;Q9Y6K9;A0A087X0G7;A0A087X1B1;C9JN51;C9JH59;C9JCG6;A0A087X1K7;C9J2V2", "sequence": "MNRHLWKSQLCEMVQPSGGPAADQDVLGEESPLGKPAMLHLPSEQGAPETLQRCLEENQELRDAIRQSNQILRERCEELLHFQASQREEKEFLMCKFQEARKLVE…
	{"uid": "A0A087WUW6", "roi": 54, "R": 0.417320167, "exp_thr": 5.0, "exp_bin": false, "source": "KC2023", "note": "CL1- (mv)", "mw": null, "orig_ambiguous": false, "orig_multi_value": true, "og_uid": "A0A087WUW6;Q9Y6K9;A0A087X0G7;A0A087X1B1;C9JN51;C9JH59;C9JCG6;C9J2V2", "sequence": "MNRHLWKSQLCEMVQPSGGPAADQDVLGEESPLGKPAMLHLPSEQGAPETLQRCLEENQELRDAIRQSNQILRERCEELLHFQASQREEKEFLMCKFQEARKLVERLGLEKLDLKR…
	{"uid": "A0A087X1B1", "roi": 95, "R": 2.807908763, "exp_thr": 5.0, "exp_bin": false, "source": "KC2023", "note": "CL1- (mv)", "mw": null, "orig_ambiguous": false, "orig_multi_value": true, "og_uid": "A0A087WUW6;Q9Y6K9;A0A087X0G7;A0A087X1B1;C9JN51;C9JH59;C9JCG6;A0A087X1K7;C9J2V2", "sequence": "MNRHLWKSQLCEMVQPSGGPAADQDVLGEESPLGKPAMLHLPSEQGAPETLQRCLEENQELRDAIRQSNQILRERCEELLHFQASQREEKEFLMCKFQEARKLVE…
	{"uid": "A0A087X1B1", "roi": 54, "R": 0.417320167, "exp_thr": 5.0, "exp_bin": false, "source": "KC2023", "note": "CL1- (mv)", "mw": null, "orig_ambiguous": false, "orig_multi_value": true, "og_uid": "A0A087WUW6;Q9Y6K9;A0A087X0G7;A0A087X1B1;C9JN51;C9JH59;C9JCG6;C9J2V2", "sequence": "MNRHLWKSQLCEMVQPSGGPAADQDVLGEESPLGKPAMLHLPSEQGAPETLQRCLEENQELRDAIRQSNQILRERCEELLHFQASQREEKEFLMCKFQEARKLVERLGLEKLDLKR…
	{"uid": "A0A087X0G7", "roi": 95, "R": 2.807908763, "exp_thr": 5.0, "exp_bin": false, "source": "KC2023", "note": "CL1- (mv)", "mw": null, "orig_ambiguous": false, "orig_multi_value": true, "og_uid": "A0A087WUW6;Q9Y6K9;A0A087X0G7;A0A087X1B1;C9JN51;C9JH59;C9JCG6;A0A087X1K7;C9J2V2", "sequence": "MNRHLWKSQLCEMVQPSGGPAADQDVLGEESPLGKPAMLHLPSEQGAPETLQRCLEENQELRDAIRQSNQILRERCEELLHFQASQREEKEFLMCKFQEARKLVE…
	{"uid": "A0A087X0G7", "roi": 54, "R": 0.417320167, "exp_thr": 5.0, "exp_bin": false, "source": "KC2023", "note": "CL1- (mv)", "mw": null, "orig_ambiguous": false, "orig_multi_value": true, "og_uid": "A0A087WUW6;Q9Y6K9;A0A087X0G7;A0A087X1B1;C9JN51;C9JH59;C9JCG6;C9J2V2", "sequence": "MNRHLWKSQLCEMVQPSGGPAADQDVLGEESPLGKPAMLHLPSEQGAPETLQRCLEENQELRDAIRQSNQILRERCEELLHFQASQREEKEFLMCKFQEARKLVERLGLEKLDLKR…
	{"uid": "A0A087X1K7", "roi": 95, "R": 2.807908763, "exp_thr": 5.0, "exp_bin": false, "source": "KC2023", "note": "CL1- (mv)", "mw": null, "orig_ambiguous": false, "orig_multi_value": true, "og_uid": "A0A087WUW6;Q9Y6K9;A0A087X0G7;A0A087X1B1;C9JN51;C9JH59;C9JCG6;A0A087X1K7;C9J2V2", "sequence": "MNRHLWKSQLCEMVQPSGGPAADQDVLGEESPLGKPAMLHLPSEQGAPETLQRCLEENQELRDAIRQSNQILRERCEELLHFQASQREEKEFLMCKFQEARKLVE…
	{"uid": "J3KR33", "roi": 163, "R": 3.152595029, "exp_thr": 5.0, "exp_bin": false, "source": "KC2023", "note": "CL1- (mv)", "mw": null, "orig_ambiguous": false, "orig_multi_value": true, "og_uid": "J3KR33;A0JLT2", "sequence": "MENFTALFGAQADPPPPPTALGFGPGKPPPPPPPPAGGGPGTAPPPTAATAPPGADKSGAGCGPFYLMRELPGSTELTGSTNLITHYNLEQAYNKFCGKKVKEKLSNFLPDLPGMIDLPGSHDNSSLRSLIEKPPILSSSFNPITGTMLAGFRLHTGPLPEQCRLMHIQPPKK…
	{"uid": "Q6ZMY6", "roi": 7, "R": 2.480194882, "exp_thr": 5.0, "exp_bin": false, "source": "KC2023", "note": "CL1- (mv)", "mw": null, "orig_ambiguous": false, "orig_multi_value": true, "og_uid": "K7EPH1;Q6ZMY6", "sequence": "MASPPRCSPTAHDRECKLPPPSAPASEYCPGKLSWGTMARALGRFKLSIPHTHLLATLDPLALDREPPPHLLPEKHQVPEKLIWGDQDPLSKIPFKILSGHEHAVSTCHFCVDDTKLLSGSYDCTVKLWDPVDGSVVRDFEHRPKAPVVECSITGDSSRVIAASYDKTVRAWDLE…
	{"uid": "K7EPH1", "roi": 7, "R": 2.480194882, "exp_thr": 5.0, "exp_bin": false, "source": "KC2023", "note": "CL1- (mv)", "mw": null, "orig_ambiguous": false, "orig_multi_value": true, "og_uid": "K7EPH1;Q6ZMY6", "sequence": "MASPPRCSPTAHDRECKLPPPSAPASEYCPGKLSWGTMARALGRFKLSIPHTHLLATLDPLALDREPPPHLLPEKHQVPEKLIWGDQDPLSKIPFKILSGHEHAVSTCHFCVDDTKLLSGSYDCTVKLWDPVDGSVVRDFEHRPKAPVVECSITGDSSSHCRIL", "mapped_…
	{"uid": "A0A7I2V529", "roi": 661, "R": 2.310471315, "exp_thr": 5.0, "exp_bin": false, "source": "KC2023", "note": "CL1- (mv)", "mw": null, "orig_ambiguous": false, "orig_multi_value": true, "og_uid": "Q92538;A0A669KBG8;A0A669KB10;A0A7P0RGV0;A0A7I2YQM2;A0A7I2V452;A0A7I2V2L5;A0A7I2YQ65;A0A7I2V529;A0A7I2V514;A0A7I2V4K2;A0A7I2V3Y5;A0A7I2V2L4", "sequence": "MVDKNIYIIQGEINIVVGAIKRNARWSTHTPLDEERDPLLHSFG…
	{"uid": "A0A7I2V529", "roi": 1173, "R": 1.31938283, "exp_thr": 5.0, "exp_bin": false, "source": "KC2023", "note": "CL1- (mv)", "mw": null, "orig_ambiguous": false, "orig_multi_value": true, "og_uid": "Q92538;A0A669KBG8;A0A669KB10;A0A7P0RGV0;A0A7I2YQM2;A0A7I2V452;A0A7I2V2L5;A0A7I2YQ65;A0A7I2V529;A0A7I2V514;A0A7I2V4K2;A0A7I2V3Y5;A0A7I2V2L4;A0A7I2V4E0;A0A7I2V5Z2;A0A7I2V2Y7;A0A7I2YQD3;A0A7I2V578", "s…
	{"uid": "A0A7I2V3Y5", "roi": 661, "R": 2.310471315, "exp_thr": 5.0, "exp_bin": false, "source": "KC2023", "note": "CL1- (mv)", "mw": null, "orig_ambiguous": false, "orig_multi_value": true, "og_uid": "Q92538;A0A669KBG8;A0A669KB10;A0A7P0RGV0;A0A7I2YQM2;A0A7I2V452;A0A7I2V2L5;A0A7I2YQ65;A0A7I2V529;A0A7I2V514;A0A7I2V4K2;A0A7I2V3Y5;A0A7I2V2L4", "sequence": "MVDKNIYIIQGEINIVVGAIKRNARWSTHTPLDEERDPLLHSFG…
	{"uid": "A0A7I2V3Y5", "roi": 1173, "R": 1.31938283, "exp_thr": 5.0, "exp_bin": false, "source": "KC2023", "note": "CL1- (mv)", "mw": null, "orig_ambiguous": false, "orig_multi_value": true, "og_uid": "Q92538;A0A669KBG8;A0A669KB10;A0A7P0RGV0;A0A7I2YQM2;A0A7I2V452;A0A7I2V2L5;A0A7I2YQ65;A0A7I2V529;A0A7I2V514;A0A7I2V4K2;A0A7I2V3Y5;A0A7I2V2L4;A0A7I2V4E0;A0A7I2V5Z2;A0A7I2V2Y7;A0A7I2YQD3;A0A7I2V578", "s…
	{"uid": "A0A7I2V2L4", "roi": 661, "R": 2.310471315, "exp_thr": 5.0, "exp_bin": false, "source": "KC2023", "note": "CL1- (mv)", "mw": null, "orig_ambiguous": false, "orig_multi_value": true, "og_uid": "Q92538;A0A669KBG8;A0A669KB10;A0A7P0RGV0;A0A7I2YQM2;A0A7I2V452;A0A7I2V2L5;A0A7I2YQ65;A0A7I2V529;A0A7I2V514;A0A7I2V4K2;A0A7I2V3Y5;A0A7I2V2L4", "sequence": "MVDKNIYIIQGEINIVVGAIKRNARWSTHTPLDEERDPLLHSFG…
	{"uid": "A0A7I2V2L4", "roi": 1173, "R": 1.31938283, "exp_thr": 5.0, "exp_bin": false, "source": "KC2023", "note": "CL1- (mv)", "mw": null, "orig_ambiguous": false, "orig_multi_value": true, "og_uid": "Q92538;A0A669KBG8;A0A669KB10;A0A7P0RGV0;A0A7I2YQM2;A0A7I2V452;A0A7I2V2L5;A0A7I2YQ65;A0A7I2V529;A0A7I2V514;A0A7I2V4K2;A0A7I2V3Y5;A0A7I2V2L4;A0A7I2V4E0;A0A7I2V5Z2;A0A7I2V2Y7;A0A7I2YQD3;A0A7I2V578", "s…
	{"uid": "A0A7I2V4K2", "roi": 661, "R": 2.310471315, "exp_thr": 5.0, "exp_bin": false, "source": "KC2023", "note": "CL1- (mv)", "mw": null, "orig_ambiguous": false, "orig_multi_value": true, "og_uid": "Q92538;A0A669KBG8;A0A669KB10;A0A7P0RGV0;A0A7I2YQM2;A0A7I2V452;A0A7I2V2L5;A0A7I2YQ65;A0A7I2V529;A0A7I2V514;A0A7I2V4K2;A0A7I2V3Y5;A0A7I2V2L4", "sequence": "MVDKNIYIIQGEINIVVGAIKRNARWSTHTPLDEERDPLLHSFG…
	{"uid": "A0A7I2V4K2", "roi": 1173, "R": 1.31938283, "exp_thr": 5.0, "exp_bin": false, "source": "KC2023", "note": "CL1- (mv)", "mw": null, "orig_ambiguous": false, "orig_multi_value": true, "og_uid": "Q92538;A0A669KBG8;A0A669KB10;A0A7P0RGV0;A0A7I2YQM2;A0A7I2V452;A0A7I2V2L5;A0A7I2YQ65;A0A7I2V529;A0A7I2V514;A0A7I2V4K2;A0A7I2V3Y5;A0A7I2V2L4;A0A7I2V4E0;A0A7I2V5Z2;A0A7I2V2Y7;A0A7I2YQD3;A0A7I2V578", "s…
	{"uid": "H0Y987", "roi": 200, "R": 2.282334922, "exp_thr": 5.0, "exp_bin": false, "source": "KC2023", "note": "CL1- (mv)", "mw": null, "orig_ambiguous": false, "orig_multi_value": true, "og_uid": "H0Y987;O95394;A0A494C0G1;A0A494C1Q4;J3KN95;A0A494C1E2;A0A087WT27;A0A494C163;A0A494C099;D6RIS6", "sequence": "MDLGAITKYSALHAKPNGLILQYGTAGFRTKAEHLDHVMFRMGLLAVLRSKQTKSTIGVMVTASHNPEEDNGVKLVDPLGEMLAPSWEEHATC…
	{"uid": "A0A494C0G1", "roi": 200, "R": 2.282334922, "exp_thr": 5.0, "exp_bin": false, "source": "KC2023", "note": "CL1- (mv)", "mw": null, "orig_ambiguous": false, "orig_multi_value": true, "og_uid": "H0Y987;O95394;A0A494C0G1;A0A494C1Q4;J3KN95;A0A494C1E2;A0A087WT27;A0A494C163;A0A494C099;D6RIS6", "sequence": "MDLGAITKYSALHAKPNGLILQYGTAGFRTKAEHLDHVMFRMGLLAVLRSKQTKSTIGVMVTASHNPEEDNGVKLVDPLGEMLAPSWEE…
	{"uid": "H0YLP6", "roi": 13, "R": 2.259881123, "exp_thr": 5.0, "exp_bin": false, "source": "KC2023", "note": "CL1- (mv)", "mw": null, "orig_ambiguous": false, "orig_multi_value": true, "og_uid": "H0YMF4;H0YKD8;P46779;H0YLP6", "sequence": "MSAHLQWMVVRNCSSFLIKRNKQTYSTEPNNLKARNSFRYNGLIHRKTVGVEPAADGKGVVVASGSLPPPMCGPPSTRMLAPRSAASDT", "mapped_roi": 13, "window_seq": "AHLQWMVVRNCSSFLIKRNKQ"}
	{"uid": "H0YLP6", "roi": 13, "R": 1.066632928, "exp_thr": 5.0, "exp_bin": false, "source": "KC2023", "note": "CL1- (mv)", "mw": null, "orig_ambiguous": false, "orig_multi_value": true, "og_uid": "H0YMF4;H0YKD8;P46779;H0YLP6", "sequence": "MSAHLQWMVVRNCSSFLIKRNKQTYSTEPNNLKARNSFRYNGLIHRKTVGVEPAADGKGVVVASGSLPPPMCGPPSTRMLAPRSAASDT", "mapped_roi": 13, "window_seq": "AHLQWMVVRNCSSFLIKRNKQ"}
	{"uid": "C4B7M2", "roi": 760, "R": 2.241330094, "exp_thr": 5.0, "exp_bin": false, "source": "KC2023", "note": "CL1- (mv)", "mw": null, "orig_ambiguous": false, "orig_multi_value": true, "og_uid": "C4B7M2;Q96JI7;H0YN34", "sequence": "MAAEEGVASAASAGGSWGTAAMGRVLPMLLVPVPAEAMGQLGSRAQLRTQPEALGSLTAAGSLQVLSLTPGSRGGGRCCLEGPFWHFLWEDSRNSSTPTEKPKLLALGENYELLIYEFNLKDGRCDATILYSCSREALQKLIDDQDISISLLSLRILSFHNNTSLL…
	{"uid": "H0YN34", "roi": 760, "R": 2.241330094, "exp_thr": 5.0, "exp_bin": false, "source": "KC2023", "note": "CL1- (mv)", "mw": null, "orig_ambiguous": false, "orig_multi_value": true, "og_uid": "C4B7M2;Q96JI7;H0YN34", "sequence": "MAAEEGVASAASAGGSWGTAAMGRVLPMLLVPVPAEAMGQLGSRAQLRTQPEALGSLTAAGSLQVLSLTPGSRGGGRCCLEGPFWHFLWEDSRNSSTPTEKPKLLALGENYELLIYEFNLKDGRCDATILYSCSREALQKLIDDQDISISLLSLRILSFHNNTSLL…
	{"uid": "A0A494C163", "roi": 200, "R": 2.282334922, "exp_thr": 5.0, "exp_bin": false, "source": "KC2023", "note": "CL1- (mv)", "mw": null, "orig_ambiguous": false, "orig_multi_value": true, "og_uid": "H0Y987;O95394;A0A494C0G1;A0A494C1Q4;J3KN95;A0A494C1E2;A0A087WT27;A0A494C163;A0A494C099;D6RIS6", "sequence": "MDLGAITKYSALHAKPNGLILQYGTAGFRTKAEHLDHVMFRMGLLAVLRSKQTKSTIGVMVTASHNPEEDNGVKLVDPLGEMLAPSWEE…
	{"uid": "H0YMF4", "roi": 13, "R": 2.259881123, "exp_thr": 5.0, "exp_bin": false, "source": "KC2023", "note": "CL1- (mv)", "mw": null, "orig_ambiguous": false, "orig_multi_value": true, "og_uid": "H0YMF4;H0YKD8;P46779;H0YLP6", "sequence": "MSAHLQWMVVRNCSSFLIKRNKQTYSTEPNNLKARNSFRYNGLIHRKTVGVEPAADGKGVVVVIKRRSGRKSGNCHRGGHPWRQGVGLGTGFPLGRLVSSVSRARLSPCPHL", "mapped_roi": 13, "window_seq": "AHLQWMVVRNCS…
	{"uid": "H0YMF4", "roi": 13, "R": 1.066632928, "exp_thr": 5.0, "exp_bin": false, "source": "KC2023", "note": "CL1- (mv)", "mw": null, "orig_ambiguous": false, "orig_multi_value": true, "og_uid": "H0YMF4;H0YKD8;P46779;H0YLP6", "sequence": "MSAHLQWMVVRNCSSFLIKRNKQTYSTEPNNLKARNSFRYNGLIHRKTVGVEPAADGKGVVVVIKRRSGRKSGNCHRGGHPWRQGVGLGTGFPLGRLVSSVSRARLSPCPHL", "mapped_roi": 13, "window_seq": "AHLQWMVVRNCS…
	{"uid": "H0YKD8", "roi": 13, "R": 2.259881123, "exp_thr": 5.0, "exp_bin": false, "source": "KC2023", "note": "CL1- (mv)", "mw": null, "orig_ambiguous": false, "orig_multi_value": true, "og_uid": "H0YMF4;H0YKD8;P46779;H0YLP6", "sequence": "MSAHLQWMVVRNCSSFLIKRNKQTYSTEPNNLKARNSFRYNGLIHRKTVGVEPAADGKGVVVVIKRRSGQRKPATSYVRTTINKNARATLSSIRHMIRKNKYRPDLRMLAGRVGRQQAVSSLEHQPRPGRLHLSNTAARSFCVMEPSRTLQDLGSTLGLH…
	{"uid": "H0YKD8", "roi": 13, "R": 1.066632928, "exp_thr": 5.0, "exp_bin": false, "source": "KC2023", "note": "CL1- (mv)", "mw": null, "orig_ambiguous": false, "orig_multi_value": true, "og_uid": "H0YMF4;H0YKD8;P46779;H0YLP6", "sequence": "MSAHLQWMVVRNCSSFLIKRNKQTYSTEPNNLKARNSFRYNGLIHRKTVGVEPAADGKGVVVVIKRRSGQRKPATSYVRTTINKNARATLSSIRHMIRKNKYRPDLRMLAGRVGRQQAVSSLEHQPRPGRLHLSNTAARSFCVMEPSRTLQDLGSTLGLH…
	{"uid": "A0A494C1Q4", "roi": 200, "R": 2.282334922, "exp_thr": 5.0, "exp_bin": false, "source": "KC2023", "note": "CL1- (mv)", "mw": null, "orig_ambiguous": false, "orig_multi_value": true, "og_uid": "H0Y987;O95394;A0A494C0G1;A0A494C1Q4;J3KN95;A0A494C1E2;A0A087WT27;A0A494C163;A0A494C099;D6RIS6", "sequence": "MDLGAITKYSALHAKPNGLILQYGTAGFRTKAEHLDHVMFRMGLLAVLRSKQTKSTIGVMVTASHNPEEDNGVKLVDPLGEMLAPSWEE…
	{"uid": "A0A494C099", "roi": 200, "R": 2.282334922, "exp_thr": 5.0, "exp_bin": false, "source": "KC2023", "note": "CL1- (mv)", "mw": null, "orig_ambiguous": false, "orig_multi_value": true, "og_uid": "H0Y987;O95394;A0A494C0G1;A0A494C1Q4;J3KN95;A0A494C1E2;A0A087WT27;A0A494C163;A0A494C099;D6RIS6", "sequence": "MDLGAITKYSALHAKPNGLILQYGTAGFRTKAEHLDHVMFRMGLLAVLRSKQTKSTIGVMVTASHNPEEDNGVKLVDPLGEMLAPSWEE…
	{"uid": "J3KT12", "roi": 66, "R": 2.195000801, "exp_thr": 5.0, "exp_bin": false, "source": "KC2023", "note": "CL1- (mv)", "mw": null, "orig_ambiguous": false, "orig_multi_value": true, "og_uid": "P60842;J3KT12;J3QS69;J3KTB5;J3QL43;J3QR64;J3QLN6;J3QKZ9;J3KS25;J3KS93;J3KT04;J3QQP0", "sequence": "MSASQDSRSRDNGPDGMEPEGVIESNWNEIVDSFDDMNLSESLLRGIYAYGFEKPSAIQQRAILPCIKGYDVIAQAQSGTGKTATFAISILQQIELDLKATQAL…
	{"uid": "J3QQP0", "roi": 66, "R": 2.195000801, "exp_thr": 5.0, "exp_bin": false, "source": "KC2023", "note": "CL1- (mv)", "mw": null, "orig_ambiguous": false, "orig_multi_value": true, "og_uid": "P60842;J3KT12;J3QS69;J3KTB5;J3QL43;J3QR64;J3QLN6;J3QKZ9;J3KS25;J3KS93;J3KT04;J3QQP0", "sequence": "MSASQDSRSRDNGPDGMEPEGVIESNWNEIVDSFDDMNLSESLLRGIYAYGFEKPSAIQQRAILPCIKDTEGGHGTRRLHGRLLSRLYRGHQRAC", "mappe…
	{"uid": "J3QL43", "roi": 66, "R": 2.195000801, "exp_thr": 5.0, "exp_bin": false, "source": "KC2023", "note": "CL1- (mv)", "mw": null, "orig_ambiguous": false, "orig_multi_value": true, "og_uid": "P60842;J3KT12;J3QS69;J3KTB5;J3QL43;J3QR64;J3QLN6;J3QKZ9;J3KS25;J3KS93;J3KT04;J3QQP0", "sequence": "MSASQDSRSRDNGPDGMEPEGVIESNWNEIVDSFDDMNLSESLLRGIYAYGFEKPSAIQQRAILPCIKGYDVIAQAQSGTGKTATFAISILQQIELDLKATQAL…
	{"uid": "J3QS69", "roi": 66, "R": 2.195000801, "exp_thr": 5.0, "exp_bin": false, "source": "KC2023", "note": "CL1- (mv)", "mw": null, "orig_ambiguous": false, "orig_multi_value": true, "og_uid": "P60842;J3KT12;J3QS69;J3KTB5;J3QL43;J3QR64;J3QLN6;J3QKZ9;J3KS25;J3KS93;J3KT04;J3QQP0", "sequence": "MSASQDSRSRDNGPDGMEPEGVIESNWNEIVDSFDDMNLSESLLRGIYAYGFEKPSAIQQRAILPCIKGYDVIAQAQSGTGKTATFAISILQQIELDLKATQAL…
	{"uid": "A0A494C1L5", "roi": 2664, "R": 2.170283042, "exp_thr": 5.0, "exp_bin": false, "source": "KC2023", "note": "CL1- (mv)", "mw": null, "orig_ambiguous": false, "orig_multi_value": true, "og_uid": "A0A494C1L5;P50851;A0A494BZW2;H0YAC6;A0A3B3IS13;H0YA17", "sequence": "MASEDNRVPSPPPTGDDGGGGGREETPTEGGALSLKPGLPIRGIRMKFAVLTGLVEVGEVSNRDIVETVFNLLVGGQFDLEMNFIIQEGESINCMVDLLEKCDITCQAEVWSMFTAILKKSIRNLQVC…
	{"uid": "A0A494C1L5", "roi": 1228, "R": 1.008263937, "exp_thr": 5.0, "exp_bin": false, "source": "KC2023", "note": "CL1- (mv)", "mw": null, "orig_ambiguous": false, "orig_multi_value": true, "og_uid": "A0A494C1L5;E9PEM5;P50851;A0A494BZW2;A0A494C0R9", "sequence": "MASEDNRVPSPPPTGDDGGGGGREETPTEGGALSLKPGLPIRGIRMKFAVLTGLVEVGEVSNRDIVETVFNLLVGGQFDLEMNFIIQEGESINCMVDLLEKCDITCQAEVWSMFTAILKKSIRNLQVCTEVGLVE…
	{"uid": "F5GZ78", "roi": 106, "R": 2.132129835, "exp_thr": 5.0, "exp_bin": false, "source": "KC2023", "note": "CL1- (mv)", "mw": null, "orig_ambiguous": false, "orig_multi_value": true, "og_uid": "F5GZ78;A0A1B0GTU4;P49023;F5H836;A0A1B0GU60", "sequence": "MADALLADLESTTSHISKRPVFLSEETPYSYPTGNHTYQEIAVPPPVPPPPSSEALNGTILDPLDQWQPSSSRFIHQQPQSSSPVYGSSAKTSSVSNPQDSVGSPCSRVGEEEHVYSFPNKQKSAEPSPTVMSTSLGSNLSELD…
	{"uid": "K7EL35", "roi": 25, "R": 2.124432577, "exp_thr": 5.0, "exp_bin": false, "source": "KC2023", "note": "CL1- (mv)", "mw": null, "orig_ambiguous": false, "orig_multi_value": true, "og_uid": "Q8IUC4;K7EL35", "sequence": "MTDALLPAAPQPLEKENDGYFRKGCNPLAQTGRSKLQNQRAALNQQILKAVRMRTGAENLLKVATNSKVREQVRLELSFVNSDLQMLKEELEGLNISVGVYQNTEILSWNITVKMAIYMKMKLQILWI", "mapped_roi": 25, "window_seq": "KENDGYFRKG…
	{"uid": "F1T0I1", "roi": 1797, "R": 2.112803997, "exp_thr": 5.0, "exp_bin": false, "source": "KC2023", "note": "CL1- (mv)", "mw": null, "orig_ambiguous": false, "orig_multi_value": true, "og_uid": "F1T0I1;O15027;A0A3F2YNZ0;A0A3F2YNX0;X6RGP5;A0A0C4DH09", "sequence": "MQPPPQTVPSGMAGPPPAGNPRSVFWASSPYRRRANNNAAVAPTTCPLQPVTDPFAFSRQALQSTPLGSSSKSSPPVLQGPAPAGFSQHPGLLVPHTHARDSSQGPCEPLPGPLTQPRAHASPFSGALTPSA…
	{"uid": "F1T0I1", "roi": 107, "R": 0.653364884, "exp_thr": 5.0, "exp_bin": false, "source": "KC2023", "note": "CL1- (mv)", "mw": null, "orig_ambiguous": false, "orig_multi_value": true, "og_uid": "F1T0I1;O15027", "sequence": "MQPPPQTVPSGMAGPPPAGNPRSVFWASSPYRRRANNNAAVAPTTCPLQPVTDPFAFSRQALQSTPLGSSSKSSPPVLQGPAPAGFSQHPGLLVPHTHARDSSQGPCEPLPGPLTQPRAHASPFSGALTPSAPPGPEMNRSAEVGPSSEPEVQTLPYLPHYIPGVDPETSHGG…
	{"uid": "F1T0I1", "roi": 1451, "R": 0.0, "exp_thr": 5.0, "exp_bin": false, "source": "KC2023", "note": "CL1- (mv)", "mw": null, "orig_ambiguous": false, "orig_multi_value": true, "og_uid": "F1T0I1;O15027;A0A3F2YNZ0;A0A3F2YNX0;X6RGP5", "sequence": "MQPPPQTVPSGMAGPPPAGNPRSVFWASSPYRRRANNNAAVAPTTCPLQPVTDPFAFSRQALQSTPLGSSSKSSPPVLQGPAPAGFSQHPGLLVPHTHARDSSQGPCEPLPGPLTQPRAHASPFSGALTPSAPPGPEMNRSAEVGPSSEPE…
	{"uid": "Q5STU3", "roi": 198, "R": 2.078881988, "exp_thr": 5.0, "exp_bin": false, "source": "KC2023", "note": "CL1- (mv)", "mw": null, "orig_ambiguous": false, "orig_multi_value": true, "og_uid": "Q13838;Q5STU3;A0A0G2JJZ9;A0A140T9X3;F6WLT2;F6S4E6;F6TRA5;A0A0A0MT12;A0A140TA18;F6UJC5;A0A140T996;A0A140T9X9;A0A140T9K1;A0A140T973;A0A140T9L4", "sequence": "MAENDVDNELLDYEDDEVETAAGGDGAEAPAKKDVKGSYVSIHSSG…
	{"uid": "K7ER39", "roi": 60, "R": 2.119934035, "exp_thr": 5.0, "exp_bin": false, "source": "KC2023", "note": "CL1- (mv)", "mw": null, "orig_ambiguous": false, "orig_multi_value": true, "og_uid": "O60664;K7EL96;K7ER39", "sequence": "MAGSGLELPFWSQRQASAAETMSADGAEADGSTQVTVEEPVQQPSVVDRVASMPLISSTCDMVSAAYASTKESYPHIKTVCDAAEKGVRTLTAAAVSGAQPILSKLEPQIASASEYAHRGLDKLEENLPILQQPTEKVLADTKELVSSKVSGAQEMVSSAKDTVATQ…
	{"uid": "E9PQ57", "roi": 106, "R": 2.074547617, "exp_thr": 5.0, "exp_bin": false, "source": "KC2023", "note": "CL1- (mv)", "mw": null, "orig_ambiguous": false, "orig_multi_value": true, "og_uid": "P78406;E9PQ57;E9PPG9;B0QZ36", "sequence": "MSLFGTTSGFGTSGTSMFGSATTDNHNPMKDIEVTSSPDDSIGCLSFSPPTLPGNFLIAGSWANDVRCWEVQDSGQTIPKAQQMHTGPVLDVCWSDDGSKVFTASCDKTAKMWDLSSNQAIQIAQHDAPVKTIHWIKAPNYSCVMTGSWDKTLKFWDTR…
	{"uid": "E9PPG9", "roi": 106, "R": 2.074547617, "exp_thr": 5.0, "exp_bin": false, "source": "KC2023", "note": "CL1- (mv)", "mw": null, "orig_ambiguous": false, "orig_multi_value": true, "og_uid": "P78406;E9PQ57;E9PPG9;B0QZ36", "sequence": "MSLFGTTSGFGTSGTSMFGSATTDNHNPMKDIEVTSSPDDSIGCLSFSPPTLPGNFLIAGSWANDVRCWEVQDSGQTIPKAQQMHTGPVLDVCWSDDGSKVFTASCDKTAKMWDLSSNQAIQIAQHDAPVKTIHWIKAPNYSCVMTGSWDKTLKFWDTR…
	{"uid": "E9PQ57", "roi": 106, "R": 2.074547617, "exp_thr": 5.0, "exp_bin": false, "source": "KC2023", "note": "CL1- (mv)", "mw": null, "orig_ambiguous": false, "orig_multi_value": true, "og_uid": "P78406;E9PQ57;E9PPG9;B0QZ36", "sequence": "MSLFGTTSGFGTSGTSMFGSATTDNHNPMKDIEVTSSPDDSIGCLSFSPPTLPGNFLIAGSWANDVRCWEVQDSGQTIPKAQQMHTGPVLDVCWSDDGSKVFTASCDKTAKMWDLSSNQAIQIAQHDAPVKTIHWIKAPNYSCVMTGSWDKTLKFWDTR…
	{"uid": "A0A2R8Y4S0", "roi": 133, "R": 2.051399809, "exp_thr": 5.0, "exp_bin": false, "source": "KC2023", "note": "CL1- (mv)", "mw": null, "orig_ambiguous": false, "orig_multi_value": true, "og_uid": "O15269;A0A2R8Y4S0;A0A2R8Y6A2;A0A2R8Y763", "sequence": "MATATEQWVLVEMVQALYEAPAYHLILEGILILWIIRLLFSKTYKLQERSDLTVKEKEELIEEWQPEPLVPPVPKDHPALNYNIVSGPPSHKTVVNGKECINFASFNFLGLLDNPRVKAAALASLKKYGVGTCGPRGFYGTFG…
	{"uid": "A0A2R8Y6A2", "roi": 133, "R": 2.051399809, "exp_thr": 5.0, "exp_bin": false, "source": "KC2023", "note": "CL1- (mv)", "mw": null, "orig_ambiguous": false, "orig_multi_value": true, "og_uid": "O15269;A0A2R8Y4S0;A0A2R8Y6A2;A0A2R8Y763", "sequence": "MATATEQWVLVEMVQALYEAPAYHLILEGILILWIIRLLFSKTYKLQERSDLTVKEKEELIEEWQPEPLVPPVPKDHPALNYNIVSGPPSHKTVVNGKECINFASFNFLGLLDNPRVKAAALASLKKYGVGTCGPRGFYGTFE…
	{"uid": "E9PFI5", "roi": 96, "R": 2.039363035, "exp_thr": 5.0, "exp_bin": false, "source": "KC2023", "note": "CL1- (mv)", "mw": null, "orig_ambiguous": false, "orig_multi_value": true, "og_uid": "P61247;E9PFI5;H0Y8L7;D6RG13;D6RAT0;D6RB09;D6RED7;D6RAS7", "sequence": "MAVGKNKRLTKGGKKGAKKKVVDPFSKKDWYDVKAPAMFNIRNIGKTLVTRTQGTKIASDGLKGRVFEVSLADLQNDEVAFRKFKLITEDVQGKNCLTNFHGMDLTRDKMCSMVKKWQTMIEAHVDVKTTDG…
	{"uid": "E9PFI5", "roi": 111, "R": 0.0, "exp_thr": 5.0, "exp_bin": false, "source": "KC2023", "note": "CL1- (mv)", "mw": null, "orig_ambiguous": false, "orig_multi_value": true, "og_uid": "P61247;E9PFI5;H0Y8L7;D6RG13;D6RAT0;D6RB09;D6RED7;D6RAS7", "sequence": "MAVGKNKRLTKGGKKGAKKKVVDPFSKKDWYDVKAPAMFNIRNIGKTLVTRTQGTKIASDGLKGRVFEVSLADLQNDEVAFRKFKLITEDVQGKNCLTNFHGMDLTRDKMCSMVKKWQTMIEAHVDVKTTDGYLLRLFC…
	{"uid": "C9JEJ2", "roi": 5, "R": 2.018283259, "exp_thr": 5.0, "exp_bin": false, "source": "KC2023", "note": "CL1- (mv)", "mw": null, "orig_ambiguous": false, "orig_multi_value": true, "og_uid": "C9JEJ2;P49585;C9J050;C9J2E1;C9JPY0;C9JVS0;F8WAZ5;F8WBU2", "sequence": "MDAQCSAKVNARKRRKEAPGPNGATEEDGVPSKVQRCAVGLRQPAPFSDEIEVDFSKPYVRVTMEEASRGTPCERPVRVYADGIFDLFHSGHARALMQAKNLFPNTYLIVGVCSDELTHNFKGFTVMNENERY…
	{"uid": "C9J2E1", "roi": 5, "R": 2.018283259, "exp_thr": 5.0, "exp_bin": false, "source": "KC2023", "note": "CL1- (mv)", "mw": null, "orig_ambiguous": false, "orig_multi_value": true, "og_uid": "C9JEJ2;P49585;C9J050;C9J2E1;C9JPY0;C9JVS0;F8WAZ5;F8WBU2", "sequence": "MDAQCSAKVNARKRRKEAPGPNGATEEDGVPSKVQRCAVGLRQPAPFSDEIEVDFSKPYVRVTMEEASRGTPCERPVRVYADGIFDLFHSGHARALMQAKNLFPNTYLIVGVCSDELTHNFKGFTVMNENERY…
	{"uid": "C9JEJ2", "roi": 5, "R": 2.018283259, "exp_thr": 5.0, "exp_bin": false, "source": "KC2023", "note": "CL1- (mv)", "mw": null, "orig_ambiguous": false, "orig_multi_value": true, "og_uid": "C9JEJ2;P49585;C9J050;C9J2E1;C9JPY0;C9JVS0;F8WAZ5;F8WBU2", "sequence": "MDAQCSAKVNARKRRKEAPGPNGATEEDGVPSKVQRCAVGLRQPAPFSDEIEVDFSKPYVRVTMEEASRGTPCERPVRVYADGIFDLFHSGHARALMQAKNLFPNTYLIVGVCSDELTHNFKGFTVMNENERY…
	{"uid": "C9JEJ2", "roi": 5, "R": 2.018283259, "exp_thr": 5.0, "exp_bin": false, "source": "KC2023", "note": "CL1- (mv)", "mw": null, "orig_ambiguous": false, "orig_multi_value": true, "og_uid": "C9JEJ2;P49585;C9J050;C9J2E1;C9JPY0;C9JVS0;F8WAZ5;F8WBU2", "sequence": "MDAQCSAKVNARKRRKEAPGPNGATEEDGVPSKVQRCAVGLRQPAPFSDEIEVDFSKPYVRVTMEEASRGTPCERPVRVYADGIFDLFHSGHARALMQAKNLFPNTYLIVGVCSDELTHNFKGFTVMNENERY…
	{"uid": "F8WAZ5", "roi": 5, "R": 2.018283259, "exp_thr": 5.0, "exp_bin": false, "source": "KC2023", "note": "CL1- (mv)", "mw": null, "orig_ambiguous": false, "orig_multi_value": true, "og_uid": "C9JEJ2;P49585;C9J050;C9J2E1;C9JPY0;C9JVS0;F8WAZ5;F8WBU2", "sequence": "MDAQCSAKVNARKRRKEAPGPNGATEEDGVPSKVQRCAVGLRQPAPFSDEIEVDFSKPYVRVTMEEASRGTPCERPVRVYADGIFDLFHSGHARALMQAKNLFPNTYLIVGDFFPVGEDGCSPKQWEKMGEVG…
	{"uid": "F8WBU2", "roi": 5, "R": 2.018283259, "exp_thr": 5.0, "exp_bin": false, "source": "KC2023", "note": "CL1- (mv)", "mw": null, "orig_ambiguous": false, "orig_multi_value": true, "og_uid": "C9JEJ2;P49585;C9J050;C9J2E1;C9JPY0;C9JVS0;F8WAZ5;F8WBU2", "sequence": "MDAQCSAKVNARKRRKEAPGPNGATEEDGVPSKVQRCAVSLQPLEATNLLSDSVDLPVLDIHTNDIIRAYGNQLLFLMKLKLTLVSPMSG", "mapped_roi": 5, "window_seq": "MDAQCSAK…
	{"uid": "A6NGJ0", "roi": 8, "R": 1.980076594, "exp_thr": 5.0, "exp_bin": false, "source": "KC2023", "note": "CL1- (mv)", "mw": null, "orig_ambiguous": false, "orig_multi_value": true, "og_uid": "A6NGJ0;P51808", "sequence": "MEEYHRHCDEVGFNAEEAHNIVKECVDGVLGGEDYNHNNINQWTASIVEQSLTHLVKLGKAYKYIVTCAVVQKSAYGFHTASSCFWDTTSDGTCTVRWENRTMNCGVLLCRPGWSAVMQFRLTATSASQVQVILLPQPPEYLELQAHAITPG", "mapped_roi": 8, "wi…
	{"uid": "Q9BYK1", "roi": 17, "R": 1.949338413, "exp_thr": 5.0, "exp_bin": false, "source": "KC2023", "note": "CL1- (mv)", "mw": null, "orig_ambiguous": false, "orig_multi_value": true, "og_uid": "Q8WVC2;P63220;Q9BYK1;Q9BYK2", "sequence": "MQNDAGEFVDLYVPRKCSASNRIIGAKDHASIQMNVAEVDKVTGRFNGQFKTYAICGAIRRMVSVSLGFAHHFGTSWTLPCALECVMVPE", "mapped_roi": 17, "window_seq": "EFVDLYVPRKCSASNRIIGAK"}
	{"uid": "Q9BYK1", "roi": 17, "R": 1.014472922, "exp_thr": 5.0, "exp_bin": false, "source": "KC2023", "note": "CL1- (mv)", "mw": null, "orig_ambiguous": false, "orig_multi_value": true, "og_uid": "Q8WVC2;P63220;Q9BYK1;Q9BYK2", "sequence": "MQNDAGEFVDLYVPRKCSASNRIIGAKDHASIQMNVAEVDKVTGRFNGQFKTYAICGAIRRMVSVSLGFAHHFGTSWTLPCALECVMVPE", "mapped_roi": 17, "window_seq": "EFVDLYVPRKCSASNRIIGAK"}
	{"uid": "Q9BYK1", "roi": 56, "R": 0.547844024, "exp_thr": 5.0, "exp_bin": false, "source": "KC2023", "note": "CL1- (mv)", "mw": null, "orig_ambiguous": false, "orig_multi_value": true, "og_uid": "Q8WVC2;P63220;Q9BYK1", "sequence": "MQNDAGEFVDLYVPRKCSASNRIIGAKDHASIQMNVAEVDKVTGRFNGQFKTYAICGAIRRMVSVSLGFAHHFGTSWTLPCALECVMVPE", "mapped_roi": 56, "window_seq": "FNGQFKTYAICGAIRRMVSVS"}
	{"uid": "Q9BYK2", "roi": 17, "R": 1.949338413, "exp_thr": 5.0, "exp_bin": false, "source": "KC2023", "note": "CL1- (mv)", "mw": null, "orig_ambiguous": false, "orig_multi_value": true, "og_uid": "Q8WVC2;P63220;Q9BYK1;Q9BYK2", "sequence": "MQNDAGEFVDLYVPRKCSASNRIIGAKDHASIQMNVAEVSWEPGRREGCDICAGKAGCPIVEEPLG", "mapped_roi": 17, "window_seq": "EFVDLYVPRKCSASNRIIGAK"}
	{"uid": "Q9BYK2", "roi": 17, "R": 1.014472922, "exp_thr": 5.0, "exp_bin": false, "source": "KC2023", "note": "CL1- (mv)", "mw": null, "orig_ambiguous": false, "orig_multi_value": true, "og_uid": "Q8WVC2;P63220;Q9BYK1;Q9BYK2", "sequence": "MQNDAGEFVDLYVPRKCSASNRIIGAKDHASIQMNVAEVSWEPGRREGCDICAGKAGCPIVEEPLG", "mapped_roi": 17, "window_seq": "EFVDLYVPRKCSASNRIIGAK"}
	{"uid": "A0A1B0GW44", "roi": 110, "R": 1.944394688, "exp_thr": 5.0, "exp_bin": false, "source": "KC2023", "note": "CL1- (mv)", "mw": null, "orig_ambiguous": false, "orig_multi_value": true, "og_uid": "A0A1B0GW44;A0A1B0GVP3;A0A1B0GV23;A0A1B0GVD5;A0A1B0GWE8;C9JH19;P07339;F8W787;A0A1B0GU92;A0A1B0GU03;F8WD96", "sequence": "MQPSSLLPLALCLLAAPASALVRIPLHKFTSIRRTMSEVGGSVEDLIAKGPVSKYSQAVPAVTEGPIPEAQYYGEIGI…
	{"uid": "A0A1B0GVP3", "roi": 110, "R": 1.944394688, "exp_thr": 5.0, "exp_bin": false, "source": "KC2023", "note": "CL1- (mv)", "mw": null, "orig_ambiguous": false, "orig_multi_value": true, "og_uid": "A0A1B0GW44;A0A1B0GVP3;A0A1B0GV23;A0A1B0GVD5;A0A1B0GWE8;C9JH19;P07339;F8W787;A0A1B0GU92;A0A1B0GU03;F8WD96", "sequence": "MQPSSLLPLALCLLAAPASALVRIPLHKFTSIRRTMSEVGGSVEDLIAKGPVSKYSQAVPAVTEGPIPEVLKNYMDAQ…
	{"uid": "A0A1B0GV23", "roi": 110, "R": 1.944394688, "exp_thr": 5.0, "exp_bin": false, "source": "KC2023", "note": "CL1- (mv)", "mw": null, "orig_ambiguous": false, "orig_multi_value": true, "og_uid": "A0A1B0GW44;A0A1B0GVP3;A0A1B0GV23;A0A1B0GVD5;A0A1B0GWE8;C9JH19;P07339;F8W787;A0A1B0GU92;A0A1B0GU03;F8WD96", "sequence": "MQPSSLLPLALCLLAAPASALVRIPLHKFTSIRRTMSEVGGSVEDLIAKGPVSKYSQAVPAVTEGPIPEVLKNYMDAQ…
	{"uid": "A0A1B0GVD5", "roi": 110, "R": 1.944394688, "exp_thr": 5.0, "exp_bin": false, "source": "KC2023", "note": "CL1- (mv)", "mw": null, "orig_ambiguous": false, "orig_multi_value": true, "og_uid": "A0A1B0GW44;A0A1B0GVP3;A0A1B0GV23;A0A1B0GVD5;A0A1B0GWE8;C9JH19;P07339;F8W787;A0A1B0GU92;A0A1B0GU03;F8WD96", "sequence": "MQPSSLLPLALCLLAAPASALVRIPLHKFTSIRRTMSEVGGSVEDLIAKGPVSKYSQAVPAVTEGPIPEVLKNYMDAQ…
	{"uid": "C9JH19", "roi": 110, "R": 1.944394688, "exp_thr": 5.0, "exp_bin": false, "source": "KC2023", "note": "CL1- (mv)", "mw": null, "orig_ambiguous": false, "orig_multi_value": true, "og_uid": "A0A1B0GW44;A0A1B0GVP3;A0A1B0GV23;A0A1B0GVD5;A0A1B0GWE8;C9JH19;P07339;F8W787;A0A1B0GU92;A0A1B0GU03;F8WD96", "sequence": "MQPSSLLPLALCLLAAPASALVRIPLHKFTSIRRTMSEVGGSVEDLIAKGPVSKYSQAVPAVTEGPIPEVLKNYMDAQYYGE…
	{"uid": "A0A1B0GU92", "roi": 110, "R": 1.944394688, "exp_thr": 5.0, "exp_bin": false, "source": "KC2023", "note": "CL1- (mv)", "mw": null, "orig_ambiguous": false, "orig_multi_value": true, "og_uid": "A0A1B0GW44;A0A1B0GVP3;A0A1B0GV23;A0A1B0GVD5;A0A1B0GWE8;C9JH19;P07339;F8W787;A0A1B0GU92;A0A1B0GU03;F8WD96", "sequence": "MQPSSLLPLALCLLAAPASALVRIPLHKFTSIRRTMSEVGGSVEDLIAKGPVSKYSQAVPAVTEGPIPEVLKNYMDAQ…
	{"uid": "A0A1B0GU03", "roi": 110, "R": 1.944394688, "exp_thr": 5.0, "exp_bin": false, "source": "KC2023", "note": "CL1- (mv)", "mw": null, "orig_ambiguous": false, "orig_multi_value": true, "og_uid": "A0A1B0GW44;A0A1B0GVP3;A0A1B0GV23;A0A1B0GVD5;A0A1B0GWE8;C9JH19;P07339;F8W787;A0A1B0GU92;A0A1B0GU03;F8WD96", "sequence": "MQPSSLLPLALCLLAAPASALVRIPLHKFTSIRRTMSEVGGSVEDLIAKGPVSKYSQAVPAVTEGPIPEVLKNYMDAQ…
	{"uid": "A0A1B0GU03", "roi": 110, "R": 1.944394688, "exp_thr": 5.0, "exp_bin": false, "source": "KC2023", "note": "CL1- (mv)", "mw": null, "orig_ambiguous": false, "orig_multi_value": true, "og_uid": "A0A1B0GW44;A0A1B0GVP3;A0A1B0GV23;A0A1B0GVD5;A0A1B0GWE8;C9JH19;P07339;F8W787;A0A1B0GU92;A0A1B0GU03;F8WD96", "sequence": "MQPSSLLPLALCLLAAPASALVRIPLHKFTSIRRTMSEVGGSVEDLIAKGPVSKYSQAVPAVTEGPIPEVLKNYMDAQ…
	{"uid": "A0A1W2PPU4", "roi": 104, "R": 1.944083153, "exp_thr": 5.0, "exp_bin": false, "source": "KC2023", "note": "CL1- (mv)", "mw": null, "orig_ambiguous": false, "orig_multi_value": true, "og_uid": "Q06124;A0A1W2PPU4", "sequence": "MTSRRWFHPNITGVEAENLLLTRGVDGSFLARPSKSNPGDFTLSVRRNGAVTHIKIQNTGDYYDLYGGEKFATLAELVQYYMEHHGQLKEKNGDVIELKYPLNCADPTSERWFHGHLSGKEAEKLLTEKGKHGSFLVRESQSHPGDFVLSVRTGDDKGESNDGKS…
	{"uid": "E7ENB8", "roi": 24, "R": 1.941318737, "exp_thr": 5.0, "exp_bin": false, "source": "KC2023", "note": "CL1- (mv)", "mw": null, "orig_ambiguous": false, "orig_multi_value": true, "og_uid": "E7ENB8;Q5VIY5;P17035;P0CJ79;E7EU70;Q6ZN06;M0QXU3;J3KR51;Q7L2R6;M0QZA4;E7EUL5;M0QYE7;M0R099;M0R0P3;M0R287;M0R327;F8WAL3;F5H026;M0QZA2;M0QX96;M0R367;M0R085;M0R0M5;M0QXU9;M0R2L4;A2RRD8;M0R183;Q3MIS6;Q6PDB4;…
	{"uid": "Q5VIY5", "roi": 24, "R": 1.941318737, "exp_thr": 5.0, "exp_bin": false, "source": "KC2023", "note": "CL1- (mv)", "mw": null, "orig_ambiguous": false, "orig_multi_value": true, "og_uid": "E7ENB8;Q5VIY5;P17035;P0CJ79;E7EU70;Q6ZN06;M0QXU3;J3KR51;Q7L2R6;M0QZA4;E7EUL5;M0QYE7;M0R099;M0R0P3;M0R287;M0R327;F8WAL3;F5H026;M0QZA2;M0QX96;M0R367;M0R085;M0R0M5;M0QXU9;M0R2L4;A2RRD8;M0R183;Q3MIS6;Q6PDB4;…
	{"uid": "Q5VIY5", "roi": 24, "R": 2.05, "exp_thr": 4.0, "exp_bin": false, "source": "YW2022", "note": "Ramos- (mv)", "mw": null, "orig_ambiguous": false, "orig_multi_value": true, "og_uid": "A2RRD8;P17035;Q3MIS6;Q5VIY5;Q6PDB4;Q6ZN06;Q7L2R6;Q8WV37;Q96IR2;Q9HCG1;Q9NV72", "sequence": "MALPQGLLTFRDVAIEFSQEEWKCLDPAQRTLYRDVMLENYRNLVSLDISSKCMLKTLSSTGQGNTEVIHTGTLHRQASHHIGEFCFHEIEKDIHGFEFQWKEDETNGHAAPMTEI…
	{"uid": "P0CJ79", "roi": 24, "R": 1.941318737, "exp_thr": 5.0, "exp_bin": false, "source": "KC2023", "note": "CL1- (mv)", "mw": null, "orig_ambiguous": false, "orig_multi_value": true, "og_uid": "E7ENB8;Q5VIY5;P17035;P0CJ79;E7EU70;Q6ZN06;M0QXU3;J3KR51;Q7L2R6;M0QZA4;E7EUL5;M0QYE7;M0R099;M0R0P3;M0R287;M0R327;F8WAL3;F5H026;M0QZA2;M0QX96;M0R367;M0R085;M0R0M5;M0QXU9;M0R2L4;A2RRD8;M0R183;Q3MIS6;Q6PDB4;…
	{"uid": "E7EU70", "roi": 24, "R": 1.941318737, "exp_thr": 5.0, "exp_bin": false, "source": "KC2023", "note": "CL1- (mv)", "mw": null, "orig_ambiguous": false, "orig_multi_value": true, "og_uid": "E7ENB8;Q5VIY5;P17035;P0CJ79;E7EU70;Q6ZN06;M0QXU3;J3KR51;Q7L2R6;M0QZA4;E7EUL5;M0QYE7;M0R099;M0R0P3;M0R287;M0R327;F8WAL3;F5H026;M0QZA2;M0QX96;M0R367;M0R085;M0R0M5;M0QXU9;M0R2L4;A2RRD8;M0R183;Q3MIS6;Q6PDB4;…
	{"uid": "M0QXU3", "roi": 24, "R": 1.941318737, "exp_thr": 5.0, "exp_bin": false, "source": "KC2023", "note": "CL1- (mv)", "mw": null, "orig_ambiguous": false, "orig_multi_value": true, "og_uid": "E7ENB8;Q5VIY5;P17035;P0CJ79;E7EU70;Q6ZN06;M0QXU3;J3KR51;Q7L2R6;M0QZA4;E7EUL5;M0QYE7;M0R099;M0R0P3;M0R287;M0R327;F8WAL3;F5H026;M0QZA2;M0QX96;M0R367;M0R085;M0R0M5;M0QXU9;M0R2L4;A2RRD8;M0R183;Q3MIS6;Q6PDB4;…
	{"uid": "M0QZA4", "roi": 24, "R": 1.941318737, "exp_thr": 5.0, "exp_bin": false, "source": "KC2023", "note": "CL1- (mv)", "mw": null, "orig_ambiguous": false, "orig_multi_value": true, "og_uid": "E7ENB8;Q5VIY5;P17035;P0CJ79;E7EU70;Q6ZN06;M0QXU3;J3KR51;Q7L2R6;M0QZA4;E7EUL5;M0QYE7;M0R099;M0R0P3;M0R287;M0R327;F8WAL3;F5H026;M0QZA2;M0QX96;M0R367;M0R085;M0R0M5;M0QXU9;M0R2L4;A2RRD8;M0R183;Q3MIS6;Q6PDB4;…
	{"uid": "E7EUL5", "roi": 24, "R": 1.941318737, "exp_thr": 5.0, "exp_bin": false, "source": "KC2023", "note": "CL1- (mv)", "mw": null, "orig_ambiguous": false, "orig_multi_value": true, "og_uid": "E7ENB8;Q5VIY5;P17035;P0CJ79;E7EU70;Q6ZN06;M0QXU3;J3KR51;Q7L2R6;M0QZA4;E7EUL5;M0QYE7;M0R099;M0R0P3;M0R287;M0R327;F8WAL3;F5H026;M0QZA2;M0QX96;M0R367;M0R085;M0R0M5;M0QXU9;M0R2L4;A2RRD8;M0R183;Q3MIS6;Q6PDB4;…
	{"uid": "M0QYE7", "roi": 24, "R": 1.941318737, "exp_thr": 5.0, "exp_bin": false, "source": "KC2023", "note": "CL1- (mv)", "mw": null, "orig_ambiguous": false, "orig_multi_value": true, "og_uid": "E7ENB8;Q5VIY5;P17035;P0CJ79;E7EU70;Q6ZN06;M0QXU3;J3KR51;Q7L2R6;M0QZA4;E7EUL5;M0QYE7;M0R099;M0R0P3;M0R287;M0R327;F8WAL3;F5H026;M0QZA2;M0QX96;M0R367;M0R085;M0R0M5;M0QXU9;M0R2L4;A2RRD8;M0R183;Q3MIS6;Q6PDB4;…
	{"uid": "M0R183", "roi": 24, "R": 1.941318737, "exp_thr": 5.0, "exp_bin": false, "source": "KC2023", "note": "CL1- (mv)", "mw": null, "orig_ambiguous": false, "orig_multi_value": true, "og_uid": "E7ENB8;Q5VIY5;P17035;P0CJ79;E7EU70;Q6ZN06;M0QXU3;J3KR51;Q7L2R6;M0QZA4;E7EUL5;M0QYE7;M0R099;M0R0P3;M0R287;M0R327;F8WAL3;F5H026;M0QZA2;M0QX96;M0R367;M0R085;M0R0M5;M0QXU9;M0R2L4;A2RRD8;M0R183;Q3MIS6;Q6PDB4;…
	{"uid": "M0QX96", "roi": 24, "R": 1.941318737, "exp_thr": 5.0, "exp_bin": false, "source": "KC2023", "note": "CL1- (mv)", "mw": null, "orig_ambiguous": false, "orig_multi_value": true, "og_uid": "E7ENB8;Q5VIY5;P17035;P0CJ79;E7EU70;Q6ZN06;M0QXU3;J3KR51;Q7L2R6;M0QZA4;E7EUL5;M0QYE7;M0R099;M0R0P3;M0R287;M0R327;F8WAL3;F5H026;M0QZA2;M0QX96;M0R367;M0R085;M0R0M5;M0QXU9;M0R2L4;A2RRD8;M0R183;Q3MIS6;Q6PDB4;…
	{"uid": "M0R183", "roi": 24, "R": 1.941318737, "exp_thr": 5.0, "exp_bin": false, "source": "KC2023", "note": "CL1- (mv)", "mw": null, "orig_ambiguous": false, "orig_multi_value": true, "og_uid": "E7ENB8;Q5VIY5;P17035;P0CJ79;E7EU70;Q6ZN06;M0QXU3;J3KR51;Q7L2R6;M0QZA4;E7EUL5;M0QYE7;M0R099;M0R0P3;M0R287;M0R327;F8WAL3;F5H026;M0QZA2;M0QX96;M0R367;M0R085;M0R0M5;M0QXU9;M0R2L4;A2RRD8;M0R183;Q3MIS6;Q6PDB4;…
	{"uid": "Q3MIS6", "roi": 24, "R": 1.941318737, "exp_thr": 5.0, "exp_bin": false, "source": "KC2023", "note": "CL1- (mv)", "mw": null, "orig_ambiguous": false, "orig_multi_value": true, "og_uid": "E7ENB8;Q5VIY5;P17035;P0CJ79;E7EU70;Q6ZN06;M0QXU3;J3KR51;Q7L2R6;M0QZA4;E7EUL5;M0QYE7;M0R099;M0R0P3;M0R287;M0R327;F8WAL3;F5H026;M0QZA2;M0QX96;M0R367;M0R085;M0R0M5;M0QXU9;M0R2L4;A2RRD8;M0R183;Q3MIS6;Q6PDB4;…
	{"uid": "Q3MIS6", "roi": 24, "R": 2.05, "exp_thr": 4.0, "exp_bin": false, "source": "YW2022", "note": "Ramos- (mv)", "mw": null, "orig_ambiguous": false, "orig_multi_value": true, "og_uid": "A2RRD8;P17035;Q3MIS6;Q5VIY5;Q6PDB4;Q6ZN06;Q7L2R6;Q8WV37;Q96IR2;Q9HCG1;Q9NV72", "sequence": "MALTQGPLKFMDVAIEFSQEEWKCLDPAQRTLYRDVMLENYRNLVSLGICLPDLSVTSMLEQKRDPWTLQSEEKIANDPDGRECIKGVNTERSSKLGSNAGNKPCKNQLGFTFQLH…
	{"uid": "A0A669KBJ2", "roi": 24, "R": 1.941318737, "exp_thr": 5.0, "exp_bin": false, "source": "KC2023", "note": "CL1- (mv)", "mw": null, "orig_ambiguous": false, "orig_multi_value": true, "og_uid": "E7ENB8;Q5VIY5;P17035;P0CJ79;E7EU70;Q6ZN06;M0QXU3;J3KR51;Q7L2R6;M0QZA4;E7EUL5;M0QYE7;M0R099;M0R0P3;M0R287;M0R327;F8WAL3;F5H026;M0QZA2;M0QX96;M0R367;M0R085;M0R0M5;M0QXU9;M0R2L4;A2RRD8;M0R183;Q3MIS6;Q6P…
	{"uid": "M0QXZ2", "roi": 24, "R": 1.941318737, "exp_thr": 5.0, "exp_bin": false, "source": "KC2023", "note": "CL1- (mv)", "mw": null, "orig_ambiguous": false, "orig_multi_value": true, "og_uid": "E7ENB8;Q5VIY5;P17035;P0CJ79;E7EU70;Q6ZN06;M0QXU3;J3KR51;Q7L2R6;M0QZA4;E7EUL5;M0QYE7;M0R099;M0R0P3;M0R287;M0R327;F8WAL3;F5H026;M0QZA2;M0QX96;M0R367;M0R085;M0R0M5;M0QXU9;M0R2L4;A2RRD8;M0R183;Q3MIS6;Q6PDB4;…
	{"uid": "L0R8M2", "roi": 24, "R": 1.941318737, "exp_thr": 5.0, "exp_bin": false, "source": "KC2023", "note": "CL1- (mv)", "mw": null, "orig_ambiguous": false, "orig_multi_value": true, "og_uid": "E7ENB8;Q5VIY5;P17035;P0CJ79;E7EU70;Q6ZN06;M0QXU3;J3KR51;Q7L2R6;M0QZA4;E7EUL5;M0QYE7;M0R099;M0R0P3;M0R287;M0R327;F8WAL3;F5H026;M0QZA2;M0QX96;M0R367;M0R085;M0R0M5;M0QXU9;M0R2L4;A2RRD8;M0R183;Q3MIS6;Q6PDB4;…
	{"uid": "M0R3A5", "roi": 24, "R": 1.941318737, "exp_thr": 5.0, "exp_bin": false, "source": "KC2023", "note": "CL1- (mv)", "mw": null, "orig_ambiguous": false, "orig_multi_value": true, "og_uid": "E7ENB8;Q5VIY5;P17035;P0CJ79;E7EU70;Q6ZN06;M0QXU3;J3KR51;Q7L2R6;M0QZA4;E7EUL5;M0QYE7;M0R099;M0R0P3;M0R287;M0R327;F8WAL3;F5H026;M0QZA2;M0QX96;M0R367;M0R085;M0R0M5;M0QXU9;M0R2L4;A2RRD8;M0R183;Q3MIS6;Q6PDB4;…
	{"uid": "M0QXZ2", "roi": 24, "R": 1.941318737, "exp_thr": 5.0, "exp_bin": false, "source": "KC2023", "note": "CL1- (mv)", "mw": null, "orig_ambiguous": false, "orig_multi_value": true, "og_uid": "E7ENB8;Q5VIY5;P17035;P0CJ79;E7EU70;Q6ZN06;M0QXU3;J3KR51;Q7L2R6;M0QZA4;E7EUL5;M0QYE7;M0R099;M0R0P3;M0R287;M0R327;F8WAL3;F5H026;M0QZA2;M0QX96;M0R367;M0R085;M0R0M5;M0QXU9;M0R2L4;A2RRD8;M0R183;Q3MIS6;Q6PDB4;…
	{"uid": "Q3MIS6", "roi": 24, "R": 1.941318737, "exp_thr": 5.0, "exp_bin": false, "source": "KC2023", "note": "CL1- (mv)", "mw": null, "orig_ambiguous": false, "orig_multi_value": true, "og_uid": "E7ENB8;Q5VIY5;P17035;P0CJ79;E7EU70;Q6ZN06;M0QXU3;J3KR51;Q7L2R6;M0QZA4;E7EUL5;M0QYE7;M0R099;M0R0P3;M0R287;M0R327;F8WAL3;F5H026;M0QZA2;M0QX96;M0R367;M0R085;M0R0M5;M0QXU9;M0R2L4;A2RRD8;M0R183;Q3MIS6;Q6PDB4;…
	{"uid": "A0A494C1D2", "roi": 24, "R": 1.941318737, "exp_thr": 5.0, "exp_bin": false, "source": "KC2023", "note": "CL1- (mv)", "mw": null, "orig_ambiguous": false, "orig_multi_value": true, "og_uid": "E7ENB8;Q5VIY5;P17035;P0CJ79;E7EU70;Q6ZN06;M0QXU3;J3KR51;Q7L2R6;M0QZA4;E7EUL5;M0QYE7;M0R099;M0R0P3;M0R287;M0R327;F8WAL3;F5H026;M0QZA2;M0QX96;M0R367;M0R085;M0R0M5;M0QXU9;M0R2L4;A2RRD8;M0R183;Q3MIS6;Q6P…
	{"uid": "A0A087WXU7", "roi": 24, "R": 1.941318737, "exp_thr": 5.0, "exp_bin": false, "source": "KC2023", "note": "CL1- (mv)", "mw": null, "orig_ambiguous": false, "orig_multi_value": true, "og_uid": "E7ENB8;Q5VIY5;P17035;P0CJ79;E7EU70;Q6ZN06;M0QXU3;J3KR51;Q7L2R6;M0QZA4;E7EUL5;M0QYE7;M0R099;M0R0P3;M0R287;M0R327;F8WAL3;F5H026;M0QZA2;M0QX96;M0R367;M0R085;M0R0M5;M0QXU9;M0R2L4;A2RRD8;M0R183;Q3MIS6;Q6P…
	{"uid": "Q6IQ01", "roi": 24, "R": 1.941318737, "exp_thr": 5.0, "exp_bin": false, "source": "KC2023", "note": "CL1- (mv)", "mw": null, "orig_ambiguous": false, "orig_multi_value": true, "og_uid": "E7ENB8;Q5VIY5;P17035;P0CJ79;E7EU70;Q6ZN06;M0QXU3;J3KR51;Q7L2R6;M0QZA4;E7EUL5;M0QYE7;M0R099;M0R0P3;M0R287;M0R327;F8WAL3;F5H026;M0QZA2;M0QX96;M0R367;M0R085;M0R0M5;M0QXU9;M0R2L4;A2RRD8;M0R183;Q3MIS6;Q6PDB4;…
	{"uid": "A0A087X2H1", "roi": 507, "R": 1.851545128, "exp_thr": 5.0, "exp_bin": false, "source": "KC2023", "note": "CL1- (mv)", "mw": null, "orig_ambiguous": false, "orig_multi_value": true, "og_uid": "Q9ULT8;A0A087X2H1;G3V4V5", "sequence": "MADVDPDTLLEWLQMGQGDERDMQLIALEQLCMLLLMSDNVDRCFETCPPRTFLPALCKIFLDESAPDNVLEVTARAITYYLDVSAECTRRIVGVDGAIKALCNRLVVVELNNRTSRDLAEQCVKVLELICTRESGAVFEAGGLNCVLTFIRDSGHLV…
	{"uid": "B7ZC38", "roi": 172, "R": 1.848405521, "exp_thr": 5.0, "exp_bin": false, "source": "KC2023", "note": "CL1- (mv)", "mw": null, "orig_ambiguous": false, "orig_multi_value": true, "og_uid": "B7ZC38;Q9NR46;B7ZC39", "sequence": "MDFNMKKLASDAGIFFTRAVQFTEEKFGQAEKTELDAHFENLLARADSTKNWTEKILRQTEVLLQPNPSARVEEFLYEKLDRKVPSRVTNGELLAQYMADAASELGPTTPYGKTLIKVAEAEKQLGAAERDFIHTASISFLTPLRNFLEGDWKTISKERRLLQNRR…
	{"uid": "B7ZC38", "roi": 267, "R": 1.823453333, "exp_thr": 5.0, "exp_bin": false, "source": "KC2023", "note": "CL1- (mv)", "mw": null, "orig_ambiguous": false, "orig_multi_value": true, "og_uid": "B7ZC38;Q9NR46;B7ZC39", "sequence": "MDFNMKKLASDAGIFFTRAVQFTEEKFGQAEKTELDAHFENLLARADSTKNWTEKILRQTEVLLQPNPSARVEEFLYEKLDRKVPSRVTNGELLAQYMADAASELGPTTPYGKTLIKVAEAEKQLGAAERDFIHTASISFLTPLRNFLEGDWKTISKERRLLQNRR…
	{"uid": "A0A0C4DGQ5", "roi": 144, "R": 1.834183586, "exp_thr": 5.0, "exp_bin": false, "source": "KC2023", "note": "CL1- (mv)", "mw": null, "orig_ambiguous": false, "orig_multi_value": true, "og_uid": "A0A0C4DGQ5;P04632;K7ELJ7;K7EIV0;A0A075B7C0;U3KQE2;K7EM73;K7EKD8;U3KPR7", "sequence": "MFLVNSFLKGGGGGGGGGGGLGGGLGNVLGGLISGAGGGGGGGGGGGGGGGGGGGGTAMRILGGVISAISEAAAQYNPEPPPPRTHYSNIEANESEEVRQFRRLFAQLAGDD…
	{"uid": "K7ELJ7", "roi": 144, "R": 1.834183586, "exp_thr": 5.0, "exp_bin": false, "source": "KC2023", "note": "CL1- (mv)", "mw": null, "orig_ambiguous": false, "orig_multi_value": true, "og_uid": "A0A0C4DGQ5;P04632;K7ELJ7;K7EIV0;A0A075B7C0;U3KQE2;K7EM73;K7EKD8;U3KPR7", "sequence": "MFLVNSFLKGGGGGGGGGGGLGGGLGNVLGGLISGAGGGGGGGGGGGGGGGGGGGGTAMRILGGVISAISEAAAQYNPEPPPPRTHYSNIEANESEEVRQFRRLFAQLAGDDMEVS…
	{"uid": "A0A0C4DGQ5", "roi": 144, "R": 1.834183586, "exp_thr": 5.0, "exp_bin": false, "source": "KC2023", "note": "CL1- (mv)", "mw": null, "orig_ambiguous": false, "orig_multi_value": true, "og_uid": "A0A0C4DGQ5;P04632;K7ELJ7;K7EIV0;A0A075B7C0;U3KQE2;K7EM73;K7EKD8;U3KPR7", "sequence": "MFLVNSFLKGGGGGGGGGGGLGGGLGNVLGGLISGAGGGGGGGGGGGGGGGGGGGGTAMRILGGVISAISEAAAQYNPEPPPPRTHYSNIEANESEEVRQFRRLFAQLAGDD…
	{"uid": "E9PFE3", "roi": 97, "R": 1.832934814, "exp_thr": 5.0, "exp_bin": false, "source": "KC2023", "note": "CL1- (mv)", "mw": null, "orig_ambiguous": false, "orig_multi_value": true, "og_uid": "E7ETZ4;Q9Y6E2;E7EMS9;Q75MG1;B5MCH7;E9PFE3;C9JF98;F8WDX8", "sequence": "MNKHQKPVLTGQRFKTRKRDEKEKFEPTVFRDTLVQGLNEAGDDLEAVAKFLDSTGSRLDYRRYADTLFDILVAGSMLAPGGTRIDDGDKTKMTNHCVFSANEDHETIRNYAQVFNKLIRRYKYLEKAFEDE…
	{"uid": "F8WDX8", "roi": 97, "R": 1.832934814, "exp_thr": 5.0, "exp_bin": false, "source": "KC2023", "note": "CL1- (mv)", "mw": null, "orig_ambiguous": false, "orig_multi_value": true, "og_uid": "E7ETZ4;Q9Y6E2;E7EMS9;Q75MG1;B5MCH7;E9PFE3;C9JF98;F8WDX8", "sequence": "MNKHQKPVLTGQRFKTRKRDEKEKFEPTVFRDTLVQGLNEAGDDLEAVAKFLDSTGSRLDYRRYADTLFDILVAGSMLAPGGTRIDDGDKTKMTNHCVFSANEDHETIRNYAQVFNKLIRRYKYLEKAFEDE…
	{"uid": "J3KNE0", "roi": 105, "R": 1.823631747, "exp_thr": 5.0, "exp_bin": false, "source": "KC2023", "note": "CL1- (mv)", "mw": null, "orig_ambiguous": false, "orig_multi_value": true, "og_uid": "P49792;C9J6W1;C9J1W9;C9JF75;J3KNE0;A6NKT7;Q7Z3J3;F8VYC4;A0A286YES2;A0A1W2PNU4;P0DJD0;P0DJD1;O14715;J3KQ37;Q99666;F8W705;Q05823", "sequence": "MSCSKAYGERYVASVQGSAPSPRKKSTRGFYFAKLYYEAKEYDLAKKYICTYINVREMDP…
	{"uid": "J3KNE0", "roi": 206, "R": 0.692724823, "exp_thr": 5.0, "exp_bin": false, "source": "KC2023", "note": "CL1- (mv)", "mw": null, "orig_ambiguous": false, "orig_multi_value": true, "og_uid": "P49792;H0YBN8;J3KNE0;A6NKT7;Q7Z3J3;F8VYC4;A0A286YES2;A0A1W2PNU4;P0DJD0;P0DJD1;O14715;J3KQ37;Q99666;F8W705", "sequence": "MSCSKAYGERYVASVQGSAPSPRKKSTRGFYFAKLYYEAKEYDLAKKYICTYINVREMDPRAHRFLGLLYELEENTEKAVE…
	{"uid": "J3KNE0", "roi": 220, "R": 0.150407625, "exp_thr": 5.0, "exp_bin": false, "source": "KC2023", "note": "CL1- (mv)", "mw": null, "orig_ambiguous": false, "orig_multi_value": true, "og_uid": "P49792;J3KNE0;A6NKT7;Q7Z3J3;F8VYC4;A0A286YES2;A0A1W2PNU4;P0DJD0;P0DJD1;O14715;Q99666;F8W705", "sequence": "MSCSKAYGERYVASVQGSAPSPRKKSTRGFYFAKLYYEAKEYDLAKKYICTYINVREMDPRAHRFLGLLYELEENTEKAVECYRRSVELNPTQKD…
	{"uid": "F8W705", "roi": 105, "R": 1.823631747, "exp_thr": 5.0, "exp_bin": false, "source": "KC2023", "note": "CL1- (mv)", "mw": null, "orig_ambiguous": false, "orig_multi_value": true, "og_uid": "P49792;C9J6W1;C9J1W9;C9JF75;J3KNE0;A6NKT7;Q7Z3J3;F8VYC4;A0A286YES2;A0A1W2PNU4;P0DJD0;P0DJD1;O14715;J3KQ37;Q99666;F8W705;Q05823", "sequence": "MRRSKADVERYVASVLGLTPSPRQKSMKGFYFAKLYYEAKEYDLAKKYICTYINVQERDP…
	{"uid": "F8W705", "roi": 206, "R": 0.692724823, "exp_thr": 5.0, "exp_bin": false, "source": "KC2023", "note": "CL1- (mv)", "mw": null, "orig_ambiguous": false, "orig_multi_value": true, "og_uid": "P49792;H0YBN8;J3KNE0;A6NKT7;Q7Z3J3;F8VYC4;A0A286YES2;A0A1W2PNU4;P0DJD0;P0DJD1;O14715;J3KQ37;Q99666;F8W705", "sequence": "MRRSKADVERYVASVLGLTPSPRQKSMKGFYFAKLYYEAKEYDLAKKYICTYINVQERDPKAHRFLGLLYELEENTEKAVE…
	{"uid": "F8W705", "roi": 220, "R": 0.150407625, "exp_thr": 5.0, "exp_bin": false, "source": "KC2023", "note": "CL1- (mv)", "mw": null, "orig_ambiguous": false, "orig_multi_value": true, "og_uid": "P49792;J3KNE0;A6NKT7;Q7Z3J3;F8VYC4;A0A286YES2;A0A1W2PNU4;P0DJD0;P0DJD1;O14715;Q99666;F8W705", "sequence": "MRRSKADVERYVASVLGLTPSPRQKSMKGFYFAKLYYEAKEYDLAKKYICTYINVQERDPKAHRFLGLLYELEENTEKAVECYRRSVELNPTQKD…
	{"uid": "F8WC37", "roi": 7, "R": 1.815398695, "exp_thr": 5.0, "exp_bin": false, "source": "KC2023", "note": "CL1- (mv)", "mw": null, "orig_ambiguous": false, "orig_multi_value": true, "og_uid": "P35250;F8WC37;H7C5G4;F8WDC9", "sequence": "MEVEAVCGGAGEVEAQDSDPAPAFSKAPGSAGHYELPWVEKYRPVKLNEIVGNEDTVSRLEVFAREGNVPNIIIAGH", "mapped_roi": 7, "window_seq": "MEVEAVCGGAGEVEAQD"}
	{"uid": "H7BXH2", "roi": 172, "R": 1.777749591, "exp_thr": 5.0, "exp_bin": false, "source": "KC2023", "note": "CL1- (mv)", "mw": null, "orig_ambiguous": false, "orig_multi_value": true, "og_uid": "H7BXH2;E9PKF6;Q5H9R7;E9PQP7;E9PNN8;E9PK08", "sequence": "MFWKFDLHSSSHIDTLLEREDVTLKELMDEEDVLQECKAQNRKLIEFLLKAECLEDLVSFIIEEPPQDMDEKIRYKYPNISCELLTSDVSQMNDRLGEDESLLMKLYSFLLNDSPLNPLLASFFSKVLSILISRKPEQIVDFLKK…
	{"uid": "H7BXH2", "roi": 798, "R": 1.021970112, "exp_thr": 5.0, "exp_bin": false, "source": "KC2023", "note": "CL1- (mv)", "mw": null, "orig_ambiguous": false, "orig_multi_value": true, "og_uid": "H7BXH2;E9PKF6;Q5H9R7;E9PQP7;H0YEN2", "sequence": "MFWKFDLHSSSHIDTLLEREDVTLKELMDEEDVLQECKAQNRKLIEFLLKAECLEDLVSFIIEEPPQDMDEKIRYKYPNISCELLTSDVSQMNDRLGEDESLLMKLYSFLLNDSPLNPLLASFFSKVLSILISRKPEQIVDFLKKKHDFVDL…
	{"uid": "H7BXH2", "roi": 784, "R": 0.671625595, "exp_thr": 5.0, "exp_bin": false, "source": "KC2023", "note": "CL1- (mv)", "mw": null, "orig_ambiguous": false, "orig_multi_value": true, "og_uid": "H7BXH2;E9PKF6;Q5H9R7;E9PQP7;H0YEN2", "sequence": "MFWKFDLHSSSHIDTLLEREDVTLKELMDEEDVLQECKAQNRKLIEFLLKAECLEDLVSFIIEEPPQDMDEKIRYKYPNISCELLTSDVSQMNDRLGEDESLLMKLYSFLLNDSPLNPLLASFFSKVLSILISRKPEQIVDFLKKKHDFVDL…
	{"uid": "E9PQ61", "roi": 636, "R": 1.768472675, "exp_thr": 5.0, "exp_bin": false, "source": "KC2023", "note": "CL1- (mv)", "mw": null, "orig_ambiguous": false, "orig_multi_value": true, "og_uid": "O75152;E9PQ61", "sequence": "MPNQGEDCYFFFYSTCTKGDSCPFRHCEAAIGNETVCTLWQEGRCFRQVCRFRHMEIDKKRSEIPCYWENQPTGCQKLNCAFHHNRGRYVDGLFLPPSKTVLPTVPESPEEEVKASQLSVQQNKLSVQSNPSPQLRSVMKVESSENVPSPTHPPVVINAADDDEDDDDQFSEE…
	{"uid": "J3KNQ3", "roi": 114, "R": 1.74681155, "exp_thr": 5.0, "exp_bin": false, "source": "KC2023", "note": "CL1- (mv)", "mw": null, "orig_ambiguous": false, "orig_multi_value": true, "og_uid": "A0A087WUL9;Q9UNM6;J3KNQ3;E9PL38;H0YD73", "sequence": "MKDVPGFLQQSQNSGPGQPAVWHRLEELYTKKLWHQLTLQVLDFVQDPCFAQGDGLIKLYENFISEFEHRVNPLSLVEIILHVVRQMTDPNVALTFLEKTREKVKSSDEAVILCKTAIGALKLNIGDLQVTKETIEDVEEMLNNLPGVT…
	{"uid": "A0A7I2YQK0", "roi": 14, "R": 1.726267761, "exp_thr": 5.0, "exp_bin": false, "source": "KC2023", "note": "CL1- (mv)", "mw": null, "orig_ambiguous": false, "orig_multi_value": true, "og_uid": "P49841;A0A7I2YQK0;A0A3B3ITW1;A0A7I2V4F3;A0A7I2V2U4;A0A7I2V2Y0;A0A7I2V3N7", "sequence": "MSGRPRTTSFAESCKPVQQPSAFGSMKVSRDKDGSKVTTVVATPGQGPDRPQEVSYTDTKVIGNGSFGVVYQAKLCDSGELVAIKKVLQDKRFKNRELQIMRKLDHCNIVR…
	{"uid": "A0A3B3ITW1", "roi": 14, "R": 1.726267761, "exp_thr": 5.0, "exp_bin": false, "source": "KC2023", "note": "CL1- (mv)", "mw": null, "orig_ambiguous": false, "orig_multi_value": true, "og_uid": "P49841;A0A7I2YQK0;A0A3B3ITW1;A0A7I2V4F3;A0A7I2V2U4;A0A7I2V2Y0;A0A7I2V3N7", "sequence": "MSGRPRTTSFAESCKPVQQPSAFGSMKVSRDKDGSKVTTVVATPGQGPDRPQEVSYTDTKVIGNGSFGVVYQAKLCDSGELVAIKKVLQDKRFKNRELQIMRKLDHCNIVR…
	{"uid": "A0A7I2V4F3", "roi": 14, "R": 1.726267761, "exp_thr": 5.0, "exp_bin": false, "source": "KC2023", "note": "CL1- (mv)", "mw": null, "orig_ambiguous": false, "orig_multi_value": true, "og_uid": "P49841;A0A7I2YQK0;A0A3B3ITW1;A0A7I2V4F3;A0A7I2V2U4;A0A7I2V2Y0;A0A7I2V3N7", "sequence": "MSGRPRTTSFAESCKPVQQPSAFGSMKVSMTSSTEVLNSSESSRIGDKDGSKVTTVVATPGQGPDRPQEVSYTDTKVIGNGSFGVVYQAKLCDSGELVAIKKVLQDKRFK"…
	{"uid": "A0A7I2V2U4", "roi": 14, "R": 1.726267761, "exp_thr": 5.0, "exp_bin": false, "source": "KC2023", "note": "CL1- (mv)", "mw": null, "orig_ambiguous": false, "orig_multi_value": true, "og_uid": "P49841;A0A7I2YQK0;A0A3B3ITW1;A0A7I2V4F3;A0A7I2V2U4;A0A7I2V2Y0;A0A7I2V3N7", "sequence": "MSGRPRTTSFAESCKPVQQPSAFGSMKVSKSRAPDHEKARSL", "mapped_roi": 14, "window_seq": "RPRTTSFAESCKPVQQPSAFG"}
	{"uid": "A0A7I2V2Y0", "roi": 14, "R": 1.726267761, "exp_thr": 5.0, "exp_bin": false, "source": "KC2023", "note": "CL1- (mv)", "mw": null, "orig_ambiguous": false, "orig_multi_value": true, "og_uid": "P49841;A0A7I2YQK0;A0A3B3ITW1;A0A7I2V4F3;A0A7I2V2U4;A0A7I2V2Y0;A0A7I2V3N7", "sequence": "MSGRPRTTSFAESCKPVQQPSAFGSMKVSSEQGRQQGDNSGGNSWAGSRQATRSQLYRH", "mapped_roi": 14, "window_seq": "RPRTTSFAESCKPVQQ…
	{"uid": "A0A7I2YQK0", "roi": 14, "R": 1.726267761, "exp_thr": 5.0, "exp_bin": false, "source": "KC2023", "note": "CL1- (mv)", "mw": null, "orig_ambiguous": false, "orig_multi_value": true, "og_uid": "P49841;A0A7I2YQK0;A0A3B3ITW1;A0A7I2V4F3;A0A7I2V2U4;A0A7I2V2Y0;A0A7I2V3N7", "sequence": "MSGRPRTTSFAESCKPVQQPSAFGSMKVSRDKDGSKVTTVVATPGQGPDRPQEVSYTDTKVIGNGSFGVVYQAKLCDSGELVAIKKVLQDKRFKNRELQIMRKLDHCNIVR…
	{"uid": "Q5T7C4", "roi": 23, "R": 1.681178565, "exp_thr": 5.0, "exp_bin": false, "source": "KC2023", "note": "CL1- (mv)", "mw": null, "orig_ambiguous": false, "orig_multi_value": true, "og_uid": "Q5T7C4;P09429;B2RPK0;P26583;D6R9A6", "sequence": "MGKGDPKKPRGKMSSYAFFVQTCREEHKKKHPDASVNFSEFSKKCSERWKTMSAKEKGKFEDMAKADKARYEREMKTYIPPKGETKKKFKDPNAPKRPPSAFFLFCSEYRPKIKGEHPGLSIGDVAKKLGEMWNNTAADDKQPYEKKAAKLKE…
	{"uid": "B2RPK0", "roi": 23, "R": 1.681178565, "exp_thr": 5.0, "exp_bin": false, "source": "KC2023", "note": "CL1- (mv)", "mw": null, "orig_ambiguous": false, "orig_multi_value": true, "og_uid": "Q5T7C4;P09429;B2RPK0;P26583;D6R9A6", "sequence": "MGKGDPKKPRGKMSSYAFFVQTCREEHKKKHSDASVNFSEFSNKCSERWKTMSAKEKGKFEDMAKADKTHYERQMKTYIPPKGETKKKFKDPNAPKRPPSAFFLFCSEYHPKIKGEHPGLSIGDVAKKLGEMWNNTAADDKQPGEKKAAKLKE…
	{"uid": "B2RPK0", "roi": 23, "R": 20.0, "exp_thr": 4.0, "exp_bin": true, "source": "KC2023", "note": "CL-Sc	(mv)", "mw": null, "orig_ambiguous": false, "orig_multi_value": true, "og_uid": "P26583;P09429;B2RPK0", "sequence": "MGKGDPKKPRGKMSSYAFFVQTCREEHKKKHSDASVNFSEFSNKCSERWKTMSAKEKGKFEDMAKADKTHYERQMKTYIPPKGETKKKFKDPNAPKRPPSAFFLFCSEYHPKIKGEHPGLSIGDVAKKLGEMWNNTAADDKQPGEKKAAKLKEKYEKDIAAYQAKGKPEAAKKGVVKAEKSKKKKEEEEDEEDEEDEEEEDEEDEEDDDDE", "mapped_roi": 23, "window_seq": "MSSYAFFVQTCREEHKKKHSD"}
	{"uid": "B2RPK0", "roi": 23, "R": 1.188254334, "exp_thr": 4.0, "exp_bin": false, "source": "KC2023", "note": "CL-Sc- (mv)", "mw": null, "orig_ambiguous": false, "orig_multi_value": true, "og_uid": "P26583;P09429;B2RPK0", "sequence": "MGKGDPKKPRGKMSSYAFFVQTCREEHKKKHSDASVNFSEFSNKCSERWKTMSAKEKGKFEDMAKADKTHYERQMKTYIPPKGETKKKFKDPNAPKRPPSAFFLFCSEYHPKIKGEHPGLSIGDVAKKLGEMWNNTAADDKQPGEKKAAKLKEKYEKDIAAYQAK…
	{"uid": "B2RPK0", "roi": 23, "R": 0.233462274, "exp_thr": 4.0, "exp_bin": false, "source": "KC2023", "note": "CL-Sc- (mv)", "mw": null, "orig_ambiguous": false, "orig_multi_value": true, "og_uid": "P26583;P09429;B2RPK0", "sequence": "MGKGDPKKPRGKMSSYAFFVQTCREEHKKKHSDASVNFSEFSNKCSERWKTMSAKEKGKFEDMAKADKTHYERQMKTYIPPKGETKKKFKDPNAPKRPPSAFFLFCSEYHPKIKGEHPGLSIGDVAKKLGEMWNNTAADDKQPGEKKAAKLKEKYEKDIAAYQAK…
	{"uid": "B2RPK0", "roi": 23, "R": 0.0, "exp_thr": 4.0, "exp_bin": false, "source": "KC2023", "note": "CL-Sc- (mv)", "mw": null, "orig_ambiguous": false, "orig_multi_value": true, "og_uid": "P26583;P09429;B2RPK0", "sequence": "MGKGDPKKPRGKMSSYAFFVQTCREEHKKKHSDASVNFSEFSNKCSERWKTMSAKEKGKFEDMAKADKTHYERQMKTYIPPKGETKKKFKDPNAPKRPPSAFFLFCSEYHPKIKGEHPGLSIGDVAKKLGEMWNNTAADDKQPGEKKAAKLKEKYEKDIAAYQAKGKPEAAKK…
	{"uid": "F8WJN3", "roi": 159, "R": 1.679011957, "exp_thr": 5.0, "exp_bin": false, "source": "KC2023", "note": "CL1- (mv)", "mw": null, "orig_ambiguous": false, "orig_multi_value": true, "og_uid": "F8WJN3;Q16630", "sequence": "MADGVDHIDIYADVGEEFNQEAEYGGHDQIDLYDDVISPSANNGDAPEDRDYMDTLPPTVGDDVGKGAAPNVVYTYTGKRIALYIGNLTWWTTDEDLTEAVHSLGVNDILEIKFFENRANGQSKGFALVGVGSEASSKKLMDLLPKRELHGQNPVVTPCNKQFLSQFEMQSRK…
	{"uid": "F8WJN3", "roi": 159, "R": 0.521308193, "exp_thr": 5.0, "exp_bin": false, "source": "KC2023", "note": "CL1- (mv)", "mw": null, "orig_ambiguous": false, "orig_multi_value": true, "og_uid": "F8WJN3;Q16630", "sequence": "MADGVDHIDIYADVGEEFNQEAEYGGHDQIDLYDDVISPSANNGDAPEDRDYMDTLPPTVGDDVGKGAAPNVVYTYTGKRIALYIGNLTWWTTDEDLTEAVHSLGVNDILEIKFFENRANGQSKGFALVGVGSEASSKKLMDLLPKRELHGQNPVVTPCNKQFLSQFEMQSRK…
	{"uid": "A0A7P0TAE3", "roi": 94, "R": 1.657009693, "exp_thr": 5.0, "exp_bin": false, "source": "KC2023", "note": "CL1- (mv)", "mw": null, "orig_ambiguous": false, "orig_multi_value": true, "og_uid": "A0A7P0TAE3;Q9ULX6;A0A7P0TAJ5;A0A7P0T847;A0A7P0TBP0;V9GZ50;A0A7P0T9N5;A0A7P0TAD3;M0R1Y5;M0R010;M0QYT7", "sequence": "MSYTGFVQGSETTLQSTYSDTSAQPTCDYGYGTWNSGTNRGYEGYGYGYGYGQDNTTNYGINQRLDMVPHLETDMMQGGVYGS…
	{"uid": "A0A7P0TAE3", "roi": 27, "R": 1.383974224, "exp_thr": 5.0, "exp_bin": false, "source": "KC2023", "note": "CL1- (mv)", "mw": null, "orig_ambiguous": false, "orig_multi_value": true, "og_uid": "A0A7P0TAE3;Q9ULX6;A0A7P0TAJ5;A0A7P0T847;A0A7P0TBP0;V9GZ50;A0A7P0T9N5;A0A7P0TAD3;M0R1L5;A0A7P0T8N3;M0R008", "sequence": "MSYTGFVQGSETTLQSTYSDTSAQPTCDYGYGTWNSGTNRGYEGYGYGYGYGQDNTTNYGINQRLDMVPHLETDMMQGG…
	{"uid": "V9GZ50", "roi": 94, "R": 1.657009693, "exp_thr": 5.0, "exp_bin": false, "source": "KC2023", "note": "CL1- (mv)", "mw": null, "orig_ambiguous": false, "orig_multi_value": true, "og_uid": "A0A7P0TAE3;Q9ULX6;A0A7P0TAJ5;A0A7P0T847;A0A7P0TBP0;V9GZ50;A0A7P0T9N5;A0A7P0TAD3;M0R1Y5;M0R010;M0QYT7", "sequence": "MSYTGFVQGSETTLQSTYSDTSAQPTCDYGYGTWNSGTNRGYEGYGYGYGYGQDNTTNYGINQRLDMVPHLETDMMQGGVYGSGGER…
	{"uid": "V9GZ50", "roi": 27, "R": 1.383974224, "exp_thr": 5.0, "exp_bin": false, "source": "KC2023", "note": "CL1- (mv)", "mw": null, "orig_ambiguous": false, "orig_multi_value": true, "og_uid": "A0A7P0TAE3;Q9ULX6;A0A7P0TAJ5;A0A7P0T847;A0A7P0TBP0;V9GZ50;A0A7P0T9N5;A0A7P0TAD3;M0R1L5;A0A7P0T8N3;M0R008", "sequence": "MSYTGFVQGSETTLQSTYSDTSAQPTCDYGYGTWNSGTNRGYEGYGYGYGYGQDNTTNYGINQRLDMVPHLETDMMQGGVYGS…
	{"uid": "A2RQR6", "roi": 34, "R": 1.656238119, "exp_thr": 5.0, "exp_bin": false, "source": "KC2023", "note": "CL1- (mv)", "mw": null, "orig_ambiguous": false, "orig_multi_value": true, "og_uid": "Q96EI5;A2RQR6;D6RD44;D6RCE9;D6RIH3;J3KQY4;D6RHZ1", "sequence": "MEKLYSENEGMASNQGKMENEEQPQDERKPEVTCTLEDKKLENEGKTENKGKTGDEEMLKDKGKPEIEGKPESEGEPGSETRAAGKRPAEDDVPRKAKRKTNKGLAHYLKEYKEAIHDMNFSNEDMIREFDNMAKVQDE…
	{"uid": "J3KS08", "roi": 33, "R": 1.645146225, "exp_thr": 5.0, "exp_bin": false, "source": "KC2023", "note": "CL1- (mv)", "mw": null, "orig_ambiguous": false, "orig_multi_value": true, "og_uid": "Q8IX18;J3KS08;J3KSX9", "sequence": "MSRFPAVAGRAPRRQEEGERSRDLQEERLSAVCIADREEKGCTSQEGGTTPTFPIQKQRKKIIQAGFHNMV", "mapped_roi": 33, "window_seq": "DLQEERLSAVCIADREEKGCT"}
	{"uid": "J3KSX9", "roi": 33, "R": 1.645146225, "exp_thr": 5.0, "exp_bin": false, "source": "KC2023", "note": "CL1- (mv)", "mw": null, "orig_ambiguous": false, "orig_multi_value": true, "og_uid": "Q8IX18;J3KS08;J3KSX9", "sequence": "MSRFPAVAGRAPRRQEEGERSRDLQEERLSAVCIADREEKGCTSQEGGTTPTFPIQKQRKKIIQAVRDNSFLIVTGNTGSGKTTQLPKYLYEAGDSNQIYD", "mapped_roi": 33, "window_seq": "DLQEERLSAVCIADREEKGCT"}
	{"uid": "A0A7I2YQK9", "roi": 211, "R": 1.630662947, "exp_thr": 5.0, "exp_bin": false, "source": "KC2023", "note": "CL1- (mv)", "mw": null, "orig_ambiguous": false, "orig_multi_value": true, "og_uid": "P07858;A0A7I2V440;A0A7I2V668;E9PHZ5;A0A7P0NGZ6;A0A7I2YQK9;E9PQM1;E9PR21", "sequence": "MWQLWASLCCLLVLANARSRPSFHPLSDELVNYVNKRNTTWQAGHNFYNVDMSYLKRLCGTFLGGPKPPQRVMFTEDLKLPASFDAREQWPQCPTIKEIRDQGSCGSCWAF…
	{"uid": "E9PR21", "roi": 211, "R": 1.630662947, "exp_thr": 5.0, "exp_bin": false, "source": "KC2023", "note": "CL1- (mv)", "mw": null, "orig_ambiguous": false, "orig_multi_value": true, "og_uid": "P07858;A0A7I2V440;A0A7I2V668;E9PHZ5;A0A7P0NGZ6;A0A7I2YQK9;E9PQM1;E9PR21", "sequence": "MWQLWASLCCLLVLANARSRPSFHPLSDELVNYVNKRNTTWQAGHNFYNVDMSYLKRLCGTFLGGPKPPQRVMFTEDLKLPASFDAREQWPQCPTIKEIRDQGSCGSCWAFGAVE…
	{"uid": "H0Y5B4", "roi": 88, "R": 1.628302417, "exp_thr": 5.0, "exp_bin": false, "source": "KC2023", "note": "CL1- (mv)", "mw": null, "orig_ambiguous": false, "orig_multi_value": true, "og_uid": "H0Y5B4;H7BZ11;J3KQN4;P83881;Q969Q0;R4GN19", "sequence": "MVNVPKTRRTFCKKCGKHQPHKVTQYKKGKDSLYAQGKRRYDRKQSGYGGQTKPIFRKKAKTTKKIVLRLECVEPNCRSKRMLAIKRCKHFELGGDKKRKVYNYGWKVQSFS", "mapped_roi": 88, "window_seq":…
	{"uid": "A0A7I2YQV4", "roi": 164, "R": 1.617198787, "exp_thr": 5.0, "exp_bin": false, "source": "KC2023", "note": "CL1- (mv)", "mw": null, "orig_ambiguous": false, "orig_multi_value": true, "og_uid": "O14980;A0A7I2V461;A0A7I2V2Y6;A0A7I2YQV4;A0A7I2V3P3;A0A7I2V2S3;A0A7I2V3W6;A0A7I2V3N0;A0A7I2V6B9;A0A7I2YQX3;A0A7I2V4A3;C9JKM9", "sequence": "MPAIMTMLADHAARQLLDFSQKLDINLLDNVVNCLYHGEGAQQRMAQEVLTHLKEHPDA…
	{"uid": "A0A7I2YQV4", "roi": 528, "R": 0.415214458, "exp_thr": 5.0, "exp_bin": false, "source": "KC2023", "note": "CL1- (mv)", "mw": null, "orig_ambiguous": false, "orig_multi_value": true, "og_uid": "O14980;A0A7I2V461;A0A7I2V2Y6;A0A7I2YQV4;A0A7I2V3P3;A0A7I2V2H0;A0A7I2V2S3;A0A7I2V3W6;A0A7I2V3N0;A0A7I2V6B9;A0A7I2YQX3;A0A7I2V4A3;A0A7I2V488", "sequence": "MPAIMTMLADHAARQLLDFSQKLDINLLDNVVNCLYHGEGAQQR…
	{"uid": "A0A7I2YQV4", "roi": 119, "R": 0.0, "exp_thr": 5.0, "exp_bin": false, "source": "KC2023", "note": "CL1- (mv)", "mw": null, "orig_ambiguous": false, "orig_multi_value": true, "og_uid": "O14980;A0A7I2V2Y6;A0A7I2YQV4;A0A7I2V3P3;A0A7I2V2S3;A0A7I2V3W6;A0A7I2V3N0;A0A7I2YQX3;A0A7I2V4A3;C9JKM9;C9J673", "sequence": "MPAIMTMLADHAARQLLDFSQKLDINLLDNVVNCLYHGEGAQQRMAQEVLTHLKEHPDAWTRVDTILEFSQNMNTKYYGLQI…
	{"uid": "A0A7I2V3P3", "roi": 164, "R": 1.617198787, "exp_thr": 5.0, "exp_bin": false, "source": "KC2023", "note": "CL1- (mv)", "mw": null, "orig_ambiguous": false, "orig_multi_value": true, "og_uid": "O14980;A0A7I2V461;A0A7I2V2Y6;A0A7I2YQV4;A0A7I2V3P3;A0A7I2V2S3;A0A7I2V3W6;A0A7I2V3N0;A0A7I2V6B9;A0A7I2YQX3;A0A7I2V4A3;C9JKM9", "sequence": "MPAIMTMLADHAARQLLDFSQKLDINLLDNVVNCLYHGEGAQQRMAQEVLTHLKEHPDA…
	{"uid": "A0A7I2V3P3", "roi": 528, "R": 0.415214458, "exp_thr": 5.0, "exp_bin": false, "source": "KC2023", "note": "CL1- (mv)", "mw": null, "orig_ambiguous": false, "orig_multi_value": true, "og_uid": "O14980;A0A7I2V461;A0A7I2V2Y6;A0A7I2YQV4;A0A7I2V3P3;A0A7I2V2H0;A0A7I2V2S3;A0A7I2V3W6;A0A7I2V3N0;A0A7I2V6B9;A0A7I2YQX3;A0A7I2V4A3;A0A7I2V488", "sequence": "MPAIMTMLADHAARQLLDFSQKLDINLLDNVVNCLYHGEGAQQR…
	{"uid": "A0A7I2V3P3", "roi": 119, "R": 0.0, "exp_thr": 5.0, "exp_bin": false, "source": "KC2023", "note": "CL1- (mv)", "mw": null, "orig_ambiguous": false, "orig_multi_value": true, "og_uid": "O14980;A0A7I2V2Y6;A0A7I2YQV4;A0A7I2V3P3;A0A7I2V2S3;A0A7I2V3W6;A0A7I2V3N0;A0A7I2YQX3;A0A7I2V4A3;C9JKM9;C9J673", "sequence": "MPAIMTMLADHAARQLLDFSQKLDINLLDNVVNCLYHGEGAQQRMAQEVLTHLKEHPDAWTRVDTILEFSQNMNTKYYGLQI…
	{"uid": "A0A7I2V3N0", "roi": 164, "R": 1.617198787, "exp_thr": 5.0, "exp_bin": false, "source": "KC2023", "note": "CL1- (mv)", "mw": null, "orig_ambiguous": false, "orig_multi_value": true, "og_uid": "O14980;A0A7I2V461;A0A7I2V2Y6;A0A7I2YQV4;A0A7I2V3P3;A0A7I2V2S3;A0A7I2V3W6;A0A7I2V3N0;A0A7I2V6B9;A0A7I2YQX3;A0A7I2V4A3;C9JKM9", "sequence": "MPAIMTMLADHAARQLLDFSQKLDINLLDNVVNCLYHGEGAQQRMAQEVLTHLKEHPDA…
	{"uid": "A0A7I2V3N0", "roi": 528, "R": 0.415214458, "exp_thr": 5.0, "exp_bin": false, "source": "KC2023", "note": "CL1- (mv)", "mw": null, "orig_ambiguous": false, "orig_multi_value": true, "og_uid": "O14980;A0A7I2V461;A0A7I2V2Y6;A0A7I2YQV4;A0A7I2V3P3;A0A7I2V2H0;A0A7I2V2S3;A0A7I2V3W6;A0A7I2V3N0;A0A7I2V6B9;A0A7I2YQX3;A0A7I2V4A3;A0A7I2V488", "sequence": "MPAIMTMLADHAARQLLDFSQKLDINLLDNVVNCLYHGEGAQQR…
	{"uid": "A0A7I2V3N0", "roi": 119, "R": 0.0, "exp_thr": 5.0, "exp_bin": false, "source": "KC2023", "note": "CL1- (mv)", "mw": null, "orig_ambiguous": false, "orig_multi_value": true, "og_uid": "O14980;A0A7I2V2Y6;A0A7I2YQV4;A0A7I2V3P3;A0A7I2V2S3;A0A7I2V3W6;A0A7I2V3N0;A0A7I2YQX3;A0A7I2V4A3;C9JKM9;C9J673", "sequence": "MPAIMTMLADHAARQLLDFSQKLDINLLDNVVNCLYHGEGAQQRMAQEVLTHLKEHPDAWTRVDTILEFSQNMNTKYYGLQI…
	{"uid": "A0A7I2V4A3", "roi": 164, "R": 1.617198787, "exp_thr": 5.0, "exp_bin": false, "source": "KC2023", "note": "CL1- (mv)", "mw": null, "orig_ambiguous": false, "orig_multi_value": true, "og_uid": "O14980;A0A7I2V461;A0A7I2V2Y6;A0A7I2YQV4;A0A7I2V3P3;A0A7I2V2S3;A0A7I2V3W6;A0A7I2V3N0;A0A7I2V6B9;A0A7I2YQX3;A0A7I2V4A3;C9JKM9", "sequence": "MPAIMTMLADHAARQLLDFSQKLDINLLDNVVNCLYHGEGAQQRMAQEVLTHLKEHPDA…
	{"uid": "A0A7I2V4A3", "roi": 528, "R": 0.415214458, "exp_thr": 5.0, "exp_bin": false, "source": "KC2023", "note": "CL1- (mv)", "mw": null, "orig_ambiguous": false, "orig_multi_value": true, "og_uid": "O14980;A0A7I2V461;A0A7I2V2Y6;A0A7I2YQV4;A0A7I2V3P3;A0A7I2V2H0;A0A7I2V2S3;A0A7I2V3W6;A0A7I2V3N0;A0A7I2V6B9;A0A7I2YQX3;A0A7I2V4A3;A0A7I2V488", "sequence": "MPAIMTMLADHAARQLLDFSQKLDINLLDNVVNCLYHGEGAQQR…
	{"uid": "A0A7I2V4A3", "roi": 119, "R": 0.0, "exp_thr": 5.0, "exp_bin": false, "source": "KC2023", "note": "CL1- (mv)", "mw": null, "orig_ambiguous": false, "orig_multi_value": true, "og_uid": "O14980;A0A7I2V2Y6;A0A7I2YQV4;A0A7I2V3P3;A0A7I2V2S3;A0A7I2V3W6;A0A7I2V3N0;A0A7I2YQX3;A0A7I2V4A3;C9JKM9;C9J673", "sequence": "MPAIMTMLADHAARQLLDFSQKLDINLLDNVVNCLYHGEGAQQRMAQEVLTHLKEHPDAWTRVDTILEFSQNMNTKYYGLQI…
	{"uid": "C9JKM9", "roi": 164, "R": 1.617198787, "exp_thr": 5.0, "exp_bin": false, "source": "KC2023", "note": "CL1- (mv)", "mw": null, "orig_ambiguous": false, "orig_multi_value": true, "og_uid": "O14980;A0A7I2V461;A0A7I2V2Y6;A0A7I2YQV4;A0A7I2V3P3;A0A7I2V2S3;A0A7I2V3W6;A0A7I2V3N0;A0A7I2V6B9;A0A7I2YQX3;A0A7I2V4A3;C9JKM9", "sequence": "MPAIMTMLADHAARQLLDFSQKLDINLLDNVVNCLYHGEGAQQRMAQEVLTHLKEHPDAWTRV…
	{"uid": "C9JKM9", "roi": 119, "R": 0.0, "exp_thr": 5.0, "exp_bin": false, "source": "KC2023", "note": "CL1- (mv)", "mw": null, "orig_ambiguous": false, "orig_multi_value": true, "og_uid": "O14980;A0A7I2V2Y6;A0A7I2YQV4;A0A7I2V3P3;A0A7I2V2S3;A0A7I2V3W6;A0A7I2V3N0;A0A7I2YQX3;A0A7I2V4A3;C9JKM9;C9J673", "sequence": "MPAIMTMLADHAARQLLDFSQKLDINLLDNVVNCLYHGEGAQQRMAQEVLTHLKEHPDAWTRVDTILEFSQNMNTKYYGLQILENV…
	{"uid": "G3V5R9", "roi": 236, "R": 1.584703004, "exp_thr": 5.0, "exp_bin": false, "source": "KC2023", "note": "CL1- (mv)", "mw": null, "orig_ambiguous": false, "orig_multi_value": true, "og_uid": "Q9H0B6;A8MZ87;A8MX29;E9PQ02;G3V5R9;G3V3H3;G3V2E7;F8W6L3;E7EVH7;Q07866;G5E9S8;Q9NSK0;C9J8T5;C9JZE5", "sequence": "MYDNMSTMVYIKEDKLEKLTQDEIISKTKQVIQGLEALKNEHNSILQSLLETLKCLKKDDESNLVEEKSNMIRKSLEMLELGLSEAQVM…
	{"uid": "G3V3H3", "roi": 236, "R": 1.584703004, "exp_thr": 5.0, "exp_bin": false, "source": "KC2023", "note": "CL1- (mv)", "mw": null, "orig_ambiguous": false, "orig_multi_value": true, "og_uid": "Q9H0B6;A8MZ87;A8MX29;E9PQ02;G3V5R9;G3V3H3;G3V2E7;F8W6L3;E7EVH7;Q07866;G5E9S8;Q9NSK0;C9J8T5;C9JZE5", "sequence": "MYDNMSTMVYIKEDKLEKLTQDEIISKTKQVIQGLEALKNEHNSILQSLLETLKCLKKDDESNLVEEKSNMIRKSLEMLELGLSEAQVM…
	{"uid": "G3V2E7", "roi": 236, "R": 1.584703004, "exp_thr": 5.0, "exp_bin": false, "source": "KC2023", "note": "CL1- (mv)", "mw": null, "orig_ambiguous": false, "orig_multi_value": true, "og_uid": "Q9H0B6;A8MZ87;A8MX29;E9PQ02;G3V5R9;G3V3H3;G3V2E7;F8W6L3;E7EVH7;Q07866;G5E9S8;Q9NSK0;C9J8T5;C9JZE5", "sequence": "MYDNMSTMVYIKEDKLEKLTQDEIISKTKQVIQGLEALKNEHNSILQSLLETLKCLKKDDESNLVEEKSNMIRKSLEMLELGLSEAQVM…
	{"uid": "F8W6L3", "roi": 236, "R": 1.584703004, "exp_thr": 5.0, "exp_bin": false, "source": "KC2023", "note": "CL1- (mv)", "mw": null, "orig_ambiguous": false, "orig_multi_value": true, "og_uid": "Q9H0B6;A8MZ87;A8MX29;E9PQ02;G3V5R9;G3V3H3;G3V2E7;F8W6L3;E7EVH7;Q07866;G5E9S8;Q9NSK0;C9J8T5;C9JZE5", "sequence": "MYDNMSTMVYIKEDKLEKLTQDEIISKTKQVIQGLEALKNEHNSILQSLLETLKCLKKDDESNLVEEKSNMIRKSLEMLELGLSEAQVM…
	{"uid": "G5E9S8", "roi": 236, "R": 1.584703004, "exp_thr": 5.0, "exp_bin": false, "source": "KC2023", "note": "CL1- (mv)", "mw": null, "orig_ambiguous": false, "orig_multi_value": true, "og_uid": "Q9H0B6;A8MZ87;A8MX29;E9PQ02;G3V5R9;G3V3H3;G3V2E7;F8W6L3;E7EVH7;Q07866;G5E9S8;Q9NSK0;C9J8T5;C9JZE5", "sequence": "MYDNMSTMVYIKEDKLEKLTQDEIISKTKQVIQGLEALKNEHNSILQSLLETLKCLKKDDESNLVEEKSNMIRKSLEMLELGLSEAQVM…
	{"uid": "M0R3F6", "roi": 656, "R": 1.565725096, "exp_thr": 5.0, "exp_bin": false, "source": "KC2023", "note": "CL1- (mv)", "mw": null, "orig_ambiguous": false, "orig_multi_value": true, "og_uid": "M0R3F6;M0R2Z9;Q8IX01", "sequence": "MAARRITQETFDAVLQEKAKRYHMDASGEAVSETLQFKAQDLLRAVPRSRAEMYDDVHSDGRYSLSGSVAHSRDAGREGLRSDVFPGPSFRSSNPSISDDSYFRKECGRDLEFSHSDSRDQVIGHRKLGHFRSQDWKFALRGSWEQDFGHPVSQESSWSQEYSFGP…
	{"uid": "A0A7I2V2U2", "roi": 153, "R": 1.565054037, "exp_thr": 5.0, "exp_bin": false, "source": "KC2023", "note": "CL1- (mv)", "mw": null, "orig_ambiguous": false, "orig_multi_value": true, "og_uid": "A0A7I2V4T9;A0A7I2V2U2;A0A7I2V5Z3;A0A7I2V588;O43765;A0A7I2V697;K7EMD6", "sequence": "MDNKKRLAYAIIQFLHDQLRHGGLSSDAQESLEVAIQCLETAFGVTVEDSDLALPQTLPEIFEAAATGKEMPQDLRSPARTPPSEEDSAEAERLKTEGNEQMKVENFEAAVHFY…
	{"uid": "A0A7I2V5Z3", "roi": 153, "R": 1.565054037, "exp_thr": 5.0, "exp_bin": false, "source": "KC2023", "note": "CL1- (mv)", "mw": null, "orig_ambiguous": false, "orig_multi_value": true, "og_uid": "A0A7I2V4T9;A0A7I2V2U2;A0A7I2V5Z3;A0A7I2V588;O43765;A0A7I2V697;K7EMD6", "sequence": "MDNKKRLAYAIIQFLHDQLRHGGLSSDAQESLEVAIQCLETAFGVTVEDSDLALPQTLPEIFEAAATGKEMPQDLRSPARTPPSEEDSAEAERLKTEGNEQMKVENFEAAVHFY…
	{"uid": "A0A7I2V588", "roi": 153, "R": 1.565054037, "exp_thr": 5.0, "exp_bin": false, "source": "KC2023", "note": "CL1- (mv)", "mw": null, "orig_ambiguous": false, "orig_multi_value": true, "og_uid": "A0A7I2V4T9;A0A7I2V2U2;A0A7I2V5Z3;A0A7I2V588;O43765;A0A7I2V697;K7EMD6", "sequence": "MDNKKRLAYAIIQFLHDQLRHGGLSSDAQESLEVAIQCLETAFGVTVEDSDLALPQTLPEIFEAAATGKEMPQDLRSPARTPPSEEDSAEAERLKTEGNEQMKVENFEAAVHFY…
	{"uid": "A0A7I2V588", "roi": 153, "R": 1.565054037, "exp_thr": 5.0, "exp_bin": false, "source": "KC2023", "note": "CL1- (mv)", "mw": null, "orig_ambiguous": false, "orig_multi_value": true, "og_uid": "A0A7I2V4T9;A0A7I2V2U2;A0A7I2V5Z3;A0A7I2V588;O43765;A0A7I2V697;K7EMD6", "sequence": "MDNKKRLAYAIIQFLHDQLRHGGLSSDAQESLEVAIQCLETAFGVTVEDSDLALPQTLPEIFEAAATGKEMPQDLRSPARTPPSEEDSAEAERLKTEGNEQMKVENFEAAVHFY…
	{"uid": "F6VRR5", "roi": 355, "R": 1.552033855, "exp_thr": 5.0, "exp_bin": false, "source": "KC2023", "note": "CL1- (mv)", "mw": null, "orig_ambiguous": false, "orig_multi_value": true, "og_uid": "F6VRR5;Q9BY77", "sequence": "MADISLDELIRKRGAAAKGRLNARPGVGGVRSRVGIQQGLLSQSTRTATFQQRFDARQKIGLSDARLKLGVKDAREKLLQKDARFRIKGKVQDAREMLNSRKQQTTVPQKPRQVADAREKISLKRSSPAAFINPPIGTVTPALKLTKTIQRMHVDPVGWILTTECFQVPQQKA…
	{"uid": "J3KS54", "roi": 46, "R": 1.548513044, "exp_thr": 5.0, "exp_bin": false, "source": "KC2023", "note": "CL1- (mv)", "mw": null, "orig_ambiguous": false, "orig_multi_value": true, "og_uid": "Q13045;J3KS54;K7EP37;K7EP27", "sequence": "MEATGVLPFVRGVDLSGNDFKGGYFPENVKAMTSLRWLKLNRTGLCYLPEELAALQKLEHLSVSHNNLTTLHGELSSLPSLRAIVARANSLKNSGVPDDIFKLDDLSVLDLSHNQLTECPRELENAKNMLVLNLSHNSIDTIPNQLFINLTDLLYLDLSE…
	{"uid": "J3KS54", "roi": 289, "R": 0.0, "exp_thr": 5.0, "exp_bin": false, "source": "KC2023", "note": "CL1- (mv)", "mw": null, "orig_ambiguous": false, "orig_multi_value": true, "og_uid": "Q13045;J3KS54;J3QQQ2", "sequence": "MEATGVLPFVRGVDLSGNDFKGGYFPENVKAMTSLRWLKLNRTGLCYLPEELAALQKLEHLSVSHNNLTTLHGELSSLPSLRAIVARANSLKNSGVPDDIFKLDDLSVLDLSHNQLTECPRELENAKNMLVLNLSHNSIDTIPNQLFINLTDLLYLDLSENRLESLPPQMRRLV…
	{"uid": "A0A6I8PL42", "roi": 508, "R": 1.54354489, "exp_thr": 5.0, "exp_bin": false, "source": "KC2023", "note": "CL1- (mv)", "mw": null, "orig_ambiguous": false, "orig_multi_value": true, "og_uid": "A0A6I8PL42;B4DER1;A0A6I8PIV1;Q9P2J5;A0A6I8PS05;A0A6I8PRS0;A0A6I8PIT3;A0A6I8PLB3;A0A6I8PLB8;A0A6I8PIP7;A0A6I8PTV8", "sequence": "MAERKGTAKVDFLKKIEKEIQQKWDTERVFEVNASNLEKQTSKGKYFVTFPYPYMNGRLHLGHTFSLSKCE…
	{"uid": "A0A6I8PL42", "roi": 508, "R": 0.0, "exp_thr": 5.0, "exp_bin": false, "source": "KC2023", "note": "CL1- (mv)", "mw": null, "orig_ambiguous": false, "orig_multi_value": true, "og_uid": "A0A6I8PL42;B4DER1;A0A6I8PIV1;Q9P2J5;A0A6I8PS05;A0A6I8PRS0;A0A6I8PIT3;A0A6I8PLB3;A0A6I8PLB8;A0A6I8PIP7;A0A6I8PTV8", "sequence": "MAERKGTAKVDFLKKIEKEIQQKWDTERVFEVNASNLEKQTSKGKYFVTFPYPYMNGRLHLGHTFSLSKCEFAVGYQR…
	{"uid": "H3BNC9", "roi": 484, "R": 1.520405327, "exp_thr": 5.0, "exp_bin": false, "source": "KC2023", "note": "CL1- (mv)", "mw": null, "orig_ambiguous": false, "orig_multi_value": true, "og_uid": "H3BNC9;P08708;H0YN88;A0A075B716;H0YN73", "sequence": "MLFPTSAQESSRGLPDANDLCLGLQSLSLTGWDRPWSTQDSDSSAQSSTHSVLSMLHNPLGNVLGKPPLSFLPLDPLGSDLVDKFPAPSVRGSRLDTRPILDSRSSSPSDSDTSGFSSGSDHLSDLISSLRISPPLPFLSLSGGGPRD…
	{"uid": "H3BNC9", "roi": 484, "R": 0.941917445, "exp_thr": 5.0, "exp_bin": false, "source": "KC2023", "note": "CL1- (mv)", "mw": null, "orig_ambiguous": false, "orig_multi_value": true, "og_uid": "H3BNC9;P08708;H0YN88;A0A075B716;H0YN73", "sequence": "MLFPTSAQESSRGLPDANDLCLGLQSLSLTGWDRPWSTQDSDSSAQSSTHSVLSMLHNPLGNVLGKPPLSFLPLDPLGSDLVDKFPAPSVRGSRLDTRPILDSRSSSPSDSDTSGFSSGSDHLSDLISSLRISPPLPFLSLSGGGPRD…
	{"uid": "D6RFG8", "roi": 45, "R": 1.517499261, "exp_thr": 5.0, "exp_bin": false, "source": "KC2023", "note": "CL1- (mv)", "mw": null, "orig_ambiguous": false, "orig_multi_value": true, "og_uid": "D6RFG8;P27707;D6RCP9", "sequence": "MATPPKRSCPSFSASSEGTRIKKISIEGNIAAGKSTFVNILKQLCEDWEVVPEPVARWCNVQSTQDEFEELTMSQKNGGNVLQMMYEKPERWSFTFQTYACLSRIRAQLASLNGKLKDAEKPVLFFERSVYSDRYIFASNLYESECMNETEWTIYQDWHDWMNNQFG…
	{"uid": "D6RCP9", "roi": 45, "R": 1.517499261, "exp_thr": 5.0, "exp_bin": false, "source": "KC2023", "note": "CL1- (mv)", "mw": null, "orig_ambiguous": false, "orig_multi_value": true, "og_uid": "D6RFG8;P27707;D6RCP9", "sequence": "MATPPKRSCPSFSASSEGTRIKKISIEGNIAAGKSTFVNILKQLCEDWEVVPEPVARWCNVQSTQDEFEELTMSQKNGGNVLQMMYEKPERWSFTFQTYACLSRIRAQLASLNGKLKDAEKPVLFFERSVYSDRYIFASNLYESECMNETEWTIYQDWHDWMNNQFG…
	{"uid": "J3QRV5", "roi": 933, "R": 1.490781497, "exp_thr": 5.0, "exp_bin": false, "source": "KC2023", "note": "CL1- (mv)", "mw": null, "orig_ambiguous": false, "orig_multi_value": true, "og_uid": "J3QRV5;Q6P1M3", "sequence": "MRRFLRPGHDPVRERLKRDLFQFNKTVEHGFPHQPSALGYSPSLRILAIGTRSGAIKLYGAPGVEFMGLHQENNAVTQIHLLPGQCQLVTLLDDNSLHLWSLKVKGGASELQEDESFTLRGPPGAAPSATQITVVLPHSSCELLYLGTESGNVFVVQLPAFRALEDRTISSDA…
	{"uid": "E5RJR5", "roi": 160, "R": 1.487331982, "exp_thr": 5.0, "exp_bin": false, "source": "KC2023", "note": "CL1- (mv)", "mw": null, "orig_ambiguous": false, "orig_multi_value": true, "og_uid": "P63208;E5RJR5", "sequence": "MPSIKLQSSDGEIFEVDVEIAKQSVTIKTMLEDLGMDDEGDDDPVPLPNVNAAILKKVIQWCTHHKDDPPPPEDDENKEKRTDDIPVWDQEFLKYTLRKTTVSLQAANYLDIKGLLDVTCKTVANMIKGKTPEEIRKTFNIKNDFTEEEEAQVRKENQWCEEK", "mapped…
	{"uid": "E5RJR5", "roi": 160, "R": 0.97247599, "exp_thr": 5.0, "exp_bin": false, "source": "KC2023", "note": "CL1- (mv)", "mw": null, "orig_ambiguous": false, "orig_multi_value": true, "og_uid": "P63208;E5RJR5", "sequence": "MPSIKLQSSDGEIFEVDVEIAKQSVTIKTMLEDLGMDDEGDDDPVPLPNVNAAILKKVIQWCTHHKDDPPPPEDDENKEKRTDDIPVWDQEFLKYTLRKTTVSLQAANYLDIKGLLDVTCKTVANMIKGKTPEEIRKTFNIKNDFTEEEEAQVRKENQWCEEK", "mapped_…
	{"uid": "E5RJR5", "roi": 120, "R": 0.785673042, "exp_thr": 5.0, "exp_bin": false, "source": "KC2023", "note": "CL1- (mv)", "mw": null, "orig_ambiguous": false, "orig_multi_value": true, "og_uid": "P63208;E5RJR5;E7ERH2;F8W8N3", "sequence": "MPSIKLQSSDGEIFEVDVEIAKQSVTIKTMLEDLGMDDEGDDDPVPLPNVNAAILKKVIQWCTHHKDDPPPPEDDENKEKRTDDIPVWDQEFLKYTLRKTTVSLQAANYLDIKGLLDVTCKTVANMIKGKTPEEIRKTFNIKNDFTEEEEAQVRKENQW…
	{"uid": "A0A087WVD1", "roi": 293, "R": 1.481790951, "exp_thr": 5.0, "exp_bin": false, "source": "KC2023", "note": "CL1- (mv)", "mw": null, "orig_ambiguous": false, "orig_multi_value": true, "og_uid": "A0A087WVD1;Q96B70", "sequence": "MAAAREPELPQEAPATEPAPPPACRFFLEGRCRFGARCRQPHPGAPAPPGREAQPEAGAKKPPLRTAADVIQRIRWDPRLDPADFSVGYVDRFLGVREEPFSAFCWDQPLAALGPGVLAVPQHRVRFFRFRGRLVWDRASRTDLVFGSGSAAGRGPTILDAPNTE…
	{"uid": "A0A2R8Y5Q8", "roi": 371, "R": 1.452120057, "exp_thr": 5.0, "exp_bin": false, "source": "KC2023", "note": "CL1- (mv)", "mw": null, "orig_ambiguous": false, "orig_multi_value": true, "og_uid": "Q15813;A0A2R8Y5Q8;A0A2R8YHI9;A0A2U3TZJ6;A0A2R8Y7E7;A0A2R8Y6Q1", "sequence": "MSDTLTADVIGRRVEVNGEHATVRFAGVVPPVAGPWLGVEWDNPERGKHDGSHEGTVYFKCRHPTGGSFIRPNKVNFGTDFLTAIKNRYVLEDGPEEDRKEQIVTIGNKPVETIGFDSIMK…
	{"uid": "A0A2R8YHI9", "roi": 371, "R": 1.452120057, "exp_thr": 5.0, "exp_bin": false, "source": "KC2023", "note": "CL1- (mv)", "mw": null, "orig_ambiguous": false, "orig_multi_value": true, "og_uid": "Q15813;A0A2R8Y5Q8;A0A2R8YHI9;A0A2U3TZJ6;A0A2R8Y7E7;A0A2R8Y6Q1", "sequence": "MSDTLTADVIGRRVEVNGEHATVRFAGVVPPVAGPWLGVEWDNPERGKHDGSHEGTVYFKCRHPTGGSFIRPNKVNFGTDFLTAIKNRYVLEDGPEEDRKEQIVTIGNKPVETIGFDSIMK…
	{"uid": "K7EN98", "roi": 12, "R": 1.421965318, "exp_thr": 5.0, "exp_bin": false, "source": "KC2023", "note": "CL1- (mv)", "mw": null, "orig_ambiguous": false, "orig_multi_value": true, "og_uid": "Q9BUF5;K7ESM5;K7EL29;K7EN98;K7ESQ3;K7EQT3;K7EJ64;K7ERA8;K7EJZ4;K7EPE5", "sequence": "MREIVHIQAGQCGNQIGTKFWEVISDEHGIDPAGGYVGDSALQLERINVYYNESSSQKYVPRAALVDLEPGTMDSVRSGPFGQLFRPDNFIFGQTGAGNNWAKGASSSRTRWAAARAQ…
	{"uid": "K7ESQ3", "roi": 12, "R": 1.421965318, "exp_thr": 5.0, "exp_bin": false, "source": "KC2023", "note": "CL1- (mv)", "mw": null, "orig_ambiguous": false, "orig_multi_value": true, "og_uid": "Q9BUF5;K7ESM5;K7EL29;K7EN98;K7ESQ3;K7EQT3;K7EJ64;K7ERA8;K7EJZ4;K7EPE5", "sequence": "MREIVHIQAGQCGNQIGTKFWEVISDEHGIDPAGGYVGDSALQLERINVYYNESSSQKYVPRAALVDLEPGTMDSVRSGPFGQLFRPDNFIFELPL", "mapped_roi": 12, "…
	{"uid": "K7EQT3", "roi": 12, "R": 1.421965318, "exp_thr": 5.0, "exp_bin": false, "source": "KC2023", "note": "CL1- (mv)", "mw": null, "orig_ambiguous": false, "orig_multi_value": true, "og_uid": "Q9BUF5;K7ESM5;K7EL29;K7EN98;K7ESQ3;K7EQT3;K7EJ64;K7ERA8;K7EJZ4;K7EPE5", "sequence": "MREIVHIQAGQCGNQIGTKFWEVISDEHGIDPAGGYVGDSALQLERINVYYNESSSQKYVPRAALVDLEPGTMDSVRSGPFGQLFRPDNFIFAHHGITSHPPCR", "mapped_roi…
	{"uid": "K7EJ64", "roi": 12, "R": 1.421965318, "exp_thr": 5.0, "exp_bin": false, "source": "KC2023", "note": "CL1- (mv)", "mw": null, "orig_ambiguous": false, "orig_multi_value": true, "og_uid": "Q9BUF5;K7ESM5;K7EL29;K7EN98;K7ESQ3;K7EQT3;K7EJ64;K7ERA8;K7EJZ4;K7EPE5", "sequence": "MREIVHIQAGQCGNQIGTKFWEVISDEHGIDPAGGYVGDSALQLERINVYYNESSSQKYVPRAALVDLEPGTMDSVRSGPFGQLFRPDNFIFAHLHRGTEEKQE", "mapped_roi…
	{"uid": "K7ERA8", "roi": 12, "R": 1.421965318, "exp_thr": 5.0, "exp_bin": false, "source": "KC2023", "note": "CL1- (mv)", "mw": null, "orig_ambiguous": false, "orig_multi_value": true, "og_uid": "Q9BUF5;K7ESM5;K7EL29;K7EN98;K7ESQ3;K7EQT3;K7EJ64;K7ERA8;K7EJZ4;K7EPE5", "sequence": "MREIVHIQAGQCGNQIGTKFWEVISDEHGIDPAGGYVGDSALQLERINVYYNESSSQKYVPRAALVDLEPGTMDSVRSGPFGQLFRPDNFIFATYFEDLSISQVWLPHSC", "mapp…
	{"uid": "K7EJZ4", "roi": 12, "R": 1.421965318, "exp_thr": 5.0, "exp_bin": false, "source": "KC2023", "note": "CL1- (mv)", "mw": null, "orig_ambiguous": false, "orig_multi_value": true, "og_uid": "Q9BUF5;K7ESM5;K7EL29;K7EN98;K7ESQ3;K7EQT3;K7EJ64;K7ERA8;K7EJZ4;K7EPE5", "sequence": "MREIVHIQAGQCGNQIGTKFWEVISDEHGIDPAGGYVGDSALQLERINVYYNESSSQKYVPRAALVDLEPGTMDSVRSGPFGQLFRPDNFIFVTFLRATGAGTVSTSAHHIATPA", …
	{"uid": "K7EPE5", "roi": 12, "R": 1.421965318, "exp_thr": 5.0, "exp_bin": false, "source": "KC2023", "note": "CL1- (mv)", "mw": null, "orig_ambiguous": false, "orig_multi_value": true, "og_uid": "Q9BUF5;K7ESM5;K7EL29;K7EN98;K7ESQ3;K7EQT3;K7EJ64;K7ERA8;K7EJZ4;K7EPE5", "sequence": "MREIVHIQAGQCGNQIGTKFWEVISDEHGIDPAGGYVGDSALQLERINVYYNESSSQKYVPRAALVDLEPGTMDSVRSGPFGQLFRPDNFIFGMFRQTHIFTHIQWSQLYTLFSTLVF…
	{"uid": "E9PPV6", "roi": 156, "R": 1.419936883, "exp_thr": 5.0, "exp_bin": false, "source": "KC2023", "note": "CL1- (mv)", "mw": null, "orig_ambiguous": false, "orig_multi_value": true, "og_uid": "P50454;E9PJH8;E9PPV6;E9PR70;E9PK86;E9PMI5;E9PNX1;E9PIG2;E9PRS3;E9PQ34", "sequence": "MRSLLLLSAFCLLEAALAAEVKKPAAAAAPGTAEKLSPKAATLAERSAGLAFSLYQAMAKDQAVENILVSPVVVASSLGLVSLGGKATTASQAKAVLSAEQLRDEEVHAGLGELLRS…
	{"uid": "A0A7I2V2X6", "roi": 205, "R": 1.416713935, "exp_thr": 5.0, "exp_bin": false, "source": "KC2023", "note": "CL1- (mv)", "mw": null, "orig_ambiguous": false, "orig_multi_value": true, "og_uid": "A0A7I2V2X6;P10809;A0A7I2V599;A0A7I2YQK6;A0A7I2V5M1;A0A7I2V5K3;A0A7I2YQ71;A0A7I2V369", "sequence": "MLRLPTVFRQMRPVSRVLAPHLTRAYAKDVKFGADARALMLQGVDLLADAVAVTMGPKGRTVIIEQSWGSPKVTKDGVTVAKSIDLKDKYKNIGAKLVQ…
	{"uid": "A0A7I2V2X6", "roi": 410, "R": 0.900967133, "exp_thr": 5.0, "exp_bin": false, "source": "KC2023", "note": "CL1- (mv)", "mw": null, "orig_ambiguous": false, "orig_multi_value": true, "og_uid": "A0A7I2V2X6;P10809;A0A7I2V599;A0A7I2YQK6", "sequence": "MLRLPTVFRQMRPVSRVLAPHLTRAYAKDVKFGADARALMLQGVDLLADAVAVTMGPKGRTVIIEQSWGSPKVTKDGVTVAKSIDLKDKYKNIGAKLVQDVANNTNEEAGDGTTTATVLARSIAKEGFEKISKGANPVEIRRG…
	{"uid": "A0A7I2V2X6", "roi": 415, "R": 0.715445168, "exp_thr": 5.0, "exp_bin": false, "source": "KC2023", "note": "CL1- (mv)", "mw": null, "orig_ambiguous": false, "orig_multi_value": true, "og_uid": "A0A7I2V2X6;P10809;A0A7I2V599;A0A7I2YQK6", "sequence": "MLRLPTVFRQMRPVSRVLAPHLTRAYAKDVKFGADARALMLQGVDLLADAVAVTMGPKGRTVIIEQSWGSPKVTKDGVTVAKSIDLKDKYKNIGAKLVQDVANNTNEEAGDGTTTATVLARSIAKEGFEKISKGANPVEIRRG…
	{"uid": "E9PMA9", "roi": 45, "R": 1.413085594, "exp_thr": 5.0, "exp_bin": false, "source": "KC2023", "note": "CL1- (mv)", "mw": null, "orig_ambiguous": false, "orig_multi_value": true, "og_uid": "P13489;E9PMJ3;E9PLZ3;E9PIM9;E9PMA9;E9PMN0;E9PIK5", "sequence": "MSLDIQSLDIQCEELSDARWAELLPLLQQCQVVRLDDCGLTEARCKDISSALRVNPALAELNLRSNELGDVGCPTAV", "mapped_roi": 45, "window_seq": "LDDCGLTEARCKDISSALRVN"}
	{"uid": "E9PMA9", "roi": 12, "R": 1.13897286, "exp_thr": 5.0, "exp_bin": false, "source": "KC2023", "note": "CL1- (mv)", "mw": null, "orig_ambiguous": false, "orig_multi_value": true, "og_uid": "P13489;E9PMJ3;E9PLZ3;E9PIM9;E9PMA9;E9PMN0;E9PIK5;E9PR82;E9PMI1", "sequence": "MSLDIQSLDIQCEELSDARWAELLPLLQQCQVVRLDDCGLTEARCKDISSALRVNPALAELNLRSNELGDVGCPTAV", "mapped_roi": 12, "window_seq": "SLDIQSLDIQCEE…
	{"uid": "E9PMA9", "roi": 38, "R": 0.935773546, "exp_thr": 5.0, "exp_bin": false, "source": "KC2023", "note": "CL1- (mv)", "mw": null, "orig_ambiguous": false, "orig_multi_value": true, "og_uid": "P13489;E9PMJ3;E9PLZ3;E9PIM9;E9PMA9;E9PMN0;E9PIK5", "sequence": "MSLDIQSLDIQCEELSDARWAELLPLLQQCQVVRLDDCGLTEARCKDISSALRVNPALAELNLRSNELGDVGCPTAV", "mapped_roi": 38, "window_seq": "QQCQVVRLDDCGLTEARCKDI"}
	{"uid": "E9PIK5", "roi": 45, "R": 1.413085594, "exp_thr": 5.0, "exp_bin": false, "source": "KC2023", "note": "CL1- (mv)", "mw": null, "orig_ambiguous": false, "orig_multi_value": true, "og_uid": "P13489;E9PMJ3;E9PLZ3;E9PIM9;E9PMA9;E9PMN0;E9PIK5", "sequence": "MSLDIQSLDIQCEELSDARWAELLPLLQQCQVVRLDDCGLTEARCKDISSALRVNPALAELNLRSNELGDVGVHCVLQGLQTPSCKIQKLSLQNCCLTGAGCGVLSSTLRTLPTLQELHLSDNLLGDAGLQLLCEGLLD…
	{"uid": "E9PIK5", "roi": 12, "R": 1.13897286, "exp_thr": 5.0, "exp_bin": false, "source": "KC2023", "note": "CL1- (mv)", "mw": null, "orig_ambiguous": false, "orig_multi_value": true, "og_uid": "P13489;E9PMJ3;E9PLZ3;E9PIM9;E9PMA9;E9PMN0;E9PIK5;E9PR82;E9PMI1", "sequence": "MSLDIQSLDIQCEELSDARWAELLPLLQQCQVVRLDDCGLTEARCKDISSALRVNPALAELNLRSNELGDVGVHCVLQGLQTPSCKIQKLSLQNCCLTGAGCGVLSSTLRTLPTLQELHLSDNLLG…
	{"uid": "E9PIK5", "roi": 38, "R": 0.935773546, "exp_thr": 5.0, "exp_bin": false, "source": "KC2023", "note": "CL1- (mv)", "mw": null, "orig_ambiguous": false, "orig_multi_value": true, "og_uid": "P13489;E9PMJ3;E9PLZ3;E9PIM9;E9PMA9;E9PMN0;E9PIK5", "sequence": "MSLDIQSLDIQCEELSDARWAELLPLLQQCQVVRLDDCGLTEARCKDISSALRVNPALAELNLRSNELGDVGVHCVLQGLQTPSCKIQKLSLQNCCLTGAGCGVLSSTLRTLPTLQELHLSDNLLGDAGLQLLCEGLLD…
	{"uid": "A0A7I2V490", "roi": 62, "R": 1.392823593, "exp_thr": 5.0, "exp_bin": false, "source": "KC2023", "note": "CL1- (mv)", "mw": null, "orig_ambiguous": false, "orig_multi_value": true, "og_uid": "P26358;A0A7I2V490;A0A7I2V5D0;A0A7I2YQQ0;A0A7I2V5F1;A0A7I2YQA8;A0A7I2V5F6;A0A7I2V2G5;K7EJL0;A0A7I2V3F8;K7EMU8", "sequence": "MPARTAPARVPTLAVPAISLPDDVRRRLKDLERDSLTEKECVKEKLNLLHEFLQTEIKNQLCDLETKLRKEELSE…
	{"uid": "A0A7I2V490", "roi": 1125, "R": 0.975026638, "exp_thr": 5.0, "exp_bin": false, "source": "KC2023", "note": "CL1- (mv)", "mw": null, "orig_ambiguous": false, "orig_multi_value": true, "og_uid": "P26358;A0A7I2V490;A0A7I2V5D0;A0A7I2YQQ0;A0A7I2V5F1;A0A7I2YQA8;A0A7I2V311", "sequence": "MPARTAPARVPTLAVPAISLPDDVRRRLKDLERDSLTEKECVKEKLNLLHEFLQTEIKNQLCDLETKLRKEELSEEGYLAKVKSLLNKDLSLENGAHAYNREVNGRLEN…
	{"uid": "A0A7I2V5D0", "roi": 62, "R": 1.392823593, "exp_thr": 5.0, "exp_bin": false, "source": "KC2023", "note": "CL1- (mv)", "mw": null, "orig_ambiguous": false, "orig_multi_value": true, "og_uid": "P26358;A0A7I2V490;A0A7I2V5D0;A0A7I2YQQ0;A0A7I2V5F1;A0A7I2YQA8;A0A7I2V5F6;A0A7I2V2G5;K7EJL0;A0A7I2V3F8;K7EMU8", "sequence": "MPARTAPARVPTLAVPAISLPDDVRRRLKDLERDSLTEKECVKEKLNLLHEFLQTEIKNQLCDLETKLRKEELSE…
	{"uid": "A0A7I2V5D0", "roi": 1125, "R": 0.975026638, "exp_thr": 5.0, "exp_bin": false, "source": "KC2023", "note": "CL1- (mv)", "mw": null, "orig_ambiguous": false, "orig_multi_value": true, "og_uid": "P26358;A0A7I2V490;A0A7I2V5D0;A0A7I2YQQ0;A0A7I2V5F1;A0A7I2YQA8;A0A7I2V311", "sequence": "MPARTAPARVPTLAVPAISLPDDVRRRLKDLERDSLTEKECVKEKLNLLHEFLQTEIKNQLCDLETKLRKEELSEEGYLAKVKSLLNKDLSLENGAHAYNREVNGRLEN…
	{"uid": "A0A7I2YQQ0", "roi": 62, "R": 1.392823593, "exp_thr": 5.0, "exp_bin": false, "source": "KC2023", "note": "CL1- (mv)", "mw": null, "orig_ambiguous": false, "orig_multi_value": true, "og_uid": "P26358;A0A7I2V490;A0A7I2V5D0;A0A7I2YQQ0;A0A7I2V5F1;A0A7I2YQA8;A0A7I2V5F6;A0A7I2V2G5;K7EJL0;A0A7I2V3F8;K7EMU8", "sequence": "MPARTAPARVPTLAVPAISLPDDVRRRLKDLERDSLTEKECVKEKLNLLHEFLQTEIKNQLCDLETKLRKEELSE…
	{"uid": "A0A7I2YQQ0", "roi": 1125, "R": 0.975026638, "exp_thr": 5.0, "exp_bin": false, "source": "KC2023", "note": "CL1- (mv)", "mw": null, "orig_ambiguous": false, "orig_multi_value": true, "og_uid": "P26358;A0A7I2V490;A0A7I2V5D0;A0A7I2YQQ0;A0A7I2V5F1;A0A7I2YQA8;A0A7I2V311", "sequence": "MPARTAPARVPTLAVPAISLPDDVRRRLKDLERDSLTEKECVKEKLNLLHEFLQTEIKNQLCDLETKLRKEELSEEGYLAKVKSLLNKDLSLENGAHAYNREVNGRLEN…
	{"uid": "A0A7I2V5F1", "roi": 62, "R": 1.392823593, "exp_thr": 5.0, "exp_bin": false, "source": "KC2023", "note": "CL1- (mv)", "mw": null, "orig_ambiguous": false, "orig_multi_value": true, "og_uid": "P26358;A0A7I2V490;A0A7I2V5D0;A0A7I2YQQ0;A0A7I2V5F1;A0A7I2YQA8;A0A7I2V5F6;A0A7I2V2G5;K7EJL0;A0A7I2V3F8;K7EMU8", "sequence": "MPARTAPARVPTLAVPAISLPDDVRRRLKDLERDSLTEKECVKEKLNLLHEFLQTEIKNQLCDLETKLRKEELSE…
	{"uid": "A0A7I2V5F1", "roi": 1125, "R": 0.975026638, "exp_thr": 5.0, "exp_bin": false, "source": "KC2023", "note": "CL1- (mv)", "mw": null, "orig_ambiguous": false, "orig_multi_value": true, "og_uid": "P26358;A0A7I2V490;A0A7I2V5D0;A0A7I2YQQ0;A0A7I2V5F1;A0A7I2YQA8;A0A7I2V311", "sequence": "MPARTAPARVPTLAVPAISLPDDVRRRLKDLERDSLTEKECVKEKLNLLHEFLQTEIKNQLCDLETKLRKEELSEEGYLAKVKSLLNKDLSLENGAHAYNREVNGRLEN…
	{"uid": "A0A7I2YQA8", "roi": 62, "R": 1.392823593, "exp_thr": 5.0, "exp_bin": false, "source": "KC2023", "note": "CL1- (mv)", "mw": null, "orig_ambiguous": false, "orig_multi_value": true, "og_uid": "P26358;A0A7I2V490;A0A7I2V5D0;A0A7I2YQQ0;A0A7I2V5F1;A0A7I2YQA8;A0A7I2V5F6;A0A7I2V2G5;K7EJL0;A0A7I2V3F8;K7EMU8", "sequence": "MPARTAPARVPTLAVPAISLPDDVRRRLKDLERDSLTEKECVKEKLNLLHEFLQTEIKNQLCDLETKLRKEELSE…
	{"uid": "A0A7I2YQA8", "roi": 1125, "R": 0.975026638, "exp_thr": 5.0, "exp_bin": false, "source": "KC2023", "note": "CL1- (mv)", "mw": null, "orig_ambiguous": false, "orig_multi_value": true, "og_uid": "P26358;A0A7I2V490;A0A7I2V5D0;A0A7I2YQQ0;A0A7I2V5F1;A0A7I2YQA8;A0A7I2V311", "sequence": "MPARTAPARVPTLAVPAISLPDDVRRRLKDLERDSLTEKECVKEKLNLLHEFLQTEIKNQLCDLETKLRKEELSEEGYLAKVKSLLNKDLSLENGAHAYNREVNGRLEN…
	{"uid": "A0A7I2V5F6", "roi": 62, "R": 1.392823593, "exp_thr": 5.0, "exp_bin": false, "source": "KC2023", "note": "CL1- (mv)", "mw": null, "orig_ambiguous": false, "orig_multi_value": true, "og_uid": "P26358;A0A7I2V490;A0A7I2V5D0;A0A7I2YQQ0;A0A7I2V5F1;A0A7I2YQA8;A0A7I2V5F6;A0A7I2V2G5;K7EJL0;A0A7I2V3F8;K7EMU8", "sequence": "MPARTAPARVPTLAVPAISLPDDVRRRLKDLERDSLTEKECVKEKLNLLHEFLQTEIKNQLCDLETKLRKEELSE…
	{"uid": "A0A7I2V2G5", "roi": 62, "R": 1.392823593, "exp_thr": 5.0, "exp_bin": false, "source": "KC2023", "note": "CL1- (mv)", "mw": null, "orig_ambiguous": false, "orig_multi_value": true, "og_uid": "P26358;A0A7I2V490;A0A7I2V5D0;A0A7I2YQQ0;A0A7I2V5F1;A0A7I2YQA8;A0A7I2V5F6;A0A7I2V2G5;K7EJL0;A0A7I2V3F8;K7EMU8", "sequence": "MPARTAPARVPTLAVPAISLPDDVRRRLKDLERDSLTEKECVKEKLNLLHEFLQTEIKNQLCDLETKLRKEELSE…
	{"uid": "A0A7I2V3F8", "roi": 62, "R": 1.392823593, "exp_thr": 5.0, "exp_bin": false, "source": "KC2023", "note": "CL1- (mv)", "mw": null, "orig_ambiguous": false, "orig_multi_value": true, "og_uid": "P26358;A0A7I2V490;A0A7I2V5D0;A0A7I2YQQ0;A0A7I2V5F1;A0A7I2YQA8;A0A7I2V5F6;A0A7I2V2G5;K7EJL0;A0A7I2V3F8;K7EMU8", "sequence": "MPARTAPARVPTLAVPAISLPDDVRRRLKDLERDSLTEKECVKEKLNLLHEFLQTEIKNQLCDLETKLRKEELSE…
	{"uid": "K7EMU8", "roi": 62, "R": 1.392823593, "exp_thr": 5.0, "exp_bin": false, "source": "KC2023", "note": "CL1- (mv)", "mw": null, "orig_ambiguous": false, "orig_multi_value": true, "og_uid": "P26358;A0A7I2V490;A0A7I2V5D0;A0A7I2YQQ0;A0A7I2V5F1;A0A7I2YQA8;A0A7I2V5F6;A0A7I2V2G5;K7EJL0;A0A7I2V3F8;K7EMU8", "sequence": "MPARTAPARVPTLAVPAISLPDDVRRRLKDLERDSLTEKECVKEKLNLLHEFLQTEIKNQLCDLETKLRKEELSEICPW…
	{"uid": "F8VSD4", "roi": 87, "R": 1.388056516, "exp_thr": 5.0, "exp_bin": false, "source": "KC2023", "note": "CL1- (mv)", "mw": null, "orig_ambiguous": false, "orig_multi_value": true, "og_uid": "F8VQQ8;P61088;F8VSD4;F8VV71", "sequence": "MAGLPRRIIKETQRLLAEPVPGIKAEPDESNARYFHVVIAGPQDSPFEGGTFKLELFLPEEYPMAAPKVRFMTKIYHPNVDKLGRICLDILKARAWTRLYAMNNI", "mapped_roi": 87, "window_seq": "HPNVDKLGRICLDILKARA…
	{"uid": "F8VV71", "roi": 87, "R": 1.388056516, "exp_thr": 5.0, "exp_bin": false, "source": "KC2023", "note": "CL1- (mv)", "mw": null, "orig_ambiguous": false, "orig_multi_value": true, "og_uid": "F8VQQ8;P61088;F8VSD4;F8VV71", "sequence": "MAGLPRRIIKETQRLLAEPVPGIKAEPDESNARYFHVVIAGPQDSPFEGGTFKLELFLPEEYPMAAPKVRFMTKIYHPNVDKLGRICLDILKGKCYLYQHMLLLSFLLFLLSIPCLECKHYTKIREVCGREVKQFWACFFHALSYWACCLHR", "mapp…
	{"uid": "A0A6Q8PHG2", "roi": 971, "R": 1.386322616, "exp_thr": 5.0, "exp_bin": false, "source": "KC2023", "note": "CL1- (mv)", "mw": null, "orig_ambiguous": false, "orig_multi_value": true, "og_uid": "Q27J81;A0A6Q8PHA2;A0A6Q8PH71;A0A6Q8PHG2;A0A6Q8PGN3;A0A6Q8PF44;A0A6Q8PH25;A0A6Q8PF29;A0A6Q8PFW4;A0A6Q8PHS8;A0A0A0MQU1", "sequence": "MSVKEGAQRKWAALKEKLGPQDSDPTEANLESADPELCIRLLQMPSVVNYSGLRKRLEGSDGGWMV…
	{"uid": "A0A6Q8PHG2", "roi": 1029, "R": 1.101643828, "exp_thr": 5.0, "exp_bin": false, "source": "KC2023", "note": "CL1- (mv)", "mw": null, "orig_ambiguous": false, "orig_multi_value": true, "og_uid": "Q27J81;A0A6Q8PHA2;A0A6Q8PH71;A0A6Q8PHG2;A0A6Q8PGN3;A0A6Q8PH25;A0A6Q8PF29;A0A6Q8PFW4;A0A6Q8PHS8;A0A0A0MQU1", "sequence": "MSVKEGAQRKWAALKEKLGPQDSDPTEANLESADPELCIRLLQMPSVVNYSGLRKRLEGSDGGWMVQFLEQSGLDL…
	{"uid": "A0A6Q8PHG2", "roi": 332, "R": 0.711400708, "exp_thr": 5.0, "exp_bin": false, "source": "KC2023", "note": "CL1- (mv)", "mw": null, "orig_ambiguous": false, "orig_multi_value": true, "og_uid": "Q27J81;A0A6Q8PHA2;A0A6Q8PH71;A0A6Q8PHG2;A0A6Q8PGN3;A0A6Q8PF44;A0A6Q8PH25;A0A6Q8PF29;A0A6Q8PGC7;A0A087X118;A0A6Q8PH63;A0A6Q8PH59;A0A6Q8PGU8;A0A6Q8PFN5;A0A6Q8PFB9;A0A6Q8PGY8;A0A6Q8PH52", "sequence": "…
	{"uid": "A0A6Q8PF44", "roi": 971, "R": 1.386322616, "exp_thr": 5.0, "exp_bin": false, "source": "KC2023", "note": "CL1- (mv)", "mw": null, "orig_ambiguous": false, "orig_multi_value": true, "og_uid": "Q27J81;A0A6Q8PHA2;A0A6Q8PH71;A0A6Q8PHG2;A0A6Q8PGN3;A0A6Q8PF44;A0A6Q8PH25;A0A6Q8PF29;A0A6Q8PFW4;A0A6Q8PHS8;A0A0A0MQU1", "sequence": "MSVKEGAQRKWAALKEKLGPQDSDPTEANLESADPELCIRLLQMPSVVNYSGLRKRLEGSDGGWMV…
	{"uid": "A0A6Q8PF44", "roi": 332, "R": 0.711400708, "exp_thr": 5.0, "exp_bin": false, "source": "KC2023", "note": "CL1- (mv)", "mw": null, "orig_ambiguous": false, "orig_multi_value": true, "og_uid": "Q27J81;A0A6Q8PHA2;A0A6Q8PH71;A0A6Q8PHG2;A0A6Q8PGN3;A0A6Q8PF44;A0A6Q8PH25;A0A6Q8PF29;A0A6Q8PGC7;A0A087X118;A0A6Q8PH63;A0A6Q8PH59;A0A6Q8PGU8;A0A6Q8PFN5;A0A6Q8PFB9;A0A6Q8PGY8;A0A6Q8PH52", "sequence": "…
	{"uid": "A0A6Q8PH25", "roi": 971, "R": 1.386322616, "exp_thr": 5.0, "exp_bin": false, "source": "KC2023", "note": "CL1- (mv)", "mw": null, "orig_ambiguous": false, "orig_multi_value": true, "og_uid": "Q27J81;A0A6Q8PHA2;A0A6Q8PH71;A0A6Q8PHG2;A0A6Q8PGN3;A0A6Q8PF44;A0A6Q8PH25;A0A6Q8PF29;A0A6Q8PFW4;A0A6Q8PHS8;A0A0A0MQU1", "sequence": "MSVKEGAQRKWAALKEKLGPQDSDPTEANLESADPELCIRLLQMPSVVNYSGLRKRLEGSDGGWMV…
	{"uid": "A0A6Q8PH25", "roi": 1029, "R": 1.101643828, "exp_thr": 5.0, "exp_bin": false, "source": "KC2023", "note": "CL1- (mv)", "mw": null, "orig_ambiguous": false, "orig_multi_value": true, "og_uid": "Q27J81;A0A6Q8PHA2;A0A6Q8PH71;A0A6Q8PHG2;A0A6Q8PGN3;A0A6Q8PH25;A0A6Q8PF29;A0A6Q8PFW4;A0A6Q8PHS8;A0A0A0MQU1", "sequence": "MSVKEGAQRKWAALKEKLGPQDSDPTEANLESADPELCIRLLQMPSVVNYSGLRKRLEGSDGGWMVQFLEQSGLDL…
	{"uid": "A0A6Q8PH25", "roi": 332, "R": 0.711400708, "exp_thr": 5.0, "exp_bin": false, "source": "KC2023", "note": "CL1- (mv)", "mw": null, "orig_ambiguous": false, "orig_multi_value": true, "og_uid": "Q27J81;A0A6Q8PHA2;A0A6Q8PH71;A0A6Q8PHG2;A0A6Q8PGN3;A0A6Q8PF44;A0A6Q8PH25;A0A6Q8PF29;A0A6Q8PGC7;A0A087X118;A0A6Q8PH63;A0A6Q8PH59;A0A6Q8PGU8;A0A6Q8PFN5;A0A6Q8PFB9;A0A6Q8PGY8;A0A6Q8PH52", "sequence": "…
	{"uid": "A0A6Q8PF29", "roi": 971, "R": 1.386322616, "exp_thr": 5.0, "exp_bin": false, "source": "KC2023", "note": "CL1- (mv)", "mw": null, "orig_ambiguous": false, "orig_multi_value": true, "og_uid": "Q27J81;A0A6Q8PHA2;A0A6Q8PH71;A0A6Q8PHG2;A0A6Q8PGN3;A0A6Q8PF44;A0A6Q8PH25;A0A6Q8PF29;A0A6Q8PFW4;A0A6Q8PHS8;A0A0A0MQU1", "sequence": "MSVKEGAQRKWAALKEKLGPQDSDPTEANLESADPELCIRLLQMPSVVNYSGLRKRLEGSDGGWMV…
	{"uid": "A0A6Q8PF29", "roi": 1029, "R": 1.101643828, "exp_thr": 5.0, "exp_bin": false, "source": "KC2023", "note": "CL1- (mv)", "mw": null, "orig_ambiguous": false, "orig_multi_value": true, "og_uid": "Q27J81;A0A6Q8PHA2;A0A6Q8PH71;A0A6Q8PHG2;A0A6Q8PGN3;A0A6Q8PH25;A0A6Q8PF29;A0A6Q8PFW4;A0A6Q8PHS8;A0A0A0MQU1", "sequence": "MSVKEGAQRKWAALKEKLGPQDSDPTEANLESADPELCIRLLQMPSVVNYSGLRKRLEGSDGGWMVQFLEQSGLDL…
	{"uid": "A0A6Q8PF29", "roi": 332, "R": 0.711400708, "exp_thr": 5.0, "exp_bin": false, "source": "KC2023", "note": "CL1- (mv)", "mw": null, "orig_ambiguous": false, "orig_multi_value": true, "og_uid": "Q27J81;A0A6Q8PHA2;A0A6Q8PH71;A0A6Q8PHG2;A0A6Q8PGN3;A0A6Q8PF44;A0A6Q8PH25;A0A6Q8PF29;A0A6Q8PGC7;A0A087X118;A0A6Q8PH63;A0A6Q8PH59;A0A6Q8PGU8;A0A6Q8PFN5;A0A6Q8PFB9;A0A6Q8PGY8;A0A6Q8PH52", "sequence": "…
	{"uid": "M0R1L5", "roi": 27, "R": 1.383974224, "exp_thr": 5.0, "exp_bin": false, "source": "KC2023", "note": "CL1- (mv)", "mw": null, "orig_ambiguous": false, "orig_multi_value": true, "og_uid": "A0A7P0TAE3;Q9ULX6;A0A7P0TAJ5;A0A7P0T847;A0A7P0TBP0;V9GZ50;A0A7P0T9N5;A0A7P0TAD3;M0R1L5;A0A7P0T8N3;M0R008", "sequence": "MSYTGFVQGSETTLQSTYSDTSAQPTCDYGYGTWNSGTNRELTSA", "mapped_roi": 27, "window_seq": "TY…
	{"uid": "A0A7P0T8N3", "roi": 27, "R": 1.383974224, "exp_thr": 5.0, "exp_bin": false, "source": "KC2023", "note": "CL1- (mv)", "mw": null, "orig_ambiguous": false, "orig_multi_value": true, "og_uid": "A0A7P0TAE3;Q9ULX6;A0A7P0TAJ5;A0A7P0T847;A0A7P0TBP0;V9GZ50;A0A7P0T9N5;A0A7P0TAD3;M0R1L5;A0A7P0T8N3;M0R008", "sequence": "MSYTGFVQGSETTLQSTYSDTSAQPTCDYGYGTWNSGTNRGMTLMSPATRGPS", "mapped_roi": 27, "wind…
	{"uid": "M0R008", "roi": 27, "R": 1.383974224, "exp_thr": 5.0, "exp_bin": false, "source": "KC2023", "note": "CL1- (mv)", "mw": null, "orig_ambiguous": false, "orig_multi_value": true, "og_uid": "A0A7P0TAE3;Q9ULX6;A0A7P0TAJ5;A0A7P0T847;A0A7P0TBP0;V9GZ50;A0A7P0T9N5;A0A7P0TAD3;M0R1L5;A0A7P0T8N3;M0R008", "sequence": "MSYTGFVQGSETTLQSTYSDTSAQPTCDYGYGTWNSGTNRGYEGYGYGYGYGQDNTTNYGYELTSA", "mapped_roi": …
	{"uid": "G3V3X4", "roi": 8, "R": 1.378784849, "exp_thr": 5.0, "exp_bin": false, "source": "KC2023", "note": "CL1- (mv)", "mw": null, "orig_ambiguous": false, "orig_multi_value": true, "og_uid": "P60983;G3V4P8;G3V3X4", "sequence": "MSESLVVCDVAEDLVEKLRKFRFRKETNNAAIIRHFTR", "mapped_roi": 8, "window_seq": "MSESLVVCDVAEDLVEKL"}
	{"uid": "F8VZX2", "roi": 109, "R": 1.368378607, "exp_thr": 5.0, "exp_bin": false, "source": "KC2023", "note": "CL1- (mv)", "mw": null, "orig_ambiguous": false, "orig_multi_value": true, "og_uid": "F8VZX2;H3BRU6;F8W0G4;F8VXH9;F8W1G6;H3BND9;J3QT27;Q15366", "sequence": "MDTGVIEGGLNVTLTIRLLMHGKEVGSIIGKKGESVKKMREESGARINISEGNCPERIITLAGPTNAIFKAFAMIIDKLEEDISSSMTNSTAASRPPVTLRLVVPASQCGSLIGKGGCKIKEIRESTGAQV…
	{"uid": "F8VZX2", "roi": 54, "R": 1.03437772, "exp_thr": 5.0, "exp_bin": false, "source": "KC2023", "note": "CL1- (mv)", "mw": null, "orig_ambiguous": false, "orig_multi_value": true, "og_uid": "F8VZX2;H3BRU6;F8W0G4;F8VXH9;F8W1G6;J3QT27;F8VTZ0;Q15366;Q15365", "sequence": "MDTGVIEGGLNVTLTIRLLMHGKEVGSIIGKKGESVKKMREESGARINISEGNCPERIITLAGPTNAIFKAFAMIIDKLEEDISSSMTNSTAASRPPVTLRLVVPASQCGSLIGKGGCKIKEIRES…
	{"uid": "F8VZX2", "roi": 158, "R": 1.007389115, "exp_thr": 5.0, "exp_bin": false, "source": "KC2023", "note": "CL1- (mv)", "mw": null, "orig_ambiguous": false, "orig_multi_value": true, "og_uid": "F8VRH0;F8VZX2;H3BRU6;F8VXH9;Q15366", "sequence": "MDTGVIEGGLNVTLTIRLLMHGKEVGSIIGKKGESVKKMREESGARINISEGNCPERIITLAGPTNAIFKAFAMIIDKLEEDISSSMTNSTAASRPPVTLRLVVPASQCGSLIGKGGCKIKEIRESTGAQVQVAGDMLPNSTERAITIAGIP…
	{"uid": "A0A6I8PU73", "roi": 7, "R": 1.352656327, "exp_thr": 5.0, "exp_bin": false, "source": "KC2023", "note": "CL1- (mv)", "mw": null, "orig_ambiguous": false, "orig_multi_value": true, "og_uid": "Q99615;A0A6I8PU73;A0A6I8PIK4;A0A6I8PR89;A0A6I8PU89;K7ESP1;K7ELJ8", "sequence": "MAAAAECDVVMAATEPELLDDQEAKREAETFKEQGNAYYAKKDYNEAYNYYTKAIDMCPKNASYYGNRAATLMMLGRFREALGDAQQSVRLDDSFVRGHLREGKCHLSLGNAMAACRSFQ…
	{"uid": "A0A6I8PU73", "roi": 7, "R": 0.881708893, "exp_thr": 5.0, "exp_bin": false, "source": "KC2023", "note": "CL1- (mv)", "mw": null, "orig_ambiguous": false, "orig_multi_value": true, "og_uid": "Q99615;A0A6I8PU73;A0A6I8PIK4;A0A6I8PR89;A0A6I8PU89;K7ESP1;K7ELJ8;K7ENB7", "sequence": "MAAAAECDVVMAATEPELLDDQEAKREAETFKEQGNAYYAKKDYNEAYNYYTKAIDMCPKNASYYGNRAATLMMLGRFREALGDAQQSVRLDDSFVRGHLREGKCHLSLGNAM…
	{"uid": "A0A6I8PIK4", "roi": 7, "R": 1.352656327, "exp_thr": 5.0, "exp_bin": false, "source": "KC2023", "note": "CL1- (mv)", "mw": null, "orig_ambiguous": false, "orig_multi_value": true, "og_uid": "Q99615;A0A6I8PU73;A0A6I8PIK4;A0A6I8PR89;A0A6I8PU89;K7ESP1;K7ELJ8", "sequence": "MAAAAECDVVMAATEPELLDDQEAKREAETFKEQGNAYYAKKDYNEAYNYYTKAIDMCPKNASYYGNRAATLMMLGRFREALGDAQQSVRLDDSFVRFKNANAVMEYEKIAETDFEKRDF…
	{"uid": "A0A6I8PIK4", "roi": 7, "R": 0.881708893, "exp_thr": 5.0, "exp_bin": false, "source": "KC2023", "note": "CL1- (mv)", "mw": null, "orig_ambiguous": false, "orig_multi_value": true, "og_uid": "Q99615;A0A6I8PU73;A0A6I8PIK4;A0A6I8PR89;A0A6I8PU89;K7ESP1;K7ELJ8;K7ENB7", "sequence": "MAAAAECDVVMAATEPELLDDQEAKREAETFKEQGNAYYAKKDYNEAYNYYTKAIDMCPKNASYYGNRAATLMMLGRFREALGDAQQSVRLDDSFVRFKNANAVMEYEKIAET…
	{"uid": "A0A6I8PR89", "roi": 7, "R": 1.352656327, "exp_thr": 5.0, "exp_bin": false, "source": "KC2023", "note": "CL1- (mv)", "mw": null, "orig_ambiguous": false, "orig_multi_value": true, "og_uid": "Q99615;A0A6I8PU73;A0A6I8PIK4;A0A6I8PR89;A0A6I8PU89;K7ESP1;K7ELJ8", "sequence": "MAAAAECDVVMAATEPELLDDQEAKREAETFKEQGNAYYAKKDYNEAYNYYTKAIDMCPKNASYYGNRAATLMMLGRFREALGDAQQSVRLDDSFVRGHLREGKCHLSLGNAMAACRSFQ…
	{"uid": "A0A6I8PR89", "roi": 7, "R": 0.881708893, "exp_thr": 5.0, "exp_bin": false, "source": "KC2023", "note": "CL1- (mv)", "mw": null, "orig_ambiguous": false, "orig_multi_value": true, "og_uid": "Q99615;A0A6I8PU73;A0A6I8PIK4;A0A6I8PR89;A0A6I8PU89;K7ESP1;K7ELJ8;K7ENB7", "sequence": "MAAAAECDVVMAATEPELLDDQEAKREAETFKEQGNAYYAKKDYNEAYNYYTKAIDMCPKNASYYGNRAATLMMLGRFREALGDAQQSVRLDDSFVRGHLREGKCHLSLGNAM…
	{"uid": "A0A6I8PU89", "roi": 7, "R": 1.352656327, "exp_thr": 5.0, "exp_bin": false, "source": "KC2023", "note": "CL1- (mv)", "mw": null, "orig_ambiguous": false, "orig_multi_value": true, "og_uid": "Q99615;A0A6I8PU73;A0A6I8PIK4;A0A6I8PR89;A0A6I8PU89;K7ESP1;K7ELJ8", "sequence": "MAAAAECDVVMAATEPELLDDQEAKREAETFKEQGNAYYAKKDYNEAYNYYTKAIDMCPKNASYYGNRAATLMMLGRFREALGDAQQSVRLDDSFVRGHLREGKCHLSLGNAMAACRSFQ…
	{"uid": "A0A6I8PU89", "roi": 7, "R": 0.881708893, "exp_thr": 5.0, "exp_bin": false, "source": "KC2023", "note": "CL1- (mv)", "mw": null, "orig_ambiguous": false, "orig_multi_value": true, "og_uid": "Q99615;A0A6I8PU73;A0A6I8PIK4;A0A6I8PR89;A0A6I8PU89;K7ESP1;K7ELJ8;K7ENB7", "sequence": "MAAAAECDVVMAATEPELLDDQEAKREAETFKEQGNAYYAKKDYNEAYNYYTKAIDMCPKNASYYGNRAATLMMLGRFREALGDAQQSVRLDDSFVRGHLREGKCHLSLGNAM…
	{"uid": "K7ESP1", "roi": 7, "R": 1.352656327, "exp_thr": 5.0, "exp_bin": false, "source": "KC2023", "note": "CL1- (mv)", "mw": null, "orig_ambiguous": false, "orig_multi_value": true, "og_uid": "Q99615;A0A6I8PU73;A0A6I8PIK4;A0A6I8PR89;A0A6I8PU89;K7ESP1;K7ELJ8", "sequence": "MAAAAECDVVMAATEPELLDDQEAKREAETFKEQGNAYYAKKDYNEAYNYYTKAIDMCPKNASYYGNRAATLMMLGRFREALGDAQQSVRLDDSFVRGHLREGKCHLSLGNAMAACRSFQRALE…
	{"uid": "K7ESP1", "roi": 7, "R": 0.881708893, "exp_thr": 5.0, "exp_bin": false, "source": "KC2023", "note": "CL1- (mv)", "mw": null, "orig_ambiguous": false, "orig_multi_value": true, "og_uid": "Q99615;A0A6I8PU73;A0A6I8PIK4;A0A6I8PR89;A0A6I8PU89;K7ESP1;K7ELJ8;K7ENB7", "sequence": "MAAAAECDVVMAATEPELLDDQEAKREAETFKEQGNAYYAKKDYNEAYNYYTKAIDMCPKNASYYGNRAATLMMLGRFREALGDAQQSVRLDDSFVRGHLREGKCHLSLGNAMAACR…
	{"uid": "K7ELJ8", "roi": 7, "R": 1.352656327, "exp_thr": 5.0, "exp_bin": false, "source": "KC2023", "note": "CL1- (mv)", "mw": null, "orig_ambiguous": false, "orig_multi_value": true, "og_uid": "Q99615;A0A6I8PU73;A0A6I8PIK4;A0A6I8PR89;A0A6I8PU89;K7ESP1;K7ELJ8", "sequence": "MAAAAECDVVMAATEPELLDDQEAKREAETFKEQGNAYYAKKDYNEAYNYYTKAIDMCPKNASYYGNRAATLMMLGRFREALGDAQQSVRLDDSFVRGHLREGKCHLSLGNAMAACRSFQRALE…
	{"uid": "K7ELJ8", "roi": 7, "R": 0.881708893, "exp_thr": 5.0, "exp_bin": false, "source": "KC2023", "note": "CL1- (mv)", "mw": null, "orig_ambiguous": false, "orig_multi_value": true, "og_uid": "Q99615;A0A6I8PU73;A0A6I8PIK4;A0A6I8PR89;A0A6I8PU89;K7ESP1;K7ELJ8;K7ENB7", "sequence": "MAAAAECDVVMAATEPELLDDQEAKREAETFKEQGNAYYAKKDYNEAYNYYTKAIDMCPKNASYYGNRAATLMMLGRFREALGDAQQSVRLDDSFVRGHLREGKCHLSLGNAMAACR…
	{"uid": "A0A494C1S7", "roi": 607, "R": 1.349874222, "exp_thr": 5.0, "exp_bin": false, "source": "KC2023", "note": "CL1- (mv)", "mw": null, "orig_ambiguous": false, "orig_multi_value": true, "og_uid": "Q9Y5Q9;A0A494C1S7;H7C0C0", "sequence": "MSGFSPELIDYLEGKISFEEFERRREERKTREKKSLQEKGKLSAEENPDDSEVPSSSGINSTKSQDKDVNEGETSDGVRKSVHKVFASMLGENEDDEEEEEEEEEEEEEEETPEQPTAGDVFVLEMVLNRETKKMMKEKRPRSKLPRALRGLMGEANI…
	{"uid": "U3KQ54", "roi": 13, "R": 1.346736902, "exp_thr": 5.0, "exp_bin": false, "source": "KC2023", "note": "CL1- (mv)", "mw": null, "orig_ambiguous": false, "orig_multi_value": true, "og_uid": "U3KQ54;Q6P1K2;V9GYI0;A0A087WT04", "sequence": "MAEASSANLGSGCEEKRHEGSSSESVPPGTTISRVKLLDTMVDTFLQKLVAAGSYQRFTDCYKCFYQLQPAMTQQIYDKFIAQLQTSIREEISDIKEEGNLEAVLNALDKIVEEGKVRKEPAWRPSGIPEKDLHSVMAPYFLQQRDTLRRHVQKQE…
	{"uid": "U3KQ54", "roi": 64, "R": 0.778936969, "exp_thr": 5.0, "exp_bin": false, "source": "KC2023", "note": "CL1- (mv)", "mw": null, "orig_ambiguous": false, "orig_multi_value": true, "og_uid": "U3KQ54;Q6P1K2", "sequence": "MAEASSANLGSGCEEKRHEGSSSESVPPGTTISRVKLLDTMVDTFLQKLVAAGSYQRFTDCYKCFYQLQPAMTQQIYDKFIAQLQTSIREEISDIKEEGNLEAVLNALDKIVEEGKVRKEPAWRPSGIPEKDLHSVMAPYFLQQRDTLRRHVQKQEAENQQLADAVLAGRRQVE…
	{"uid": "V9GYI0", "roi": 13, "R": 1.346736902, "exp_thr": 5.0, "exp_bin": false, "source": "KC2023", "note": "CL1- (mv)", "mw": null, "orig_ambiguous": false, "orig_multi_value": true, "og_uid": "U3KQ54;Q6P1K2;V9GYI0;A0A087WT04", "sequence": "MAEASSANLGSGCEEKRHEGSSSESVPPGTTISRVKLLDTMVDTFLQKLVAAGRRSFTLVAQTGVQWRDLGSWQPPPPGFKQFSSAS", "mapped_roi": 13, "window_seq": "EASSANLGSGCEEKRHEGSSS"}
	{"uid": "A0A087WT04", "roi": 13, "R": 1.346736902, "exp_thr": 5.0, "exp_bin": false, "source": "KC2023", "note": "CL1- (mv)", "mw": null, "orig_ambiguous": false, "orig_multi_value": true, "og_uid": "U3KQ54;Q6P1K2;V9GYI0;A0A087WT04", "sequence": "MAEASSANLGSGCEEKRHEGSSSESVPPGTTISRVKLLDTMVDTFLQKLVAAGRRPSGIPEKDLHSVMAPYFLQQRDTLRRHVQKQEAENQQLADAVLAGRRQVEELQLQVQAQQQAWQVRSPAVQSPAKVQPLCPSRRAAR", "mapped…
	{"uid": "A0A5H1ZRS1", "roi": 1577, "R": 1.338268315, "exp_thr": 5.0, "exp_bin": false, "source": "KC2023", "note": "CL1- (mv)", "mw": null, "orig_ambiguous": false, "orig_multi_value": true, "og_uid": "A0A5H1ZRS1;Q15154;A0A4W8VX11;H0YBA1", "sequence": "MATGGGPFEDGMNDQDLPNWSNENVDDRLNNMDWGAQQKKANRSSEKNKKKFGVESDKRVTNDISPESSPGVGRRRTKTPHTFPHSRYMSQMSVPEQAELEKLKQRINFSDLDQRSIGSDSQGRATAANNKRQLSENRKPFNFLPM…
	{"uid": "A0A5H1ZRS1", "roi": 582, "R": 1.145294413, "exp_thr": 5.0, "exp_bin": false, "source": "KC2023", "note": "CL1- (mv)", "mw": null, "orig_ambiguous": false, "orig_multi_value": true, "og_uid": "A0A5H1ZRS1;E7EV93;Q15154;A0A4W8VX11", "sequence": "MATGGGPFEDGMNDQDLPNWSNENVDDRLNNMDWGAQQKKANRSSEKNKKKFGVESDKRVTNDISPESSPGVGRRRTKTPHTFPHSRYMSQMSVPEQAELEKLKQRINFSDLDQRSIGSDSQGRATAANNKRQLSENRKPFNFLPMQ…
	{"uid": "A0A5H1ZRS1", "roi": 876, "R": 0.940123111, "exp_thr": 5.0, "exp_bin": false, "source": "KC2023", "note": "CL1- (mv)", "mw": null, "orig_ambiguous": false, "orig_multi_value": true, "og_uid": "A0A5H1ZRS1;Q15154;A0A4W8VX11", "sequence": "MATGGGPFEDGMNDQDLPNWSNENVDDRLNNMDWGAQQKKANRSSEKNKKKFGVESDKRVTNDISPESSPGVGRRRTKTPHTFPHSRYMSQMSVPEQAELEKLKQRINFSDLDQRSIGSDSQGRATAANNKRQLSENRKPFNFLPMQINTNKSK…
	{"uid": "A0A5H1ZRS1", "roi": 171, "R": 0.214991573, "exp_thr": 5.0, "exp_bin": false, "source": "KC2023", "note": "CL1- (mv)", "mw": null, "orig_ambiguous": false, "orig_multi_value": true, "og_uid": "A0A5H1ZRS1;E7EV93;E5RGQ4;E9PGW9;Q15154;A0A4W8VX11", "sequence": "MATGGGPFEDGMNDQDLPNWSNENVDDRLNNMDWGAQQKKANRSSEKNKKKFGVESDKRVTNDISPESSPGVGRRRTKTPHTFPHSRYMSQMSVPEQAELEKLKQRINFSDLDQRSIGSDSQGRATAANNKRQ…
	{"uid": "F8WCR1", "roi": 114, "R": 1.326196056, "exp_thr": 5.0, "exp_bin": false, "source": "KC2023", "note": "CL1- (mv)", "mw": null, "orig_ambiguous": false, "orig_multi_value": true, "og_uid": "P39023;G5E9G0;H7C422;B5MCW2;H7C3M2;F8WCR1", "sequence": "MSHRKFSAPRHGSLGFLPRKRSSRHRGKVKSFPKDDPSKPVHLTAFLGYKAGMTHIVREVDRPGSKVNKKEVVEAVTIVETPPMVVVGIVGYVETPRGLRTFKTVFAEHISDECKRRFYKNCSARLCPMSSIQAPLAGGKGSLEA…
	{"uid": "F8WCR1", "roi": 114, "R": 0.445184318, "exp_thr": 5.0, "exp_bin": false, "source": "KC2023", "note": "CL1- (mv)", "mw": null, "orig_ambiguous": false, "orig_multi_value": true, "og_uid": "P39023;G5E9G0;H7C422;B5MCW2;H7C3M2;F8WCR1", "sequence": "MSHRKFSAPRHGSLGFLPRKRSSRHRGKVKSFPKDDPSKPVHLTAFLGYKAGMTHIVREVDRPGSKVNKKEVVEAVTIVETPPMVVVGIVGYVETPRGLRTFKTVFAEHISDECKRRFYKNCSARLCPMSSIQAPLAGGKGSLEA…
	{"uid": "A0A087WSV0", "roi": 182, "R": 1.324259354, "exp_thr": 5.0, "exp_bin": false, "source": "KC2023", "note": "CL1- (mv)", "mw": null, "orig_ambiguous": false, "orig_multi_value": true, "og_uid": "A0A087WSV0;Q9HB09", "sequence": "MAGSEELGLREDTLRVLAAFLRRGEAAGSPVPTPPRSPAQEEPTDFLSRLRRCLPCSLGRGAAPSESPRPCSLPIRPCYGLEPGPATPDFYALVAQRLEQLVQEQLKSPPSPELQGPPSTEKEAILRRLVALLEEEAEVINQKLASDPALRSKLVRLSSDSFARL…
	{"uid": "X6R3R3", "roi": 148, "R": 1.322656798, "exp_thr": 5.0, "exp_bin": false, "source": "KC2023", "note": "CL1- (mv)", "mw": null, "orig_ambiguous": false, "orig_multi_value": true, "og_uid": "O94964;X6R3R3", "sequence": "MLEMRDVYMEEDVYQLQELRQQLDQASKTCRILQYRLRKAERRSLRAAQTGQVDGELIRGLEQDVKVSKDISMRLHKELEVVEKKRARLEEENEELRQRLIETELAKQVLQTELERPREHSLKKRGTRSLGKADKKTLVQEDSADLKCQLHFAKEESALMCKKLTKLAKENDS…
	{"uid": "A0A5F9W493", "roi": 153, "R": 1.3173976, "exp_thr": 5.0, "exp_bin": false, "source": "KC2023", "note": "CL1- (mv)", "mw": null, "orig_ambiguous": false, "orig_multi_value": true, "og_uid": "A0A5F9W493;E7ETM0", "sequence": "MASSSGSKAEFIVGGKYKLVRKIGSGSFGDIYLAINITNGEEVAVKLESQKARHPQLLYESKLYKILQGGVGIPHIRWYGQEKDYNVLVMDLLGPSLEDLFNFCSRRFTMKTVLMLADQMISRIEYVHTKNFIHRDIKPDNFLMGIGRHCNKCLESPVGKRKRSMTV…
	{"uid": "A0A2U3TZH3", "roi": 31, "R": 1.317330995, "exp_thr": 5.0, "exp_bin": false, "source": "KC2023", "note": "CL1- (mv)", "mw": null, "orig_ambiguous": false, "orig_multi_value": true, "og_uid": "A0A2U3TZH3;Q05639;A0A2R8Y488;A0A2R8Y660;A0A2R8YDN5;A0A6Q8PFK6;Q5VTE0;P68104;A0A7I2V659;A0A087WVQ9;A0A7I2V5N4;A0A7I2V3H3;A0A087WV01;A6PW80;Q5JR01", "sequence": "MGKEKTHINIVVIGHVDSGKSTTTGHLIYKCGGIDKRTI…
	{"uid": "A0A2U3TZH3", "roi": 326, "R": 0.873447971, "exp_thr": 5.0, "exp_bin": false, "source": "KC2023", "note": "CL1- (mv)", "mw": null, "orig_ambiguous": false, "orig_multi_value": true, "og_uid": "A0A2U3TZH3;Q05639", "sequence": "MGKEKTHINIVVIGHVDSGKSTTTGHLIYKCGGIDKRTIEKFEKEAAEMGKGSFKYAWVLDKLKAERERGITIDISLWKFETTKYYITIIDAPGHRDFIKNMITGTSQADCAVLIVAAGVGEFEAGISKNGQTREHALLAYTLGVKQLIVGVNKMDSTEPAYSEK…
	{"uid": "A0A2U3TZH3", "roi": 411, "R": 0.742408533, "exp_thr": 5.0, "exp_bin": false, "source": "KC2023", "note": "CL1- (mv)", "mw": null, "orig_ambiguous": false, "orig_multi_value": true, "og_uid": "A0A2U3TZH3;Q05639", "sequence": "MGKEKTHINIVVIGHVDSGKSTTTGHLIYKCGGIDKRTIEKFEKEAAEMGKGSFKYAWVLDKLKAERERGITIDISLWKFETTKYYITIIDAPGHRDFIKNMITGTSQADCAVLIVAAGVGEFEAGISKNGQTREHALLAYTLGVKQLIVGVNKMDSTEPAYSEK…
	{"uid": "A0A2U3TZH3", "roi": 326, "R": 0.0, "exp_thr": 5.0, "exp_bin": false, "source": "KC2023", "note": "CL1- (mv)", "mw": null, "orig_ambiguous": false, "orig_multi_value": true, "og_uid": "A0A2U3TZH3;Q05639", "sequence": "MGKEKTHINIVVIGHVDSGKSTTTGHLIYKCGGIDKRTIEKFEKEAAEMGKGSFKYAWVLDKLKAERERGITIDISLWKFETTKYYITIIDAPGHRDFIKNMITGTSQADCAVLIVAAGVGEFEAGISKNGQTREHALLAYTLGVKQLIVGVNKMDSTEPAYSEKRYDEIVKE…
	{"uid": "A0A2U3TZH3", "roi": 31, "R": 1.317330995, "exp_thr": 5.0, "exp_bin": false, "source": "KC2023", "note": "CL1- (mv)", "mw": null, "orig_ambiguous": false, "orig_multi_value": true, "og_uid": "A0A2U3TZH3;Q05639;A0A2R8Y488;A0A2R8Y660;A0A2R8YDN5;A0A6Q8PFK6;Q5VTE0;P68104;A0A7I2V659;A0A087WVQ9;A0A7I2V5N4;A0A7I2V3H3;A0A087WV01;A6PW80;Q5JR01", "sequence": "MGKEKTHINIVVIGHVDSGKSTTTGHLIYKCGGIDKRTI…
	{"uid": "A0A2U3TZH3", "roi": 31, "R": 1.317330995, "exp_thr": 5.0, "exp_bin": false, "source": "KC2023", "note": "CL1- (mv)", "mw": null, "orig_ambiguous": false, "orig_multi_value": true, "og_uid": "A0A2U3TZH3;Q05639;A0A2R8Y488;A0A2R8Y660;A0A2R8YDN5;A0A6Q8PFK6;Q5VTE0;P68104;A0A7I2V659;A0A087WVQ9;A0A7I2V5N4;A0A7I2V3H3;A0A087WV01;A6PW80;Q5JR01", "sequence": "MGKEKTHINIVVIGHVDSGKSTTTGHLIYKCGGIDKRTI…
	{"uid": "A0A2U3TZH3", "roi": 31, "R": 1.317330995, "exp_thr": 5.0, "exp_bin": false, "source": "KC2023", "note": "CL1- (mv)", "mw": null, "orig_ambiguous": false, "orig_multi_value": true, "og_uid": "A0A2U3TZH3;Q05639;A0A2R8Y488;A0A2R8Y660;A0A2R8YDN5;A0A6Q8PFK6;Q5VTE0;P68104;A0A7I2V659;A0A087WVQ9;A0A7I2V5N4;A0A7I2V3H3;A0A087WV01;A6PW80;Q5JR01", "sequence": "MGKEKTHINIVVIGHVDSGKSTTTGHLIYKCGGIDKRTI…
	{"uid": "A0A6Q8PFK6", "roi": 31, "R": 1.317330995, "exp_thr": 5.0, "exp_bin": false, "source": "KC2023", "note": "CL1- (mv)", "mw": null, "orig_ambiguous": false, "orig_multi_value": true, "og_uid": "A0A2U3TZH3;Q05639;A0A2R8Y488;A0A2R8Y660;A0A2R8YDN5;A0A6Q8PFK6;Q5VTE0;P68104;A0A7I2V659;A0A087WVQ9;A0A7I2V5N4;A0A7I2V3H3;A0A087WV01;A6PW80;Q5JR01", "sequence": "MGKEKTHINIVVIGHVDSGKSTTTGHLIYKCGGIDKRTI…
	{"uid": "A0A2R8YEM0", "roi": 13, "R": 1.301286727, "exp_thr": 5.0, "exp_bin": false, "source": "KC2023", "note": "CL1- (mv)", "mw": null, "orig_ambiguous": false, "orig_multi_value": true, "og_uid": "A0A2R8YEM0;A0A2R8Y5L0;F2Z3M0;A0A2R8Y6M5;E9PPN1;H0YCV5;A0A2R8YHG0;A0A2R8YG40;A0A2R8YDU8;A0A2U3TZM3;A0A2R8Y6A4;A0A2R8Y6B3;Q8WW01", "sequence": "MEERGDSEPTPGCSGLGPGGVRGFGDGGGAPSWAPEDAWMGTHPKK", "mapped_…
	{"uid": "A0A2R8Y5L0", "roi": 13, "R": 1.301286727, "exp_thr": 5.0, "exp_bin": false, "source": "KC2023", "note": "CL1- (mv)", "mw": null, "orig_ambiguous": false, "orig_multi_value": true, "og_uid": "A0A2R8YEM0;A0A2R8Y5L0;F2Z3M0;A0A2R8Y6M5;E9PPN1;H0YCV5;A0A2R8YHG0;A0A2R8YG40;A0A2R8YDU8;A0A2U3TZM3;A0A2R8Y6A4;A0A2R8Y6B3;Q8WW01", "sequence": "MEERGDSEPTPGCSGLGPGGVRGFGDGGGAPSWAPEDAWMGTHPKAKAGMK", "ma…
	{"uid": "F2Z3M0", "roi": 13, "R": 1.301286727, "exp_thr": 5.0, "exp_bin": false, "source": "KC2023", "note": "CL1- (mv)", "mw": null, "orig_ambiguous": false, "orig_multi_value": true, "og_uid": "A0A2R8YEM0;A0A2R8Y5L0;F2Z3M0;A0A2R8Y6M5;E9PPN1;H0YCV5;A0A2R8YHG0;A0A2R8YG40;A0A2R8YDU8;A0A2U3TZM3;A0A2R8Y6A4;A0A2R8Y6B3;Q8WW01", "sequence": "MEERGDSEPTPGCSGLGPGGVRGFGDGGGAPSWAPEDAWMGTHPKYLEMMELDIGDATQVY…
	{"uid": "A0A2R8Y6M5", "roi": 13, "R": 1.301286727, "exp_thr": 5.0, "exp_bin": false, "source": "KC2023", "note": "CL1- (mv)", "mw": null, "orig_ambiguous": false, "orig_multi_value": true, "og_uid": "A0A2R8YEM0;A0A2R8Y5L0;F2Z3M0;A0A2R8Y6M5;E9PPN1;H0YCV5;A0A2R8YHG0;A0A2R8YG40;A0A2R8YDU8;A0A2U3TZM3;A0A2R8Y6A4;A0A2R8Y6B3;Q8WW01", "sequence": "MEERGDSEPTPGCSGLGPGGVRGFGDGGGAPSWAPEDAWMGTHPKYLEMMELDIGDA…
	{"uid": "E9PPN1", "roi": 13, "R": 1.301286727, "exp_thr": 5.0, "exp_bin": false, "source": "KC2023", "note": "CL1- (mv)", "mw": null, "orig_ambiguous": false, "orig_multi_value": true, "og_uid": "A0A2R8YEM0;A0A2R8Y5L0;F2Z3M0;A0A2R8Y6M5;E9PPN1;H0YCV5;A0A2R8YHG0;A0A2R8YG40;A0A2R8YDU8;A0A2U3TZM3;A0A2R8Y6A4;A0A2R8Y6B3;Q8WW01", "sequence": "MEERGDSEPTPGCSGLGPGGVRGFGDGGGAPSWAPEDAWMGTHPKYLEMMELDIGDATQVY…
	{"uid": "H0YCV5", "roi": 13, "R": 1.301286727, "exp_thr": 5.0, "exp_bin": false, "source": "KC2023", "note": "CL1- (mv)", "mw": null, "orig_ambiguous": false, "orig_multi_value": true, "og_uid": "A0A2R8YEM0;A0A2R8Y5L0;F2Z3M0;A0A2R8Y6M5;E9PPN1;H0YCV5;A0A2R8YHG0;A0A2R8YG40;A0A2R8YDU8;A0A2U3TZM3;A0A2R8Y6A4;A0A2R8Y6B3;Q8WW01", "sequence": "MEERGDSEPTPGCSGLGPGGVRGFGDGGGAPSWAPEDAWMGTHPKYLEMMELDIGDATQVY…
	{"uid": "A0A2R8YHG0", "roi": 13, "R": 1.301286727, "exp_thr": 5.0, "exp_bin": false, "source": "KC2023", "note": "CL1- (mv)", "mw": null, "orig_ambiguous": false, "orig_multi_value": true, "og_uid": "A0A2R8YEM0;A0A2R8Y5L0;F2Z3M0;A0A2R8Y6M5;E9PPN1;H0YCV5;A0A2R8YHG0;A0A2R8YG40;A0A2R8YDU8;A0A2U3TZM3;A0A2R8Y6A4;A0A2R8Y6B3;Q8WW01", "sequence": "MEERGDSEPTPGCSGLGPGGVRGFGDGGGAPSWAPEDAWMGTHPKYLEMMELDIGDA…
	{"uid": "A0A2R8YG40", "roi": 13, "R": 1.301286727, "exp_thr": 5.0, "exp_bin": false, "source": "KC2023", "note": "CL1- (mv)", "mw": null, "orig_ambiguous": false, "orig_multi_value": true, "og_uid": "A0A2R8YEM0;A0A2R8Y5L0;F2Z3M0;A0A2R8Y6M5;E9PPN1;H0YCV5;A0A2R8YHG0;A0A2R8YG40;A0A2R8YDU8;A0A2U3TZM3;A0A2R8Y6A4;A0A2R8Y6B3;Q8WW01", "sequence": "MEERGDSEPTPGCSGLGPGGVRGFGDGGGAPSWAPEDAWMGTHPKYLEMMELDIGDA…
	{"uid": "A0A2R8YDU8", "roi": 13, "R": 1.301286727, "exp_thr": 5.0, "exp_bin": false, "source": "KC2023", "note": "CL1- (mv)", "mw": null, "orig_ambiguous": false, "orig_multi_value": true, "og_uid": "A0A2R8YEM0;A0A2R8Y5L0;F2Z3M0;A0A2R8Y6M5;E9PPN1;H0YCV5;A0A2R8YHG0;A0A2R8YG40;A0A2R8YDU8;A0A2U3TZM3;A0A2R8Y6A4;A0A2R8Y6B3;Q8WW01", "sequence": "MEERGDSEPTPGCSGLGPGGVRGFGDGGGAPSWAPEDAWMGTHPKYLEMMELDIGDA…
	{"uid": "A0A2U3TZM3", "roi": 13, "R": 1.301286727, "exp_thr": 5.0, "exp_bin": false, "source": "KC2023", "note": "CL1- (mv)", "mw": null, "orig_ambiguous": false, "orig_multi_value": true, "og_uid": "A0A2R8YEM0;A0A2R8Y5L0;F2Z3M0;A0A2R8Y6M5;E9PPN1;H0YCV5;A0A2R8YHG0;A0A2R8YG40;A0A2R8YDU8;A0A2U3TZM3;A0A2R8Y6A4;A0A2R8Y6B3;Q8WW01", "sequence": "MEERGDSEPTPGCSGLGPGGVRGFGDGGGAPSWAPEDAWMGTHPKYLEMMELDIGDA…
	{"uid": "A0A2R8Y6A4", "roi": 13, "R": 1.301286727, "exp_thr": 5.0, "exp_bin": false, "source": "KC2023", "note": "CL1- (mv)", "mw": null, "orig_ambiguous": false, "orig_multi_value": true, "og_uid": "A0A2R8YEM0;A0A2R8Y5L0;F2Z3M0;A0A2R8Y6M5;E9PPN1;H0YCV5;A0A2R8YHG0;A0A2R8YG40;A0A2R8YDU8;A0A2U3TZM3;A0A2R8Y6A4;A0A2R8Y6B3;Q8WW01", "sequence": "MEERGDSEPTPGCSGLGPGGVRGFGDGGGAPSWAPEDAWMGTHPKYLEMMELDIGDA…
	{"uid": "A0A2R8Y6B3", "roi": 13, "R": 1.301286727, "exp_thr": 5.0, "exp_bin": false, "source": "KC2023", "note": "CL1- (mv)", "mw": null, "orig_ambiguous": false, "orig_multi_value": true, "og_uid": "A0A2R8YEM0;A0A2R8Y5L0;F2Z3M0;A0A2R8Y6M5;E9PPN1;H0YCV5;A0A2R8YHG0;A0A2R8YG40;A0A2R8YDU8;A0A2U3TZM3;A0A2R8Y6A4;A0A2R8Y6B3;Q8WW01", "sequence": "MEERGDSEPTPGCSGLGPGGVRGFGDGGGAPSWAPEDAWMGTHPKYLEMMELDIGDA…
	{"uid": "A0A669KBL1", "roi": 350, "R": 1.297648445, "exp_thr": 5.0, "exp_bin": false, "source": "KC2023", "note": "CL1- (mv)", "mw": null, "orig_ambiguous": false, "orig_multi_value": true, "og_uid": "A0A669KBL1;Q93009;H3BND8;F5H2X1", "sequence": "MPPLRPIRKSRREPSFKRSQRRKSQPLPKALRCLPQEDPSTSHQSLWLLAEFSCSDHSTKQAGDTDDPPRITQNPVINGNVALSDGHNTAEEDMEDDTSWRSEATFQFTVERFSRLSESVLSPPCFVRNLPWKIMVMPRFYPDRPHQKSVG…
	{"uid": "A0A669KBL1", "roi": 350, "R": 0.402419741, "exp_thr": 5.0, "exp_bin": false, "source": "KC2023", "note": "CL1- (mv)", "mw": null, "orig_ambiguous": false, "orig_multi_value": true, "og_uid": "A0A669KBL1;Q93009;H3BND8;F5H2X1", "sequence": "MPPLRPIRKSRREPSFKRSQRRKSQPLPKALRCLPQEDPSTSHQSLWLLAEFSCSDHSTKQAGDTDDPPRITQNPVINGNVALSDGHNTAEEDMEDDTSWRSEATFQFTVERFSRLSESVLSPPCFVRNLPWKIMVMPRFYPDRPHQKSVG…
	{"uid": "K7ENA8", "roi": 139, "R": 1.297464491, "exp_thr": 5.0, "exp_bin": false, "source": "KC2023", "note": "CL1- (mv)", "mw": null, "orig_ambiguous": false, "orig_multi_value": true, "og_uid": "O75821;K7ENA8;K7EL20", "sequence": "MPTGDFDSKPSWADQVEEEGEDDKCVTSELLKGIPLATGDTSPEPELLPGAPLPPPKEVINGNIKTVTEYKIDEDGKKFKIVRTFRIETRKASKAVARRKNWKKFGNSEFDPPGPNVATTTVSDDVSMTFITSKEDLNCQEEEDPMNKLKGQKIVSCRICKGDHWT…
	{"uid": "J3QSX4", "roi": 129, "R": 1.295252086, "exp_thr": 5.0, "exp_bin": false, "source": "KC2023", "note": "CL1- (mv)", "mw": null, "orig_ambiguous": false, "orig_multi_value": true, "og_uid": "O43684;J3QT28;J3QSX4", "sequence": "MTGSNEFKLNQPPEDGISSVKFSPNTSQFLLVSSWDTSVRLYDVPANSMRLKYQHTGAVLDCAFYDPTHAWSGGLDHQLKMHDLNTDQENLVGTHDAPIRCVEYCPEVNVMVTGSWDQTVKLWDPRTPCNAGTFSQPEKVHLIIL", "mapped_roi": 129,…
	{"uid": "A0A7P0T8N2", "roi": 633, "R": 1.28734136, "exp_thr": 5.0, "exp_bin": false, "source": "KC2023", "note": "CL1- (mv)", "mw": null, "orig_ambiguous": false, "orig_multi_value": true, "og_uid": "Q14204;A0A2R8Y706;A0A7P0T9C4;A0A7P0TA13;A0A2R8Y5T0;A0A7P0T9R4;A0A7P0TAW9;A0A7P0T7V5;A0A7P0T916;A0A7P0T8N2;A0A7P0TBJ7;A0A7P0TAF3;A0A7P0TB75;A0A7P0T9K2;A0A2R8Y6H2;A0A7P0T9F1;A0A7P0T8W5;A0A2R8YFZ7;A0A7P…
	{"uid": "A0A7P0T8N2", "roi": 2639, "R": 0.797693757, "exp_thr": 5.0, "exp_bin": false, "source": "KC2023", "note": "CL1- (mv)", "mw": null, "orig_ambiguous": false, "orig_multi_value": true, "og_uid": "Q14204;A0A2R8Y706;A0A7P0T9C4;A0A7P0TA13;A0A2R8Y5T0;A0A7P0T9R4;A0A7P0TAW9;A0A7P0T7V5;A0A7P0T916;A0A7P0T8N2;A0A7P0TBJ7;A0A7P0TAF3;A0A7P0TB75;A0A7P0T9K2;A0A2R8Y6H2;A0A7P0T9F1;A0A7P0T8W5;A0A2R8YFZ7;A0A…
	{"uid": "A0A7P0T8N2", "roi": 867, "R": 0.782937647, "exp_thr": 5.0, "exp_bin": false, "source": "KC2023", "note": "CL1- (mv)", "mw": null, "orig_ambiguous": false, "orig_multi_value": true, "og_uid": "Q14204;A0A2R8Y706;A0A7P0T9C4;A0A7P0TA13;A0A2R8Y5T0;A0A7P0T9R4;A0A7P0TAW9;A0A7P0T7V5;A0A7P0T916;A0A7P0T8N2;A0A7P0TBJ7;A0A7P0TAF3;A0A7P0TB75;A0A7P0T9K2;A0A2R8Y6H2;A0A7P0T9F1;A0A7P0T8W5;A0A2R8YFZ7;A0A7…
	{"uid": "A0A7P0T8N2", "roi": 2712, "R": 0.761058513, "exp_thr": 5.0, "exp_bin": false, "source": "KC2023", "note": "CL1- (mv)", "mw": null, "orig_ambiguous": false, "orig_multi_value": true, "og_uid": "Q14204;A0A2R8Y706;A0A7P0T9C4;A0A7P0TA13;A0A2R8Y5T0;A0A7P0T9R4;A0A7P0TAW9;A0A7P0T7V5;A0A7P0T916;A0A7P0T8N2;A0A7P0TBJ7;A0A7P0TAF3;A0A7P0TB75;A0A7P0T9K2;A0A2R8Y6H2;A0A7P0T9F1;A0A7P0T8W5;A0A2R8YFZ7;A0A…
	{"uid": "A0A7P0T8N2", "roi": 1999, "R": 0.669931153, "exp_thr": 5.0, "exp_bin": false, "source": "KC2023", "note": "CL1- (mv)", "mw": null, "orig_ambiguous": false, "orig_multi_value": true, "og_uid": "Q14204;A0A2R8Y706;A0A7P0T9C4;A0A7P0TA13;A0A2R8Y5T0;A0A7P0T9R4;A0A7P0TAW9;A0A7P0T7V5;A0A7P0T916;A0A7P0T8N2;A0A7P0TBJ7;A0A7P0TAF3;A0A7P0TB75;A0A7P0T9K2;A0A2R8Y6H2;A0A7P0T9F1;A0A7P0T8W5;A0A2R8YFZ7;A0A…
	{"uid": "A0A7P0TBJ7", "roi": 633, "R": 1.28734136, "exp_thr": 5.0, "exp_bin": false, "source": "KC2023", "note": "CL1- (mv)", "mw": null, "orig_ambiguous": false, "orig_multi_value": true, "og_uid": "Q14204;A0A2R8Y706;A0A7P0T9C4;A0A7P0TA13;A0A2R8Y5T0;A0A7P0T9R4;A0A7P0TAW9;A0A7P0T7V5;A0A7P0T916;A0A7P0T8N2;A0A7P0TBJ7;A0A7P0TAF3;A0A7P0TB75;A0A7P0T9K2;A0A2R8Y6H2;A0A7P0T9F1;A0A7P0T8W5;A0A2R8YFZ7;A0A7P…
	{"uid": "A0A7P0TBJ7", "roi": 2639, "R": 0.797693757, "exp_thr": 5.0, "exp_bin": false, "source": "KC2023", "note": "CL1- (mv)", "mw": null, "orig_ambiguous": false, "orig_multi_value": true, "og_uid": "Q14204;A0A2R8Y706;A0A7P0T9C4;A0A7P0TA13;A0A2R8Y5T0;A0A7P0T9R4;A0A7P0TAW9;A0A7P0T7V5;A0A7P0T916;A0A7P0T8N2;A0A7P0TBJ7;A0A7P0TAF3;A0A7P0TB75;A0A7P0T9K2;A0A2R8Y6H2;A0A7P0T9F1;A0A7P0T8W5;A0A2R8YFZ7;A0A…
	{"uid": "A0A7P0TBJ7", "roi": 867, "R": 0.782937647, "exp_thr": 5.0, "exp_bin": false, "source": "KC2023", "note": "CL1- (mv)", "mw": null, "orig_ambiguous": false, "orig_multi_value": true, "og_uid": "Q14204;A0A2R8Y706;A0A7P0T9C4;A0A7P0TA13;A0A2R8Y5T0;A0A7P0T9R4;A0A7P0TAW9;A0A7P0T7V5;A0A7P0T916;A0A7P0T8N2;A0A7P0TBJ7;A0A7P0TAF3;A0A7P0TB75;A0A7P0T9K2;A0A2R8Y6H2;A0A7P0T9F1;A0A7P0T8W5;A0A2R8YFZ7;A0A7…
	{"uid": "A0A7P0TBJ7", "roi": 2712, "R": 0.761058513, "exp_thr": 5.0, "exp_bin": false, "source": "KC2023", "note": "CL1- (mv)", "mw": null, "orig_ambiguous": false, "orig_multi_value": true, "og_uid": "Q14204;A0A2R8Y706;A0A7P0T9C4;A0A7P0TA13;A0A2R8Y5T0;A0A7P0T9R4;A0A7P0TAW9;A0A7P0T7V5;A0A7P0T916;A0A7P0T8N2;A0A7P0TBJ7;A0A7P0TAF3;A0A7P0TB75;A0A7P0T9K2;A0A2R8Y6H2;A0A7P0T9F1;A0A7P0T8W5;A0A2R8YFZ7;A0A…
	{"uid": "A0A7P0TBJ7", "roi": 1999, "R": 0.669931153, "exp_thr": 5.0, "exp_bin": false, "source": "KC2023", "note": "CL1- (mv)", "mw": null, "orig_ambiguous": false, "orig_multi_value": true, "og_uid": "Q14204;A0A2R8Y706;A0A7P0T9C4;A0A7P0TA13;A0A2R8Y5T0;A0A7P0T9R4;A0A7P0TAW9;A0A7P0T7V5;A0A7P0T916;A0A7P0T8N2;A0A7P0TBJ7;A0A7P0TAF3;A0A7P0TB75;A0A7P0T9K2;A0A2R8Y6H2;A0A7P0T9F1;A0A7P0T8W5;A0A2R8YFZ7;A0A…
	{"uid": "A0A7P0TAF3", "roi": 633, "R": 1.28734136, "exp_thr": 5.0, "exp_bin": false, "source": "KC2023", "note": "CL1- (mv)", "mw": null, "orig_ambiguous": false, "orig_multi_value": true, "og_uid": "Q14204;A0A2R8Y706;A0A7P0T9C4;A0A7P0TA13;A0A2R8Y5T0;A0A7P0T9R4;A0A7P0TAW9;A0A7P0T7V5;A0A7P0T916;A0A7P0T8N2;A0A7P0TBJ7;A0A7P0TAF3;A0A7P0TB75;A0A7P0T9K2;A0A2R8Y6H2;A0A7P0T9F1;A0A7P0T8W5;A0A2R8YFZ7;A0A7P…
	{"uid": "A0A7P0TAF3", "roi": 2639, "R": 0.797693757, "exp_thr": 5.0, "exp_bin": false, "source": "KC2023", "note": "CL1- (mv)", "mw": null, "orig_ambiguous": false, "orig_multi_value": true, "og_uid": "Q14204;A0A2R8Y706;A0A7P0T9C4;A0A7P0TA13;A0A2R8Y5T0;A0A7P0T9R4;A0A7P0TAW9;A0A7P0T7V5;A0A7P0T916;A0A7P0T8N2;A0A7P0TBJ7;A0A7P0TAF3;A0A7P0TB75;A0A7P0T9K2;A0A2R8Y6H2;A0A7P0T9F1;A0A7P0T8W5;A0A2R8YFZ7;A0A…
	{"uid": "A0A7P0TAF3", "roi": 867, "R": 0.782937647, "exp_thr": 5.0, "exp_bin": false, "source": "KC2023", "note": "CL1- (mv)", "mw": null, "orig_ambiguous": false, "orig_multi_value": true, "og_uid": "Q14204;A0A2R8Y706;A0A7P0T9C4;A0A7P0TA13;A0A2R8Y5T0;A0A7P0T9R4;A0A7P0TAW9;A0A7P0T7V5;A0A7P0T916;A0A7P0T8N2;A0A7P0TBJ7;A0A7P0TAF3;A0A7P0TB75;A0A7P0T9K2;A0A2R8Y6H2;A0A7P0T9F1;A0A7P0T8W5;A0A2R8YFZ7;A0A7…
	{"uid": "A0A7P0TAF3", "roi": 2712, "R": 0.761058513, "exp_thr": 5.0, "exp_bin": false, "source": "KC2023", "note": "CL1- (mv)", "mw": null, "orig_ambiguous": false, "orig_multi_value": true, "og_uid": "Q14204;A0A2R8Y706;A0A7P0T9C4;A0A7P0TA13;A0A2R8Y5T0;A0A7P0T9R4;A0A7P0TAW9;A0A7P0T7V5;A0A7P0T916;A0A7P0T8N2;A0A7P0TBJ7;A0A7P0TAF3;A0A7P0TB75;A0A7P0T9K2;A0A2R8Y6H2;A0A7P0T9F1;A0A7P0T8W5;A0A2R8YFZ7;A0A…
	{"uid": "A0A7P0TAF3", "roi": 1999, "R": 0.669931153, "exp_thr": 5.0, "exp_bin": false, "source": "KC2023", "note": "CL1- (mv)", "mw": null, "orig_ambiguous": false, "orig_multi_value": true, "og_uid": "Q14204;A0A2R8Y706;A0A7P0T9C4;A0A7P0TA13;A0A2R8Y5T0;A0A7P0T9R4;A0A7P0TAW9;A0A7P0T7V5;A0A7P0T916;A0A7P0T8N2;A0A7P0TBJ7;A0A7P0TAF3;A0A7P0TB75;A0A7P0T9K2;A0A2R8Y6H2;A0A7P0T9F1;A0A7P0T8W5;A0A2R8YFZ7;A0A…
	{"uid": "A0A7P0TB75", "roi": 633, "R": 1.28734136, "exp_thr": 5.0, "exp_bin": false, "source": "KC2023", "note": "CL1- (mv)", "mw": null, "orig_ambiguous": false, "orig_multi_value": true, "og_uid": "Q14204;A0A2R8Y706;A0A7P0T9C4;A0A7P0TA13;A0A2R8Y5T0;A0A7P0T9R4;A0A7P0TAW9;A0A7P0T7V5;A0A7P0T916;A0A7P0T8N2;A0A7P0TBJ7;A0A7P0TAF3;A0A7P0TB75;A0A7P0T9K2;A0A2R8Y6H2;A0A7P0T9F1;A0A7P0T8W5;A0A2R8YFZ7;A0A7P…
	{"uid": "A0A7P0TB75", "roi": 2639, "R": 0.797693757, "exp_thr": 5.0, "exp_bin": false, "source": "KC2023", "note": "CL1- (mv)", "mw": null, "orig_ambiguous": false, "orig_multi_value": true, "og_uid": "Q14204;A0A2R8Y706;A0A7P0T9C4;A0A7P0TA13;A0A2R8Y5T0;A0A7P0T9R4;A0A7P0TAW9;A0A7P0T7V5;A0A7P0T916;A0A7P0T8N2;A0A7P0TBJ7;A0A7P0TAF3;A0A7P0TB75;A0A7P0T9K2;A0A2R8Y6H2;A0A7P0T9F1;A0A7P0T8W5;A0A2R8YFZ7;A0A…
	{"uid": "A0A7P0TB75", "roi": 867, "R": 0.782937647, "exp_thr": 5.0, "exp_bin": false, "source": "KC2023", "note": "CL1- (mv)", "mw": null, "orig_ambiguous": false, "orig_multi_value": true, "og_uid": "Q14204;A0A2R8Y706;A0A7P0T9C4;A0A7P0TA13;A0A2R8Y5T0;A0A7P0T9R4;A0A7P0TAW9;A0A7P0T7V5;A0A7P0T916;A0A7P0T8N2;A0A7P0TBJ7;A0A7P0TAF3;A0A7P0TB75;A0A7P0T9K2;A0A2R8Y6H2;A0A7P0T9F1;A0A7P0T8W5;A0A2R8YFZ7;A0A7…
	{"uid": "A0A7P0TB75", "roi": 2712, "R": 0.761058513, "exp_thr": 5.0, "exp_bin": false, "source": "KC2023", "note": "CL1- (mv)", "mw": null, "orig_ambiguous": false, "orig_multi_value": true, "og_uid": "Q14204;A0A2R8Y706;A0A7P0T9C4;A0A7P0TA13;A0A2R8Y5T0;A0A7P0T9R4;A0A7P0TAW9;A0A7P0T7V5;A0A7P0T916;A0A7P0T8N2;A0A7P0TBJ7;A0A7P0TAF3;A0A7P0TB75;A0A7P0T9K2;A0A2R8Y6H2;A0A7P0T9F1;A0A7P0T8W5;A0A2R8YFZ7;A0A…
	{"uid": "A0A7P0TB75", "roi": 1999, "R": 0.669931153, "exp_thr": 5.0, "exp_bin": false, "source": "KC2023", "note": "CL1- (mv)", "mw": null, "orig_ambiguous": false, "orig_multi_value": true, "og_uid": "Q14204;A0A2R8Y706;A0A7P0T9C4;A0A7P0TA13;A0A2R8Y5T0;A0A7P0T9R4;A0A7P0TAW9;A0A7P0T7V5;A0A7P0T916;A0A7P0T8N2;A0A7P0TBJ7;A0A7P0TAF3;A0A7P0TB75;A0A7P0T9K2;A0A2R8Y6H2;A0A7P0T9F1;A0A7P0T8W5;A0A2R8YFZ7;A0A…
	{"uid": "A0A7P0T9K2", "roi": 633, "R": 1.28734136, "exp_thr": 5.0, "exp_bin": false, "source": "KC2023", "note": "CL1- (mv)", "mw": null, "orig_ambiguous": false, "orig_multi_value": true, "og_uid": "Q14204;A0A2R8Y706;A0A7P0T9C4;A0A7P0TA13;A0A2R8Y5T0;A0A7P0T9R4;A0A7P0TAW9;A0A7P0T7V5;A0A7P0T916;A0A7P0T8N2;A0A7P0TBJ7;A0A7P0TAF3;A0A7P0TB75;A0A7P0T9K2;A0A2R8Y6H2;A0A7P0T9F1;A0A7P0T8W5;A0A2R8YFZ7;A0A7P…
	{"uid": "A0A7P0T9K2", "roi": 2639, "R": 0.797693757, "exp_thr": 5.0, "exp_bin": false, "source": "KC2023", "note": "CL1- (mv)", "mw": null, "orig_ambiguous": false, "orig_multi_value": true, "og_uid": "Q14204;A0A2R8Y706;A0A7P0T9C4;A0A7P0TA13;A0A2R8Y5T0;A0A7P0T9R4;A0A7P0TAW9;A0A7P0T7V5;A0A7P0T916;A0A7P0T8N2;A0A7P0TBJ7;A0A7P0TAF3;A0A7P0TB75;A0A7P0T9K2;A0A2R8Y6H2;A0A7P0T9F1;A0A7P0T8W5;A0A2R8YFZ7;A0A…
	{"uid": "A0A7P0T9K2", "roi": 867, "R": 0.782937647, "exp_thr": 5.0, "exp_bin": false, "source": "KC2023", "note": "CL1- (mv)", "mw": null, "orig_ambiguous": false, "orig_multi_value": true, "og_uid": "Q14204;A0A2R8Y706;A0A7P0T9C4;A0A7P0TA13;A0A2R8Y5T0;A0A7P0T9R4;A0A7P0TAW9;A0A7P0T7V5;A0A7P0T916;A0A7P0T8N2;A0A7P0TBJ7;A0A7P0TAF3;A0A7P0TB75;A0A7P0T9K2;A0A2R8Y6H2;A0A7P0T9F1;A0A7P0T8W5;A0A2R8YFZ7;A0A7…
	{"uid": "A0A7P0T9K2", "roi": 2712, "R": 0.761058513, "exp_thr": 5.0, "exp_bin": false, "source": "KC2023", "note": "CL1- (mv)", "mw": null, "orig_ambiguous": false, "orig_multi_value": true, "og_uid": "Q14204;A0A2R8Y706;A0A7P0T9C4;A0A7P0TA13;A0A2R8Y5T0;A0A7P0T9R4;A0A7P0TAW9;A0A7P0T7V5;A0A7P0T916;A0A7P0T8N2;A0A7P0TBJ7;A0A7P0TAF3;A0A7P0TB75;A0A7P0T9K2;A0A2R8Y6H2;A0A7P0T9F1;A0A7P0T8W5;A0A2R8YFZ7;A0A…
	{"uid": "A0A7P0T9K2", "roi": 1999, "R": 0.669931153, "exp_thr": 5.0, "exp_bin": false, "source": "KC2023", "note": "CL1- (mv)", "mw": null, "orig_ambiguous": false, "orig_multi_value": true, "og_uid": "Q14204;A0A2R8Y706;A0A7P0T9C4;A0A7P0TA13;A0A2R8Y5T0;A0A7P0T9R4;A0A7P0TAW9;A0A7P0T7V5;A0A7P0T916;A0A7P0T8N2;A0A7P0TBJ7;A0A7P0TAF3;A0A7P0TB75;A0A7P0T9K2;A0A2R8Y6H2;A0A7P0T9F1;A0A7P0T8W5;A0A2R8YFZ7;A0A…
	{"uid": "A0A2R8Y6H2", "roi": 633, "R": 1.28734136, "exp_thr": 5.0, "exp_bin": false, "source": "KC2023", "note": "CL1- (mv)", "mw": null, "orig_ambiguous": false, "orig_multi_value": true, "og_uid": "Q14204;A0A2R8Y706;A0A7P0T9C4;A0A7P0TA13;A0A2R8Y5T0;A0A7P0T9R4;A0A7P0TAW9;A0A7P0T7V5;A0A7P0T916;A0A7P0T8N2;A0A7P0TBJ7;A0A7P0TAF3;A0A7P0TB75;A0A7P0T9K2;A0A2R8Y6H2;A0A7P0T9F1;A0A7P0T8W5;A0A2R8YFZ7;A0A7P…
	{"uid": "A0A2R8Y6H2", "roi": 2639, "R": 0.797693757, "exp_thr": 5.0, "exp_bin": false, "source": "KC2023", "note": "CL1- (mv)", "mw": null, "orig_ambiguous": false, "orig_multi_value": true, "og_uid": "Q14204;A0A2R8Y706;A0A7P0T9C4;A0A7P0TA13;A0A2R8Y5T0;A0A7P0T9R4;A0A7P0TAW9;A0A7P0T7V5;A0A7P0T916;A0A7P0T8N2;A0A7P0TBJ7;A0A7P0TAF3;A0A7P0TB75;A0A7P0T9K2;A0A2R8Y6H2;A0A7P0T9F1;A0A7P0T8W5;A0A2R8YFZ7;A0A…
	{"uid": "A0A2R8Y6H2", "roi": 867, "R": 0.782937647, "exp_thr": 5.0, "exp_bin": false, "source": "KC2023", "note": "CL1- (mv)", "mw": null, "orig_ambiguous": false, "orig_multi_value": true, "og_uid": "Q14204;A0A2R8Y706;A0A7P0T9C4;A0A7P0TA13;A0A2R8Y5T0;A0A7P0T9R4;A0A7P0TAW9;A0A7P0T7V5;A0A7P0T916;A0A7P0T8N2;A0A7P0TBJ7;A0A7P0TAF3;A0A7P0TB75;A0A7P0T9K2;A0A2R8Y6H2;A0A7P0T9F1;A0A7P0T8W5;A0A2R8YFZ7;A0A7…
	{"uid": "A0A2R8Y6H2", "roi": 2712, "R": 0.761058513, "exp_thr": 5.0, "exp_bin": false, "source": "KC2023", "note": "CL1- (mv)", "mw": null, "orig_ambiguous": false, "orig_multi_value": true, "og_uid": "Q14204;A0A2R8Y706;A0A7P0T9C4;A0A7P0TA13;A0A2R8Y5T0;A0A7P0T9R4;A0A7P0TAW9;A0A7P0T7V5;A0A7P0T916;A0A7P0T8N2;A0A7P0TBJ7;A0A7P0TAF3;A0A7P0TB75;A0A7P0T9K2;A0A2R8Y6H2;A0A7P0T9F1;A0A7P0T8W5;A0A2R8YFZ7;A0A…
	{"uid": "A0A2R8Y6H2", "roi": 1999, "R": 0.669931153, "exp_thr": 5.0, "exp_bin": false, "source": "KC2023", "note": "CL1- (mv)", "mw": null, "orig_ambiguous": false, "orig_multi_value": true, "og_uid": "Q14204;A0A2R8Y706;A0A7P0T9C4;A0A7P0TA13;A0A2R8Y5T0;A0A7P0T9R4;A0A7P0TAW9;A0A7P0T7V5;A0A7P0T916;A0A7P0T8N2;A0A7P0TBJ7;A0A7P0TAF3;A0A7P0TB75;A0A7P0T9K2;A0A2R8Y6H2;A0A7P0T9F1;A0A7P0T8W5;A0A2R8YFZ7;A0A…
	{"uid": "A0A7P0T9F1", "roi": 633, "R": 1.28734136, "exp_thr": 5.0, "exp_bin": false, "source": "KC2023", "note": "CL1- (mv)", "mw": null, "orig_ambiguous": false, "orig_multi_value": true, "og_uid": "Q14204;A0A2R8Y706;A0A7P0T9C4;A0A7P0TA13;A0A2R8Y5T0;A0A7P0T9R4;A0A7P0TAW9;A0A7P0T7V5;A0A7P0T916;A0A7P0T8N2;A0A7P0TBJ7;A0A7P0TAF3;A0A7P0TB75;A0A7P0T9K2;A0A2R8Y6H2;A0A7P0T9F1;A0A7P0T8W5;A0A2R8YFZ7;A0A7P…
	{"uid": "A0A7P0T9F1", "roi": 2639, "R": 0.797693757, "exp_thr": 5.0, "exp_bin": false, "source": "KC2023", "note": "CL1- (mv)", "mw": null, "orig_ambiguous": false, "orig_multi_value": true, "og_uid": "Q14204;A0A2R8Y706;A0A7P0T9C4;A0A7P0TA13;A0A2R8Y5T0;A0A7P0T9R4;A0A7P0TAW9;A0A7P0T7V5;A0A7P0T916;A0A7P0T8N2;A0A7P0TBJ7;A0A7P0TAF3;A0A7P0TB75;A0A7P0T9K2;A0A2R8Y6H2;A0A7P0T9F1;A0A7P0T8W5;A0A2R8YFZ7;A0A…
	{"uid": "A0A7P0T9F1", "roi": 867, "R": 0.782937647, "exp_thr": 5.0, "exp_bin": false, "source": "KC2023", "note": "CL1- (mv)", "mw": null, "orig_ambiguous": false, "orig_multi_value": true, "og_uid": "Q14204;A0A2R8Y706;A0A7P0T9C4;A0A7P0TA13;A0A2R8Y5T0;A0A7P0T9R4;A0A7P0TAW9;A0A7P0T7V5;A0A7P0T916;A0A7P0T8N2;A0A7P0TBJ7;A0A7P0TAF3;A0A7P0TB75;A0A7P0T9K2;A0A2R8Y6H2;A0A7P0T9F1;A0A7P0T8W5;A0A2R8YFZ7;A0A7…
	{"uid": "A0A7P0T9F1", "roi": 2712, "R": 0.761058513, "exp_thr": 5.0, "exp_bin": false, "source": "KC2023", "note": "CL1- (mv)", "mw": null, "orig_ambiguous": false, "orig_multi_value": true, "og_uid": "Q14204;A0A2R8Y706;A0A7P0T9C4;A0A7P0TA13;A0A2R8Y5T0;A0A7P0T9R4;A0A7P0TAW9;A0A7P0T7V5;A0A7P0T916;A0A7P0T8N2;A0A7P0TBJ7;A0A7P0TAF3;A0A7P0TB75;A0A7P0T9K2;A0A2R8Y6H2;A0A7P0T9F1;A0A7P0T8W5;A0A2R8YFZ7;A0A…
	{"uid": "A0A7P0T9F1", "roi": 1999, "R": 0.669931153, "exp_thr": 5.0, "exp_bin": false, "source": "KC2023", "note": "CL1- (mv)", "mw": null, "orig_ambiguous": false, "orig_multi_value": true, "og_uid": "Q14204;A0A2R8Y706;A0A7P0T9C4;A0A7P0TA13;A0A2R8Y5T0;A0A7P0T9R4;A0A7P0TAW9;A0A7P0T7V5;A0A7P0T916;A0A7P0T8N2;A0A7P0TBJ7;A0A7P0TAF3;A0A7P0TB75;A0A7P0T9K2;A0A2R8Y6H2;A0A7P0T9F1;A0A7P0T8W5;A0A2R8YFZ7;A0A…
	{"uid": "A0A7P0T8W5", "roi": 633, "R": 1.28734136, "exp_thr": 5.0, "exp_bin": false, "source": "KC2023", "note": "CL1- (mv)", "mw": null, "orig_ambiguous": false, "orig_multi_value": true, "og_uid": "Q14204;A0A2R8Y706;A0A7P0T9C4;A0A7P0TA13;A0A2R8Y5T0;A0A7P0T9R4;A0A7P0TAW9;A0A7P0T7V5;A0A7P0T916;A0A7P0T8N2;A0A7P0TBJ7;A0A7P0TAF3;A0A7P0TB75;A0A7P0T9K2;A0A2R8Y6H2;A0A7P0T9F1;A0A7P0T8W5;A0A2R8YFZ7;A0A7P…
	{"uid": "A0A7P0T8W5", "roi": 2639, "R": 0.797693757, "exp_thr": 5.0, "exp_bin": false, "source": "KC2023", "note": "CL1- (mv)", "mw": null, "orig_ambiguous": false, "orig_multi_value": true, "og_uid": "Q14204;A0A2R8Y706;A0A7P0T9C4;A0A7P0TA13;A0A2R8Y5T0;A0A7P0T9R4;A0A7P0TAW9;A0A7P0T7V5;A0A7P0T916;A0A7P0T8N2;A0A7P0TBJ7;A0A7P0TAF3;A0A7P0TB75;A0A7P0T9K2;A0A2R8Y6H2;A0A7P0T9F1;A0A7P0T8W5;A0A2R8YFZ7;A0A…
	{"uid": "A0A7P0T8W5", "roi": 867, "R": 0.782937647, "exp_thr": 5.0, "exp_bin": false, "source": "KC2023", "note": "CL1- (mv)", "mw": null, "orig_ambiguous": false, "orig_multi_value": true, "og_uid": "Q14204;A0A2R8Y706;A0A7P0T9C4;A0A7P0TA13;A0A2R8Y5T0;A0A7P0T9R4;A0A7P0TAW9;A0A7P0T7V5;A0A7P0T916;A0A7P0T8N2;A0A7P0TBJ7;A0A7P0TAF3;A0A7P0TB75;A0A7P0T9K2;A0A2R8Y6H2;A0A7P0T9F1;A0A7P0T8W5;A0A2R8YFZ7;A0A7…
	{"uid": "A0A7P0T8W5", "roi": 2712, "R": 0.761058513, "exp_thr": 5.0, "exp_bin": false, "source": "KC2023", "note": "CL1- (mv)", "mw": null, "orig_ambiguous": false, "orig_multi_value": true, "og_uid": "Q14204;A0A2R8Y706;A0A7P0T9C4;A0A7P0TA13;A0A2R8Y5T0;A0A7P0T9R4;A0A7P0TAW9;A0A7P0T7V5;A0A7P0T916;A0A7P0T8N2;A0A7P0TBJ7;A0A7P0TAF3;A0A7P0TB75;A0A7P0T9K2;A0A2R8Y6H2;A0A7P0T9F1;A0A7P0T8W5;A0A2R8YFZ7;A0A…
	{"uid": "A0A7P0T8W5", "roi": 1999, "R": 0.669931153, "exp_thr": 5.0, "exp_bin": false, "source": "KC2023", "note": "CL1- (mv)", "mw": null, "orig_ambiguous": false, "orig_multi_value": true, "og_uid": "Q14204;A0A2R8Y706;A0A7P0T9C4;A0A7P0TA13;A0A2R8Y5T0;A0A7P0T9R4;A0A7P0TAW9;A0A7P0T7V5;A0A7P0T916;A0A7P0T8N2;A0A7P0TBJ7;A0A7P0TAF3;A0A7P0TB75;A0A7P0T9K2;A0A2R8Y6H2;A0A7P0T9F1;A0A7P0T8W5;A0A2R8YFZ7;A0A…
	{"uid": "A0A2R8YFZ7", "roi": 633, "R": 1.28734136, "exp_thr": 5.0, "exp_bin": false, "source": "KC2023", "note": "CL1- (mv)", "mw": null, "orig_ambiguous": false, "orig_multi_value": true, "og_uid": "Q14204;A0A2R8Y706;A0A7P0T9C4;A0A7P0TA13;A0A2R8Y5T0;A0A7P0T9R4;A0A7P0TAW9;A0A7P0T7V5;A0A7P0T916;A0A7P0T8N2;A0A7P0TBJ7;A0A7P0TAF3;A0A7P0TB75;A0A7P0T9K2;A0A2R8Y6H2;A0A7P0T9F1;A0A7P0T8W5;A0A2R8YFZ7;A0A7P…
	{"uid": "A0A2R8YFZ7", "roi": 2639, "R": 0.797693757, "exp_thr": 5.0, "exp_bin": false, "source": "KC2023", "note": "CL1- (mv)", "mw": null, "orig_ambiguous": false, "orig_multi_value": true, "og_uid": "Q14204;A0A2R8Y706;A0A7P0T9C4;A0A7P0TA13;A0A2R8Y5T0;A0A7P0T9R4;A0A7P0TAW9;A0A7P0T7V5;A0A7P0T916;A0A7P0T8N2;A0A7P0TBJ7;A0A7P0TAF3;A0A7P0TB75;A0A7P0T9K2;A0A2R8Y6H2;A0A7P0T9F1;A0A7P0T8W5;A0A2R8YFZ7;A0A…
	{"uid": "A0A2R8YFZ7", "roi": 867, "R": 0.782937647, "exp_thr": 5.0, "exp_bin": false, "source": "KC2023", "note": "CL1- (mv)", "mw": null, "orig_ambiguous": false, "orig_multi_value": true, "og_uid": "Q14204;A0A2R8Y706;A0A7P0T9C4;A0A7P0TA13;A0A2R8Y5T0;A0A7P0T9R4;A0A7P0TAW9;A0A7P0T7V5;A0A7P0T916;A0A7P0T8N2;A0A7P0TBJ7;A0A7P0TAF3;A0A7P0TB75;A0A7P0T9K2;A0A2R8Y6H2;A0A7P0T9F1;A0A7P0T8W5;A0A2R8YFZ7;A0A7…
	{"uid": "A0A2R8YFZ7", "roi": 2712, "R": 0.761058513, "exp_thr": 5.0, "exp_bin": false, "source": "KC2023", "note": "CL1- (mv)", "mw": null, "orig_ambiguous": false, "orig_multi_value": true, "og_uid": "Q14204;A0A2R8Y706;A0A7P0T9C4;A0A7P0TA13;A0A2R8Y5T0;A0A7P0T9R4;A0A7P0TAW9;A0A7P0T7V5;A0A7P0T916;A0A7P0T8N2;A0A7P0TBJ7;A0A7P0TAF3;A0A7P0TB75;A0A7P0T9K2;A0A2R8Y6H2;A0A7P0T9F1;A0A7P0T8W5;A0A2R8YFZ7;A0A…
	{"uid": "A0A2R8YFZ7", "roi": 1999, "R": 0.669931153, "exp_thr": 5.0, "exp_bin": false, "source": "KC2023", "note": "CL1- (mv)", "mw": null, "orig_ambiguous": false, "orig_multi_value": true, "og_uid": "Q14204;A0A2R8Y706;A0A7P0T9C4;A0A7P0TA13;A0A2R8Y5T0;A0A7P0T9R4;A0A7P0TAW9;A0A7P0T7V5;A0A7P0T916;A0A7P0T8N2;A0A7P0TBJ7;A0A7P0TAF3;A0A7P0TB75;A0A7P0T9K2;A0A2R8Y6H2;A0A7P0T9F1;A0A7P0T8W5;A0A2R8YFZ7;A0A…
	{"uid": "A0A7P0TAM4", "roi": 633, "R": 1.28734136, "exp_thr": 5.0, "exp_bin": false, "source": "KC2023", "note": "CL1- (mv)", "mw": null, "orig_ambiguous": false, "orig_multi_value": true, "og_uid": "Q14204;A0A2R8Y706;A0A7P0T9C4;A0A7P0TA13;A0A2R8Y5T0;A0A7P0T9R4;A0A7P0TAW9;A0A7P0T7V5;A0A7P0T916;A0A7P0T8N2;A0A7P0TBJ7;A0A7P0TAF3;A0A7P0TB75;A0A7P0T9K2;A0A2R8Y6H2;A0A7P0T9F1;A0A7P0T8W5;A0A2R8YFZ7;A0A7P…
	{"uid": "A0A7P0TAM4", "roi": 2639, "R": 0.797693757, "exp_thr": 5.0, "exp_bin": false, "source": "KC2023", "note": "CL1- (mv)", "mw": null, "orig_ambiguous": false, "orig_multi_value": true, "og_uid": "Q14204;A0A2R8Y706;A0A7P0T9C4;A0A7P0TA13;A0A2R8Y5T0;A0A7P0T9R4;A0A7P0TAW9;A0A7P0T7V5;A0A7P0T916;A0A7P0T8N2;A0A7P0TBJ7;A0A7P0TAF3;A0A7P0TB75;A0A7P0T9K2;A0A2R8Y6H2;A0A7P0T9F1;A0A7P0T8W5;A0A2R8YFZ7;A0A…
	{"uid": "A0A7P0TAM4", "roi": 867, "R": 0.782937647, "exp_thr": 5.0, "exp_bin": false, "source": "KC2023", "note": "CL1- (mv)", "mw": null, "orig_ambiguous": false, "orig_multi_value": true, "og_uid": "Q14204;A0A2R8Y706;A0A7P0T9C4;A0A7P0TA13;A0A2R8Y5T0;A0A7P0T9R4;A0A7P0TAW9;A0A7P0T7V5;A0A7P0T916;A0A7P0T8N2;A0A7P0TBJ7;A0A7P0TAF3;A0A7P0TB75;A0A7P0T9K2;A0A2R8Y6H2;A0A7P0T9F1;A0A7P0T8W5;A0A2R8YFZ7;A0A7…
	{"uid": "A0A7P0TAM4", "roi": 2712, "R": 0.761058513, "exp_thr": 5.0, "exp_bin": false, "source": "KC2023", "note": "CL1- (mv)", "mw": null, "orig_ambiguous": false, "orig_multi_value": true, "og_uid": "Q14204;A0A2R8Y706;A0A7P0T9C4;A0A7P0TA13;A0A2R8Y5T0;A0A7P0T9R4;A0A7P0TAW9;A0A7P0T7V5;A0A7P0T916;A0A7P0T8N2;A0A7P0TBJ7;A0A7P0TAF3;A0A7P0TB75;A0A7P0T9K2;A0A2R8Y6H2;A0A7P0T9F1;A0A7P0T8W5;A0A2R8YFZ7;A0A…
	{"uid": "A0A7P0TAM4", "roi": 1999, "R": 0.669931153, "exp_thr": 5.0, "exp_bin": false, "source": "KC2023", "note": "CL1- (mv)", "mw": null, "orig_ambiguous": false, "orig_multi_value": true, "og_uid": "Q14204;A0A2R8Y706;A0A7P0T9C4;A0A7P0TA13;A0A2R8Y5T0;A0A7P0T9R4;A0A7P0TAW9;A0A7P0T7V5;A0A7P0T916;A0A7P0T8N2;A0A7P0TBJ7;A0A7P0TAF3;A0A7P0TB75;A0A7P0T9K2;A0A2R8Y6H2;A0A7P0T9F1;A0A7P0T8W5;A0A2R8YFZ7;A0A…
	{"uid": "A0A7P0T825", "roi": 633, "R": 1.28734136, "exp_thr": 5.0, "exp_bin": false, "source": "KC2023", "note": "CL1- (mv)", "mw": null, "orig_ambiguous": false, "orig_multi_value": true, "og_uid": "Q14204;A0A2R8Y706;A0A7P0T9C4;A0A7P0TA13;A0A2R8Y5T0;A0A7P0T9R4;A0A7P0TAW9;A0A7P0T7V5;A0A7P0T916;A0A7P0T8N2;A0A7P0TBJ7;A0A7P0TAF3;A0A7P0TB75;A0A7P0T9K2;A0A2R8Y6H2;A0A7P0T9F1;A0A7P0T8W5;A0A2R8YFZ7;A0A7P…
	{"uid": "A0A7P0T825", "roi": 2639, "R": 0.797693757, "exp_thr": 5.0, "exp_bin": false, "source": "KC2023", "note": "CL1- (mv)", "mw": null, "orig_ambiguous": false, "orig_multi_value": true, "og_uid": "Q14204;A0A2R8Y706;A0A7P0T9C4;A0A7P0TA13;A0A2R8Y5T0;A0A7P0T9R4;A0A7P0TAW9;A0A7P0T7V5;A0A7P0T916;A0A7P0T8N2;A0A7P0TBJ7;A0A7P0TAF3;A0A7P0TB75;A0A7P0T9K2;A0A2R8Y6H2;A0A7P0T9F1;A0A7P0T8W5;A0A2R8YFZ7;A0A…
	{"uid": "A0A7P0T825", "roi": 867, "R": 0.782937647, "exp_thr": 5.0, "exp_bin": false, "source": "KC2023", "note": "CL1- (mv)", "mw": null, "orig_ambiguous": false, "orig_multi_value": true, "og_uid": "Q14204;A0A2R8Y706;A0A7P0T9C4;A0A7P0TA13;A0A2R8Y5T0;A0A7P0T9R4;A0A7P0TAW9;A0A7P0T7V5;A0A7P0T916;A0A7P0T8N2;A0A7P0TBJ7;A0A7P0TAF3;A0A7P0TB75;A0A7P0T9K2;A0A2R8Y6H2;A0A7P0T9F1;A0A7P0T8W5;A0A2R8YFZ7;A0A7…
	{"uid": "A0A7P0T825", "roi": 2712, "R": 0.761058513, "exp_thr": 5.0, "exp_bin": false, "source": "KC2023", "note": "CL1- (mv)", "mw": null, "orig_ambiguous": false, "orig_multi_value": true, "og_uid": "Q14204;A0A2R8Y706;A0A7P0T9C4;A0A7P0TA13;A0A2R8Y5T0;A0A7P0T9R4;A0A7P0TAW9;A0A7P0T7V5;A0A7P0T916;A0A7P0T8N2;A0A7P0TBJ7;A0A7P0TAF3;A0A7P0TB75;A0A7P0T9K2;A0A2R8Y6H2;A0A7P0T9F1;A0A7P0T8W5;A0A2R8YFZ7;A0A…
	{"uid": "A0A7P0T825", "roi": 1999, "R": 0.669931153, "exp_thr": 5.0, "exp_bin": false, "source": "KC2023", "note": "CL1- (mv)", "mw": null, "orig_ambiguous": false, "orig_multi_value": true, "og_uid": "Q14204;A0A2R8Y706;A0A7P0T9C4;A0A7P0TA13;A0A2R8Y5T0;A0A7P0T9R4;A0A7P0TAW9;A0A7P0T7V5;A0A7P0T916;A0A7P0T8N2;A0A7P0TBJ7;A0A7P0TAF3;A0A7P0TB75;A0A7P0T9K2;A0A2R8Y6H2;A0A7P0T9F1;A0A7P0T8W5;A0A2R8YFZ7;A0A…
	{"uid": "A0A7P0TB64", "roi": 633, "R": 1.28734136, "exp_thr": 5.0, "exp_bin": false, "source": "KC2023", "note": "CL1- (mv)", "mw": null, "orig_ambiguous": false, "orig_multi_value": true, "og_uid": "Q14204;A0A2R8Y706;A0A7P0T9C4;A0A7P0TA13;A0A2R8Y5T0;A0A7P0T9R4;A0A7P0TAW9;A0A7P0T7V5;A0A7P0T916;A0A7P0T8N2;A0A7P0TBJ7;A0A7P0TAF3;A0A7P0TB75;A0A7P0T9K2;A0A2R8Y6H2;A0A7P0T9F1;A0A7P0T8W5;A0A2R8YFZ7;A0A7P…
	{"uid": "A0A7P0TB64", "roi": 2639, "R": 0.797693757, "exp_thr": 5.0, "exp_bin": false, "source": "KC2023", "note": "CL1- (mv)", "mw": null, "orig_ambiguous": false, "orig_multi_value": true, "og_uid": "Q14204;A0A2R8Y706;A0A7P0T9C4;A0A7P0TA13;A0A2R8Y5T0;A0A7P0T9R4;A0A7P0TAW9;A0A7P0T7V5;A0A7P0T916;A0A7P0T8N2;A0A7P0TBJ7;A0A7P0TAF3;A0A7P0TB75;A0A7P0T9K2;A0A2R8Y6H2;A0A7P0T9F1;A0A7P0T8W5;A0A2R8YFZ7;A0A…
	{"uid": "A0A7P0TB64", "roi": 867, "R": 0.782937647, "exp_thr": 5.0, "exp_bin": false, "source": "KC2023", "note": "CL1- (mv)", "mw": null, "orig_ambiguous": false, "orig_multi_value": true, "og_uid": "Q14204;A0A2R8Y706;A0A7P0T9C4;A0A7P0TA13;A0A2R8Y5T0;A0A7P0T9R4;A0A7P0TAW9;A0A7P0T7V5;A0A7P0T916;A0A7P0T8N2;A0A7P0TBJ7;A0A7P0TAF3;A0A7P0TB75;A0A7P0T9K2;A0A2R8Y6H2;A0A7P0T9F1;A0A7P0T8W5;A0A2R8YFZ7;A0A7…
	{"uid": "A0A7P0TB64", "roi": 2712, "R": 0.761058513, "exp_thr": 5.0, "exp_bin": false, "source": "KC2023", "note": "CL1- (mv)", "mw": null, "orig_ambiguous": false, "orig_multi_value": true, "og_uid": "Q14204;A0A2R8Y706;A0A7P0T9C4;A0A7P0TA13;A0A2R8Y5T0;A0A7P0T9R4;A0A7P0TAW9;A0A7P0T7V5;A0A7P0T916;A0A7P0T8N2;A0A7P0TBJ7;A0A7P0TAF3;A0A7P0TB75;A0A7P0T9K2;A0A2R8Y6H2;A0A7P0T9F1;A0A7P0T8W5;A0A2R8YFZ7;A0A…
	{"uid": "A0A7P0TB64", "roi": 1999, "R": 0.669931153, "exp_thr": 5.0, "exp_bin": false, "source": "KC2023", "note": "CL1- (mv)", "mw": null, "orig_ambiguous": false, "orig_multi_value": true, "og_uid": "Q14204;A0A2R8Y706;A0A7P0T9C4;A0A7P0TA13;A0A2R8Y5T0;A0A7P0T9R4;A0A7P0TAW9;A0A7P0T7V5;A0A7P0T916;A0A7P0T8N2;A0A7P0TBJ7;A0A7P0TAF3;A0A7P0TB75;A0A7P0T9K2;A0A2R8Y6H2;A0A7P0T9F1;A0A7P0T8W5;A0A2R8YFZ7;A0A…
	{"uid": "A0A7P0TAV5", "roi": 633, "R": 1.28734136, "exp_thr": 5.0, "exp_bin": false, "source": "KC2023", "note": "CL1- (mv)", "mw": null, "orig_ambiguous": false, "orig_multi_value": true, "og_uid": "Q14204;A0A2R8Y706;A0A7P0T9C4;A0A7P0TA13;A0A2R8Y5T0;A0A7P0T9R4;A0A7P0TAW9;A0A7P0T7V5;A0A7P0T916;A0A7P0T8N2;A0A7P0TBJ7;A0A7P0TAF3;A0A7P0TB75;A0A7P0T9K2;A0A2R8Y6H2;A0A7P0T9F1;A0A7P0T8W5;A0A2R8YFZ7;A0A7P…
	{"uid": "A0A7P0TAV5", "roi": 2639, "R": 0.797693757, "exp_thr": 5.0, "exp_bin": false, "source": "KC2023", "note": "CL1- (mv)", "mw": null, "orig_ambiguous": false, "orig_multi_value": true, "og_uid": "Q14204;A0A2R8Y706;A0A7P0T9C4;A0A7P0TA13;A0A2R8Y5T0;A0A7P0T9R4;A0A7P0TAW9;A0A7P0T7V5;A0A7P0T916;A0A7P0T8N2;A0A7P0TBJ7;A0A7P0TAF3;A0A7P0TB75;A0A7P0T9K2;A0A2R8Y6H2;A0A7P0T9F1;A0A7P0T8W5;A0A2R8YFZ7;A0A…
	{"uid": "A0A7P0TAV5", "roi": 867, "R": 0.782937647, "exp_thr": 5.0, "exp_bin": false, "source": "KC2023", "note": "CL1- (mv)", "mw": null, "orig_ambiguous": false, "orig_multi_value": true, "og_uid": "Q14204;A0A2R8Y706;A0A7P0T9C4;A0A7P0TA13;A0A2R8Y5T0;A0A7P0T9R4;A0A7P0TAW9;A0A7P0T7V5;A0A7P0T916;A0A7P0T8N2;A0A7P0TBJ7;A0A7P0TAF3;A0A7P0TB75;A0A7P0T9K2;A0A2R8Y6H2;A0A7P0T9F1;A0A7P0T8W5;A0A2R8YFZ7;A0A7…
	{"uid": "A0A7P0TAV5", "roi": 2712, "R": 0.761058513, "exp_thr": 5.0, "exp_bin": false, "source": "KC2023", "note": "CL1- (mv)", "mw": null, "orig_ambiguous": false, "orig_multi_value": true, "og_uid": "Q14204;A0A2R8Y706;A0A7P0T9C4;A0A7P0TA13;A0A2R8Y5T0;A0A7P0T9R4;A0A7P0TAW9;A0A7P0T7V5;A0A7P0T916;A0A7P0T8N2;A0A7P0TBJ7;A0A7P0TAF3;A0A7P0TB75;A0A7P0T9K2;A0A2R8Y6H2;A0A7P0T9F1;A0A7P0T8W5;A0A2R8YFZ7;A0A…
	{"uid": "A0A7P0TAV5", "roi": 1999, "R": 0.669931153, "exp_thr": 5.0, "exp_bin": false, "source": "KC2023", "note": "CL1- (mv)", "mw": null, "orig_ambiguous": false, "orig_multi_value": true, "og_uid": "Q14204;A0A2R8Y706;A0A7P0T9C4;A0A7P0TA13;A0A2R8Y5T0;A0A7P0T9R4;A0A7P0TAW9;A0A7P0T7V5;A0A7P0T916;A0A7P0T8N2;A0A7P0TBJ7;A0A7P0TAF3;A0A7P0TB75;A0A7P0T9K2;A0A2R8Y6H2;A0A7P0T9F1;A0A7P0T8W5;A0A2R8YFZ7;A0A…
	{"uid": "A0A7P0T990", "roi": 633, "R": 1.28734136, "exp_thr": 5.0, "exp_bin": false, "source": "KC2023", "note": "CL1- (mv)", "mw": null, "orig_ambiguous": false, "orig_multi_value": true, "og_uid": "Q14204;A0A2R8Y706;A0A7P0T9C4;A0A7P0TA13;A0A2R8Y5T0;A0A7P0T9R4;A0A7P0TAW9;A0A7P0T7V5;A0A7P0T916;A0A7P0T8N2;A0A7P0TBJ7;A0A7P0TAF3;A0A7P0TB75;A0A7P0T9K2;A0A2R8Y6H2;A0A7P0T9F1;A0A7P0T8W5;A0A2R8YFZ7;A0A7P…
	{"uid": "A0A7P0T990", "roi": 2639, "R": 0.797693757, "exp_thr": 5.0, "exp_bin": false, "source": "KC2023", "note": "CL1- (mv)", "mw": null, "orig_ambiguous": false, "orig_multi_value": true, "og_uid": "Q14204;A0A2R8Y706;A0A7P0T9C4;A0A7P0TA13;A0A2R8Y5T0;A0A7P0T9R4;A0A7P0TAW9;A0A7P0T7V5;A0A7P0T916;A0A7P0T8N2;A0A7P0TBJ7;A0A7P0TAF3;A0A7P0TB75;A0A7P0T9K2;A0A2R8Y6H2;A0A7P0T9F1;A0A7P0T8W5;A0A2R8YFZ7;A0A…
	{"uid": "A0A7P0T990", "roi": 867, "R": 0.782937647, "exp_thr": 5.0, "exp_bin": false, "source": "KC2023", "note": "CL1- (mv)", "mw": null, "orig_ambiguous": false, "orig_multi_value": true, "og_uid": "Q14204;A0A2R8Y706;A0A7P0T9C4;A0A7P0TA13;A0A2R8Y5T0;A0A7P0T9R4;A0A7P0TAW9;A0A7P0T7V5;A0A7P0T916;A0A7P0T8N2;A0A7P0TBJ7;A0A7P0TAF3;A0A7P0TB75;A0A7P0T9K2;A0A2R8Y6H2;A0A7P0T9F1;A0A7P0T8W5;A0A2R8YFZ7;A0A7…
	{"uid": "A0A7P0T990", "roi": 2712, "R": 0.761058513, "exp_thr": 5.0, "exp_bin": false, "source": "KC2023", "note": "CL1- (mv)", "mw": null, "orig_ambiguous": false, "orig_multi_value": true, "og_uid": "Q14204;A0A2R8Y706;A0A7P0T9C4;A0A7P0TA13;A0A2R8Y5T0;A0A7P0T9R4;A0A7P0TAW9;A0A7P0T7V5;A0A7P0T916;A0A7P0T8N2;A0A7P0TBJ7;A0A7P0TAF3;A0A7P0TB75;A0A7P0T9K2;A0A2R8Y6H2;A0A7P0T9F1;A0A7P0T8W5;A0A2R8YFZ7;A0A…
	{"uid": "A0A7P0T990", "roi": 1999, "R": 0.669931153, "exp_thr": 5.0, "exp_bin": false, "source": "KC2023", "note": "CL1- (mv)", "mw": null, "orig_ambiguous": false, "orig_multi_value": true, "og_uid": "Q14204;A0A2R8Y706;A0A7P0T9C4;A0A7P0TA13;A0A2R8Y5T0;A0A7P0T9R4;A0A7P0TAW9;A0A7P0T7V5;A0A7P0T916;A0A7P0T8N2;A0A7P0TBJ7;A0A7P0TAF3;A0A7P0TB75;A0A7P0T9K2;A0A2R8Y6H2;A0A7P0T9F1;A0A7P0T8W5;A0A2R8YFZ7;A0A…
	{"uid": "A0A7P0T942", "roi": 633, "R": 1.28734136, "exp_thr": 5.0, "exp_bin": false, "source": "KC2023", "note": "CL1- (mv)", "mw": null, "orig_ambiguous": false, "orig_multi_value": true, "og_uid": "Q14204;A0A2R8Y706;A0A7P0T9C4;A0A7P0TA13;A0A2R8Y5T0;A0A7P0T9R4;A0A7P0TAW9;A0A7P0T7V5;A0A7P0T916;A0A7P0T8N2;A0A7P0TBJ7;A0A7P0TAF3;A0A7P0TB75;A0A7P0T9K2;A0A2R8Y6H2;A0A7P0T9F1;A0A7P0T8W5;A0A2R8YFZ7;A0A7P…
	{"uid": "A0A7P0T942", "roi": 2639, "R": 0.797693757, "exp_thr": 5.0, "exp_bin": false, "source": "KC2023", "note": "CL1- (mv)", "mw": null, "orig_ambiguous": false, "orig_multi_value": true, "og_uid": "Q14204;A0A2R8Y706;A0A7P0T9C4;A0A7P0TA13;A0A2R8Y5T0;A0A7P0T9R4;A0A7P0TAW9;A0A7P0T7V5;A0A7P0T916;A0A7P0T8N2;A0A7P0TBJ7;A0A7P0TAF3;A0A7P0TB75;A0A7P0T9K2;A0A2R8Y6H2;A0A7P0T9F1;A0A7P0T8W5;A0A2R8YFZ7;A0A…
	{"uid": "A0A7P0T942", "roi": 867, "R": 0.782937647, "exp_thr": 5.0, "exp_bin": false, "source": "KC2023", "note": "CL1- (mv)", "mw": null, "orig_ambiguous": false, "orig_multi_value": true, "og_uid": "Q14204;A0A2R8Y706;A0A7P0T9C4;A0A7P0TA13;A0A2R8Y5T0;A0A7P0T9R4;A0A7P0TAW9;A0A7P0T7V5;A0A7P0T916;A0A7P0T8N2;A0A7P0TBJ7;A0A7P0TAF3;A0A7P0TB75;A0A7P0T9K2;A0A2R8Y6H2;A0A7P0T9F1;A0A7P0T8W5;A0A2R8YFZ7;A0A7…
	{"uid": "A0A7P0T942", "roi": 2712, "R": 0.761058513, "exp_thr": 5.0, "exp_bin": false, "source": "KC2023", "note": "CL1- (mv)", "mw": null, "orig_ambiguous": false, "orig_multi_value": true, "og_uid": "Q14204;A0A2R8Y706;A0A7P0T9C4;A0A7P0TA13;A0A2R8Y5T0;A0A7P0T9R4;A0A7P0TAW9;A0A7P0T7V5;A0A7P0T916;A0A7P0T8N2;A0A7P0TBJ7;A0A7P0TAF3;A0A7P0TB75;A0A7P0T9K2;A0A2R8Y6H2;A0A7P0T9F1;A0A7P0T8W5;A0A2R8YFZ7;A0A…
	{"uid": "A0A7P0T942", "roi": 1999, "R": 0.669931153, "exp_thr": 5.0, "exp_bin": false, "source": "KC2023", "note": "CL1- (mv)", "mw": null, "orig_ambiguous": false, "orig_multi_value": true, "og_uid": "Q14204;A0A2R8Y706;A0A7P0T9C4;A0A7P0TA13;A0A2R8Y5T0;A0A7P0T9R4;A0A7P0TAW9;A0A7P0T7V5;A0A7P0T916;A0A7P0T8N2;A0A7P0TBJ7;A0A7P0TAF3;A0A7P0TB75;A0A7P0T9K2;A0A2R8Y6H2;A0A7P0T9F1;A0A7P0T8W5;A0A2R8YFZ7;A0A…
	{"uid": "A0A7P0T9C4", "roi": 633, "R": 1.28734136, "exp_thr": 5.0, "exp_bin": false, "source": "KC2023", "note": "CL1- (mv)", "mw": null, "orig_ambiguous": false, "orig_multi_value": true, "og_uid": "Q14204;A0A2R8Y706;A0A7P0T9C4;A0A7P0TA13;A0A2R8Y5T0;A0A7P0T9R4;A0A7P0TAW9;A0A7P0T7V5;A0A7P0T916;A0A7P0T8N2;A0A7P0TBJ7;A0A7P0TAF3;A0A7P0TB75;A0A7P0T9K2;A0A2R8Y6H2;A0A7P0T9F1;A0A7P0T8W5;A0A2R8YFZ7;A0A7P…
	{"uid": "A0A7P0T9C4", "roi": 2639, "R": 0.797693757, "exp_thr": 5.0, "exp_bin": false, "source": "KC2023", "note": "CL1- (mv)", "mw": null, "orig_ambiguous": false, "orig_multi_value": true, "og_uid": "Q14204;A0A2R8Y706;A0A7P0T9C4;A0A7P0TA13;A0A2R8Y5T0;A0A7P0T9R4;A0A7P0TAW9;A0A7P0T7V5;A0A7P0T916;A0A7P0T8N2;A0A7P0TBJ7;A0A7P0TAF3;A0A7P0TB75;A0A7P0T9K2;A0A2R8Y6H2;A0A7P0T9F1;A0A7P0T8W5;A0A2R8YFZ7;A0A…
	{"uid": "A0A7P0T9C4", "roi": 867, "R": 0.782937647, "exp_thr": 5.0, "exp_bin": false, "source": "KC2023", "note": "CL1- (mv)", "mw": null, "orig_ambiguous": false, "orig_multi_value": true, "og_uid": "Q14204;A0A2R8Y706;A0A7P0T9C4;A0A7P0TA13;A0A2R8Y5T0;A0A7P0T9R4;A0A7P0TAW9;A0A7P0T7V5;A0A7P0T916;A0A7P0T8N2;A0A7P0TBJ7;A0A7P0TAF3;A0A7P0TB75;A0A7P0T9K2;A0A2R8Y6H2;A0A7P0T9F1;A0A7P0T8W5;A0A2R8YFZ7;A0A7…
	{"uid": "A0A7P0T9C4", "roi": 2712, "R": 0.761058513, "exp_thr": 5.0, "exp_bin": false, "source": "KC2023", "note": "CL1- (mv)", "mw": null, "orig_ambiguous": false, "orig_multi_value": true, "og_uid": "Q14204;A0A2R8Y706;A0A7P0T9C4;A0A7P0TA13;A0A2R8Y5T0;A0A7P0T9R4;A0A7P0TAW9;A0A7P0T7V5;A0A7P0T916;A0A7P0T8N2;A0A7P0TBJ7;A0A7P0TAF3;A0A7P0TB75;A0A7P0T9K2;A0A2R8Y6H2;A0A7P0T9F1;A0A7P0T8W5;A0A2R8YFZ7;A0A…
	{"uid": "A0A7P0T9C4", "roi": 1999, "R": 0.669931153, "exp_thr": 5.0, "exp_bin": false, "source": "KC2023", "note": "CL1- (mv)", "mw": null, "orig_ambiguous": false, "orig_multi_value": true, "og_uid": "Q14204;A0A2R8Y706;A0A7P0T9C4;A0A7P0TA13;A0A2R8Y5T0;A0A7P0T9R4;A0A7P0TAW9;A0A7P0T7V5;A0A7P0T916;A0A7P0T8N2;A0A7P0TBJ7;A0A7P0TAF3;A0A7P0TB75;A0A7P0T9K2;A0A2R8Y6H2;A0A7P0T9F1;A0A7P0T8W5;A0A2R8YFZ7;A0A…
	{"uid": "A0A7P0T9S3", "roi": 633, "R": 1.28734136, "exp_thr": 5.0, "exp_bin": false, "source": "KC2023", "note": "CL1- (mv)", "mw": null, "orig_ambiguous": false, "orig_multi_value": true, "og_uid": "Q14204;A0A2R8Y706;A0A7P0T9C4;A0A7P0TA13;A0A2R8Y5T0;A0A7P0T9R4;A0A7P0TAW9;A0A7P0T7V5;A0A7P0T916;A0A7P0T8N2;A0A7P0TBJ7;A0A7P0TAF3;A0A7P0TB75;A0A7P0T9K2;A0A2R8Y6H2;A0A7P0T9F1;A0A7P0T8W5;A0A2R8YFZ7;A0A7P…
	{"uid": "A0A7P0T9S3", "roi": 867, "R": 0.782937647, "exp_thr": 5.0, "exp_bin": false, "source": "KC2023", "note": "CL1- (mv)", "mw": null, "orig_ambiguous": false, "orig_multi_value": true, "og_uid": "Q14204;A0A2R8Y706;A0A7P0T9C4;A0A7P0TA13;A0A2R8Y5T0;A0A7P0T9R4;A0A7P0TAW9;A0A7P0T7V5;A0A7P0T916;A0A7P0T8N2;A0A7P0TBJ7;A0A7P0TAF3;A0A7P0TB75;A0A7P0T9K2;A0A2R8Y6H2;A0A7P0T9F1;A0A7P0T8W5;A0A2R8YFZ7;A0A7…
	{"uid": "A0A7P0T9S3", "roi": 1999, "R": 0.669931153, "exp_thr": 5.0, "exp_bin": false, "source": "KC2023", "note": "CL1- (mv)", "mw": null, "orig_ambiguous": false, "orig_multi_value": true, "og_uid": "Q14204;A0A2R8Y706;A0A7P0T9C4;A0A7P0TA13;A0A2R8Y5T0;A0A7P0T9R4;A0A7P0TAW9;A0A7P0T7V5;A0A7P0T916;A0A7P0T8N2;A0A7P0TBJ7;A0A7P0TAF3;A0A7P0TB75;A0A7P0T9K2;A0A2R8Y6H2;A0A7P0T9F1;A0A7P0T8W5;A0A2R8YFZ7;A0A…
	{"uid": "A0A7P0T934", "roi": 633, "R": 1.28734136, "exp_thr": 5.0, "exp_bin": false, "source": "KC2023", "note": "CL1- (mv)", "mw": null, "orig_ambiguous": false, "orig_multi_value": true, "og_uid": "Q14204;A0A2R8Y706;A0A7P0T9C4;A0A7P0TA13;A0A2R8Y5T0;A0A7P0T9R4;A0A7P0TAW9;A0A7P0T7V5;A0A7P0T916;A0A7P0T8N2;A0A7P0TBJ7;A0A7P0TAF3;A0A7P0TB75;A0A7P0T9K2;A0A2R8Y6H2;A0A7P0T9F1;A0A7P0T8W5;A0A2R8YFZ7;A0A7P…
	{"uid": "A0A7P0T934", "roi": 867, "R": 0.782937647, "exp_thr": 5.0, "exp_bin": false, "source": "KC2023", "note": "CL1- (mv)", "mw": null, "orig_ambiguous": false, "orig_multi_value": true, "og_uid": "Q14204;A0A2R8Y706;A0A7P0T9C4;A0A7P0TA13;A0A2R8Y5T0;A0A7P0T9R4;A0A7P0TAW9;A0A7P0T7V5;A0A7P0T916;A0A7P0T8N2;A0A7P0TBJ7;A0A7P0TAF3;A0A7P0TB75;A0A7P0T9K2;A0A2R8Y6H2;A0A7P0T9F1;A0A7P0T8W5;A0A2R8YFZ7;A0A7…
	{"uid": "A0A7P0T934", "roi": 1999, "R": 0.669931153, "exp_thr": 5.0, "exp_bin": false, "source": "KC2023", "note": "CL1- (mv)", "mw": null, "orig_ambiguous": false, "orig_multi_value": true, "og_uid": "Q14204;A0A2R8Y706;A0A7P0T9C4;A0A7P0TA13;A0A2R8Y5T0;A0A7P0T9R4;A0A7P0TAW9;A0A7P0T7V5;A0A7P0T916;A0A7P0T8N2;A0A7P0TBJ7;A0A7P0TAF3;A0A7P0TB75;A0A7P0T9K2;A0A2R8Y6H2;A0A7P0T9F1;A0A7P0T8W5;A0A2R8YFZ7;A0A…
	{"uid": "A0A7P0T9Y3", "roi": 633, "R": 1.28734136, "exp_thr": 5.0, "exp_bin": false, "source": "KC2023", "note": "CL1- (mv)", "mw": null, "orig_ambiguous": false, "orig_multi_value": true, "og_uid": "Q14204;A0A2R8Y706;A0A7P0T9C4;A0A7P0TA13;A0A2R8Y5T0;A0A7P0T9R4;A0A7P0TAW9;A0A7P0T7V5;A0A7P0T916;A0A7P0T8N2;A0A7P0TBJ7;A0A7P0TAF3;A0A7P0TB75;A0A7P0T9K2;A0A2R8Y6H2;A0A7P0T9F1;A0A7P0T8W5;A0A2R8YFZ7;A0A7P…
	{"uid": "A0A7P0T9Y3", "roi": 867, "R": 0.782937647, "exp_thr": 5.0, "exp_bin": false, "source": "KC2023", "note": "CL1- (mv)", "mw": null, "orig_ambiguous": false, "orig_multi_value": true, "og_uid": "Q14204;A0A2R8Y706;A0A7P0T9C4;A0A7P0TA13;A0A2R8Y5T0;A0A7P0T9R4;A0A7P0TAW9;A0A7P0T7V5;A0A7P0T916;A0A7P0T8N2;A0A7P0TBJ7;A0A7P0TAF3;A0A7P0TB75;A0A7P0T9K2;A0A2R8Y6H2;A0A7P0T9F1;A0A7P0T8W5;A0A2R8YFZ7;A0A7…
	{"uid": "A0A7P0TBC9", "roi": 633, "R": 1.28734136, "exp_thr": 5.0, "exp_bin": false, "source": "KC2023", "note": "CL1- (mv)", "mw": null, "orig_ambiguous": false, "orig_multi_value": true, "og_uid": "Q14204;A0A2R8Y706;A0A7P0T9C4;A0A7P0TA13;A0A2R8Y5T0;A0A7P0T9R4;A0A7P0TAW9;A0A7P0T7V5;A0A7P0T916;A0A7P0T8N2;A0A7P0TBJ7;A0A7P0TAF3;A0A7P0TB75;A0A7P0T9K2;A0A2R8Y6H2;A0A7P0T9F1;A0A7P0T8W5;A0A2R8YFZ7;A0A7P…
	{"uid": "A0A7P0TBC9", "roi": 867, "R": 0.782937647, "exp_thr": 5.0, "exp_bin": false, "source": "KC2023", "note": "CL1- (mv)", "mw": null, "orig_ambiguous": false, "orig_multi_value": true, "og_uid": "Q14204;A0A2R8Y706;A0A7P0T9C4;A0A7P0TA13;A0A2R8Y5T0;A0A7P0T9R4;A0A7P0TAW9;A0A7P0T7V5;A0A7P0T916;A0A7P0T8N2;A0A7P0TBJ7;A0A7P0TAF3;A0A7P0TB75;A0A7P0T9K2;A0A2R8Y6H2;A0A7P0T9F1;A0A7P0T8W5;A0A2R8YFZ7;A0A7…
	{"uid": "H3BQ34", "roi": 152, "R": 1.265716342, "exp_thr": 5.0, "exp_bin": false, "source": "KC2023", "note": "CL1- (mv)", "mw": null, "orig_ambiguous": false, "orig_multi_value": true, "og_uid": "P14618;B4DNK4;H3BTN5;H3BQ34;H3BUW1;H3BTJ2", "sequence": "MSKPHSEAGTAFIQTQQLHAAMADTFLEHMCRLDIDSPPITARNTGIICTIGPASRSVETLKEMIKSGMNVARLNFSHGTHEYHAETIKNVRTATESFASDPILYRPVAVALDTKGPEIRTGLIKGSGTAEVELKKGATLKITLD…
	{"uid": "H3BQ34", "roi": 49, "R": 0.986066848, "exp_thr": 5.0, "exp_bin": false, "source": "KC2023", "note": "CL1- (mv)", "mw": null, "orig_ambiguous": false, "orig_multi_value": true, "og_uid": "P14618;B4DNK4;H3BTN5;H3BQ34;H3BUW1;H3BTJ2;H3BT25;H3BU13", "sequence": "MSKPHSEAGTAFIQTQQLHAAMADTFLEHMCRLDIDSPPITARNTGIICTIGPASRSVETLKEMIKSGMNVARLNFSHGTHEYHAETIKNVRTATESFASDPILYRPVAVALDTKGPEIRTGLIKGSGTAEV…
	{"uid": "E9PHV5", "roi": 703, "R": 1.246620858, "exp_thr": 5.0, "exp_bin": false, "source": "KC2023", "note": "CL1- (mv)", "mw": null, "orig_ambiguous": false, "orig_multi_value": true, "og_uid": "P28290;E9PHV5;E7EUL7", "sequence": "MDRPLSSSAEAEEELEWQVASRRRKAWAKCRSSWQASETEDLSTEATTQDEEEDEEEDLPGAQLPAAGGRGNVPNEKIAIWLKDCRTPLGASLDEQSSSTLKGVLVRNGGSFEDDLSLGAEANHLHESDAQIENCNNILAKERRLQFHQKGRSMNSTGSGKSSGTV…
	{"uid": "F8W9G7", "roi": 27, "R": 1.24488331, "exp_thr": 5.0, "exp_bin": false, "source": "KC2023", "note": "CL1- (mv)", "mw": null, "orig_ambiguous": false, "orig_multi_value": true, "og_uid": "O14929;F8W9G7;F8WEW1", "sequence": "MAGFGAMEKFLVEYKSAVEKKLAEYKCNTNTAIELKLVRFPEDLENDIRTFFPEYTHQLFGDEQMMLRAKLDKSFHLDFAQTRMISFLYWKRKLISSHSEPYFIPTQFSVQQEEKTLPFRYIRLT", "mapped_roi": 27, "window_seq": "AVEKKLA…
	{"uid": "F8WEW1", "roi": 27, "R": 1.24488331, "exp_thr": 5.0, "exp_bin": false, "source": "KC2023", "note": "CL1- (mv)", "mw": null, "orig_ambiguous": false, "orig_multi_value": true, "og_uid": "O14929;F8W9G7;F8WEW1", "sequence": "MAGFGAMEKFLVEYKSAVEKKLAEYKCNTNTAIELKLVKLLLVTRV", "mapped_roi": 27, "window_seq": "AVEKKLAEYKCNTNTAIELKL"}
	{"uid": "C9K0E3", "roi": 127, "R": 1.237577616, "exp_thr": 5.0, "exp_bin": false, "source": "KC2023", "note": "CL1- (mv)", "mw": null, "orig_ambiguous": false, "orig_multi_value": true, "og_uid": "Q05655;A0A494C1T7;C9K0E3", "sequence": "MAPFLRIAFNSYELGSLQAEDEANQPFCAVKMKEALSTERGKTLVQKKPTMYPEWKSTFDAHIYEGRVIQIVLMRAAEEPVSEVTVGVSVLAERCKKNNGKAEFWLDLQPQAKVLMSVQYFLEDVDCKQSMRSEDEAKFPTMNRRGAIKQAKIHYIKNHEFI…
	{"uid": "B1AK88", "roi": 235, "R": 1.207668781, "exp_thr": 5.0, "exp_bin": false, "source": "KC2023", "note": "CL1- (mv)", "mw": null, "orig_ambiguous": false, "orig_multi_value": true, "og_uid": "B1AK88;B1AK87;P47756;B1AK85", "sequence": "MHPSRRSLPFPLNCQLARVGTADYGSPSDQSDQQLDCALDLMRRLPPQQIEKNLSDLIDLVPSLCEDLLSSVDQPLKIARDKVVGKDYLLCDYNRDGDSYRSPWSNKYDPPLEDGAMPSARLRKLEVEANNAFDQYRDLYFEGGVSSVYLWDLDHGFAG…
	{"uid": "B1AK88", "roi": 235, "R": 0.694715004, "exp_thr": 5.0, "exp_bin": false, "source": "KC2023", "note": "CL1- (mv)", "mw": null, "orig_ambiguous": false, "orig_multi_value": true, "og_uid": "B1AK88;B1AK87;P47756;B1AK85", "sequence": "MHPSRRSLPFPLNCQLARVGTADYGSPSDQSDQQLDCALDLMRRLPPQQIEKNLSDLIDLVPSLCEDLLSSVDQPLKIARDKVVGKDYLLCDYNRDGDSYRSPWSNKYDPPLEDGAMPSARLRKLEVEANNAFDQYRDLYFEGGVSSVYLWDLDHGFAG…
	{"uid": "K7ERG4", "roi": 46, "R": 1.206662402, "exp_thr": 5.0, "exp_bin": false, "source": "KC2023", "note": "CL1- (mv)", "mw": null, "orig_ambiguous": false, "orig_multi_value": true, "og_uid": "K7ERG4;P62316", "sequence": "MSLLNKPKSEMTPEELQKREEEEFNTGPLSVLTQSVKNNTQVLINCRNNKKLLGRVKAFDSASPPCSPPGTATWCWRT", "mapped_roi": 46, "window_seq": "VKNNTQVLINCRNNKKLLGRV"}
	{"uid": "A0A096LP25", "roi": 1059, "R": 1.204735917, "exp_thr": 5.0, "exp_bin": false, "source": "KC2023", "note": "CL1- (mv)", "mw": null, "orig_ambiguous": false, "orig_multi_value": true, "og_uid": "A0A096LP25;Q6ZSR9", "sequence": "MKKFFDSRREQGGSGLGSGSSGGGGSTSGLGSGYIGRVFGIGRQQVTVDEVLAEGGFAIVFLVRTSNGMKCALKRMFVNNEHDLQVCKREIQIMRDLSGHKNIVGYIDSSINNVSSGDVWEVLILMDFCRGGQVVNLMNQRLQTGFTENEVLQIFCDTCEAVAR…
	{"uid": "A0A096LP25", "roi": 797, "R": 0.678524751, "exp_thr": 5.0, "exp_bin": false, "source": "KC2023", "note": "CL1- (mv)", "mw": null, "orig_ambiguous": false, "orig_multi_value": true, "og_uid": "A0A096LP25;A0A096LNZ0", "sequence": "MKKFFDSRREQGGSGLGSGSSGGGGSTSGLGSGYIGRVFGIGRQQVTVDEVLAEGGFAIVFLVRTSNGMKCALKRMFVNNEHDLQVCKREIQIMRDLSGHKNIVGYIDSSINNVSSGDVWEVLILMDFCRGGQVVNLMNQRLQTGFTENEVLQIFCDTCEA…
	{"uid": "A0A7I2YQ87", "roi": 106, "R": 1.197750331, "exp_thr": 5.0, "exp_bin": false, "source": "KC2023", "note": "CL1- (mv)", "mw": null, "orig_ambiguous": false, "orig_multi_value": true, "og_uid": "O75569;A0A7I2YQ87;A0A7I2V5H3;A0A7I2V593", "sequence": "MSQSRHRAEAPPLEREDSGTFSLGKMITAKPGKTPIQVLHEYGMKTKNIPVYECERSDVQIHVPTFTFRVTVGDITCTGEGTSKKLAKHRAAEAAINILKANASICFAVPDPLMPDPSKQPKNQLNPIGSLQELAIHHGWRLP…
	{"uid": "A0A7I2YQ87", "roi": 54, "R": 0.745354407, "exp_thr": 5.0, "exp_bin": false, "source": "KC2023", "note": "CL1- (mv)", "mw": null, "orig_ambiguous": false, "orig_multi_value": true, "og_uid": "O75569;A0A7I2YQ87;A0A7I2V5H3;A0A7I2V2P4;F8WEG8;G5E9Q4;A0A7I2V5C2;A0A7I2V3L6;C9JMM3", "sequence": "MSQSRHRAEAPPLEREDSGTFSLGKMITAKPGKTPIQVLHEYGMKTKNIPVYECERSDVQIHVPTFTFRVTVGDITCTGEGTSKKLAKHRAAEAAINILKA…
	{"uid": "A0A7I2V5H3", "roi": 106, "R": 1.197750331, "exp_thr": 5.0, "exp_bin": false, "source": "KC2023", "note": "CL1- (mv)", "mw": null, "orig_ambiguous": false, "orig_multi_value": true, "og_uid": "O75569;A0A7I2YQ87;A0A7I2V5H3;A0A7I2V593", "sequence": "MSQSRHRAEAPPLEREDSGTFSLGKMITAKPGKTPIQVLHEYGMKTKNIPVYECERSDVQIHVPTFTFRVTVGDITCTGEGTSKKLAKHRAAEAAINILKANASICFAVPDPLMPDPSKQPKNQLNPIGSLQELAIHHGWRLP…
	{"uid": "A0A7I2V5H3", "roi": 54, "R": 0.745354407, "exp_thr": 5.0, "exp_bin": false, "source": "KC2023", "note": "CL1- (mv)", "mw": null, "orig_ambiguous": false, "orig_multi_value": true, "og_uid": "O75569;A0A7I2YQ87;A0A7I2V5H3;A0A7I2V2P4;F8WEG8;G5E9Q4;A0A7I2V5C2;A0A7I2V3L6;C9JMM3", "sequence": "MSQSRHRAEAPPLEREDSGTFSLGKMITAKPGKTPIQVLHEYGMKTKNIPVYECERSDVQIHVPTFTFRVTVGDITCTGEGTSKKLAKHRAAEAAINILKA…
	{"uid": "U3KQ53", "roi": 7, "R": 1.187152399, "exp_thr": 5.0, "exp_bin": false, "source": "KC2023", "note": "CL1- (mv)", "mw": null, "orig_ambiguous": false, "orig_multi_value": true, "og_uid": "Q86WQ0;U3KQ53;F5H0B6", "sequence": "MTHSLVCPETVSRVSSVLNRNTRQFGKKHLFDQDEETCWNSDQGPSQWVTLEFPQLIRVSQLQIQFQGGFSSRRGCLEGSQGTQALHKIVDFYPEDNNSLQISCPCFWGGWSVPLEALDSPKPEWEP", "mapped_roi": 7, "window_seq": "MTHSLV…
	{"uid": "F5H0B6", "roi": 7, "R": 1.187152399, "exp_thr": 5.0, "exp_bin": false, "source": "KC2023", "note": "CL1- (mv)", "mw": null, "orig_ambiguous": false, "orig_multi_value": true, "og_uid": "Q86WQ0;U3KQ53;F5H0B6", "sequence": "MTHSLVCPETVSRVSSVLNRNTRQFGKKHLFDQDEETCWNSDQVHRALRLSTRL", "mapped_roi": 7, "window_seq": "MTHSLVCPETVSRVSSV"}
	{"uid": "B4DDF4", "roi": 204, "R": 1.17875468, "exp_thr": 5.0, "exp_bin": false, "source": "KC2023", "note": "CL1- (mv)", "mw": null, "orig_ambiguous": false, "orig_multi_value": true, "og_uid": "B4DDF4;B4DUT8;Q99439;A0A087X1X5", "sequence": "MSSTQFNKGPSYGLSAEVKNRLLSKYDPQKEAELRTWIEGLTGLSIGPDFQKGLKDGTILCTLMNKLQPGSVPKINRSMQNWHQLENLSNFIKAMVSYGMNPVDLFEANDLFESGNMTQAKTKGLQSGVDIGVKYSEKQERNFDDATMKAGQCVIG…
	{"uid": "B4DDF4", "roi": 164, "R": 0.787644953, "exp_thr": 5.0, "exp_bin": false, "source": "KC2023", "note": "CL1- (mv)", "mw": null, "orig_ambiguous": false, "orig_multi_value": true, "og_uid": "B4DDF4;B4DUT8;Q99439;H3BVI6;A0A087X271;A0A087X1X5;H3BQH0;U3KPS3", "sequence": "MSSTQFNKGPSYGLSAEVKNRLLSKYDPQKEAELRTWIEGLTGLSIGPDFQKGLKDGTILCTLMNKLQPGSVPKINRSMQNWHQLENLSNFIKAMVSYGMNPVDLFEANDLFESGNMTQAKTK…
	{"uid": "B4DDF4", "roi": 229, "R": 0.529620956, "exp_thr": 5.0, "exp_bin": false, "source": "KC2023", "note": "CL1- (mv)", "mw": null, "orig_ambiguous": false, "orig_multi_value": true, "og_uid": "B4DDF4;B4DUT8;Q99439", "sequence": "MSSTQFNKGPSYGLSAEVKNRLLSKYDPQKEAELRTWIEGLTGLSIGPDFQKGLKDGTILCTLMNKLQPGSVPKINRSMQNWHQLENLSNFIKAMVSYGMNPVDLFEANDLFESGNMTQAKTKGLQSGVDIGVKYSEKQERNFDDATMKAGQCVIGLQMGTNKCAS…
	{"uid": "B4DDF4", "roi": 153, "R": 0.529141667, "exp_thr": 5.0, "exp_bin": false, "source": "KC2023", "note": "CL1- (mv)", "mw": null, "orig_ambiguous": false, "orig_multi_value": true, "og_uid": "B4DDF4;B4DUT8;Q99439;H3BVI6;A0A087X271;A0A087X1X5", "sequence": "MSSTQFNKGPSYGLSAEVKNRLLSKYDPQKEAELRTWIEGLTGLSIGPDFQKGLKDGTILCTLMNKLQPGSVPKINRSMQNWHQLENLSNFIKAMVSYGMNPVDLFEANDLFESGNMTQAKTKGLQSGVDIGVKYSE…
	{"uid": "J3KT65", "roi": 17, "R": 1.17762481, "exp_thr": 5.0, "exp_bin": false, "source": "KC2023", "note": "CL1- (mv)", "mw": null, "orig_ambiguous": false, "orig_multi_value": true, "og_uid": "P63261;I3L4N8;I3L3I0;I3L1U9;I3L3R2;J3KT65;K7EM38;A0A7P0TBL1", "sequence": "MEEEIAALVIDNGSGMCKAGFAGDDAPRAVFPSIVGRPRHQGVMVGMGQKDSYVGDEAQSKRGILTLKYPIEHGIVTNWDDMEKIWHHTFYNELRVAPEEHPVLLTEAPLNPKANREKMTQALFLSRHF…
	{"uid": "I3L4N8", "roi": 17, "R": 1.17762481, "exp_thr": 5.0, "exp_bin": false, "source": "KC2023", "note": "CL1- (mv)", "mw": null, "orig_ambiguous": false, "orig_multi_value": true, "og_uid": "P63261;I3L4N8;I3L3I0;I3L1U9;I3L3R2;J3KT65;K7EM38;A0A7P0TBL1", "sequence": "MEEEIAALVIDNGSGMCKAGFAGDDAPRAVFPSIVGRPRHQGVMVGMGQKDSYVGDEAQSKRGILTLKYPIEHGIVTNWDDMEKIWHHTFYNELRVAPEEHPVLLTEAPLNPKAVLSLYASGRTTGIVM…
	{"uid": "A0A7P0TBL1", "roi": 17, "R": 1.17762481, "exp_thr": 5.0, "exp_bin": false, "source": "KC2023", "note": "CL1- (mv)", "mw": null, "orig_ambiguous": false, "orig_multi_value": true, "og_uid": "P63261;I3L4N8;I3L3I0;I3L1U9;I3L3R2;J3KT65;K7EM38;A0A7P0TBL1", "sequence": "MEEEIAALVIDNGSGMCKAGFAGDDAPRAVFPSIVGASWWAWARRTPTWATRPRASVAS", "mapped_roi": 17, "window_seq": "ALVIDNGSGMCKAGFAGDDAP"}
	{"uid": "A0A7P0Z4F9", "roi": 910, "R": 1.162096994, "exp_thr": 5.0, "exp_bin": false, "source": "KC2023", "note": "CL1- (mv)", "mw": null, "orig_ambiguous": false, "orig_multi_value": true, "og_uid": "A0A3B3IRQ9;A0A7P0Z4F9;P55265;A0A7P0Z4K3", "sequence": "MAEIKEKICDYLFNVSDSSALNLAKNIGLTKARDINAVLIDMERQGDVYRQGTTPPIWHLTDKKRERMQIKRNTNSVPETAPAAIPETKRNAEFLTCNIPTSNASNNMVTTEKVENGQEPVIKLENRQEARPEPARLKPPVHY…
	{"uid": "A0A7P0Z4F9", "roi": 335, "R": 0.795878661, "exp_thr": 5.0, "exp_bin": false, "source": "KC2023", "note": "CL1- (mv)", "mw": null, "orig_ambiguous": false, "orig_multi_value": true, "og_uid": "A0A3B3IRQ9;A0A3B3ISX1;A0A3B3ITG9;A0A7P0Z4F9;P55265;A0A7P0Z4K3;A0A3B3ISU1", "sequence": "MAEIKEKICDYLFNVSDSSALNLAKNIGLTKARDINAVLIDMERQGDVYRQGTTPPIWHLTDKKRERMQIKRNTNSVPETAPAAIPETKRNAEFLTCNIPTSNASNNMVT…
	{"uid": "A0A7P0Z4F9", "roi": 327, "R": 0.542706398, "exp_thr": 5.0, "exp_bin": false, "source": "KC2023", "note": "CL1- (mv)", "mw": null, "orig_ambiguous": false, "orig_multi_value": true, "og_uid": "A0A3B3IRQ9;A0A3B3ISX1;A0A3B3ITG9;A0A7P0Z4F9;P55265;A0A7P0Z4K3;A0A3B3ISU1", "sequence": "MAEIKEKICDYLFNVSDSSALNLAKNIGLTKARDINAVLIDMERQGDVYRQGTTPPIWHLTDKKRERMQIKRNTNSVPETAPAAIPETKRNAEFLTCNIPTSNASNNMVT…
	{"uid": "A0A7P0Z4F9", "roi": 97, "R": 0.375427061, "exp_thr": 5.0, "exp_bin": false, "source": "KC2023", "note": "CL1- (mv)", "mw": null, "orig_ambiguous": false, "orig_multi_value": true, "og_uid": "A0A3B3IRQ9;A0A3B3ISX1;A0A3B3ITG9;A0A7P0TA14;A0A7P0Z4F9;P55265;A0A7P0Z4K3;A0A3B3ISU1", "sequence": "MAEIKEKICDYLFNVSDSSALNLAKNIGLTKARDINAVLIDMERQGDVYRQGTTPPIWHLTDKKRERMQIKRNTNSVPETAPAAIPETKRNAEFLTCNIP…
	{"uid": "A0A7P0Z4F9", "roi": 195, "R": 0.33754276, "exp_thr": 5.0, "exp_bin": false, "source": "KC2023", "note": "CL1- (mv)", "mw": null, "orig_ambiguous": false, "orig_multi_value": true, "og_uid": "A0A3B3IRQ9;A0A3B3ISX1;A0A3B3ITG9;A0A7P0TA14;A0A7P0Z4F9;P55265;A0A7P0Z4K3;A0A3B3ISU1", "sequence": "MAEIKEKICDYLFNVSDSSALNLAKNIGLTKARDINAVLIDMERQGDVYRQGTTPPIWHLTDKKRERMQIKRNTNSVPETAPAAIPETKRNAEFLTCNIP…
	{"uid": "P0DPH7", "roi": 376, "R": 1.157797299, "exp_thr": 5.0, "exp_bin": false, "source": "KC2023", "note": "CL1- (mv)", "mw": null, "orig_ambiguous": false, "orig_multi_value": true, "og_uid": "P68363;P68366;Q71U36;P0DPH8;P0DPH7;Q6PEY2;V9GZ17", "sequence": "MRECISIHVGQAGVQIGNACWELYCLEHGIQPDGQMPSDKTIGGGDDSFNTFFSETGAGKHVPRAVFVDLEPTVVDEVRTGTYRQLFHPEQLITGKEDAANNYARGHYTIGKEIVDLVLDRIRKLADLCTGLQGFLIF…
	{"uid": "P0DPH7", "roi": 347, "R": 0.790249278, "exp_thr": 5.0, "exp_bin": false, "source": "KC2023", "note": "CL1- (mv)", "mw": null, "orig_ambiguous": false, "orig_multi_value": true, "og_uid": "F5H5D3;Q9BQE3;A0A7P0TA31;Q71U36;P0DPH8;P0DPH7;Q6PEY2;V9GZ17;A0A1W2PQM2", "sequence": "MRECISIHVGQAGVQIGNACWELYCLEHGIQPDGQMPSDKTIGGGDDSFNTFFSETGAGKHVPRAVFVDLEPTVVDEVRTGTYRQLFHPEQLITGKEDAANNYARGHYTIGKEIVD…
	{"uid": "P0DPH7", "roi": 295, "R": 0.769692186, "exp_thr": 5.0, "exp_bin": false, "source": "KC2023", "note": "CL1- (mv)", "mw": null, "orig_ambiguous": false, "orig_multi_value": true, "og_uid": "P68363;C9JDS9;P68366;Q71U36;P0DPH8;P0DPH7;Q6PEY2", "sequence": "MRECISIHVGQAGVQIGNACWELYCLEHGIQPDGQMPSDKTIGGGDDSFNTFFSETGAGKHVPRAVFVDLEPTVVDEVRTGTYRQLFHPEQLITGKEDAANNYARGHYTIGKEIVDLVLDRIRKLADLCTGLQGFLIF…
	{"uid": "P0DPH7", "roi": 347, "R": 3.325237897, "exp_thr": 4.0, "exp_bin": false, "source": "KC2023", "note": "CL-Sc- (mv)", "mw": null, "orig_ambiguous": false, "orig_multi_value": true, "og_uid": "Q71U36;P0DPH8;P0DPH7;Q6PEY2;Q9BQE3", "sequence": "MRECISIHVGQAGVQIGNACWELYCLEHGIQPDGQMPSDKTIGGGDDSFNTFFSETGAGKHVPRAVFVDLEPTVVDEVRTGTYRQLFHPEQLITGKEDAANNYARGHYTIGKEIVDLVLDRIRKLADLCTGLQGFLIFHSFGGGTGSGFA…
	{"uid": "P0DPH7", "roi": 347, "R": 0.988824956, "exp_thr": 4.0, "exp_bin": false, "source": "KC2023", "note": "CL-Sc- (mv)", "mw": null, "orig_ambiguous": false, "orig_multi_value": true, "og_uid": "Q71U36;P0DPH8;P0DPH7;Q6PEY2;Q9BQE3", "sequence": "MRECISIHVGQAGVQIGNACWELYCLEHGIQPDGQMPSDKTIGGGDDSFNTFFSETGAGKHVPRAVFVDLEPTVVDEVRTGTYRQLFHPEQLITGKEDAANNYARGHYTIGKEIVDLVLDRIRKLADLCTGLQGFLIFHSFGGGTGSGFA…
	{"uid": "P0DPH7", "roi": 376, "R": 0.711382638, "exp_thr": 4.0, "exp_bin": false, "source": "KC2023", "note": "CL-Sc- (mv)", "mw": null, "orig_ambiguous": false, "orig_multi_value": true, "og_uid": "P68363;P68366;Q71U36;P0DPH8;P0DPH7;Q6PEY2", "sequence": "MRECISIHVGQAGVQIGNACWELYCLEHGIQPDGQMPSDKTIGGGDDSFNTFFSETGAGKHVPRAVFVDLEPTVVDEVRTGTYRQLFHPEQLITGKEDAANNYARGHYTIGKEIVDLVLDRIRKLADLCTGLQGFLIFHSFGG…
	{"uid": "P0DPH7", "roi": 305, "R": 0.594776131, "exp_thr": 4.0, "exp_bin": false, "source": "KC2023", "note": "CL-Sc- (mv)", "mw": null, "orig_ambiguous": false, "orig_multi_value": true, "og_uid": "P68363;P68366;Q71U36;P0DPH8;P0DPH7;Q6PEY2;Q9BQE3", "sequence": "MRECISIHVGQAGVQIGNACWELYCLEHGIQPDGQMPSDKTIGGGDDSFNTFFSETGAGKHVPRAVFVDLEPTVVDEVRTGTYRQLFHPEQLITGKEDAANNYARGHYTIGKEIVDLVLDRIRKLADLCTGLQGFL…
	{"uid": "P0DPH7", "roi": 295, "R": 0.543883772, "exp_thr": 4.0, "exp_bin": false, "source": "KC2023", "note": "CL-Sc- (mv)", "mw": null, "orig_ambiguous": false, "orig_multi_value": true, "og_uid": "P68363;P68366;Q71U36;P0DPH8;P0DPH7;Q6PEY2", "sequence": "MRECISIHVGQAGVQIGNACWELYCLEHGIQPDGQMPSDKTIGGGDDSFNTFFSETGAGKHVPRAVFVDLEPTVVDEVRTGTYRQLFHPEQLITGKEDAANNYARGHYTIGKEIVDLVLDRIRKLADLCTGLQGFLIFHSFGG…
	{"uid": "P0DPH7", "roi": 347, "R": 0.0, "exp_thr": 4.0, "exp_bin": false, "source": "KC2023", "note": "CL-Sc- (mv)", "mw": null, "orig_ambiguous": false, "orig_multi_value": true, "og_uid": "Q71U36;P0DPH8;P0DPH7;Q6PEY2;Q9BQE3", "sequence": "MRECISIHVGQAGVQIGNACWELYCLEHGIQPDGQMPSDKTIGGGDDSFNTFFSETGAGKHVPRAVFVDLEPTVVDEVRTGTYRQLFHPEQLITGKEDAANNYARGHYTIGKEIVDLVLDRIRKLADLCTGLQGFLIFHSFGGGTGSGFASLLMERLS…
	{"uid": "P0DPH7", "roi": 376, "R": 1.157797299, "exp_thr": 5.0, "exp_bin": false, "source": "KC2023", "note": "CL1- (mv)", "mw": null, "orig_ambiguous": false, "orig_multi_value": true, "og_uid": "P68363;P68366;Q71U36;P0DPH8;P0DPH7;Q6PEY2;V9GZ17", "sequence": "MRECISIHVGQAGVQIGNACWELYCLEHGIQPDGQMPSDKTIGGGDDSFNTFFSETGAGKHVPRAVFVDLEPTVVDEVRTGTYRQLFHPEQLITGKEDAANNYARGHYTIGKEIVDLVLDRIRKLADLCTGLQGFLIF…
	{"uid": "P0DPH7", "roi": 347, "R": 0.790249278, "exp_thr": 5.0, "exp_bin": false, "source": "KC2023", "note": "CL1- (mv)", "mw": null, "orig_ambiguous": false, "orig_multi_value": true, "og_uid": "F5H5D3;Q9BQE3;A0A7P0TA31;Q71U36;P0DPH8;P0DPH7;Q6PEY2;V9GZ17;A0A1W2PQM2", "sequence": "MRECISIHVGQAGVQIGNACWELYCLEHGIQPDGQMPSDKTIGGGDDSFNTFFSETGAGKHVPRAVFVDLEPTVVDEVRTGTYRQLFHPEQLITGKEDAANNYARGHYTIGKEIVD…
	{"uid": "P0DPH7", "roi": 295, "R": 0.769692186, "exp_thr": 5.0, "exp_bin": false, "source": "KC2023", "note": "CL1- (mv)", "mw": null, "orig_ambiguous": false, "orig_multi_value": true, "og_uid": "P68363;C9JDS9;P68366;Q71U36;P0DPH8;P0DPH7;Q6PEY2", "sequence": "MRECISIHVGQAGVQIGNACWELYCLEHGIQPDGQMPSDKTIGGGDDSFNTFFSETGAGKHVPRAVFVDLEPTVVDEVRTGTYRQLFHPEQLITGKEDAANNYARGHYTIGKEIVDLVLDRIRKLADLCTGLQGFLIF…
	{"uid": "P0DPH7", "roi": 347, "R": 3.325237897, "exp_thr": 4.0, "exp_bin": false, "source": "KC2023", "note": "CL-Sc- (mv)", "mw": null, "orig_ambiguous": false, "orig_multi_value": true, "og_uid": "Q71U36;P0DPH8;P0DPH7;Q6PEY2;Q9BQE3", "sequence": "MRECISIHVGQAGVQIGNACWELYCLEHGIQPDGQMPSDKTIGGGDDSFNTFFSETGAGKHVPRAVFVDLEPTVVDEVRTGTYRQLFHPEQLITGKEDAANNYARGHYTIGKEIVDLVLDRIRKLADLCTGLQGFLIFHSFGGGTGSGFA…
	{"uid": "P0DPH7", "roi": 347, "R": 0.988824956, "exp_thr": 4.0, "exp_bin": false, "source": "KC2023", "note": "CL-Sc- (mv)", "mw": null, "orig_ambiguous": false, "orig_multi_value": true, "og_uid": "Q71U36;P0DPH8;P0DPH7;Q6PEY2;Q9BQE3", "sequence": "MRECISIHVGQAGVQIGNACWELYCLEHGIQPDGQMPSDKTIGGGDDSFNTFFSETGAGKHVPRAVFVDLEPTVVDEVRTGTYRQLFHPEQLITGKEDAANNYARGHYTIGKEIVDLVLDRIRKLADLCTGLQGFLIFHSFGGGTGSGFA…
	{"uid": "P0DPH7", "roi": 376, "R": 0.711382638, "exp_thr": 4.0, "exp_bin": false, "source": "KC2023", "note": "CL-Sc- (mv)", "mw": null, "orig_ambiguous": false, "orig_multi_value": true, "og_uid": "P68363;P68366;Q71U36;P0DPH8;P0DPH7;Q6PEY2", "sequence": "MRECISIHVGQAGVQIGNACWELYCLEHGIQPDGQMPSDKTIGGGDDSFNTFFSETGAGKHVPRAVFVDLEPTVVDEVRTGTYRQLFHPEQLITGKEDAANNYARGHYTIGKEIVDLVLDRIRKLADLCTGLQGFLIFHSFGG…
	{"uid": "P0DPH7", "roi": 305, "R": 0.594776131, "exp_thr": 4.0, "exp_bin": false, "source": "KC2023", "note": "CL-Sc- (mv)", "mw": null, "orig_ambiguous": false, "orig_multi_value": true, "og_uid": "P68363;P68366;Q71U36;P0DPH8;P0DPH7;Q6PEY2;Q9BQE3", "sequence": "MRECISIHVGQAGVQIGNACWELYCLEHGIQPDGQMPSDKTIGGGDDSFNTFFSETGAGKHVPRAVFVDLEPTVVDEVRTGTYRQLFHPEQLITGKEDAANNYARGHYTIGKEIVDLVLDRIRKLADLCTGLQGFL…
	{"uid": "P0DPH7", "roi": 295, "R": 0.543883772, "exp_thr": 4.0, "exp_bin": false, "source": "KC2023", "note": "CL-Sc- (mv)", "mw": null, "orig_ambiguous": false, "orig_multi_value": true, "og_uid": "P68363;P68366;Q71U36;P0DPH8;P0DPH7;Q6PEY2", "sequence": "MRECISIHVGQAGVQIGNACWELYCLEHGIQPDGQMPSDKTIGGGDDSFNTFFSETGAGKHVPRAVFVDLEPTVVDEVRTGTYRQLFHPEQLITGKEDAANNYARGHYTIGKEIVDLVLDRIRKLADLCTGLQGFLIFHSFGG…
	{"uid": "P0DPH7", "roi": 347, "R": 0.0, "exp_thr": 4.0, "exp_bin": false, "source": "KC2023", "note": "CL-Sc- (mv)", "mw": null, "orig_ambiguous": false, "orig_multi_value": true, "og_uid": "Q71U36;P0DPH8;P0DPH7;Q6PEY2;Q9BQE3", "sequence": "MRECISIHVGQAGVQIGNACWELYCLEHGIQPDGQMPSDKTIGGGDDSFNTFFSETGAGKHVPRAVFVDLEPTVVDEVRTGTYRQLFHPEQLITGKEDAANNYARGHYTIGKEIVDLVLDRIRKLADLCTGLQGFLIFHSFGGGTGSGFASLLMERLS…
	{"uid": "A0A2R8YFH5", "roi": 749, "R": 1.155662419, "exp_thr": 5.0, "exp_bin": false, "source": "KC2023", "note": "CL1- (mv)", "mw": null, "orig_ambiguous": false, "orig_multi_value": true, "og_uid": "A0A2R8YFH5;Q15437;Q5QPE1", "sequence": "MATYLEFIQQNEERDGVRFSWNVWPSSRLEATRMVVPLACLLTPLKERPDLPPVQYEPVLCSRPTCKAVLNPLCQVDYRAKLWACNFCFQRNQFPPAYGGISEVNQPAELMPQFSTIEYVIQEDDLQALKESLQMSLSLLPPDALVGLITFGRMVQVH…
	{"uid": "A0A2R8YFH5", "roi": 162, "R": 0.0, "exp_thr": 5.0, "exp_bin": false, "source": "KC2023", "note": "CL1- (mv)", "mw": null, "orig_ambiguous": false, "orig_multi_value": true, "og_uid": "A0A2R8YFH5;Q15437;Q5QPE2", "sequence": "MATYLEFIQQNEERDGVRFSWNVWPSSRLEATRMVVPLACLLTPLKERPDLPPVQYEPVLCSRPTCKAVLNPLCQVDYRAKLWACNFCFQRNQFPPAYGGISEVNQPAELMPQFSTIEYVIQEDDLQALKESLQMSLSLLPPDALVGLITFGRMVQVHELSCEGIS…
	{"uid": "E9PIY6", "roi": 97, "R": 1.150679098, "exp_thr": 5.0, "exp_bin": false, "source": "KC2023", "note": "CL1- (mv)", "mw": null, "orig_ambiguous": false, "orig_multi_value": true, "og_uid": "E9PIY6;G5E9L0;Q8N6H7;E9PJT7;E9PK28;E9PN48;H0YDX1;H0YF45", "sequence": "MAAEPNKTEIQTLFKRLRAVPTNKACFDCGAKNPSWASITYGVFLCIDCSGVHRSLGVHLSFIRSTELDSNWNWFQLRCMQVGGNANATAFFRQHGCTANDANTKYNSRAAQMYREKIRQLGSAALARHGTD…
	{"uid": "G5E9L0", "roi": 97, "R": 1.150679098, "exp_thr": 5.0, "exp_bin": false, "source": "KC2023", "note": "CL1- (mv)", "mw": null, "orig_ambiguous": false, "orig_multi_value": true, "og_uid": "E9PIY6;G5E9L0;Q8N6H7;E9PJT7;E9PK28;E9PN48;H0YDX1;H0YF45", "sequence": "MAAEPNKTEIQTLFKRLRAVPTNKACFDCGAKNPSWASITYGVFLCIDCSGVHRSLGVHLSFIRSTELDSNWNWFQLRCMQVGGNANATAFFRQHGCTANDANTKYNSRAAQMYREKIRQLGSAALARHGTD…
	{"uid": "E9PK28", "roi": 97, "R": 1.150679098, "exp_thr": 5.0, "exp_bin": false, "source": "KC2023", "note": "CL1- (mv)", "mw": null, "orig_ambiguous": false, "orig_multi_value": true, "og_uid": "E9PIY6;G5E9L0;Q8N6H7;E9PJT7;E9PK28;E9PN48;H0YDX1;H0YF45", "sequence": "MAAEPNKTEIQTLFKRLRAVPTNKACFDCGAKNPSWASITYGVFLCIDCSGVHRSLGVHLSFIRSTELDSNWNWFQLRCMQVGGNANATAFFRQHGCTANDANTKYNSRAAQMYREKIRQLGSAALARHGTD…
	{"uid": "E9PN48", "roi": 97, "R": 1.150679098, "exp_thr": 5.0, "exp_bin": false, "source": "KC2023", "note": "CL1- (mv)", "mw": null, "orig_ambiguous": false, "orig_multi_value": true, "og_uid": "E9PIY6;G5E9L0;Q8N6H7;E9PJT7;E9PK28;E9PN48;H0YDX1;H0YF45", "sequence": "MAAEPNKTEIQTLFKRLRAVPTNKACFDCGAKNPSWASITYGVFLCIDCSGVHRSLGVHLSFIRSTELDSNWNWFQLRCMQVGGNANATAFFRQHGCTANDANTKYNSRAAQMYREKIRQLGSAALARHGTD…
	{"uid": "A0A494C0R8", "roi": 1235, "R": 1.147649606, "exp_thr": 5.0, "exp_bin": false, "source": "KC2023", "note": "CL1- (mv)", "mw": null, "orig_ambiguous": false, "orig_multi_value": true, "og_uid": "A0A494C0R8;K7EIG1;I3L2B0;O75153", "sequence": "MVIKTDELPAAAPADSAREHGSQAGGKGRPGAAELPSVMLLNGDCPESLKKEAAAAEPPRENGLDEAGPGDETTGQEVIVIQDTGFSVKILAPGIEPFSLQVSPQEMVQEIHQVLMDREDTCHRTCFSLHLDGNVLDHFSELRSVEGLQE…
	{"uid": "A0A494C0R8", "roi": 222, "R": 0.82822262, "exp_thr": 5.0, "exp_bin": false, "source": "KC2023", "note": "CL1- (mv)", "mw": null, "orig_ambiguous": false, "orig_multi_value": true, "og_uid": "A0A494C0R8;K7EIG1;I3L2B0;O75153", "sequence": "MVIKTDELPAAAPADSAREHGSQAGGKGRPGAAELPSVMLLNGDCPESLKKEAAAAEPPRENGLDEAGPGDETTGQEVIVIQDTGFSVKILAPGIEPFSLQVSPQEMVQEIHQVLMDREDTCHRTCFSLHLDGNVLDHFSELRSVEGLQEGS…
	{"uid": "E9PDP5", "roi": 213, "R": 1.143220209, "exp_thr": 5.0, "exp_bin": false, "source": "KC2023", "note": "CL1- (mv)", "mw": null, "orig_ambiguous": false, "orig_multi_value": true, "og_uid": "Q8IWZ3;E9PDP5;D6RHC4", "sequence": "MLTDSGGGGTSFEEDLDSVAPRSAPAGASEPPPPGGVGLGIRTVRLFGEAGPASGVGSSGGGGSGSGTGGGDAALDFKLAAAVLRTGGGGGASGSDEDEVSEVESFILDQEDLDNPVLKTTSEIFLSSTAEGADLRTVDPETQARLEALLEAAGIGKLSTADGKAF…
	{"uid": "E9PDP5", "roi": 181, "R": 0.0, "exp_thr": 5.0, "exp_bin": false, "source": "KC2023", "note": "CL1- (mv)", "mw": null, "orig_ambiguous": false, "orig_multi_value": true, "og_uid": "H0YM23;O75179;A0A1W2PQ15;Q8IWZ3;E9PDP5;D6RHC4", "sequence": "MLTDSGGGGTSFEEDLDSVAPRSAPAGASEPPPPGGVGLGIRTVRLFGEAGPASGVGSSGGGGSGSGTGGGDAALDFKLAAAVLRTGGGGGASGSDEDEVSEVESFILDQEDLDNPVLKTTSEIFLSSTAEGADLRTVDPETQARLEAL…
	{"uid": "A0A6Q8PH91", "roi": 199, "R": 1.141456666, "exp_thr": 5.0, "exp_bin": false, "source": "KC2023", "note": "CL1- (mv)", "mw": null, "orig_ambiguous": false, "orig_multi_value": true, "og_uid": "A0A6Q8PH91;Q9BQ69", "sequence": "MSLQSRLSGRLAQLRAAGQLLVPPRPRPGHLAGATRTRSSTCGPPAFLGVFGRRARTSAGVGAWGAAAVGRTAGVRTWAPLAMAAKVDLSTSTDWKEAKSFLKGLSDKQREEHYFCKDFVRLKKIPTWKEMAKGVAVKVEEPRYKKDKQLNEKISLLRSDITKLE…
	{"uid": "E9PQW4", "roi": 82, "R": 1.135004026, "exp_thr": 5.0, "exp_bin": false, "source": "KC2023", "note": "CL1- (mv)", "mw": null, "orig_ambiguous": false, "orig_multi_value": true, "og_uid": "P27361;E9PQW4;E9PBK7;E9PJF0;P28482", "sequence": "MAAAAAQGGGGGEPRRTEGVGPGVPGEVEMVKGQPFDVGPRYTQLQYIGEGAYGMVSSAYDHVRKTRVAIKKISPFEHQTYCQRTLREIQILLRFRHENVIGIRDILRASTLEAMRDVYIVQDLMETDLYKLLKSQQLSNDHICYFLYQILRG…
	{"uid": "E9PJF0", "roi": 82, "R": 1.135004026, "exp_thr": 5.0, "exp_bin": false, "source": "KC2023", "note": "CL1- (mv)", "mw": null, "orig_ambiguous": false, "orig_multi_value": true, "og_uid": "P27361;E9PQW4;E9PBK7;E9PJF0;P28482", "sequence": "MAAAAAQGGGGGEPRRTEGVGPGVPGEVEMVKGQPFDVGPRYTQLQYIGEGAYGMVSSAYDHVRKTRVAIKKISPFEHQTYCQRTLREIQILLRFRHENVIGIRDILRASTLEAMRDVYIVQDLMETDLYKLLKSQQLSNDHICYFLYQILRG…
	{"uid": "K7EQN9", "roi": 46, "R": 1.13449343, "exp_thr": 5.0, "exp_bin": false, "source": "KC2023", "note": "CL1- (mv)", "mw": null, "orig_ambiguous": false, "orig_multi_value": true, "og_uid": "Q9UJT1;K7EQN9", "sequence": "MSIVTVQLGQCGNQIGFEVFDALLSDSHSSQGLCSMRENEAYQASCKERFFSEEENGVPIARAVLVDMEPKVINQMLSKAAQSGQWKYGQHACFCQKQGSGNNWAYGRDKDSACYPDWSGTPGLQ", "mapped_roi": 46, "window_seq": "MRENEAYQASCKER…
	{"uid": "G3XAP5", "roi": 163, "R": 1.133979076, "exp_thr": 5.0, "exp_bin": false, "source": "KC2023", "note": "CL1- (mv)", "mw": null, "orig_ambiguous": false, "orig_multi_value": true, "og_uid": "P00338;A0A3B3IS95;A0A5F9ZHM4;P07195;A8MW50;A0A087WUM2;F5H245;G3XAP5;F5H5G7;F5H155;P07864;Q6ZMR3", "sequence": "MSTVKEQLIEKLIEDDENSQCKITIVGTGAVGMACAISILLKDLADELALVDVALDKLKGEMMDLQHGSLFFSTSKITSGKDYSVSANSRI…
	{"uid": "F5H155", "roi": 163, "R": 1.133979076, "exp_thr": 5.0, "exp_bin": false, "source": "KC2023", "note": "CL1- (mv)", "mw": null, "orig_ambiguous": false, "orig_multi_value": true, "og_uid": "P00338;A0A3B3IS95;A0A5F9ZHM4;P07195;A8MW50;A0A087WUM2;F5H245;G3XAP5;F5H5G7;F5H155;P07864;Q6ZMR3", "sequence": "MSTVKEQLIEKLIEDDENSQCKITIVGTGAVGMACAISILLKDLADELALVDVALDKLKGEMMDLQHGSLFFSTSKITSGKDYSVSANSRI…
	{"uid": "P07864", "roi": 163, "R": 1.133979076, "exp_thr": 5.0, "exp_bin": false, "source": "KC2023", "note": "CL1- (mv)", "mw": null, "orig_ambiguous": false, "orig_multi_value": true, "og_uid": "P00338;A0A3B3IS95;A0A5F9ZHM4;P07195;A8MW50;A0A087WUM2;F5H245;G3XAP5;F5H5G7;F5H155;P07864;Q6ZMR3", "sequence": "MSTVKEQLIEKLIEDDENSQCKITIVGTGAVGMACAISILLKDLADELALVDVALDKLKGEMMDLQHGSLFFSTSKITSGKDYSVSANSRI…
	{"uid": "P07864", "roi": 163, "R": 1.177557128, "exp_thr": 4.0, "exp_bin": false, "source": "KC2023", "note": "CL-Sc- (mv)", "mw": null, "orig_ambiguous": false, "orig_multi_value": true, "og_uid": "P00338;Q6ZMR3;P07195;P07864", "sequence": "MSTVKEQLIEKLIEDDENSQCKITIVGTGAVGMACAISILLKDLADELALVDVALDKLKGEMMDLQHGSLFFSTSKITSGKDYSVSANSRIVIVTAGARQQEGETRLALVQRNVAIMKSIIPAIVHYSPDCKILVVSNPVDILTYIVWKISGLPVTR…
	{"uid": "Q6ZMR3", "roi": 163, "R": 1.133979076, "exp_thr": 5.0, "exp_bin": false, "source": "KC2023", "note": "CL1- (mv)", "mw": null, "orig_ambiguous": false, "orig_multi_value": true, "og_uid": "P00338;A0A3B3IS95;A0A5F9ZHM4;P07195;A8MW50;A0A087WUM2;F5H245;G3XAP5;F5H5G7;F5H155;P07864;Q6ZMR3", "sequence": "MATIKSELIKNFAEEEAIHHNKISIVGTGSVGVACAISILLKGLSDELVLVDVDEGKLKGETMDLQHGSPFMKMPNIVSSKDYLVTANSNL…
	{"uid": "Q6ZMR3", "roi": 163, "R": 1.177557128, "exp_thr": 4.0, "exp_bin": false, "source": "KC2023", "note": "CL-Sc- (mv)", "mw": null, "orig_ambiguous": false, "orig_multi_value": true, "og_uid": "P00338;Q6ZMR3;P07195;P07864", "sequence": "MATIKSELIKNFAEEEAIHHNKISIVGTGSVGVACAISILLKGLSDELVLVDVDEGKLKGETMDLQHGSPFMKMPNIVSSKDYLVTANSNLVIITAGARQKKGETRLDLVQRNVSIFKLMIPNITQYSPHCKLLIVTNPVDILTYVAWKLSGFPKNR…
	{"uid": "Q6ZMR3", "roi": 163, "R": 1.07588415, "exp_thr": 4.0, "exp_bin": false, "source": "KC2023", "note": "CL-Sc- (mv)", "mw": null, "orig_ambiguous": false, "orig_multi_value": true, "og_uid": "P00338;Q6ZMR3", "sequence": "MATIKSELIKNFAEEEAIHHNKISIVGTGSVGVACAISILLKGLSDELVLVDVDEGKLKGETMDLQHGSPFMKMPNIVSSKDYLVTANSNLVIITAGARQKKGETRLDLVQRNVSIFKLMIPNITQYSPHCKLLIVTNPVDILTYVAWKLSGFPKNRVIGSGCNLDSARFRY…
	{"uid": "J3QT61", "roi": 150, "R": 1.128973288, "exp_thr": 5.0, "exp_bin": false, "source": "KC2023", "note": "CL1- (mv)", "mw": null, "orig_ambiguous": false, "orig_multi_value": true, "og_uid": "J3QT61;J3QSB2;J3QRV9;O75616", "sequence": "MAAPSWRGARLVQSVLRVWQVGPHVARERVIPFSSLLGFQRRCVSCVAGSAFSGPRLASASRSNGQGSALDHFLGFSQPDSSVTPCVPAVSMNRDEQDVLLVHHPDMPENSRVLRVVLLGAPNAGKSTLSNQLLGRKVFPVSRKVHTTRCQALGVITEK…
	{"uid": "A0A590UJT6", "roi": 434, "R": 1.128291345, "exp_thr": 5.0, "exp_bin": false, "source": "KC2023", "note": "CL1- (mv)", "mw": null, "orig_ambiguous": false, "orig_multi_value": true, "og_uid": "A0A590UJT6;A0A494BX66;Q2TAC2", "sequence": "MLPLGSEPALNELLLRKEEEWRALQAHRTQLQEAALQDTRSQLEEAQGKLRCLQEDFVYNLQVLEERDLELERYDAAFAQAREWEEARRAEVSELKIEAAKLRQALAREARKVEELQQQQQLAFQEHRLELERVHSDKNGEIDHHREQYENLKW…
	{"uid": "Q2TAC2", "roi": 434, "R": 1.128291345, "exp_thr": 5.0, "exp_bin": false, "source": "KC2023", "note": "CL1- (mv)", "mw": null, "orig_ambiguous": false, "orig_multi_value": true, "og_uid": "A0A590UJT6;A0A494BX66;Q2TAC2", "sequence": "MLPLGSEPALNELLLRKEEEWRALQAHRTQLQEAALQDTRSQLEEAQGKLRCLQEDFVYNLQVLEERDLELERYDAAFAQAREWEEARRAEVSELKIEAAKLRQALAREARKVEELQQQQQLAFQEHRLELERVHSDKNGEIDHHREQYENLKWTLER…
	{"uid": "E9PR92", "roi": 69, "R": 1.126366925, "exp_thr": 5.0, "exp_bin": false, "source": "KC2023", "note": "CL1- (mv)", "mw": null, "orig_ambiguous": false, "orig_multi_value": true, "og_uid": "Q9NVT9;E5RJ86;E9PR92;E5RHK3", "sequence": "MNSSTSTMSEEPDALSVVNQLRDLAADPLNRRAIVQDQGCLPGLILFMDHPNPPVVHSALLALRYLAECRANREKMKGELGMMLSLQNVIQNLGEIYVKRLC", "mapped_roi": 69, "window_seq": "ALLALRYLAECRANREKMKGE"}
	{"uid": "J3KR24", "roi": 120, "R": 1.117877115, "exp_thr": 5.0, "exp_bin": false, "source": "KC2023", "note": "CL1- (mv)", "mw": null, "orig_ambiguous": false, "orig_multi_value": true, "og_uid": "P41252;A0A0A0MSX9;J3KR24", "sequence": "MLQQVPENINFPAEEEKILEFWTEFNCFQECLKQSKHKPKFTFYDGPPFATGLPHYGHILAGTIKDIVTRYAHQSGFHVDRRFGWDCHGLPVEYEIDKTLGIRGPEDVAKMGITEYNNQCRAIVMRYSAEWKSTVSRLGRWIDFDNDYKTLYPQFMESVWWV…
	{"uid": "J3KR24", "roi": 185, "R": 0.0, "exp_thr": 5.0, "exp_bin": false, "source": "KC2023", "note": "CL1- (mv)", "mw": null, "orig_ambiguous": false, "orig_multi_value": true, "og_uid": "P41252;A0A0A0MSX9;J3KR24", "sequence": "MLQQVPENINFPAEEEKILEFWTEFNCFQECLKQSKHKPKFTFYDGPPFATGLPHYGHILAGTIKDIVTRYAHQSGFHVDRRFGWDCHGLPVEYEIDKTLGIRGPEDVAKMGITEYNNQCRAIVMRYSAEWKSTVSRLGRWIDFDNDYKTLYPQFMESVWWVFKQLYDKG…
	{"uid": "K7EN60", "roi": 139, "R": 1.116033755, "exp_thr": 5.0, "exp_bin": false, "source": "KC2023", "note": "CL1- (mv)", "mw": null, "orig_ambiguous": false, "orig_multi_value": true, "og_uid": "K7EN60;Q9BQ61", "sequence": "MAARGRRAEPQGREAPGPAGGGGGGSRWAESGSGTSPESGDEEVSGAGSSPVSGGVNLFANDGSFLELFKRKMEEEQRQRQEEPPPGPQRPDQSAAAAGPGDPKRKGGPGSTLSFVLTSKGDAWAKYMAEVKKYKAHQCGDDDKTRPLVK", "mapped_roi": 139, "…
	{"uid": "R4GMY8", "roi": 11, "R": 1.115342802, "exp_thr": 5.0, "exp_bin": false, "source": "KC2023", "note": "CL1- (mv)", "mw": null, "orig_ambiguous": false, "orig_multi_value": true, "og_uid": "Q15369;E5RHG8;R4GMY8", "sequence": "MDGEEKTYGGCEGPDAMYVKLISSDGHEFIVKREHALTSGTIKAMLSGPDMVSTMLPRLKCSGCS", "mapped_roi": 11, "window_seq": "MDGEEKTYGGCEGPDAMYVKL"}
	{"uid": "Q5TDF0", "roi": 110, "R": 1.115197788, "exp_thr": 5.0, "exp_bin": false, "source": "KC2023", "note": "CL1- (mv)", "mw": null, "orig_ambiguous": false, "orig_multi_value": true, "og_uid": "Q5TDF0;Q9BSD7", "sequence": "MARHVFLTGPPGVGKTTLIHKASEVLKSSGVPVDGFYTEEVRQGGRRIGFDVVTLSGTRGPLSRVGLEPPPGKRECRVGQYVVDLTSFEQLALPVLRNADCSSGPGQRVCVIDEIGKMELFSQLFIQAVRQTLSTPGTIILGTIPVPKGKPLALVEEIRNRKDVKVFNSPYCV…
	{"uid": "Q5TDF0", "roi": 101, "R": 0.780426029, "exp_thr": 5.0, "exp_bin": false, "source": "KC2023", "note": "CL1- (mv)", "mw": null, "orig_ambiguous": false, "orig_multi_value": true, "og_uid": "Q5TDF0;Q9BSD7", "sequence": "MARHVFLTGPPGVGKTTLIHKASEVLKSSGVPVDGFYTEEVRQGGRRIGFDVVTLSGTRGPLSRVGLEPPPGKRECRVGQYVVDLTSFEQLALPVLRNADCSSGPGQRVCVIDEIGKMELFSQLFIQAVRQTLSTPGTIILGTIPVPKGKPLALVEEIRNRKDVKVFNSPYCV…
	{"uid": "Q5T7F5", "roi": 9, "R": 1.114316635, "exp_thr": 5.0, "exp_bin": false, "source": "KC2023", "note": "CL1- (mv)", "mw": null, "orig_ambiguous": false, "orig_multi_value": true, "og_uid": "Q8N1G2;Q5T7F5", "sequence": "MKRRTDPECTAPIKKQKKRVAELALSLSSTSDDEPPSSVSHGAKASTTSLSGSDSETEGKQHSSDSFDDAFKADSLVEGTSSRYSMYNSVSQKLMAKMGFREGEGLGKYSQGRKDIVEASSQKGRRGLGLTLRGFDQELNVDWRDEPEPSACEQVSWFPECTTEIPDTQEMSDWM…
	{"uid": "Q5T7F5", "roi": 9, "R": 0.455526407, "exp_thr": 5.0, "exp_bin": false, "source": "KC2023", "note": "CL1- (mv)", "mw": null, "orig_ambiguous": false, "orig_multi_value": true, "og_uid": "Q8N1G2;Q5T7F5", "sequence": "MKRRTDPECTAPIKKQKKRVAELALSLSSTSDDEPPSSVSHGAKASTTSLSGSDSETEGKQHSSDSFDDAFKADSLVEGTSSRYSMYNSVSQKLMAKMGFREGEGLGKYSQGRKDIVEASSQKGRRGLGLTLRGFDQELNVDWRDEPEPSACEQVSWFPECTTEIPDTQEMSDWM…
	{"uid": "A0A0C4DG34", "roi": 30, "R": 1.111924401, "exp_thr": 5.0, "exp_bin": false, "source": "KC2023", "note": "CL1- (mv)", "mw": null, "orig_ambiguous": false, "orig_multi_value": true, "og_uid": "O95081;A0A0C4DG34", "sequence": "MVMAAKKGPGPGGGVSGGKAEAEAASEVWCRRVRELGGCSQAGNRHCFECAQRGVTYVDITVGSFVCTTCSGLLRGLNPPHRVKSISMTTFTEPEVVFLQSRGNEVCRKIWLGLFDARTSLVPDSRDPQKVKEFLQEKYEKKRWPDTFPRRLCQL", "mapped_…
	{"uid": "H3BQK0", "roi": 398, "R": 1.106792765, "exp_thr": 5.0, "exp_bin": false, "source": "KC2023", "note": "CL1- (mv)", "mw": null, "orig_ambiguous": false, "orig_multi_value": true, "og_uid": "H3BQK0;Q9UMR2;F6QDS0;I3L352;Q9NUU7;I3L0H8", "sequence": "MAGAAGRVQDRALRRFPITLPVGDLSNLHLKEEKIKPDTNGAVVKTNANAEKTDEEEKEDRAAQSLLNKLIRSNLVDNTNQVEVLQRDPNSPLYSVKSFEELRLKPQLLQGVYAMGFNRPSKIQENALPLMLAEPPQNLIAQSQS…
	{"uid": "B1AL69", "roi": 124, "R": 1.106621972, "exp_thr": 5.0, "exp_bin": false, "source": "KC2023", "note": "CL1- (mv)", "mw": null, "orig_ambiguous": false, "orig_multi_value": true, "og_uid": "B1AL69;Q7L3B6", "sequence": "MEQPWPPPGPWSLPRAEGEAEEESDFDVFPSSPRCPQLPGGGAQMYSHGIELACQKQKEFVKSSVACKWNLAEAQQKLGSLALHNSESLDQEHAKAQTAVSELRQREEEWRQKEEALVQREKMCLWSTDAISKDVFNKSFINQDKRKDTEDEDKSESFMQKYEQKIRHFGMLS…
	{"uid": "F8WEU8", "roi": 11, "R": 1.10196789, "exp_thr": 5.0, "exp_bin": false, "source": "KC2023", "note": "CL1- (mv)", "mw": null, "orig_ambiguous": false, "orig_multi_value": true, "og_uid": "F8WEU8;Q9UBF6", "sequence": "MADVEDGEETCALASHSGSSGSKSGGDKMFSLKKWNAVAMWSWDVECDTCAICRVQMRELEFVIGPRP", "mapped_roi": 11, "window_seq": "MADVEDGEETCALASHSGSSG"}
	{"uid": "E9PLL6", "roi": 70, "R": 1.096705219, "exp_thr": 5.0, "exp_bin": false, "source": "KC2023", "note": "CL1- (mv)", "mw": null, "orig_ambiguous": false, "orig_multi_value": true, "og_uid": "P46776;E9PLL6;E9PJD9", "sequence": "MPSRLRKTRKLRGHVSHGHGRIGKHRKHPGGRGNAGGLHHHRINFDKYHPGYFGKVGMKHYHLKRNQSFCPTVNLDKLWTLVSEQTRVNAAKNKTGAAPIIDVVRSVS", "mapped_roi": 70, "window_seq": "HYHLKRNQSFCPTVNLDKLWT"}
	{"uid": "E9PLL6", "roi": 70, "R": 0.695946996, "exp_thr": 5.0, "exp_bin": false, "source": "KC2023", "note": "CL1- (mv)", "mw": null, "orig_ambiguous": false, "orig_multi_value": true, "og_uid": "P46776;E9PLL6;E9PJD9", "sequence": "MPSRLRKTRKLRGHVSHGHGRIGKHRKHPGGRGNAGGLHHHRINFDKYHPGYFGKVGMKHYHLKRNQSFCPTVNLDKLWTLVSEQTRVNAAKNKTGAAPIIDVVRSVS", "mapped_roi": 70, "window_seq": "HYHLKRNQSFCPTVNLDKLWT"}
	{"uid": "Q6P2S0", "roi": 39, "R": 1.096109184, "exp_thr": 5.0, "exp_bin": false, "source": "KC2023", "note": "CL1- (mv)", "mw": null, "orig_ambiguous": false, "orig_multi_value": true, "og_uid": "P49458;Q6P2S0;Q659G3;E9PE20", "sequence": "MPQYQTWEEFSRAAEKLYLADPMKARVVLKYRHSDGNLCVKVTDDLVDH", "mapped_roi": 39, "window_seq": "LKYRHSDGNLCVKVTDDLVDH"}
	{"uid": "Q659G3", "roi": 39, "R": 1.096109184, "exp_thr": 5.0, "exp_bin": false, "source": "KC2023", "note": "CL1- (mv)", "mw": null, "orig_ambiguous": false, "orig_multi_value": true, "og_uid": "P49458;Q6P2S0;Q659G3;E9PE20", "sequence": "MPQYQTWEEFSRAAEKLYLADPMKARVVLKYRHSDGNLCVKVTDDLVTKLKM", "mapped_roi": 39, "window_seq": "LKYRHSDGNLCVKVTDDLVTK"}
	{"uid": "E9PE20", "roi": 39, "R": 1.096109184, "exp_thr": 5.0, "exp_bin": false, "source": "KC2023", "note": "CL1- (mv)", "mw": null, "orig_ambiguous": false, "orig_multi_value": true, "og_uid": "P49458;Q6P2S0;Q659G3;E9PE20", "sequence": "MPQYQTWEEFSRAAEKLYLADPMKARVVLKYRHSDGNLCVKVTDDLVQWHLNYCTLRHGIAGGLET", "mapped_roi": 39, "window_seq": "LKYRHSDGNLCVKVTDDLVQW"}
	{"uid": "A0A7P0T8T9", "roi": 77, "R": 1.095204332, "exp_thr": 5.0, "exp_bin": false, "source": "KC2023", "note": "CL1- (mv)", "mw": null, "orig_ambiguous": false, "orig_multi_value": true, "og_uid": "P31749;A0A5F9ZHU3;A0A7P0T8T9;A0A5K1VW74;Q9Y243;A0A7P0TB29;F8VS91;A0A7P0TBJ6;A0A7P0TB32;P31751;M0R0P9;J3QKW1;C9JHS6;J3QLS6;M0QZK3;A8MX96;A0A5F9ZHJ8;E7EVP8;J3KRI8;A0A1B0GXA2;C9JIJ1;A0A0A0MRF1;C9JC83;J3…
	{"uid": "E7EPB3", "roi": 42, "R": 1.092454269, "exp_thr": 5.0, "exp_bin": false, "source": "KC2023", "note": "CL1- (mv)", "mw": null, "orig_ambiguous": false, "orig_multi_value": true, "og_uid": "E7EPB3;P50914", "sequence": "MVFRRFVEVGRVAYVSFGPHAGKLVAIVDVIDQNRALVDGPCTQVRRQAMPFKCMQLTDFILKFPHSAHQKYVRQAWQKADINTKWAATRWAKKIEARERKAKMTDFDRFKVMKAKKMEQNNQE", "mapped_roi": 42, "window_seq": "DQNRALVDGPCTQV…
	{"uid": "E7EPB3", "roi": 54, "R": 0.600154679, "exp_thr": 5.0, "exp_bin": false, "source": "KC2023", "note": "CL1- (mv)", "mw": null, "orig_ambiguous": false, "orig_multi_value": true, "og_uid": "E7EPB3;P50914", "sequence": "MVFRRFVEVGRVAYVSFGPHAGKLVAIVDVIDQNRALVDGPCTQVRRQAMPFKCMQLTDFILKFPHSAHQKYVRQAWQKADINTKWAATRWAKKIEARERKAKMTDFDRFKVMKAKKMEQNNQE", "mapped_roi": 54, "window_seq": "QVRRQAMPFKCMQL…
	{"uid": "I3L387", "roi": 67, "R": 1.081370332, "exp_thr": 5.0, "exp_bin": false, "source": "KC2023", "note": "CL1- (mv)", "mw": null, "orig_ambiguous": false, "orig_multi_value": true, "og_uid": "P53350;I3L387", "sequence": "MSAAVTAGKLARAPADPGKAGVPGVAAPGAPAAAPPAKEIPEVLVDPRSRRRYVRGRFLGKGGFAKCFEISDADTKEVFAGKIVPKSLLLKPHQREKMSMEISIHRSLAHQHVVGFHGFFEDNDFVFVVLELCRRRVSVAAGELELPAGQLERPDLELLERVPSKGEPGTWSC"…
	{"uid": "A0A087WX83", "roi": 408, "R": 1.075577028, "exp_thr": 5.0, "exp_bin": false, "source": "KC2023", "note": "CL1- (mv)", "mw": null, "orig_ambiguous": false, "orig_multi_value": true, "og_uid": "A0A087WX83;A0A075B749;Q5VU43;E9PQG4", "sequence": "MKGTDSGSCCRRRCDFGCCCRASRRAHYTPYRSGDATRTPQSPRQTPSRERRRPEPAGSWAAAAEEEEAAAAATPWMRDYFAEDDGEMVPRTSHTAAFLSDTKDRGPPVQSQIWRSGEKVPFVQTYSLRAFEKPPQVQTQALRDFEK…
	{"uid": "A0A087WX83", "roi": 754, "R": 0.333266998, "exp_thr": 5.0, "exp_bin": false, "source": "KC2023", "note": "CL1- (mv)", "mw": null, "orig_ambiguous": false, "orig_multi_value": true, "og_uid": "A0A087WX83;A0A075B749;Q5VU43;E9PQG4", "sequence": "MKGTDSGSCCRRRCDFGCCCRASRRAHYTPYRSGDATRTPQSPRQTPSRERRRPEPAGSWAAAAEEEEAAAAATPWMRDYFAEDDGEMVPRTSHTAAFLSDTKDRGPPVQSQIWRSGEKVPFVQTYSLRAFEKPPQVQTQALRDFEK…
	{"uid": "A0A075B749", "roi": 408, "R": 1.075577028, "exp_thr": 5.0, "exp_bin": false, "source": "KC2023", "note": "CL1- (mv)", "mw": null, "orig_ambiguous": false, "orig_multi_value": true, "og_uid": "A0A087WX83;A0A075B749;Q5VU43;E9PQG4", "sequence": "MKGTDSGSCCRRRCDFGCCCRASRRAHYTPYRSGDATRTPQSPRQTPSRERRRPEPAGSWAAAAEEEEAAAAATPWMRDYFAEDDGEMVPRTSHTAAFLSDTKDRGPPVQSQIWRSGEKVPFVQTYSLRAFEKPPQVQTQALRDFEK…
	{"uid": "A0A075B749", "roi": 754, "R": 0.333266998, "exp_thr": 5.0, "exp_bin": false, "source": "KC2023", "note": "CL1- (mv)", "mw": null, "orig_ambiguous": false, "orig_multi_value": true, "og_uid": "A0A087WX83;A0A075B749;Q5VU43;E9PQG4", "sequence": "MKGTDSGSCCRRRCDFGCCCRASRRAHYTPYRSGDATRTPQSPRQTPSRERRRPEPAGSWAAAAEEEEAAAAATPWMRDYFAEDDGEMVPRTSHTAAFLSDTKDRGPPVQSQIWRSGEKVPFVQTYSLRAFEKPPQVQTQALRDFEK…
	{"uid": "K9J957", "roi": 92, "R": 1.072780508, "exp_thr": 5.0, "exp_bin": false, "source": "KC2023", "note": "CL1- (mv)", "mw": null, "orig_ambiguous": false, "orig_multi_value": true, "og_uid": "P61289;B3KQ25;K7ESG5;K9J957;K7ENH2;K7EMD0;K7EPX6;K7EKR3", "sequence": "MASLLKVDQEVKLKVDSFRERITSEAEDLVANFFPKKLLELDSFLKEPILNIHDLTQIHSDMNLPVPDPILLTNSHDGLDGPTYKKRRLDECEEAFQGTKVFVMPNGMLKSNQQLVDIIEKVKPEIRLLIEK…
	{"uid": "K9J957", "roi": 92, "R": 0.860538266, "exp_thr": 5.0, "exp_bin": false, "source": "KC2023", "note": "CL1- (mv)", "mw": null, "orig_ambiguous": false, "orig_multi_value": true, "og_uid": "P61289;B3KQ25;K7ESG5;K9J957;K7ENH2;K7EMD0;K7EPX6;K7EKR3", "sequence": "MASLLKVDQEVKLKVDSFRERITSEAEDLVANFFPKKLLELDSFLKEPILNIHDLTQIHSDMNLPVPDPILLTNSHDGLDGPTYKKRRLDECEEAFQGTKVFVMPNGMLKSNQQLVDIIEKVKPEIRLLIEK…
	{"uid": "K9J957", "roi": 92, "R": 1.072780508, "exp_thr": 5.0, "exp_bin": false, "source": "KC2023", "note": "CL1- (mv)", "mw": null, "orig_ambiguous": false, "orig_multi_value": true, "og_uid": "P61289;B3KQ25;K7ESG5;K9J957;K7ENH2;K7EMD0;K7EPX6;K7EKR3", "sequence": "MASLLKVDQEVKLKVDSFRERITSEAEDLVANFFPKKLLELDSFLKEPILNIHDLTQIHSDMNLPVPDPILLTNSHDGLDGPTYKKRRLDECEEAFQGTKVFVMPNGMLKSNQQLVDIIEKVKPEIRLLIEK…
	{"uid": "K9J957", "roi": 92, "R": 0.860538266, "exp_thr": 5.0, "exp_bin": false, "source": "KC2023", "note": "CL1- (mv)", "mw": null, "orig_ambiguous": false, "orig_multi_value": true, "og_uid": "P61289;B3KQ25;K7ESG5;K9J957;K7ENH2;K7EMD0;K7EPX6;K7EKR3", "sequence": "MASLLKVDQEVKLKVDSFRERITSEAEDLVANFFPKKLLELDSFLKEPILNIHDLTQIHSDMNLPVPDPILLTNSHDGLDGPTYKKRRLDECEEAFQGTKVFVMPNGMLKSNQQLVDIIEKVKPEIRLLIEK…
	{"uid": "F8WD69", "roi": 41, "R": 1.060356647, "exp_thr": 5.0, "exp_bin": false, "source": "KC2023", "note": "CL1- (mv)", "mw": null, "orig_ambiguous": false, "orig_multi_value": true, "og_uid": "P22102;F8WD69;C9JBJ1;C9JTV6;C9JZG2;C9JKQ7", "sequence": "MAARVLIIGSGGREHTLAWKLAQSHHVKQVLVAPGNAGTACSEKISNTAISISDHTALAQFCKEKKIEFVVVGPEAPLAAGIVGNLRSAGVQCFGPTAEAAQLESSKRFAKEFMDRHGIPTAQWKAFTKPEEACSFILSADFPALV…
	{"uid": "F8WD69", "roi": 93, "R": 0.0, "exp_thr": 5.0, "exp_bin": false, "source": "KC2023", "note": "CL1- (mv)", "mw": null, "orig_ambiguous": false, "orig_multi_value": true, "og_uid": "P22102;F8WD69;C9JBJ1;C9JTV6;C9JZG2;C9JKQ7", "sequence": "MAARVLIIGSGGREHTLAWKLAQSHHVKQVLVAPGNAGTACSEKISNTAISISDHTALAQFCKEKKIEFVVVGPEAPLAAGIVGNLRSAGVQCFGPTAEAAQLESSKRFAKEFMDRHGIPTAQWKAFTKPEEACSFILSADFPALVVKASGLAA…
	{"uid": "D6RD47", "roi": 90, "R": 1.056896682, "exp_thr": 5.0, "exp_bin": false, "source": "KC2023", "note": "CL1- (mv)", "mw": null, "orig_ambiguous": false, "orig_multi_value": true, "og_uid": "P62266;D6RD47", "sequence": "MGKCRGLRTARKLRSHRRDQKWHDKQYKKAHLGTALKANPFGGASHAKGIVLEKVGVEAKQPNSAIRKCVRVQLIKNGKKITAFVPNDGCLNFIEENDEVLVAGFGRKGHAVGDIPGVRFKSFHGYSGMVEMKL", "mapped_roi": 90, "window_seq": "KITA…
	{"uid": "A0A0A0MTN0", "roi": 116, "R": 1.052937839, "exp_thr": 5.0, "exp_bin": false, "source": "KC2023", "note": "CL1- (mv)", "mw": null, "orig_ambiguous": false, "orig_multi_value": true, "og_uid": "A0A0A0MTN0;Q13617;Q5T2B5", "sequence": "MVPGKEFQHYTCTMSLKPRVVDFDETWNKLLTTIKAVVMLEYVERATWNDRFSDIYALCVAYPEPLGERLYTETKIFLENHVRHLHKRVLESEEQVLVMYHRYWEEYSKGADYMDCLYRYLNTQFIKKNKLTEADLQYGYGGVDMNEPLMEIGELALD…
	{"uid": "J3KPH4", "roi": 8, "R": 1.049240387, "exp_thr": 5.0, "exp_bin": false, "source": "KC2023", "note": "CL1- (mv)", "mw": null, "orig_ambiguous": false, "orig_multi_value": true, "og_uid": "Q13596;J3KPH4;H0YKD5", "sequence": "MASGGGGCSASERLPPPFPGLEPESEGAAGGSEPEAGDSDTEGEDIFTGAAVVSKHQSPKITTSLLPINNGSKENGIHEEQDQEPQDLFAGSHKFFEAPANL", "mapped_roi": 8, "window_seq": "MASGGGGCSASERLPPPF"}
	{"uid": "H0YKD5", "roi": 8, "R": 1.049240387, "exp_thr": 5.0, "exp_bin": false, "source": "KC2023", "note": "CL1- (mv)", "mw": null, "orig_ambiguous": false, "orig_multi_value": true, "og_uid": "Q13596;J3KPH4;H0YKD5", "sequence": "MASGGGGCSASERLPPPFPGLEPESEGAAGGSEPEAGDSDTEGEDIFTGAAVVSKHQSPKITTSLLPINNGSKENGIHEEQDQEPQDLFADKLTIVQKQTVCSKKKI", "mapped_roi": 8, "window_seq": "MASGGGGCSASERLPPPF"}
	{"uid": "H3BP35", "roi": 108, "R": 1.046613954, "exp_thr": 5.0, "exp_bin": false, "source": "KC2023", "note": "CL1- (mv)", "mw": null, "orig_ambiguous": false, "orig_multi_value": true, "og_uid": "P53602;H3BP35", "sequence": "MASEKPLAAVTCTAPVNIAVIKYWGKRDEELVLPINSSLSVTLHQDQLKTTTTAVISKDFTEDRIWLNGREEDVGQPRLQACLREIRCLARKRRNSRDGDPLPSSLSCKVHVASVNNFPTAAGLASSAAGYACLVAAGVGLSPVIPVLKRLMGEKHCRPGVQDQPGQHTYTLA…
	{"uid": "A0A6Q8PGN6", "roi": 405, "R": 1.040216463, "exp_thr": 5.0, "exp_bin": false, "source": "KC2023", "note": "CL1- (mv)", "mw": null, "orig_ambiguous": false, "orig_multi_value": true, "og_uid": "A0A6Q8PH20;A0A0C4DGB5;P20810;B7Z574;E7EVY3;A0A6Q8PG72;E9PCH5;A0A6Q8PGG5;E7ES10;A0A6Q8PFE5;A0A6Q8PFF6;H0Y7F0;E9PDE4;H0Y9H6;E7EQ12;E7EQA0;H0YD33;A0A6Q8PGN6", "sequence": "MSQPGQKPAASPRPRRAAAARRTHEVSAS…
	{"uid": "A0A3B3IRQ8", "roi": 218, "R": 1.039824708, "exp_thr": 5.0, "exp_bin": false, "source": "KC2023", "note": "CL1- (mv)", "mw": null, "orig_ambiguous": false, "orig_multi_value": true, "og_uid": "P17812;A0A3B3IRI2;B4E1E0;A0A3B3IRQ8;A0A3B3ITF6;A0A3B3ITB8", "sequence": "MKYILVTGGVISGIGKGIIASSVGTILKSCGLHVTSIKIDPYINIDAGTFSPYEHGEVFVLDDGGEVDLDLGNYERFLDIRLTKDNNLTTGKIYQYVINKERKGDYLGKTVQVVPHITDAIQEWV…
	{"uid": "A0A3B3ITF6", "roi": 218, "R": 1.039824708, "exp_thr": 5.0, "exp_bin": false, "source": "KC2023", "note": "CL1- (mv)", "mw": null, "orig_ambiguous": false, "orig_multi_value": true, "og_uid": "P17812;A0A3B3IRI2;B4E1E0;A0A3B3IRQ8;A0A3B3ITF6;A0A3B3ITB8", "sequence": "MKYILVTGGVISGIGKGIIASSVGTILKSCGLHVTSIKIDPYINIDAGTFSPYEHGEVFVLDDGGEVDLDLGNYERFLDIRLTKDNNLTTGKIYQYVINKERKGDYLGKTVQVVPHITDAIQEWV…
	{"uid": "D6RHH4", "roi": 182, "R": 1.032254764, "exp_thr": 5.0, "exp_bin": false, "source": "KC2023", "note": "CL1- (mv)", "mw": null, "orig_ambiguous": false, "orig_multi_value": true, "og_uid": "P63244;J3KPE3;H0Y8W2;D6RAC2;D6REE5;H0YAM7;D6RHH4;D6R9L0;D6R9Z1;D6RFX4;D6RBD0;H0Y8R5", "sequence": "MTEQMTLRGTLKGHNGWVTQIATTPQFPDMILSASRDKTIIMWKLTRDETNYGIPQRALRGHSHFVSDVVISSDGQFALSGSWDGTLRLWDLTTGTTTRRFVG…
	{"uid": "D6RHH4", "roi": 138, "R": 0.674268533, "exp_thr": 5.0, "exp_bin": false, "source": "KC2023", "note": "CL1- (mv)", "mw": null, "orig_ambiguous": false, "orig_multi_value": true, "og_uid": "P63244;J3KPE3;H0YAF8;H0Y8W2;H0YAM7;D6RHH4;D6R9L0;D6R9Z1;D6RFX4;D6RFZ9;D6RBD0;E9PD14;D6RAU2", "sequence": "MTEQMTLRGTLKGHNGWVTQIATTPQFPDMILSASRDKTIIMWKLTRDETNYGIPQRALRGHSHFVSDVVISSDGQFALSGSWDGTLRLWDLTTGT…
	{"uid": "K7EQ55", "roi": 85, "R": 1.030926824, "exp_thr": 5.0, "exp_bin": false, "source": "KC2023", "note": "CL1- (mv)", "mw": null, "orig_ambiguous": false, "orig_multi_value": true, "og_uid": "K7EQ55;K7EK33;Q96EP5", "sequence": "MNNSGADEIGKLFVGGLDWSTTQETLRSYFSQYGEVVDCVIMKDKTTNQSRGFGFVKFKDPNCVGTVLASRPHTLDGRNIDPKPCTPRGMQPERTRPKEGWQKGPRSDNSKSNKIFVGGIPHNCGETELREYFKKFGVVTEVVMIYDAEKQRPRGFGFITFEDEQSV…
	{"uid": "K7EK33", "roi": 85, "R": 1.030926824, "exp_thr": 5.0, "exp_bin": false, "source": "KC2023", "note": "CL1- (mv)", "mw": null, "orig_ambiguous": false, "orig_multi_value": true, "og_uid": "K7EQ55;K7EK33;Q96EP5", "sequence": "MNNSGADEIGKLFVGGLDWSTTQETLRSYFSQYGEVVDCVIMKDKTTNQSRGFGFVKFKDPNCVGTVLASRPHTLDGRNIDPKPCTPRGMQPERTRPKEGWKGPRSDNSKSNKIFVGGIPHNCGETELREYFKKFGVVTEVVMIYDAEKQRPRGFGFITFEDEQSVD…
	{"uid": "J3QK89", "roi": 69, "R": 1.029494769, "exp_thr": 5.0, "exp_bin": false, "source": "KC2023", "note": "CL1- (mv)", "mw": null, "orig_ambiguous": false, "orig_multi_value": true, "og_uid": "J3QK89;Q8IWX8", "sequence": "MEMPLPPDDQELRNVIDKLAQFVARNGPEFEKMTMEKQKDNPKFSFLFGGEFYSYYKCKLALEQQQLICKQQTPELEPAATMPPLPQPPLAPAAPIPPAQGAPSMDELIQQSQWNLQQQEQHLLALRQEQVTAAVAHAVEQQMQKLLEETQLDMNEFDNLLQPIIDTCTKDAIS…
	{"uid": "E5RHE1", "roi": 65, "R": 1.029017122, "exp_thr": 5.0, "exp_bin": false, "source": "KC2023", "note": "CL1- (mv)", "mw": null, "orig_ambiguous": false, "orig_multi_value": true, "og_uid": "Q9Y277;E5RK27;E5RFP6;E5RJN6;E5RHZ6;E5RHE1", "sequence": "MCNTPTYCDLGKAAKDVFNKGYGFGMVKIDLKTKSCSGVEFSTSGHAYTDTGKASGNLETKYKVCNYGLTFTQKWNTDNTLGTEISWENKKEEWEIEGLL", "mapped_roi": 65, "window_seq": "SGNLETKYKV…
	{"uid": "A0A1C7CYX9", "roi": 284, "R": 1.016910086, "exp_thr": 5.0, "exp_bin": false, "source": "KC2023", "note": "CL1- (mv)", "mw": null, "orig_ambiguous": false, "orig_multi_value": true, "og_uid": "A0A1C7CYX9;Q16555", "sequence": "MAERKQSGKAAEDEEVPAFFKNLGSGSPKPRQKFCGMFCPVEGSSENKTIDFDSLSVGRGSGQVVAQQRDVAHLGPDPQPPYSRQGRRAGGEPSVESGRKVEIRRASGKEALQNINDQSDRLLIKGGKIVNDDQSFYADIYMEDGLIKQIGENLIVPGGVKTIEA…
	{"uid": "A0A1C7CYX9", "roi": 609, "R": 0.71869853, "exp_thr": 5.0, "exp_bin": false, "source": "KC2023", "note": "CL1- (mv)", "mw": null, "orig_ambiguous": false, "orig_multi_value": true, "og_uid": "A0A1C7CYX9;Q16555", "sequence": "MAERKQSGKAAEDEEVPAFFKNLGSGSPKPRQKFCGMFCPVEGSSENKTIDFDSLSVGRGSGQVVAQQRDVAHLGPDPQPPYSRQGRRAGGEPSVESGRKVEIRRASGKEALQNINDQSDRLLIKGGKIVNDDQSFYADIYMEDGLIKQIGENLIVPGGVKTIEAH…
	{"uid": "H3BNF0", "roi": 54, "R": 1.013777651, "exp_thr": 5.0, "exp_bin": false, "source": "KC2023", "note": "CL1- (mv)", "mw": null, "orig_ambiguous": false, "orig_multi_value": true, "og_uid": "Q9Y5Y2;H3BNF0;H3BNS4", "sequence": "MEAAAEPGNLAGVRHIILVLSGKGGVGKSTISTELALALRHAGKKVGILDVDLCGPSIPRMLGAQGRAVHQCDRGWAPVFLDREQSISLMSVGFLLEKPDEAVVWRGPKKNALIKQFVSDVAWGELDYLVVDTPPGTSDEHMATIEALRPYQPLGALVVTTPQAVSV…
	{"uid": "H3BNF0", "roi": 72, "R": 0.854708451, "exp_thr": 5.0, "exp_bin": false, "source": "KC2023", "note": "CL1- (mv)", "mw": null, "orig_ambiguous": false, "orig_multi_value": true, "og_uid": "Q9Y5Y2;H3BNF0;H3BQR2;H3BNS4;H3BRE1", "sequence": "MEAAAEPGNLAGVRHIILVLSGKGGVGKSTISTELALALRHAGKKVGILDVDLCGPSIPRMLGAQGRAVHQCDRGWAPVFLDREQSISLMSVGFLLEKPDEAVVWRGPKKNALIKQFVSDVAWGELDYLVVDTPPGTSDEHMATIEALRPYQP…
	{"uid": "B7Z7P8", "roi": 321, "R": 1.011383099, "exp_thr": 5.0, "exp_bin": false, "source": "KC2023", "note": "CL1- (mv)", "mw": null, "orig_ambiguous": false, "orig_multi_value": true, "og_uid": "B7Z7P8;P62495", "sequence": "MKQDVLNCTEGPIHSNGTSMISLIIPPKDQISRVAKMLADEFGTASNIKSRVNRLSVLGAITSVQQRLKLYNKVPPNGLVVYCGTIVTEEGKEKKVNIDFEPFKPINTSLYLCDNKFHTEALTALLSDDSKFGFIVIDGSGALFGTLQGNTREVLHKFTVDLPKKHGRGGQSA…
	{"uid": "A0A087WWU8", "roi": 212, "R": 1.010892373, "exp_thr": 5.0, "exp_bin": false, "source": "KC2023", "note": "CL1- (mv)", "mw": null, "orig_ambiguous": false, "orig_multi_value": true, "og_uid": "A0A087WWU8;J3KN67", "sequence": "MAGITTIEAVKRKIQVLQQQADDAEERAERLQREVEGERRAREQAEAEVASLNRRIQLVEEELDRAQERLATALQKLEEAEKAADESERGMKVIENRALKDEEKMELQEIQLKEAKHIAEEADRKYEEVARKLVIIEGDLERTEERAELAESRCREMDEQIRLMD…
	{"uid": "A0A087WWU8", "roi": 170, "R": 0.946952043, "exp_thr": 5.0, "exp_bin": false, "source": "KC2023", "note": "CL1- (mv)", "mw": null, "orig_ambiguous": false, "orig_multi_value": true, "og_uid": "A0A087WWU8;J3KN67;A0A2R2Y2Q3;A0A494C0P6", "sequence": "MAGITTIEAVKRKIQVLQQQADDAEERAERLQREVEGERRAREQAEAEVASLNRRIQLVEEELDRAQERLATALQKLEEAEKAADESERGMKVIENRALKDEEKMELQEIQLKEAKHIAEEADRKYEEVARKLVIIEGDLERT…
	{"uid": "A0A087X1Z3", "roi": 106, "R": 1.010440949, "exp_thr": 5.0, "exp_bin": false, "source": "KC2023", "note": "CL1- (mv)", "mw": null, "orig_ambiguous": false, "orig_multi_value": true, "og_uid": "A0A087X1Z3;Q9UL46;H0YM70;H0YKU2", "sequence": "MAKPCGVRLSGEARKQVEVFRQNLFQEAEEFLYRFLPQKIIYLNQLLQEDSLNVADLTSLRAPLDIPIPDPPPKDDEMETDKQEKKEGKRDKRKGLNPLFLTVHKCGFLPGNEKVLSLLALVKPEVWTLKEKCILVITWIQHLIPKIEDGN…
	{"uid": "E9PEM5", "roi": 1228, "R": 1.008263937, "exp_thr": 5.0, "exp_bin": false, "source": "KC2023", "note": "CL1- (mv)", "mw": null, "orig_ambiguous": false, "orig_multi_value": true, "og_uid": "A0A494C1L5;E9PEM5;P50851;A0A494BZW2;A0A494C0R9", "sequence": "MASEDNRVPSPPPTGDDGGGGGREETPTEGGALSLKPGLPIRGIRMKFAVLTGLVEVGEVSNRDIVETVFNLLVGGQFDLEMNFIIQEGESINCMVDLLEKCDITCQAEVWSMFTAILKKSIRNLQVCTEVGLVEKVLG…
	{"uid": "A0A494C0R9", "roi": 1228, "R": 1.008263937, "exp_thr": 5.0, "exp_bin": false, "source": "KC2023", "note": "CL1- (mv)", "mw": null, "orig_ambiguous": false, "orig_multi_value": true, "og_uid": "A0A494C1L5;E9PEM5;P50851;A0A494BZW2;A0A494C0R9", "sequence": "MASEDNRVPSPPPTGDDGGGGGREETPTEGGALSLKPGLPIRGIRMKFAVLTGLVEVGEVSNRDIVETVFNLLVGGQFDLEMNFIIQEGESINCMVDLLEKCDITCQAEVWSMFTAILKKSIRNLQVCTEVGLVE…
	{"uid": "K7ES52", "roi": 66, "R": 1.004497357, "exp_thr": 5.0, "exp_bin": false, "source": "KC2023", "note": "CL1- (mv)", "mw": null, "orig_ambiguous": false, "orig_multi_value": true, "og_uid": "P04183;K7ERV3;K7ES52;K7ERJ1;K7ENW5", "sequence": "MSCINLPTVLPGSPSKTRGQIQVILGPMFSGKSTELMRRVRRFQIAQYKCLVIKYAKDTRYSSSFCTHDRNTMEALPACLLRDVAQEALGVAVIGIDEGQFFPDIVEFCEAMANAGKTVIVAALDGTFQRKPFGAILNLVPLAESVVKLTAVC…
	{"uid": "K7ES52", "roi": 3, "R": 0.593916733, "exp_thr": 5.0, "exp_bin": false, "source": "KC2023", "note": "CL1- (mv)", "mw": null, "orig_ambiguous": false, "orig_multi_value": true, "og_uid": "P04183;K7ERV3;K7ES52;K7ERJ1;K7ENW5", "sequence": "MSCINLPTVLPGSPSKTRGQIQVILGPMFSGKSTELMRRVRRFQIAQYKCLVIKYAKDTRYSSSFCTHDRNTMEALPACLLRDVAQEALGVAVIGIDEGQFFPDIVEFCEAMANAGKTVIVAALDGTFQRKPFGAILNLVPLAESVVKLTAVCM…
	{"uid": "K7ES52", "roi": 79, "R": 0.275756825, "exp_thr": 5.0, "exp_bin": false, "source": "KC2023", "note": "CL1- (mv)", "mw": null, "orig_ambiguous": false, "orig_multi_value": true, "og_uid": "P04183;K7ERV3;K7ES52;K7ERJ1", "sequence": "MSCINLPTVLPGSPSKTRGQIQVILGPMFSGKSTELMRRVRRFQIAQYKCLVIKYAKDTRYSSSFCTHDRNTMEALPACLLRDVAQEALGVAVIGIDEGQFFPDIVEFCEAMANAGKTVIVAALDGTFQRKPFGAILNLVPLAESVVKLTAVCMECFREA…
	{"uid": "K7ENW5", "roi": 66, "R": 1.004497357, "exp_thr": 5.0, "exp_bin": false, "source": "KC2023", "note": "CL1- (mv)", "mw": null, "orig_ambiguous": false, "orig_multi_value": true, "og_uid": "P04183;K7ERV3;K7ES52;K7ERJ1;K7ENW5", "sequence": "MSCINLPTVLPGSPSKTRGQIQVILGPMFSGKSTELMRRVRRFQIAQYKCLVIKYAKDTRYSSSFCTHDRSLTSWSSARPWPTPGRP", "mapped_roi": 66, "window_seq": "AKDTRYSSSFCTHDRSLTSWS"}
	{"uid": "K7ENW5", "roi": 3, "R": 0.593916733, "exp_thr": 5.0, "exp_bin": false, "source": "KC2023", "note": "CL1- (mv)", "mw": null, "orig_ambiguous": false, "orig_multi_value": true, "og_uid": "P04183;K7ERV3;K7ES52;K7ERJ1;K7ENW5", "sequence": "MSCINLPTVLPGSPSKTRGQIQVILGPMFSGKSTELMRRVRRFQIAQYKCLVIKYAKDTRYSSSFCTHDRSLTSWSSARPWPTPGRP", "mapped_roi": 3, "window_seq": "MSCINLPTVLPGS"}
	{"uid": "A0A7I2V457", "roi": 376, "R": 0.998889183, "exp_thr": 5.0, "exp_bin": false, "source": "KC2023", "note": "CL1- (mv)", "mw": null, "orig_ambiguous": false, "orig_multi_value": true, "og_uid": "Q96RS6;A0A7I2V457", "sequence": "MEVAANCSLRVKRPLLDPRFEGYKLSLEPLPCYQLELDAAVAEVKLRDDQYTLEHMHAFGMYNYLHCDSWYQDSVYYIDTLGRIMNLTVMLDTALGKPREVFRLPTDLTACDNRLCASIHFSSSTWVTLSDGTGRLYVIGTGERGNSASEKWEIMFNEELGDPFI…
	{"uid": "A0A7I2V457", "roi": 111, "R": 0.838587176, "exp_thr": 5.0, "exp_bin": false, "source": "KC2023", "note": "CL1- (mv)", "mw": null, "orig_ambiguous": false, "orig_multi_value": true, "og_uid": "Q96RS6;A0A7I2V457", "sequence": "MEVAANCSLRVKRPLLDPRFEGYKLSLEPLPCYQLELDAAVAEVKLRDDQYTLEHMHAFGMYNYLHCDSWYQDSVYYIDTLGRIMNLTVMLDTALGKPREVFRLPTDLTACDNRLCASIHFSSSTWVTLSDGTGRLYVIGTGERGNSASEKWEIMFNEELGDPFI…
	{"uid": "A0A7I2V457", "roi": 7, "R": 0.670610774, "exp_thr": 5.0, "exp_bin": false, "source": "KC2023", "note": "CL1- (mv)", "mw": null, "orig_ambiguous": false, "orig_multi_value": true, "og_uid": "Q96RS6;A0A7I2V457;A0A7I2V4C4;E5RGX7", "sequence": "MEVAANCSLRVKRPLLDPRFEGYKLSLEPLPCYQLELDAAVAEVKLRDDQYTLEHMHAFGMYNYLHCDSWYQDSVYYIDTLGRIMNLTVMLDTALGKPREVFRLPTDLTACDNRLCASIHFSSSTWVTLSDGTGRLYVIGTGERGNSAS…
	{"uid": "A0A6Q8PF02", "roi": 631, "R": 0.996567829, "exp_thr": 5.0, "exp_bin": false, "source": "KC2023", "note": "CL1- (mv)", "mw": null, "orig_ambiguous": false, "orig_multi_value": true, "og_uid": "A0A6Q8PF02;P81274;A0A6Q8PGW7", "sequence": "MFVTEMGVSLYCPGKSQTPGLKQSSCLSLQSSRNYRMEASCLELALEGERLCKSGDCRAGVSFFEAAVQVGTEDLKTLSAIYSQLGNAYFYLHDYAKALEYHHHDLTLARTIGDQLGEAKASGNLGNTLKVLGNFDEAIVCCQRHLDISRELND…
	{"uid": "A0A6Q8PF02", "roi": 533, "R": 0.516896251, "exp_thr": 5.0, "exp_bin": false, "source": "KC2023", "note": "CL1- (mv)", "mw": null, "orig_ambiguous": false, "orig_multi_value": true, "og_uid": "A0A6Q8PF02;P81274;A0A6Q8PFD2;A0A6Q8PGW7;H0Y4A4;A0A2R8Y6E3", "sequence": "MFVTEMGVSLYCPGKSQTPGLKQSSCLSLQSSRNYRMEASCLELALEGERLCKSGDCRAGVSFFEAAVQVGTEDLKTLSAIYSQLGNAYFYLHDYAKALEYHHHDLTLARTIGDQLGEAKASGNL…
	{"uid": "A0A6Q8PF02", "roi": 178, "R": 0.282154254, "exp_thr": 5.0, "exp_bin": false, "source": "KC2023", "note": "CL1- (mv)", "mw": null, "orig_ambiguous": false, "orig_multi_value": true, "og_uid": "A0A6Q8PF02;P81274;A0A6Q8PFD2;A0A6Q8PGW7;H0Y4A4;A0A6Q8PGU2;A0A2R8YCX1;A0A6Q8PGS6;Q5T1N9", "sequence": "MFVTEMGVSLYCPGKSQTPGLKQSSCLSLQSSRNYRMEASCLELALEGERLCKSGDCRAGVSFFEAAVQVGTEDLKTLSAIYSQLGNAYFYLHDYA…
	{"uid": "E7EVA0", "roi": 552, "R": 0.996355236, "exp_thr": 5.0, "exp_bin": false, "source": "KC2023", "note": "CL1- (mv)", "mw": null, "orig_ambiguous": false, "orig_multi_value": true, "og_uid": "E7EVA0;P27816", "sequence": "MADLSLADALTEPSPDIEGEIKRDFIATLEAEAFDDVVGETVGKTDYIPLLDVDEKTGNSESKKKPCSETSQIEDLPLPPHPASLSFHLPLDTPSSKPTLLANGGHGVEGSDTTGSPTEFLEEKMAYQEYPNSQNWPEDTNFCFQPEQVVDPIQTDPFKMYHDDDLADLVFPS…
	{"uid": "E7EVA0", "roi": 652, "R": 0.372081564, "exp_thr": 5.0, "exp_bin": false, "source": "KC2023", "note": "CL1- (mv)", "mw": null, "orig_ambiguous": false, "orig_multi_value": true, "og_uid": "E7EVA0;P27816", "sequence": "MADLSLADALTEPSPDIEGEIKRDFIATLEAEAFDDVVGETVGKTDYIPLLDVDEKTGNSESKKKPCSETSQIEDLPLPPHPASLSFHLPLDTPSSKPTLLANGGHGVEGSDTTGSPTEFLEEKMAYQEYPNSQNWPEDTNFCFQPEQVVDPIQTDPFKMYHDDDLADLVFPS…
	{"uid": "M0R0C6", "roi": 436, "R": 0.988948519, "exp_thr": 5.0, "exp_bin": false, "source": "KC2023", "note": "CL1- (mv)", "mw": null, "orig_ambiguous": false, "orig_multi_value": true, "og_uid": "M0R0C6;Q92945;A0A087WTP3;M0R3J3", "sequence": "MSDYSTGGPPPGPPPPAGGGGGAGGAGGGPPPGPPGAGDRGGGGPGGGGPGGGSAGGPSQPPGGGGPGIRKDAFADAVQRARQIAAKIGGDAATTVNNSTPDFGFGGQKRQLEDGDQPESKKLASQGDSISSQLGPIHPPPRTSMTEEYRVPDGM…
	{"uid": "M0R0C6", "roi": 379, "R": 0.0, "exp_thr": 5.0, "exp_bin": false, "source": "KC2023", "note": "CL1- (mv)", "mw": null, "orig_ambiguous": false, "orig_multi_value": true, "og_uid": "M0R0C6;Q92945;A0A087WTP3", "sequence": "MSDYSTGGPPPGPPPPAGGGGGAGGAGGGPPPGPPGAGDRGGGGPGGGGPGGGSAGGPSQPPGGGGPGIRKDAFADAVQRARQIAAKIGGDAATTVNNSTPDFGFGGQKRQLEDGDQPESKKLASQGDSISSQLGPIHPPPRTSMTEEYRVPDGMVGLIIGRGGEQINKI…
	{"uid": "H0YNW5", "roi": 137, "R": 0.984191127, "exp_thr": 5.0, "exp_bin": false, "source": "KC2023", "note": "CL1- (mv)", "mw": null, "orig_ambiguous": false, "orig_multi_value": true, "og_uid": "H0YNW5;H0YKC5;P33316;A0A0C4DGL3;H0YMP1", "sequence": "MAAGGAAPETPAISPSKRARPAEVGGMQLRFARLSEHATAPTRGSARAAGYDLYSAYDYTIPPMEKAVVKTDIQIALPSGCYGRVAPRSGLAAKHFIDVGAGVIDEDYRGNVGVVLFNFGKEKFEVKKGDRIAQLICERIFYPEIEEV…
	{"uid": "Q5BKV1", "roi": 172, "R": 0.983444335, "exp_thr": 5.0, "exp_bin": false, "source": "KC2023", "note": "CL1- (mv)", "mw": null, "orig_ambiguous": false, "orig_multi_value": true, "og_uid": "P35579;Q5BKV1;A0A494C024;P35580;E7ERA5;Q7Z406;A0A2R8Y4C3;M0QY43", "sequence": "MAQQAADKYLYVDKNFINNPLAQADWAAKKLVWVPSDKSGFEPASLKEEVGEEAIVELVENGKKVKVNKDDIQKMNPPKFSKVEDMAELTCLNEASVLHNLKERYYSGLIYTYSGLFCVVINP…
	{"uid": "Q5BKV1", "roi": 91, "R": 0.549275697, "exp_thr": 5.0, "exp_bin": false, "source": "KC2023", "note": "CL1- (mv)", "mw": null, "orig_ambiguous": false, "orig_multi_value": true, "og_uid": "P35579;Q5BKV1;B1AH99;P35580;E7ERA5", "sequence": "MAQQAADKYLYVDKNFINNPLAQADWAAKKLVWVPSDKSGFEPASLKEEVGEEAIVELVENGKKVKVNKDDIQKMNPPKFSKVEDMAELTCLNEASVLHNLKERYYSGLIYTYSGLFCVVINPYKNLPIYSEEIVEMYKGKKRHEMPPHIYAI…
	{"uid": "A0A3B3IS71", "roi": 438, "R": 0.980911939, "exp_thr": 5.0, "exp_bin": false, "source": "KC2023", "note": "CL1- (mv)", "mw": null, "orig_ambiguous": false, "orig_multi_value": true, "og_uid": "A0A3B3IS71;P06400", "sequence": "MPPKTPRKTAATAAAAAAEPPAPPPPPPPEEDPEQDSGPEDLPLVRLEFEETEEPDFTALCQKLKIPDHVRERAWLTWEKVSSVDGVLGGYIQKKKELWGICIFIAAVDLDEMSFTFTELQKNIEISVHKFFNLLKEIDTSTKVDNAMSRLLKKYDVLFALFSKL…
	{"uid": "A0A3B3IS71", "roi": 853, "R": 0.0, "exp_thr": 5.0, "exp_bin": false, "source": "KC2023", "note": "CL1- (mv)", "mw": null, "orig_ambiguous": false, "orig_multi_value": true, "og_uid": "A0A3B3IS71;P06400", "sequence": "MPPKTPRKTAATAAAAAAEPPAPPPPPPPEEDPEQDSGPEDLPLVRLEFEETEEPDFTALCQKLKIPDHVRERAWLTWEKVSSVDGVLGGYIQKKKELWGICIFIAAVDLDEMSFTFTELQKNIEISVHKFFNLLKEIDTSTKVDNAMSRLLKKYDVLFALFSKLERTCELIY…
	{"uid": "R4GMT0", "roi": 34, "R": 0.977678718, "exp_thr": 5.0, "exp_bin": false, "source": "KC2023", "note": "CL1- (mv)", "mw": null, "orig_ambiguous": false, "orig_multi_value": true, "og_uid": "P42025;P61163;R4GMT0;A0A1B0GVS3", "sequence": "MESYDVIANQPVVIDNGSGVIKAGFAGDQIPKYCFPNYVGRPKHVRVMAGALEGDIFIGPKAEEHRGLLSIRYPMEHGIVKDWNDMERIWQYVYSKDQLQTFSEEHPVLLTEAPLNPRKNRERAAEVFFETFNVPALFISMQAVLSLYATGRTTGV…
	{"uid": "A0A1B0GVS3", "roi": 34, "R": 0.977678718, "exp_thr": 5.0, "exp_bin": false, "source": "KC2023", "note": "CL1- (mv)", "mw": null, "orig_ambiguous": false, "orig_multi_value": true, "og_uid": "P42025;P61163;R4GMT0;A0A1B0GVS3", "sequence": "MESYDVIANQPVVIDNGSGVIKAGFAGDQIPKYCFPNYVGRPKHVRVMAGALEGDIFIGPKAEEHRGLLSIRYPMEHGIVKDWNDMERIWQYVYSKDQLQTFSEEHPVLLTEAPLNPRKNRERAAEVFFETFNVPALFISMQAVLSLYATGR…
	{"uid": "J3QRL5", "roi": 32, "R": 0.974727305, "exp_thr": 5.0, "exp_bin": false, "source": "KC2023", "note": "CL1- (mv)", "mw": null, "orig_ambiguous": false, "orig_multi_value": true, "og_uid": "P62993;J3KT38;J3QRL5", "sequence": "MEAIAKYDFKATADDELSFKRGDILKVLNEECDQNWYKAELNGKDGFIPKNYIEMKPHPWFFGKIPRAKAEEMLSKQRHDGAFLIRESESAPGDFSLSVNSRHTSRPSLTLIPRRMESWASAGEILSMSWITQTPTGGKELATGRPACFPAIMSPP", "mapped_…
	{"uid": "A0A0B4J1V9", "roi": 205, "R": 0.972331771, "exp_thr": 5.0, "exp_bin": false, "source": "KC2023", "note": "CL1- (mv)", "mw": null, "orig_ambiguous": false, "orig_multi_value": true, "og_uid": "A0A0B4J1V9;Q9NRZ9;A0A087WSW7;F6XU50", "sequence": "MPAERPAGSGGSEAPAMVEQLDTAVITPAMLEEEEQLEAAGLERERKMLEKARMSWDRESTEIRYRRLQHLLEKSNIYSKFLLTKMEQQQLEEQKKKEKLERKKESLKVKKGKNSIDASEEKPVMRKKRGREDESYNISEVMSKEEI…
	{"uid": "A0A0B4J1V9", "roi": 169, "R": 0.657150847, "exp_thr": 5.0, "exp_bin": false, "source": "KC2023", "note": "CL1- (mv)", "mw": null, "orig_ambiguous": false, "orig_multi_value": true, "og_uid": "A0A0B4J1V9;Q9NRZ9;A0A087WSW7;F6XU50;B1ALG6", "sequence": "MPAERPAGSGGSEAPAMVEQLDTAVITPAMLEEEEQLEAAGLERERKMLEKARMSWDRESTEIRYRRLQHLLEKSNIYSKFLLTKMEQQQLEEQKKKEKLERKKESLKVKKGKNSIDASEEKPVMRKKRGREDESYNISE…
	{"uid": "A0A0B4J1V9", "roi": 882, "R": 0.623938507, "exp_thr": 5.0, "exp_bin": false, "source": "KC2023", "note": "CL1- (mv)", "mw": null, "orig_ambiguous": false, "orig_multi_value": true, "og_uid": "A0A0B4J1V9;Q9NRZ9;A0A087WSW7;F6XU50", "sequence": "MPAERPAGSGGSEAPAMVEQLDTAVITPAMLEEEEQLEAAGLERERKMLEKARMSWDRESTEIRYRRLQHLLEKSNIYSKFLLTKMEQQQLEEQKKKEKLERKKESLKVKKGKNSIDASEEKPVMRKKRGREDESYNISEVMSKEEI…
	{"uid": "A0A3B3IRT3", "roi": 496, "R": 0.97208773, "exp_thr": 5.0, "exp_bin": false, "source": "KC2023", "note": "CL1- (mv)", "mw": null, "orig_ambiguous": false, "orig_multi_value": true, "og_uid": "A0A3B3IRT3;Q5JU47", "sequence": "MKEDAKPSKDNEDAFYNSQKFEVLYCGKVTVTHKKAPSSLIDDCMEKFSLHEQQRLKIQGEQRGPDPGEDLADLEVVVPGSPGDCLPEEADGTDTHLGLPAGASQPALTSSRVCFPERILEDSGFDEQQEFRSRCSSVTGVQRRVHEGSQKSQPRRRHASAPSHVQ…
	{"uid": "A0A3B3IRT3", "roi": 135, "R": 0.662008748, "exp_thr": 5.0, "exp_bin": false, "source": "KC2023", "note": "CL1- (mv)", "mw": null, "orig_ambiguous": false, "orig_multi_value": true, "og_uid": "A0A3B3IRT3;O60343", "sequence": "MKEDAKPSKDNEDAFYNSQKFEVLYCGKVTVTHKKAPSSLIDDCMEKFSLHEQQRLKIQGEQRGPDPGEDLADLEVVVPGSPGDCLPEEADGTDTHLGLPAGASQPALTSSRVCFPERILEDSGFDEQQEFRSRCSSVTGVQRRVHEGSQKSQPRRRHASAPSHV…
	{"uid": "A0A3B3IT07", "roi": 40, "R": 0.970881198, "exp_thr": 5.0, "exp_bin": false, "source": "KC2023", "note": "CL1- (mv)", "mw": null, "orig_ambiguous": false, "orig_multi_value": true, "og_uid": "Q8WUM4;A0A3B3IT07;C9IZF9;F8WEQ7;F8WBR8", "sequence": "MATFISVQLKKTSEVDLAKPLVKFIQQTYPSGGEEQAQYCRAAEELSKLRRAAVGRPLDKHEGALETLLRYYDQICSIEPKFPFSENQICLTFTWKDAFDKGSLFGGSVKLALASLGYEKSCVLFNCAALASQIAAEQNLDNDEG…
	{"uid": "A0A3B3IT07", "roi": 76, "R": 0.888779699, "exp_thr": 5.0, "exp_bin": false, "source": "KC2023", "note": "CL1- (mv)", "mw": null, "orig_ambiguous": false, "orig_multi_value": true, "og_uid": "Q8WUM4;A0A3B3IT07;C9IZF9", "sequence": "MATFISVQLKKTSEVDLAKPLVKFIQQTYPSGGEEQAQYCRAAEELSKLRRAAVGRPLDKHEGALETLLRYYDQICSIEPKFPFSENQICLTFTWKDAFDKGSLFGGSVKLALASLGYEKSCVLFNCAALASQIAAEQNLDNDEGLKIAAKHYQFASGA…
	{"uid": "C9IZF9", "roi": 40, "R": 0.970881198, "exp_thr": 5.0, "exp_bin": false, "source": "KC2023", "note": "CL1- (mv)", "mw": null, "orig_ambiguous": false, "orig_multi_value": true, "og_uid": "Q8WUM4;A0A3B3IT07;C9IZF9;F8WEQ7;F8WBR8", "sequence": "MATFISVQLKKTSEVDLAKPLVKFIQQTYPSGGEEQAQYCRAAEELSKLRRAAVGRPLDKHEGALETLLRYYDQICSIEPKFPFSENQNLDNDEGLKIAAKHYQFASGAFLHIKETVLSALSREPTVDISPDTVGTLSLIMLAQAQEVF…
	{"uid": "C9IZF9", "roi": 76, "R": 0.888779699, "exp_thr": 5.0, "exp_bin": false, "source": "KC2023", "note": "CL1- (mv)", "mw": null, "orig_ambiguous": false, "orig_multi_value": true, "og_uid": "Q8WUM4;A0A3B3IT07;C9IZF9", "sequence": "MATFISVQLKKTSEVDLAKPLVKFIQQTYPSGGEEQAQYCRAAEELSKLRRAAVGRPLDKHEGALETLLRYYDQICSIEPKFPFSENQNLDNDEGLKIAAKHYQFASGAFLHIKETVLSALSREPTVDISPDTVGTLSLIMLAQAQEVFFLKA", "mapped…
	{"uid": "F8WEQ7", "roi": 40, "R": 0.970881198, "exp_thr": 5.0, "exp_bin": false, "source": "KC2023", "note": "CL1- (mv)", "mw": null, "orig_ambiguous": false, "orig_multi_value": true, "og_uid": "Q8WUM4;A0A3B3IT07;C9IZF9;F8WEQ7;F8WBR8", "sequence": "MATFISVQLKKTSEVDLAKPLVKFIQQTYPSGGEEQAQYCRAAEELSKLRRAAVGRPLDKHEGALETLLRSA", "mapped_roi": 40, "window_seq": "PSGGEEQAQYCRAAEELSKLR"}
	{"uid": "F8WBR8", "roi": 40, "R": 0.970881198, "exp_thr": 5.0, "exp_bin": false, "source": "KC2023", "note": "CL1- (mv)", "mw": null, "orig_ambiguous": false, "orig_multi_value": true, "og_uid": "Q8WUM4;A0A3B3IT07;C9IZF9;F8WEQ7;F8WBR8", "sequence": "MATFISVQLKKTSEVDLAKPLVKFIQQTYPSGGEEQAQYCRAAEELSKLRRAAVGRPLDKHEGALETLLRLVSNSGLK", "mapped_roi": 40, "window_seq": "PSGGEEQAQYCRAAEELSKLR"}
	{"uid": "K7ELW0", "roi": 53, "R": 0.97042402, "exp_thr": 5.0, "exp_bin": false, "source": "KC2023", "note": "CL1- (mv)", "mw": null, "orig_ambiguous": false, "orig_multi_value": true, "og_uid": "Q99497;K7ELW0;K7EN27", "sequence": "MASKRALVILAKGAEEMETVIPVDVMRRAGIKVTVAGLAGKDPVQCSRDVVICPDASLEDAKKESAAVKEILKEQENRKGLIAAICAGPTALLAHEIGFGSKVTTHPLAKDKMMNGGHYTYSENRVEKDGLILTSRGPGTSFEFALAIVEALNGKEVAAQVKAPLVLK…
	{"uid": "F5H875", "roi": 209, "R": 0.969947765, "exp_thr": 5.0, "exp_bin": false, "source": "KC2023", "note": "CL1- (mv)", "mw": null, "orig_ambiguous": false, "orig_multi_value": true, "og_uid": "F5H875;A0A6Q8PFF8", "sequence": "MDDTLFQLKFTAKQLEKLAKKAEKDSKAEQAKVKKALLQKNVECARVYAENAIRKKNEGVNWLRMASRVDAVASKVQTAVTMKGVTKNMAQVTKALDKALSTMDLQKVSSVMDRFEQQVQNLDVHTSSMPLPPGDGGLHELGHHPDHAAGAGGQPHHADRRGEWPGGAG…
	{"uid": "A0A0A0MRG9", "roi": 249, "R": 0.966217203, "exp_thr": 5.0, "exp_bin": false, "source": "KC2023", "note": "CL1- (mv)", "mw": null, "orig_ambiguous": false, "orig_multi_value": true, "og_uid": "Q96SN8;A0A0A0MRG9;F8WCI3;F8WF55;F8WBJ0", "sequence": "MMDLVLEEDVTVPGTLSGCSGLVPSVPDDLDGINPNAGLGNGLLPNVSEETVSPTRARNMKDFENQITELKKENFNLKLRIYFLEERMQQEFHGPTEHIYKTNIELKVEVESLKRELQEREQLLIKASKAVESLAEAGGSEIQR…
	{"uid": "E9PHA6", "roi": 843, "R": 0.964815185, "exp_thr": 5.0, "exp_bin": false, "source": "KC2023", "note": "CL1- (mv)", "mw": null, "orig_ambiguous": false, "orig_multi_value": true, "og_uid": "P43246;A0A2R8YFH0;E9PHA6;A0A2R8Y6P0;A0A2R8YG02;A0A2R8Y713", "sequence": "MAVQPKETLQLESAAEVGFVRFFQGMPEKPTTTVRLFDRGDFYTAHGEDALLAAREVFKTQGVIKYMGPAGAKNLQSVVLSKMNFESFVKDLLLVRQYRVEVYKNRAGNKASKENDWYLAYKASPGNLS…
	{"uid": "E9PHA6", "roi": 843, "R": 0.964815185, "exp_thr": 5.0, "exp_bin": false, "source": "KC2023", "note": "CL1- (mv)", "mw": null, "orig_ambiguous": false, "orig_multi_value": true, "og_uid": "P43246;A0A2R8YFH0;E9PHA6;A0A2R8Y6P0;A0A2R8YG02;A0A2R8Y713", "sequence": "MAVQPKETLQLESAAEVGFVRFFQGMPEKPTTTVRLFDRGDFYTAHGEDALLAAREVFKTQGVIKYMGPAGAKNLQSVVLSKMNFESFVKDLLLVRQYRVEVYKNRAGNKASKENDWYLAYKASPGNLS…
	{"uid": "A0A2R8Y6P0", "roi": 843, "R": 0.964815185, "exp_thr": 5.0, "exp_bin": false, "source": "KC2023", "note": "CL1- (mv)", "mw": null, "orig_ambiguous": false, "orig_multi_value": true, "og_uid": "P43246;A0A2R8YFH0;E9PHA6;A0A2R8Y6P0;A0A2R8YG02;A0A2R8Y713", "sequence": "MAVQPKETLQLESAAEVGFVRFFQGMPEKPTTTVRLFDRGDFYTAHGEDALLAAREVFKTQGVIKYMGPAGAKNLQSVVLSKMNFESFVKDLLLVRQYRVEVYKNRAGNKASKENDWYLAYKASP…
	{"uid": "A0A2R8YG02", "roi": 843, "R": 0.964815185, "exp_thr": 5.0, "exp_bin": false, "source": "KC2023", "note": "CL1- (mv)", "mw": null, "orig_ambiguous": false, "orig_multi_value": true, "og_uid": "P43246;A0A2R8YFH0;E9PHA6;A0A2R8Y6P0;A0A2R8YG02;A0A2R8Y713", "sequence": "MAVQPKETLQLESAAEVGFVRFFQGMPEKPTTTVRLFDRGDFYTAHGEDALLAAREVFKTQGVIKYMGPAGAKNLQSVVLSKMNFESFVKDLLLVRQYRVEVYKNRAGNKASKENDWYLAYKASP…
	{"uid": "A0A2R8Y713", "roi": 843, "R": 0.964815185, "exp_thr": 5.0, "exp_bin": false, "source": "KC2023", "note": "CL1- (mv)", "mw": null, "orig_ambiguous": false, "orig_multi_value": true, "og_uid": "P43246;A0A2R8YFH0;E9PHA6;A0A2R8Y6P0;A0A2R8YG02;A0A2R8Y713", "sequence": "MAVQPKETLQLESAAEVGFVRFFQGMPEKPTTTVRLFDRGDFYTAHGEDALLAAREVFKTQGVIKYMGPAGAKNLQSVVLSKMNFESFVKDLLLVRQYRVEVYKNRAGNKASKENDWYLAYKASP…
	{"uid": "A8MXB7", "roi": 147, "R": 0.959936117, "exp_thr": 5.0, "exp_bin": false, "source": "KC2023", "note": "CL1- (mv)", "mw": null, "orig_ambiguous": false, "orig_multi_value": true, "og_uid": "A8MXB7;Q9Y343", "sequence": "MEVYIPSFRYEESDLERGYTVVIVWHRAFQTKMESYEVIVLEIAFSNGRLTYQVFKIEVLMNGRKHFVEKRYSEFHALHKKLKKCIKTPEIPSKHVRNWVPKVLEQRRQGLETYLQAVILENEELPKLFLDFLNVRHLPSLPKAESCGSFDETESEESSKLSHQPVLLFLRDP…
	{"uid": "Q1RLN5", "roi": 199, "R": 0.956092829, "exp_thr": 5.0, "exp_bin": false, "source": "KC2023", "note": "CL1- (mv)", "mw": null, "orig_ambiguous": false, "orig_multi_value": true, "og_uid": "Q1RLN5;Q8IWW6", "sequence": "MKMADRSGKIIPGQVYIEVEYDYEYEAKDRKIVIKQGERYILVKKTNDDWWQVKPDENSKAFYVPAQYVKEVTRKALMPPVKQVAGLPNNSTKIMQSLHLQRSTENVNKLPELSSFGKPSSSVQGTGLIRDANQNFGPSYNQGQTVNLSLDLTHNNGKFNNDSHSPKVSSQNR…
	{"uid": "M0R117", "roi": 22, "R": 0.955323556, "exp_thr": 5.0, "exp_bin": false, "source": "KC2023", "note": "CL1- (mv)", "mw": null, "orig_ambiguous": false, "orig_multi_value": true, "og_uid": "Q02543;M0R117", "sequence": "MKASGTLREYKVVGRCLPTPKCHTPPLYRMRIFAPNHVVAKSRFWYFVSQLKKMKKSSGEIVYCGQVFEKSPLRVKNFGIWLRYDSRSGTHNMYREYRDLTTAGAVTQCYRDMGARHRARAHSIQIMKVEEIAASKCRRPHKPRFTTKRPNTFF", "mapped_roi": 22,…
	{"uid": "M0R117", "roi": 109, "R": 0.874163592, "exp_thr": 5.0, "exp_bin": false, "source": "KC2023", "note": "CL1- (mv)", "mw": null, "orig_ambiguous": false, "orig_multi_value": true, "og_uid": "Q02543;M0R3D6;M0R1A7;M0R117;M0R0P7", "sequence": "MKASGTLREYKVVGRCLPTPKCHTPPLYRMRIFAPNHVVAKSRFWYFVSQLKKMKKSSGEIVYCGQVFEKSPLRVKNFGIWLRYDSRSGTHNMYREYRDLTTAGAVTQCYRDMGARHRARAHSIQIMKVEEIAASKCRRPHKPRFTTKRPNT…
	{"uid": "M0R117", "roi": 64, "R": 0.52300826, "exp_thr": 5.0, "exp_bin": false, "source": "KC2023", "note": "CL1- (mv)", "mw": null, "orig_ambiguous": false, "orig_multi_value": true, "og_uid": "Q02543;M0R3D6;M0R1A7;M0R117;M0R0P7", "sequence": "MKASGTLREYKVVGRCLPTPKCHTPPLYRMRIFAPNHVVAKSRFWYFVSQLKKMKKSSGEIVYCGQVFEKSPLRVKNFGIWLRYDSRSGTHNMYREYRDLTTAGAVTQCYRDMGARHRARAHSIQIMKVEEIAASKCRRPHKPRFTTKRPNTFF…
	{"uid": "M0R117", "roi": 64, "R": 0.504196749, "exp_thr": 5.0, "exp_bin": false, "source": "KC2023", "note": "CL1- (mv)", "mw": null, "orig_ambiguous": false, "orig_multi_value": true, "og_uid": "Q02543;M0R3D6;M0R1A7;M0R117;M0R0P7", "sequence": "MKASGTLREYKVVGRCLPTPKCHTPPLYRMRIFAPNHVVAKSRFWYFVSQLKKMKKSSGEIVYCGQVFEKSPLRVKNFGIWLRYDSRSGTHNMYREYRDLTTAGAVTQCYRDMGARHRARAHSIQIMKVEEIAASKCRRPHKPRFTTKRPNTF…
	{"uid": "E7ET15", "roi": 65, "R": 0.951417182, "exp_thr": 5.0, "exp_bin": false, "source": "KC2023", "note": "CL1- (mv)", "mw": null, "orig_ambiguous": false, "orig_multi_value": true, "og_uid": "O15042;E7ET15;E7EW00;H0Y8D9;U3KPT1;C9JDJ7;C9J5L1", "sequence": "MADKTPGGSQKASSKTRSSDVHSSGSSDAHMDASGPSDSDMPSRTRPKSPRKHNYRNESARESLCDSPHQNLSRPLLENKLKAFSIGKMSTAKRTLSKKEQEELKKKEDEKAAAEIYEEFLAAFEGSDGNKVKTFVRGG…
	{"uid": "E7EW00", "roi": 65, "R": 0.951417182, "exp_thr": 5.0, "exp_bin": false, "source": "KC2023", "note": "CL1- (mv)", "mw": null, "orig_ambiguous": false, "orig_multi_value": true, "og_uid": "O15042;E7ET15;E7EW00;H0Y8D9;U3KPT1;C9JDJ7;C9J5L1", "sequence": "MADKTPGGSQKASSKTRSSDVHSSGSSDAHMDASGPSDSDMPSRTRPKSPRKHNYRNESARESLCDSPHQNLSRPLLENKLKAFSIGKMSTAKRTLSKKEQEELKKKEDEKAAAEIYEEFLAAFEGSDGNKVKTFVRGG…
	{"uid": "F8WBK9", "roi": 53, "R": 0.951097398, "exp_thr": 5.0, "exp_bin": false, "source": "KC2023", "note": "CL1- (mv)", "mw": null, "orig_ambiguous": false, "orig_multi_value": true, "og_uid": "Q9UEW8;F8WBK9;O95747;C9JIG9", "sequence": "MSEDSSALPWSINRDDYELQEVIGSGATAVVQAAYCAPKKEKVAIKRINLEKCQTSMDELLKEIQAMSQCHHPNIVSYYTSFVVKDELWLVMKLLSGVTHWRNWIALLKALFI", "mapped_roi": 53, "window_seq": "VAIKRINLEKC…
	{"uid": "C9JIG9", "roi": 53, "R": 0.951097398, "exp_thr": 5.0, "exp_bin": false, "source": "KC2023", "note": "CL1- (mv)", "mw": null, "orig_ambiguous": false, "orig_multi_value": true, "og_uid": "Q9UEW8;F8WBK9;O95747;C9JIG9", "sequence": "MSEDSSALPWSINRDDYELQEVIGSGATAVVQAAYCAPKKEKVAIKRINLEKCQTSMDELLKEIQAMSQCHHPNIVSYYTSFVVKDELWLVMKLLSGGSVLDIIKHIVAKGEHKSGVLDESTIATILREVLEGLEYLHKNGQIHRDVKAGNILLGEDGSV…
	{"uid": "H3BTP7", "roi": 96, "R": 0.946344053, "exp_thr": 5.0, "exp_bin": false, "source": "KC2023", "note": "CL1- (mv)", "mw": null, "orig_ambiguous": false, "orig_multi_value": true, "og_uid": "P36578;H3BTP7;H3BU31", "sequence": "MACARPLISVYSEKGESSGKNVTLPAVFKAPIRPDIVNFVHTNLRKNNRQPYAVSELAGHQTSAESWGTGRAVARIPRVRGGGTHRSGQGAFGNMCRGGRMFAPTKTWRRWHRRVNTTQKRYAICSALAASALPALVMSKVEDKVEGYKKTKEAVLLLKKLKAWNDI…
	{"uid": "H3BTP7", "roi": 125, "R": 0.864643427, "exp_thr": 5.0, "exp_bin": false, "source": "KC2023", "note": "CL1- (mv)", "mw": null, "orig_ambiguous": false, "orig_multi_value": true, "og_uid": "P36578;H3BM89;H3BTP7", "sequence": "MACARPLISVYSEKGESSGKNVTLPAVFKAPIRPDIVNFVHTNLRKNNRQPYAVSELAGHQTSAESWGTGRAVARIPRVRGGGTHRSGQGAFGNMCRGGRMFAPTKTWRRWHRRVNTTQKRYAICSALAASALPALVMSKVEDKVEGYKKTKEAVLLLKKLKAWND…
	{"uid": "H3BTP7", "roi": 3, "R": 0.639722472, "exp_thr": 5.0, "exp_bin": false, "source": "KC2023", "note": "CL1- (mv)", "mw": null, "orig_ambiguous": false, "orig_multi_value": true, "og_uid": "P36578;H3BTP7;H3BU31", "sequence": "MACARPLISVYSEKGESSGKNVTLPAVFKAPIRPDIVNFVHTNLRKNNRQPYAVSELAGHQTSAESWGTGRAVARIPRVRGGGTHRSGQGAFGNMCRGGRMFAPTKTWRRWHRRVNTTQKRYAICSALAASALPALVMSKVEDKVEGYKKTKEAVLLLKKLKAWNDIK…
	{"uid": "H3BTP7", "roi": 3, "R": 0.53340403, "exp_thr": 5.0, "exp_bin": false, "source": "KC2023", "note": "CL1- (mv)", "mw": null, "orig_ambiguous": false, "orig_multi_value": true, "og_uid": "P36578;H3BTP7;H3BU31", "sequence": "MACARPLISVYSEKGESSGKNVTLPAVFKAPIRPDIVNFVHTNLRKNNRQPYAVSELAGHQTSAESWGTGRAVARIPRVRGGGTHRSGQGAFGNMCRGGRMFAPTKTWRRWHRRVNTTQKRYAICSALAASALPALVMSKVEDKVEGYKKTKEAVLLLKKLKAWNDIKK…
	{"uid": "H3BU31", "roi": 96, "R": 0.946344053, "exp_thr": 5.0, "exp_bin": false, "source": "KC2023", "note": "CL1- (mv)", "mw": null, "orig_ambiguous": false, "orig_multi_value": true, "og_uid": "P36578;H3BTP7;H3BU31", "sequence": "MACARPLISVYSEKGESSGKNVTLPAVFKAPIRPDIVNFVHTNLRKNNRQPYAVSELAGHQTSAESWGTGRAVARIPRVRGGGTHRSGQGAFGNMCRGGRMFAPTKTWRRWHRRKNPLKNLRIMLKLNPYAKTMRRNTILRQARNHKLRVDKAAAAAAALQAKSDEK…
	{"uid": "H3BU31", "roi": 3, "R": 0.639722472, "exp_thr": 5.0, "exp_bin": false, "source": "KC2023", "note": "CL1- (mv)", "mw": null, "orig_ambiguous": false, "orig_multi_value": true, "og_uid": "P36578;H3BTP7;H3BU31", "sequence": "MACARPLISVYSEKGESSGKNVTLPAVFKAPIRPDIVNFVHTNLRKNNRQPYAVSELAGHQTSAESWGTGRAVARIPRVRGGGTHRSGQGAFGNMCRGGRMFAPTKTWRRWHRRKNPLKNLRIMLKLNPYAKTMRRNTILRQARNHKLRVDKAAAAAAALQAKSDEKA…
	{"uid": "H3BU31", "roi": 3, "R": 0.53340403, "exp_thr": 5.0, "exp_bin": false, "source": "KC2023", "note": "CL1- (mv)", "mw": null, "orig_ambiguous": false, "orig_multi_value": true, "og_uid": "P36578;H3BTP7;H3BU31", "sequence": "MACARPLISVYSEKGESSGKNVTLPAVFKAPIRPDIVNFVHTNLRKNNRQPYAVSELAGHQTSAESWGTGRAVARIPRVRGGGTHRSGQGAFGNMCRGGRMFAPTKTWRRWHRRKNPLKNLRIMLKLNPYAKTMRRNTILRQARNHKLRVDKAAAAAAALQAKSDEKAA…
	{"uid": "M0R210", "roi": 25, "R": 0.943520007, "exp_thr": 5.0, "exp_bin": false, "source": "KC2023", "note": "CL1- (mv)", "mw": null, "orig_ambiguous": false, "orig_multi_value": true, "og_uid": "P62249;M0R210;M0R3H0;M0R1M5;Q6IPX4", "sequence": "MPSKGPLQSVQVFGRKKTATAVAHCKRGNGLIKLLEPVLLLGKERFAGVDIRVRVKGGGHVAQIYAIRQSISKALVAYYQKYVDEASKKEIKDILIQYDRTLLVADPRRCESKKFGGPGARARYQKSYR", "mapped_roi": 25, "wi…
	{"uid": "M0R3H0", "roi": 25, "R": 0.943520007, "exp_thr": 5.0, "exp_bin": false, "source": "KC2023", "note": "CL1- (mv)", "mw": null, "orig_ambiguous": false, "orig_multi_value": true, "og_uid": "P62249;M0R210;M0R3H0;M0R1M5;Q6IPX4", "sequence": "MPSKGPLQSVQVFGRKKTATAVAHCKRGNGLIKVNGRPLEMIEPRTLQYKLLEPVLLLGKERFAGVDIRVRVKGGGHVAQIYAIRQSISKALVAYYQKCE", "mapped_roi": 25, "window_seq": "RKKTATAVAHCKRGNGL…
	{"uid": "Q6IPX4", "roi": 25, "R": 0.943520007, "exp_thr": 5.0, "exp_bin": false, "source": "KC2023", "note": "CL1- (mv)", "mw": null, "orig_ambiguous": false, "orig_multi_value": true, "og_uid": "P62249;M0R210;M0R3H0;M0R1M5;Q6IPX4", "sequence": "MPSKGPLQSVQVFGRKKTATAVAHCKRGNGLIKVNGRPLEMIEPRTLQYKLLEPVLLLGKERFAGVDIRVRVKGGGHVAQIYGESQELGAWRRWLWEGGLHSAPVPFNCVSFSQLSVSPSPKPWWPITRNMWMRLPRRRSKTSSSSMTGPCW"…
	{"uid": "H0YJP0", "roi": 936, "R": 0.940169417, "exp_thr": 5.0, "exp_bin": false, "source": "KC2023", "note": "CL1- (mv)", "mw": null, "orig_ambiguous": false, "orig_multi_value": true, "og_uid": "Q9ULT8;H0YJP0", "sequence": "MADVDPDTLLEWLQMGQGDERDMQLIALEQLCMLLLMSDNVDRCFETCPPRTFLPALCKIFLDESAPDNVLEVTARAITYYLDVSAECTRRIVGVDGAIKALCNRLVVVELNNRTSRDLAEQCVKVLELICTRESGAVFEAGGLNCVLTFIRDSGHLVHKDTLHSAMAVVSRL…
	{"uid": "Q5JW54", "roi": 283, "R": 0.936503984, "exp_thr": 5.0, "exp_bin": false, "source": "KC2023", "note": "CL1- (mv)", "mw": null, "orig_ambiguous": false, "orig_multi_value": true, "og_uid": "Q5JW54;Q9H410", "sequence": "MTSVTRSEIIDEQSASYQDRRQSWRRASMKETNRRKSLHPIHQGITELSRSISVDLAESKRLGCLLLSSFQFSIQKLEPFLRDTKGFSLESFRAKASSLSEELKHFADGLETDGTLQKCFEDSNGKASDFSLEASVAEMKEYITKFSLERQTWDQLLLHYQQEAKEILSRGST…
	{"uid": "A0A1W2PRF5", "roi": 361, "R": 0.932696081, "exp_thr": 5.0, "exp_bin": false, "source": "KC2023", "note": "CL1- (mv)", "mw": null, "orig_ambiguous": false, "orig_multi_value": true, "og_uid": "Q96EB1;A0A1X7SBS0;A0A1W2PP47;A0A1W2PRF5;A0A1W2PR08;A0A1W2PS93;A0A1W2PPP6;A0A1W2PRJ0;A0A1W2PRF0;A0A1W2PQZ6;A0A1W2PNY5;G5E9D4;A0A1W2PNW2;A0A1W2PNY4", "sequence": "MAAVATCGSVAASTGSAVATASKSNVTSFQRRGPRAS…
	{"uid": "A0A1W2PR08", "roi": 361, "R": 0.932696081, "exp_thr": 5.0, "exp_bin": false, "source": "KC2023", "note": "CL1- (mv)", "mw": null, "orig_ambiguous": false, "orig_multi_value": true, "og_uid": "Q96EB1;A0A1X7SBS0;A0A1W2PP47;A0A1W2PRF5;A0A1W2PR08;A0A1W2PS93;A0A1W2PPP6;A0A1W2PRJ0;A0A1W2PRF0;A0A1W2PQZ6;A0A1W2PNY5;G5E9D4;A0A1W2PNW2;A0A1W2PNY4", "sequence": "MAAVATCGSVAASTGSAVATASKSNVTSFQRRGPRAS…
	{"uid": "A0A1W2PPP6", "roi": 361, "R": 0.932696081, "exp_thr": 5.0, "exp_bin": false, "source": "KC2023", "note": "CL1- (mv)", "mw": null, "orig_ambiguous": false, "orig_multi_value": true, "og_uid": "Q96EB1;A0A1X7SBS0;A0A1W2PP47;A0A1W2PRF5;A0A1W2PR08;A0A1W2PS93;A0A1W2PPP6;A0A1W2PRJ0;A0A1W2PRF0;A0A1W2PQZ6;A0A1W2PNY5;G5E9D4;A0A1W2PNW2;A0A1W2PNY4", "sequence": "MAAVATCGSVAASTGSAVATASKSNVTSFQRRGPRAS…
	{"uid": "A0A1W2PRF0", "roi": 361, "R": 0.932696081, "exp_thr": 5.0, "exp_bin": false, "source": "KC2023", "note": "CL1- (mv)", "mw": null, "orig_ambiguous": false, "orig_multi_value": true, "og_uid": "Q96EB1;A0A1X7SBS0;A0A1W2PP47;A0A1W2PRF5;A0A1W2PR08;A0A1W2PS93;A0A1W2PPP6;A0A1W2PRJ0;A0A1W2PRF0;A0A1W2PQZ6;A0A1W2PNY5;G5E9D4;A0A1W2PNW2;A0A1W2PNY4", "sequence": "MAAVATCGSVAASTGSAVATASKSNVTSFQRRGPRAS…
	{"uid": "A0A1W2PQZ6", "roi": 361, "R": 0.932696081, "exp_thr": 5.0, "exp_bin": false, "source": "KC2023", "note": "CL1- (mv)", "mw": null, "orig_ambiguous": false, "orig_multi_value": true, "og_uid": "Q96EB1;A0A1X7SBS0;A0A1W2PP47;A0A1W2PRF5;A0A1W2PR08;A0A1W2PS93;A0A1W2PPP6;A0A1W2PRJ0;A0A1W2PRF0;A0A1W2PQZ6;A0A1W2PNY5;G5E9D4;A0A1W2PNW2;A0A1W2PNY4", "sequence": "MAAVATCGSVAASTGSAVATASKSNVTSFQRRGPRAS…
	{"uid": "A0A1W2PNY5", "roi": 361, "R": 0.932696081, "exp_thr": 5.0, "exp_bin": false, "source": "KC2023", "note": "CL1- (mv)", "mw": null, "orig_ambiguous": false, "orig_multi_value": true, "og_uid": "Q96EB1;A0A1X7SBS0;A0A1W2PP47;A0A1W2PRF5;A0A1W2PR08;A0A1W2PS93;A0A1W2PPP6;A0A1W2PRJ0;A0A1W2PRF0;A0A1W2PQZ6;A0A1W2PNY5;G5E9D4;A0A1W2PNW2;A0A1W2PNY4", "sequence": "MAAVATCGSVAASTGSAVATASKSNVTSFQRRGPRAS…
	{"uid": "G5E9D4", "roi": 361, "R": 0.932696081, "exp_thr": 5.0, "exp_bin": false, "source": "KC2023", "note": "CL1- (mv)", "mw": null, "orig_ambiguous": false, "orig_multi_value": true, "og_uid": "Q96EB1;A0A1X7SBS0;A0A1W2PP47;A0A1W2PRF5;A0A1W2PR08;A0A1W2PS93;A0A1W2PPP6;A0A1W2PRJ0;A0A1W2PRF0;A0A1W2PQZ6;A0A1W2PNY5;G5E9D4;A0A1W2PNW2;A0A1W2PNY4", "sequence": "MAAVATCGSVAASTGSAVATASKSNVTSFQRRGPRASVTND…
	{"uid": "J3QTA2", "roi": 272, "R": 0.925609337, "exp_thr": 5.0, "exp_bin": false, "source": "KC2023", "note": "CL1- (mv)", "mw": null, "orig_ambiguous": false, "orig_multi_value": true, "og_uid": "J3QTA2;Q99933", "sequence": "LAQRGGARRPRGDRERLGSRLRALRPGREPRQSEPPAQRGPPPSGRPPARSTASGHDRPTRGAAAGARRPRMKKKTRRRSTRSEELTRSEELTLSEEATWSEEATQSEEATQGEEMNRSQEVTRDEESTRSEEVTREEMAAAGLTVTVTHSNEKHDLHVTSQQGSSEPVVQDL…
	{"uid": "A0A0G2JQX1", "roi": 670, "R": 0.923781398, "exp_thr": 5.0, "exp_bin": false, "source": "KC2023", "note": "CL1- (mv)", "mw": null, "orig_ambiguous": false, "orig_multi_value": true, "og_uid": "A0A0G2JQX1;A0A0G2JPW5;A0A0G2JSA7;A0A087X1Z1;Q96RT8", "sequence": "MARHGPPWSRLDAQQERDVRELVRGVAGLQDEADPNFQLALNFAWSNFRFHRFLDVNSHKIEKTIEGIYEKFVIHSDLSKAASWKRLTEEFLNAPLPSIKEIKTDAHYSILSLLLCLSDSPSNSSYVETPRN…
	{"uid": "A0A0G2JPW5", "roi": 670, "R": 0.923781398, "exp_thr": 5.0, "exp_bin": false, "source": "KC2023", "note": "CL1- (mv)", "mw": null, "orig_ambiguous": false, "orig_multi_value": true, "og_uid": "A0A0G2JQX1;A0A0G2JPW5;A0A0G2JSA7;A0A087X1Z1;Q96RT8", "sequence": "MARHGPPWSRLDAQQERDVRELVRGVAGLQDEADPNFQLALNFAWSNFRFHRFLDVNSHKIEKTIEGIYEKFVIHSDLSKAASWKRLTEEFLNAPLPSIKEIKTDAHYSILSLLLCLSDSPSNSSYVETPRN…
	{"uid": "A0A0G2JSA7", "roi": 670, "R": 0.923781398, "exp_thr": 5.0, "exp_bin": false, "source": "KC2023", "note": "CL1- (mv)", "mw": null, "orig_ambiguous": false, "orig_multi_value": true, "og_uid": "A0A0G2JQX1;A0A0G2JPW5;A0A0G2JSA7;A0A087X1Z1;Q96RT8", "sequence": "MARHGPPWSRLDAQQERDVRELVRGVAGLQDEADPNFQLALNFAWSNFRFHRFLDVNSHKIEKTIEGIYEKFVIHSDLSKAASWKRLTEEFLNAPLPSIKEIKTDAHYSILSLLLCLSDSPSNSSYVETPRN…
	{"uid": "A0A087X1Z1", "roi": 670, "R": 0.923781398, "exp_thr": 5.0, "exp_bin": false, "source": "KC2023", "note": "CL1- (mv)", "mw": null, "orig_ambiguous": false, "orig_multi_value": true, "og_uid": "A0A0G2JQX1;A0A0G2JPW5;A0A0G2JSA7;A0A087X1Z1;Q96RT8", "sequence": "MARHGPPWSRLDAQQERDVRELVRGVAGLQDEADPNFQLALNFAWSNFRFHRFLDVNSHKIEKTIEGIYEKFVIHSDLSKAASWKRLTEEFLNAPLPSIKEIKTDAHYSILSLLLCLSDSPSNSSYVETPRN…
	{"uid": "J3QSV6", "roi": 47, "R": 0.922765612, "exp_thr": 5.0, "exp_bin": false, "source": "KC2023", "note": "CL1- (mv)", "mw": null, "orig_ambiguous": false, "orig_multi_value": true, "og_uid": "J3QSV6;O76021;I3L3C4;I3L3U9;I3L1A3", "sequence": "MEDSASASLSSAAATGTSTSTPAAPTARKQLDKEQVRKAVDALLTHCKSRKNNYGLLLNENESLFLMVVLWKIPSKELRVRLTLPHSIRSDSEDICLFTKDEPNSTPEKTEQFYRKLLNKHGIKTVSQIISLQTLKKEYKSYEAKLRLLSSFD…
	{"uid": "I3L3U9", "roi": 47, "R": 0.922765612, "exp_thr": 5.0, "exp_bin": false, "source": "KC2023", "note": "CL1- (mv)", "mw": null, "orig_ambiguous": false, "orig_multi_value": true, "og_uid": "J3QSV6;O76021;I3L3C4;I3L3U9;I3L1A3", "sequence": "MEDSASASLSSAAATGTSTSTPAAPTARKQLDKEQVRKAVDALLTHCKSRKNNYGLLLNENESLFLMVVLWKIPSKELRVRLTLPHSIRSDSEDICLFTKDEPNSTPEKTEQFYRKLLNKHGIKTVSQIISLQTLKKEYKSYEAKLRLLSSFD…
	{"uid": "F5H437", "roi": 38, "R": 0.920342432, "exp_thr": 5.0, "exp_bin": false, "source": "KC2023", "note": "CL1- (mv)", "mw": null, "orig_ambiguous": false, "orig_multi_value": true, "og_uid": "P24385;F5H437", "sequence": "MEHQLLCCEVETIRRAYPDANLLNDRVLRAMLKAEETCAPSVSYFKCVQKEVLPSMRKIVATWMLEM", "mapped_roi": 38, "window_seq": "LRAMLKAEETCAPSVSYFKCV"}
	{"uid": "Q9H361", "roi": 339, "R": 0.918362585, "exp_thr": 5.0, "exp_bin": false, "source": "KC2023", "note": "CL1- (mv)", "mw": null, "orig_ambiguous": false, "orig_multi_value": true, "og_uid": "P11940;A0A7I2YQ88;H0YAR2;E7EQV3;A0A7I2V649;A0A7I2V4N4;A0A7I2YQE4;E7ERJ7;A0A7I2YQ90;A0A087WTT1;Q9H361;H0YB86;Q4VXU2;A0A6Q8JFT6;A0A6I8PLA1;A0A6I8PS38;A0A7I2V4L7;A0A7I2V5W9;H0YEU6;A0A7I2V4V6;A0A7I2V598;H0Y…
	{"uid": "Q9H361", "roi": 339, "R": 3.541306755, "exp_thr": 4.0, "exp_bin": false, "source": "KC2023", "note": "CL-Sc- (mv)", "mw": null, "orig_ambiguous": false, "orig_multi_value": true, "og_uid": "Q13310;P11940;Q9H361;Q4VXU2", "sequence": "MNPSTPSYPTASLYVGDLHPDVTEAMLYEKFSPAGPILSIRICRDLITSGSSNYAYVNFQHTKDAEHALDTMNFDVIKGKPVRIMWSQRDPSLRKSGVGNIFVKNLDKSINNKALYDTVSAFGNILSCNVVCDENGSKGYGFVHFETHEAAERAIKK…
	{"uid": "Q9H361", "roi": 339, "R": 0.848695507, "exp_thr": 4.0, "exp_bin": false, "source": "KC2023", "note": "CL-Sc- (mv)", "mw": null, "orig_ambiguous": false, "orig_multi_value": true, "og_uid": "Q13310;P11940;Q9H361", "sequence": "MNPSTPSYPTASLYVGDLHPDVTEAMLYEKFSPAGPILSIRICRDLITSGSSNYAYVNFQHTKDAEHALDTMNFDVIKGKPVRIMWSQRDPSLRKSGVGNIFVKNLDKSINNKALYDTVSAFGNILSCNVVCDENGSKGYGFVHFETHEAAERAIKKMNGMLLN…
	{"uid": "A0A6Q8JFT6", "roi": 339, "R": 0.918362585, "exp_thr": 5.0, "exp_bin": false, "source": "KC2023", "note": "CL1- (mv)", "mw": null, "orig_ambiguous": false, "orig_multi_value": true, "og_uid": "P11940;A0A7I2YQ88;H0YAR2;E7EQV3;A0A7I2V649;A0A7I2V4N4;A0A7I2YQE4;E7ERJ7;A0A7I2YQ90;A0A087WTT1;Q9H361;H0YB86;Q4VXU2;A0A6Q8JFT6;A0A6I8PLA1;A0A6I8PS38;A0A7I2V4L7;A0A7I2V5W9;H0YEU6;A0A7I2V4V6;A0A7I2V598…
	{"uid": "A0A6Q8JFT6", "roi": 339, "R": 3.541306755, "exp_thr": 4.0, "exp_bin": false, "source": "KC2023", "note": "CL-Sc- (mv)", "mw": null, "orig_ambiguous": false, "orig_multi_value": true, "og_uid": "Q13310;P11940;Q9H361;Q4VXU2", "sequence": "MNASGSGYPLASLYVGDLHPDVTEAMLYEKFSPAGPILSIRVCRDVATRRSLGYAYINFQQPADAERALDTMNFEMLKGQPIRIMWSQRDPGLRKSGVGNIFIKNLEDSIDNKALYDTFSTFGNILSCKVACDEHGSRGFGFVHFETHEAAQQ…
	{"uid": "A0A6Q8JFT6", "roi": 339, "R": 0.918362585, "exp_thr": 5.0, "exp_bin": false, "source": "KC2023", "note": "CL1- (mv)", "mw": null, "orig_ambiguous": false, "orig_multi_value": true, "og_uid": "P11940;A0A7I2YQ88;H0YAR2;E7EQV3;A0A7I2V649;A0A7I2V4N4;A0A7I2YQE4;E7ERJ7;A0A7I2YQ90;A0A087WTT1;Q9H361;H0YB86;Q4VXU2;A0A6Q8JFT6;A0A6I8PLA1;A0A6I8PS38;A0A7I2V4L7;A0A7I2V5W9;H0YEU6;A0A7I2V4V6;A0A7I2V598…
	{"uid": "H3BNW0", "roi": 31, "R": 0.914932681, "exp_thr": 5.0, "exp_bin": false, "source": "KC2023", "note": "CL1- (mv)", "mw": null, "orig_ambiguous": false, "orig_multi_value": true, "og_uid": "Q9NXG2;H3BNW0", "sequence": "MAAPAQQTTQPGGGKRKGKAQYVLAKRARRCDAGGPRQLEPGLQGILITCNMNERKCVEEAYSLLNEYGDDMYGPEKFTDKDQQPSGSEGEDDDAEAALKKEVGDIKASTEMRLRRFQSVESGANNVVFIRTLGIGKQQHGVTVG", "mapped_roi": 31, "window_…
	{"uid": "Q8WU40", "roi": 309, "R": 0.912183177, "exp_thr": 5.0, "exp_bin": false, "source": "KC2023", "note": "CL1- (mv)", "mw": null, "orig_ambiguous": false, "orig_multi_value": true, "og_uid": "Q8WU40;Q5SWX3;A0A2Q3DQE3;H0Y6G2;Q13555", "sequence": "RLLKHPNIVRLHDSISEEGFHYLVFDLVTGGELFEDIVAREYYSEADASHCIHQILESVNHIHQHDIVHRDLKPENLLLASKCKGAAVKLADFGLAIEVQGEQQAWFGFAGTPGYLSPEVLRKDPYGKPVDIWACGVILYILLVGYPP…
	{"uid": "A0A087X0S7", "roi": 275, "R": 0.911137244, "exp_thr": 5.0, "exp_bin": false, "source": "KC2023", "note": "CL1- (mv)", "mw": null, "orig_ambiguous": false, "orig_multi_value": true, "og_uid": "A0A0B4J2G4;Q15345;A0A0C4DH00;A0A087WTU1;A0A087X0S7", "sequence": "MEATSREAAPAKSSASGPNAPPALFELCGRAVSAHMGVLESGVWALPGPILQSILPLLNIYYLERIEETALKKGLSTQAIWRRLWDELMKTRPSSLESVTCWRAKFMEAFFSHVLRGTIDVSSDRRLCDQRF…
	{"uid": "A0A7P0TA78", "roi": 856, "R": 0.906748294, "exp_thr": 5.0, "exp_bin": false, "source": "KC2023", "note": "CL1- (mv)", "mw": null, "orig_ambiguous": false, "orig_multi_value": true, "og_uid": "A0A7P0TA78;A0A7P0TAC5;P42858;A0A7P0TAN5;A0A7P0Z417;A0A3B3ISR3", "sequence": "MRKKELSATKKDRVNHCLTICENIVAQSVRNSPEFQKLLGIAMELFLLCSDDAESDVRMVADECLNKVIKALMDSNLPRLQLELYKEIKKNGAPRSLRAALWRFAELAHLVRPQKCRPYLV…
	{"uid": "A0A7P0TA78", "roi": 578, "R": 0.0, "exp_thr": 5.0, "exp_bin": false, "source": "KC2023", "note": "CL1- (mv)", "mw": null, "orig_ambiguous": false, "orig_multi_value": true, "og_uid": "A0A7P0TA78;A0A7P0TAC5;P42858;A0A7P0TAN5;A0A7P0Z417", "sequence": "MRKKELSATKKDRVNHCLTICENIVAQSVRNSPEFQKLLGIAMELFLLCSDDAESDVRMVADECLNKVIKALMDSNLPRLQLELYKEIKKNGAPRSLRAALWRFAELAHLVRPQKCRPYLVNLLPCLTRTSKRPEESVQE…
	{"uid": "A0A7P0TAC5", "roi": 856, "R": 0.906748294, "exp_thr": 5.0, "exp_bin": false, "source": "KC2023", "note": "CL1- (mv)", "mw": null, "orig_ambiguous": false, "orig_multi_value": true, "og_uid": "A0A7P0TA78;A0A7P0TAC5;P42858;A0A7P0TAN5;A0A7P0Z417;A0A3B3ISR3", "sequence": "MRKKELSATKKDRVNHCLTICENIVAQSVRNSPEFQKLLGIAMELFLLCSDDAESDVRMVADECLNKVIKALMDSNLPRLQLELYKEIKKNGAPRSLRAALWRFAELAHLVRPQKCRPYLV…
	{"uid": "A0A7P0TAC5", "roi": 578, "R": 0.0, "exp_thr": 5.0, "exp_bin": false, "source": "KC2023", "note": "CL1- (mv)", "mw": null, "orig_ambiguous": false, "orig_multi_value": true, "og_uid": "A0A7P0TA78;A0A7P0TAC5;P42858;A0A7P0TAN5;A0A7P0Z417", "sequence": "MRKKELSATKKDRVNHCLTICENIVAQSVRNSPEFQKLLGIAMELFLLCSDDAESDVRMVADECLNKVIKALMDSNLPRLQLELYKEIKKNGAPRSLRAALWRFAELAHLVRPQKCRPYLVNLLPCLTRTSKRPEESVQE…
	{"uid": "A0A7P0TAN5", "roi": 856, "R": 0.906748294, "exp_thr": 5.0, "exp_bin": false, "source": "KC2023", "note": "CL1- (mv)", "mw": null, "orig_ambiguous": false, "orig_multi_value": true, "og_uid": "A0A7P0TA78;A0A7P0TAC5;P42858;A0A7P0TAN5;A0A7P0Z417;A0A3B3ISR3", "sequence": "MRKKELSATKKDRVNHCLTICENIVAQSVRNSPEFQKLLGIAMELFLLCSDDAESDVRMVADECLNKVIKALMDSNLPRLQLELYKEIKKNGAPRSLRAALWRFAELAHLVRPQKCRPYLV…
	{"uid": "A0A7P0TAN5", "roi": 578, "R": 0.0, "exp_thr": 5.0, "exp_bin": false, "source": "KC2023", "note": "CL1- (mv)", "mw": null, "orig_ambiguous": false, "orig_multi_value": true, "og_uid": "A0A7P0TA78;A0A7P0TAC5;P42858;A0A7P0TAN5;A0A7P0Z417", "sequence": "MRKKELSATKKDRVNHCLTICENIVAQSVRNSPEFQKLLGIAMELFLLCSDDAESDVRMVADECLNKVIKALMDSNLPRLQLELYKEIKKNGAPRSLRAALWRFAELAHLVRPQKCRPYLVNLLPCLTRTSKRPEESVQE…
	{"uid": "A0A7P0Z417", "roi": 856, "R": 0.906748294, "exp_thr": 5.0, "exp_bin": false, "source": "KC2023", "note": "CL1- (mv)", "mw": null, "orig_ambiguous": false, "orig_multi_value": true, "og_uid": "A0A7P0TA78;A0A7P0TAC5;P42858;A0A7P0TAN5;A0A7P0Z417;A0A3B3ISR3", "sequence": "MRKKELSATKKDRVNHCLTICENIVAQSVRNSPEFQKLLGIAMELFLLCSDDAESDVRMVADECLNKVIKALMDSNLPRLQLELYKEIKKNGAPRSLRAALWRFAELAHLVRPQKCRPYLV…
	{"uid": "A0A7P0Z417", "roi": 578, "R": 0.0, "exp_thr": 5.0, "exp_bin": false, "source": "KC2023", "note": "CL1- (mv)", "mw": null, "orig_ambiguous": false, "orig_multi_value": true, "og_uid": "A0A7P0TA78;A0A7P0TAC5;P42858;A0A7P0TAN5;A0A7P0Z417", "sequence": "MRKKELSATKKDRVNHCLTICENIVAQSVRNSPEFQKLLGIAMELFLLCSDDAESDVRMVADECLNKVIKALMDSNLPRLQLELYKEIKKNGAPRSLRAALWRFAELAHLVRPQKCRPYLVNLLPCLTRTSKRPEESVQE…
	{"uid": "E9PGT1", "roi": 220, "R": 0.906691387, "exp_thr": 5.0, "exp_bin": false, "source": "KC2023", "note": "CL1- (mv)", "mw": null, "orig_ambiguous": false, "orig_multi_value": true, "og_uid": "E9PGT1;Q15631", "sequence": "MPVIPAFWEAEAARSPEEIRKVVQSLEQTAREILTLLQGVHQGAGFQDIPKRCLKAREHFGTVKTHLTSLKTKFPAEQYYRFHEHWRFVLQRLVFLAAFVVYLETETLVTREAVTEILGIEPDREKGFHLDVEDYLSGVLILASELSRLSVNSVTAGDYSRPLHISTFINELD…
	{"uid": "A0A494C0S5", "roi": 15, "R": 0.904952411, "exp_thr": 5.0, "exp_bin": false, "source": "KC2023", "note": "CL1- (mv)", "mw": null, "orig_ambiguous": false, "orig_multi_value": true, "og_uid": "Q9BTA9;A0A494C0S5;J3QT76;C9JD58", "sequence": "MVMYARKQQRLSDGCHDRRGDSQPYQGGDVLQALKYSSKSHPSSGDHRHEKMRDAGDPSPPNKMLRRSDSPENKYSDSTGHSKAKNVHTHRVRERDGGTSYSPQENSHNHSALHSSNSHSSNPSNNPSKTSDAPYDSADDWSEHISSSGKKY…
	{"uid": "J3QT76", "roi": 15, "R": 0.904952411, "exp_thr": 5.0, "exp_bin": false, "source": "KC2023", "note": "CL1- (mv)", "mw": null, "orig_ambiguous": false, "orig_multi_value": true, "og_uid": "Q9BTA9;A0A494C0S5;J3QT76;C9JD58", "sequence": "MVMYARKQQRLSDGCHDRRGDSQPYQVTGGSSLI", "mapped_roi": 15, "window_seq": "ARKQQRLSDGCHDRRGDSQPY"}
	{"uid": "C9JD58", "roi": 15, "R": 0.904952411, "exp_thr": 5.0, "exp_bin": false, "source": "KC2023", "note": "CL1- (mv)", "mw": null, "orig_ambiguous": false, "orig_multi_value": true, "og_uid": "Q9BTA9;A0A494C0S5;J3QT76;C9JD58", "sequence": "MVMYARKQQRLSDGCHDRRGDSQPYQVPAEAGVEGLEGAGGGREGLLLERRPQKSIQALRCNTSETSTADPLKIPGT", "mapped_roi": 15, "window_seq": "ARKQQRLSDGCHDRRGDSQPY"}
	{"uid": "A0A499FI31", "roi": 688, "R": 0.900892525, "exp_thr": 5.0, "exp_bin": false, "source": "KC2023", "note": "CL1- (mv)", "mw": null, "orig_ambiguous": false, "orig_multi_value": true, "og_uid": "A0A499FI31;Q15020", "sequence": "MATAAETSASEPEAESKAGPKADGEEDEVKAARTRRKVLSRAVAAATYKTMGPAWDQQEEGVSESDGDEYAMASSAESSPGEYEWEYDEEEEKNQLEIERLEEQLSINVYDYNCHVDLIRLLRLEGELTKVRMARQKMSEIFPLTEELWLEWLHDEISMAQDGLD…
	{"uid": "D6R9X9", "roi": 37, "R": 0.886093558, "exp_thr": 5.0, "exp_bin": false, "source": "KC2023", "note": "CL1- (mv)", "mw": null, "orig_ambiguous": false, "orig_multi_value": true, "og_uid": "D6R9X9;D6RG19;P61927", "sequence": "MTKGTSSFGKRRNKTHTLCRRCGSKAYHLQKSTCGKCGYPAKRKRKCMDSVKEQHLNPRGQLLQHPVHLKNVND", "mapped_roi": 37, "window_seq": "YHLQKSTCGKCGYPAKRKRKC"}
	{"uid": "D6RG19", "roi": 37, "R": 0.886093558, "exp_thr": 5.0, "exp_bin": false, "source": "KC2023", "note": "CL1- (mv)", "mw": null, "orig_ambiguous": false, "orig_multi_value": true, "og_uid": "D6R9X9;D6RG19;P61927", "sequence": "MTKGTSSFGKRRNKTHTLCRRCGSKAYHLQKSTCGKCGYPAKRKRKYNWSAKAKRRNTTGTGRMRHLKIVYRRFRYSLYVRS", "mapped_roi": 37, "window_seq": "YHLQKSTCGKCGYPAKRKRKY"}
	{"uid": "Q5T1Z4", "roi": 1088, "R": 0.882279813, "exp_thr": 5.0, "exp_bin": false, "source": "KC2023", "note": "CL1- (mv)", "mw": null, "orig_ambiguous": false, "orig_multi_value": true, "og_uid": "Q14671;H0YEH2;E9PR38;Q5T1Z4;Q5T1Z8;H0YDK8;H0YC97;H0YDC5;A0A0C4DG68;Q8TB72", "sequence": "MSVACVLKRKAVLWQDSFSPHLKHHPQEPANPNMPVVLTSGTGSQAQPQPAANQALAAGTHSSPVPGSIGVAGRSQDDAMVDYFFQRQHGEQLGGGGSGGGGYNNSKHRWPT…
	{"uid": "K7ENB7", "roi": 7, "R": 0.881708893, "exp_thr": 5.0, "exp_bin": false, "source": "KC2023", "note": "CL1- (mv)", "mw": null, "orig_ambiguous": false, "orig_multi_value": true, "og_uid": "Q99615;A0A6I8PU73;A0A6I8PIK4;A0A6I8PR89;A0A6I8PU89;K7ESP1;K7ELJ8;K7ENB7", "sequence": "MAAAAECDVVMAATEPELLDDQEAKSPTPLTSHPSVPLL", "mapped_roi": 7, "window_seq": "MAAAAECDVVMAATEPE"}
	{"uid": "G3XAM7", "roi": 116, "R": 0.880990564, "exp_thr": 5.0, "exp_bin": false, "source": "KC2023", "note": "CL1- (mv)", "mw": null, "orig_ambiguous": false, "orig_multi_value": true, "og_uid": "P35221;G3XAM7;E5RIB1;E5RG03;E5RGY6;E5RHV7;E5RJ41", "sequence": "MTAVHAGNINFKWDPKSLEIRTLAVERLLEPLVTQVTTLVNTNSKGPSNKKRGRSKKAHVLAASVEQATENFLEKGDKIAKESQFLKEELVAAVEDVRKQGDLMKAAAGEFADDPCSSVKRGNMVRAARALLSAVTRL…
	{"uid": "B5MCF9", "roi": 255, "R": 0.87593128, "exp_thr": 5.0, "exp_bin": false, "source": "KC2023", "note": "CL1- (mv)", "mw": null, "orig_ambiguous": false, "orig_multi_value": true, "og_uid": "B5MCF9;O00541;B3KXD6", "sequence": "MGGLEKKKYERGSATNYITRNKARKKLQLSLADFRRLCILKGIYPHEPKHKKKVNKGSTAARTFYLIKDIRFLLHEPIVNKFREYKVFVRKLRKAYGKSEWNTVERLKDNKPNYKLDHIIKERYPTFIDALRDLDDALSMCFLFSTFPRTGKCHVQTIQLCRRLTVE…
	{"uid": "C9JTC6", "roi": 14, "R": 0.872977781, "exp_thr": 5.0, "exp_bin": false, "source": "KC2023", "note": "CL1- (mv)", "mw": null, "orig_ambiguous": false, "orig_multi_value": true, "og_uid": "Q32MZ4;C9JTC6", "sequence": "MTSPAAAQSREIDCLSPEAQKLAEARLAAKRAARAEAREIRMKELERQQKEEDSERYSRRSRRNTSASDEDERMSVGSRGSLRTNGYDGELYGSQSLNRRSGRVEERPEKDFTEKGSRNMPGLSAATLASLGGTSSRRGSGDTSISIDT", "mapped_roi": 14, "win…
	{"uid": "J3KNB8", "roi": 596, "R": 0.86846866, "exp_thr": 5.0, "exp_bin": false, "source": "KC2023", "note": "CL1- (mv)", "mw": null, "orig_ambiguous": false, "orig_multi_value": true, "og_uid": "J3KNB8;F5H538;Q9Y6R4;F5H4R1", "sequence": "MREAAAALVPPPAFAVTPAAAMEEPPPPPPPPPPPPEPETESEPECCLAARQEGTLGDSACKSPESDLEDFSDETNTENLYGTSPPSTPRQMKRMSTKHQRNNVGRPASRSNLKEKMNAPNQPPHKDTGKTVENVEEYSYKQEKKIRAALRTTERDRKKN…
	{"uid": "F5H538", "roi": 596, "R": 0.86846866, "exp_thr": 5.0, "exp_bin": false, "source": "KC2023", "note": "CL1- (mv)", "mw": null, "orig_ambiguous": false, "orig_multi_value": true, "og_uid": "J3KNB8;F5H538;Q9Y6R4;F5H4R1", "sequence": "MREAAAALVPPPAFAVTPAAAMEEPPPPPPPPPPPPEPETESEPECCLAARQEGTLGDSACKSPESDLEDFSDETNTENLYGTSPPSTPRQMKRMSTKHQRNNVGRPASRSNLKEKMNAPNQPPHKDTGKTVENVEEYSYKQEKKIRAALRTTERDRKKN…
	{"uid": "F5H4R1", "roi": 596, "R": 0.86846866, "exp_thr": 5.0, "exp_bin": false, "source": "KC2023", "note": "CL1- (mv)", "mw": null, "orig_ambiguous": false, "orig_multi_value": true, "og_uid": "J3KNB8;F5H538;Q9Y6R4;F5H4R1", "sequence": "MREAAAALVPPPAFAVTPAAAMEEPPPPPPPPPPPPEPETESEPECCLAARQEGTLGDSACKSPESDLEDFSDETNTENLYGTSPPSTPRQMKRMSTKHQRNNVGRPASRSNLKEKMNAPNQPPHKDTGKTVENVEEYSYKQEKKIRAALRTTERDRKKN…
	{"uid": "F8VPD4", "roi": 1392, "R": 0.86834084, "exp_thr": 5.0, "exp_bin": false, "source": "KC2023", "note": "CL1- (mv)", "mw": null, "orig_ambiguous": false, "orig_multi_value": true, "og_uid": "F8VPD4;P27708;H7C3Z5", "sequence": "MAALVLEDGSVLRGQPFGAAVSTAGEVVFQTGMVGYPEALTDPSYKAQILVLTYPLIGNYGIPPDEMDEFGLCKWFESSGIHVAALVVGECCPTPSHWSATRTLHEWLQQHGIPGLQGVDTRELTKKLREQGSLLGKLVQNGTEPSSLPFLDPNARPLVPEVSIKT…
	{"uid": "F8VPD4", "roi": 1826, "R": 0.569645532, "exp_thr": 5.0, "exp_bin": false, "source": "KC2023", "note": "CL1- (mv)", "mw": null, "orig_ambiguous": false, "orig_multi_value": true, "og_uid": "F8VPD4;P27708;H7BZB3", "sequence": "MAALVLEDGSVLRGQPFGAAVSTAGEVVFQTGMVGYPEALTDPSYKAQILVLTYPLIGNYGIPPDEMDEFGLCKWFESSGIHVAALVVGECCPTPSHWSATRTLHEWLQQHGIPGLQGVDTRELTKKLREQGSLLGKLVQNGTEPSSLPFLDPNARPLVPEVSIK…
[truncated: 799 more rows]

[truncated: 12 more sheets: SD10-UIDseqs, SD11-Deduplication, SD12-Precluster-Records, SD13-Cys-Groups-Report, SD14-4S4R-prod-distillation, SD15-UIDsupportReport, SD16-ROIsupportReport, SD17-REPsupportReport, S18-ABPP-hold-out-UIDs, S19-ABPP-hold-out-ROIs, S20-Option-Ablation, S21-Split-level-noise]
